# Supplementary material
Source: ML conference proceedings conference paper supplement (https://openreview.net/forum?id=R03zKO9T9S)
Supplement: supplementary_material [file attachment]

## OVERVIEW

The supplementary material presents the following sections to strengthen the main manuscript:

- **Sec. A** shows the average quantitative results on various datasets under 100 epochs.
- **Sec. B** shows the average quantitative results on various datasets under 300 epochs.
- **Sec. C** shows the specific quantitative results for each class under 100 epochs on MVTec AD [Bergmann et al. \(2019\)](#) dataset.
- **Sec. D** shows the specific quantitative results for each class under 100 epochs on MVTec AD 3D [Bergmann et al. \(2022b\)](#) dataset.
- **Sec. E** shows the specific quantitative results for each class under 100 epochs on MVTec LOCO-AD [Bergmann et al. \(2022a\)](#) dataset.
- **Sec. F** shows the specific quantitative results for each class under 100 epochs on VisA [Zou et al. \(2022\)](#) dataset.
- **Sec. G** shows the specific quantitative results for each class under 100 epochs on BTAD [Mishra et al. \(2021\)](#) dataset.
- **Sec. H** shows the specific quantitative results for each class under 100 epochs on MPDD [Jezek et al. \(2021\)](#) dataset.
- **Sec. I** shows the specific quantitative results for each class under 100 epochs on MAD.Real [Zhou et al. \(2024\)](#) dataset.
- **Sec. J** shows the specific quantitative results for each class under 100 epochs on MAD.Sim [Zhou et al. \(2024\)](#) dataset.
- **Sec. K** shows the specific quantitative results for each class under 100 epochs on Uni-Medical [Zhang et al. \(2023a\)](#) dataset.
- **Sec. L** shows the specific quantitative results for each class under 100 epochs on Real-IAD [Wang et al. \(2024\)](#) dataset.
- **Sec. M** shows the specific quantitative results for each class under 100 epochs on COCO-AD [Zhang et al. \(2024a\)](#) dataset.
- **Sec. N** shows the specific quantitative results for each class under 300 epochs on MVTec AD [Bergmann et al. \(2019\)](#) dataset.
- **Sec. O** shows the specific quantitative results for each class under 300 epochs on MVTec AD 3D [Bergmann et al. \(2022b\)](#) dataset.
- **Sec. P** shows the specific quantitative results for each class under 300 epochs on MVTec LOCO-AD [Bergmann et al. \(2022a\)](#) dataset.
- **Sec. Q** shows the specific quantitative results for each class under 300 epochs on VisA [Zou et al. \(2022\)](#) dataset.
- **Sec. R** shows the specific quantitative results for each class under 300 epochs on BTAD [Mishra et al. \(2021\)](#) dataset.
- **Sec. S** shows the specific quantitative results for each class under 300 epochs on MPDD [Jezek et al. \(2021\)](#) dataset.
- **Sec. T** shows the specific quantitative results for each class under 300 epochs on MAD.Real [Zhou et al. \(2024\)](#) dataset.
- **Sec. U** shows the specific quantitative results for each class under 300 epochs on MAD.Sim [Zhou et al. \(2024\)](#) dataset.
- **Sec. V** shows the specific quantitative results for each class under 300 epochs on Uni-Medical [Zhang et al. \(2023a\)](#) dataset.

## A DETAILED QUANTITATIVE RESULTS ON ALL DATASET UNDER 100 EPOCHS

Table A1: Benchmarked results on MVTec AD dataset [Bergmann et al. \(2019\)](#) by the suggested metrics in Sec. 3.3.

|        | Method                                           | Image-level |             |                      | Pixel-level |             |                      | mAU-PRO     | mIoU-max    | mAD         |
|--------|--------------------------------------------------|-------------|-------------|----------------------|-------------|-------------|----------------------|-------------|-------------|-------------|
|        |                                                  | mAU-ROC     | mAP         | mF <sub>1</sub> -max | mAU-ROC     | mAP         | mF <sub>1</sub> -max |             |             |             |
| Aug.   | DRAEM <a href="#">Zavrtanik et al. (2021)</a>    | 54.5        | 76.3        | 83.6                 | 47.6        | 3.2         | 6.7                  | 14.3        | 3.5         | 44.7        |
|        | SimpleNet <a href="#">Liu et al. (2023)</a>      | 95.4        | 98.3        | 95.7                 | 96.8        | 48.8        | 51.9                 | 86.9        | 36.4        | 83.8        |
|        | RealNet <a href="#">Zhang et al. (2024c)</a>     | 84.8        | 94.1        | 90.9                 | 72.6        | 48.2        | 41.4                 | 56.8        | 28.8        | 72.3        |
| Emb.   | CFA <a href="#">Lee et al. (2022)</a>            | 57.6        | 78.3        | 84.7                 | 54.8        | 11.9        | 14.7                 | 25.3        | 8.9         | 50.1        |
|        | PatchCore <a href="#">Roth et al. (2022)</a>     | <b>98.8</b> | <b>99.5</b> | <b>98.4</b>          | <b>98.3</b> | 59.9        | 61.0                 | 94.2        | 44.9        | <b>88.6</b> |
|        | CFLOW-AD <a href="#">Gudovskiy et al. (2022)</a> | 91.6        | 96.7        | 93.4                 | 95.7        | 45.9        | 48.6                 | 88.3        | 33.2        | 81.8        |
|        | PyramidalFlow <a href="#">Lei et al. (2023)</a>  | 70.2        | 85.5        | 85.5                 | 80.0        | 22.3        | 22.0                 | 47.5        | 12.8        | 61.7        |
|        | RD <a href="#">Deng &amp; Li (2022)</a>          | 93.6        | 97.2        | 95.6                 | 95.8        | 48.2        | 53.6                 | 91.2        | 37.0        | 83.8        |
| Rec.   | DiAD <a href="#">He et al. (2024b)</a>           | 88.9        | 95.8        | 93.5                 | 89.3        | 27.0        | 32.5                 | 63.9        | 21.1        | 70.1        |
|        | ViTAD <a href="#">Zhang et al. (2023a)</a>       | 98.3        | 99.3        | 97.3                 | 97.6        | 55.2        | 58.4                 | 92.0        | 42.3        | 87.1        |
|        | InvAD <a href="#">Zhang et al. (2024a)</a>       | 98.1        | 99.0        | 97.6                 | 98.0        | 56.3        | 59.2                 | <b>94.4</b> | 42.8        | 87.6        |
|        | InvAD-lite <a href="#">Zhang et al. (2024a)</a>  | 97.9        | 99.2        | 96.8                 | 97.3        | 54.4        | 57.8                 | 93.3        | 41.4        | 86.8        |
|        | MambaAD <a href="#">He et al. (2024a)</a>        | 97.8        | 99.3        | 97.3                 | 97.4        | 55.1        | 57.6                 | 93.4        | 41.2        | 87.0        |
| Hybrid | UniAD <a href="#">You et al. (2022)</a>          | 92.5        | 97.3        | 95.4                 | 95.8        | 42.7        | 48.0                 | 89.3        | 32.5        | 82.0        |
|        | RD++ <a href="#">Tien et al. (2023)</a>          | 97.9        | 98.8        | 96.4                 | 97.3        | 54.7        | 58.0                 | 93.2        | 41.5        | 86.8        |
|        | DesTSeg <a href="#">Zhang et al. (2023c)</a>     | 96.4        | 98.6        | 96.2                 | 92.0        | <b>71.1</b> | <b>68.2</b>          | 83.4        | <b>52.8</b> | 87.9        |

Table A2: Benchmarked results on MVTec 3D dataset [Bergmann et al. \(2022b\)](#) by the suggested metrics in Sec. 3.3.

|        | Method                                           | Image-level |             |                      | Pixel-level |             |                      | mAU-PRO     | mIoU-max    | mAD         |
|--------|--------------------------------------------------|-------------|-------------|----------------------|-------------|-------------|----------------------|-------------|-------------|-------------|
|        |                                                  | mAU-ROC     | mAP         | mF <sub>1</sub> -max | mAU-ROC     | mAP         | mF <sub>1</sub> -max |             |             |             |
| Aug.   | DRAEM <a href="#">Zavrtanik et al. (2021)</a>    | 55.7        | 81.8        | 88.8                 | 46.6        | 0.8         | 1.9                  | 21.9        | 1.0         | 46.6        |
|        | SimpleNet <a href="#">Liu et al. (2023)</a>      | 75.8        | 92.3        | 90.4                 | 94.7        | 17.3        | 23.4                 | 81.0        | 13.9        | 70.1        |
|        | CFA <a href="#">Lee et al. (2022)</a>            | 67.1        | 89.3        | 89.6                 | 71.6        | 9.7         | 16.1                 | 43.2        | 9.3         | 58.6        |
| Emb.   | PatchCore <a href="#">Roth et al. (2022)</a>     | 84.1        | <u>95.1</u> | 92.5                 | <u>98.6</u> | 33.7        | 38.5                 | <u>94.4</u> | 24.5        | 78.4        |
|        | CFLOW-AD <a href="#">Gudovskiy et al. (2022)</a> | 73.1        | 91.0        | 90.2                 | 96.8        | 21.6        | 26.6                 | 89.0        | 15.8        | 71.6        |
|        | PyramidalFlow <a href="#">Lei et al. (2023)</a>  | 58.7        | 85.6        | 88.6                 | 90.8        | 7.2         | 12.0                 | 74.9        | 6.4         | 61.9        |
|        | RD <a href="#">Deng &amp; Li (2022)</a>          | 75.8        | 91.2        | 91.5                 | 98.4        | 29.6        | 35.5                 | 93.9        | 22.2        | 75.3        |
|        | DiAD <a href="#">He et al. (2024b)</a>           | 75.4        | 91.0        | 90.9                 | 91.7        | 5.3         | 10.2                 | 74.9        | 5.4         | 62.8        |
| Rec.   | ViTAD <a href="#">Zhang et al. (2023a)</a>       | 79.6        | 93.4        | 91.6                 | 98.0        | 27.2        | 33.3                 | 91.6        | 20.4        | 75.4        |
|        | InvAD <a href="#">Zhang et al. (2024a)</a>       | <b>86.9</b> | <b>96.2</b> | <b>93.3</b>          | <b>98.7</b> | <u>37.4</u> | <u>42.4</u>          | <b>95.2</b> | <u>27.4</u> | <b>80.3</b> |
|        | InvAD-lite <a href="#">Zhang et al. (2024a)</a>  | <u>84.7</u> | 95.6        | 92.6                 | 98.6        | <u>38.3</u> | 41.9                 | 94.2        | 26.9        | 79.6        |
|        | MambaAD <a href="#">He et al. (2024a)</a>        | 84.1        | 95.1        | 92.2                 | 98.6        | 36.9        | 40.8                 | 94.2        | 25.9        | 79.0        |
|        | UniAD <a href="#">You et al. (2022)</a>          | 75.3        | 92.1        | 90.3                 | 96.6        | 21.2        | 27.9                 | 88.9        | 16.7        | 72.3        |
| Hybrid | RD++ <a href="#">Tien et al. (2023)</a>          | 81.8        | 93.9        | 92.8                 | 98.5        | 34.4        | 39.6                 | 94.1        | 25.2        | 78.1        |
|        | DesTSeg <a href="#">Zhang et al. (2023c)</a>     | 79.1        | 93.8        | 90.7                 | 81.1        | <b>41.3</b> | <b>42.7</b>          | 64.0        | <b>28.4</b> | 72.6        |

Table A3: Benchmarked results on MVTec LOCO dataset [Bergmann et al. \(2022a\)](#) by the suggested metrics in Sec. 3.3.

|        | Method                                           | Image-level |             |                      | Pixel-level |             |                      | mAU-PRO     | mIoU-max    | mAD         |
|--------|--------------------------------------------------|-------------|-------------|----------------------|-------------|-------------|----------------------|-------------|-------------|-------------|
|        |                                                  | mAU-ROC     | mAP         | mF <sub>1</sub> -max | mAU-ROC     | mAP         | mF <sub>1</sub> -max |             |             |             |
| Aug.   | DRAEM <a href="#">Zavrtanik et al. (2021)</a>    | 52.5        | 65.4        | 77.6                 | 46.7        | 4.5         | 10.4                 | 12.4        | 5.6         | 41.8        |
|        | SimpleNet <a href="#">Liu et al. (2023)</a>      | 81.6        | 88.5        | <b>82.9</b>          | <b>76.5</b> | 29.0        | 32.7                 | 63.8        | 21.2        | 67.4        |
|        | CFA <a href="#">Lee et al. (2022)</a>            | 66.5        | 78.6        | 77.9                 | 58.5        | 14.2        | 16.3                 | 31.1        | 9.1         | 52.2        |
| Emb.   | PatchCore <a href="#">Roth et al. (2022)</a>     | 80.5        | 89.0        | 81.5                 | 75.1        | 29.9        | 31.8                 | 69.9        | 20.4        | 67.7        |
|        | CFLOW-AD <a href="#">Gudovskiy et al. (2022)</a> | 75.1        | 84.2        | 79.8                 | 70.7        | 25.0        | 27.9                 | 69.5        | 17.3        | 64.0        |
|        | PyramidalFlow <a href="#">Lei et al. (2023)</a>  | 53.4        | 69.3        | 77.5                 | 57.7        | 15.0        | 14.5                 | 25.7        | 8.0         | 47.5        |
|        | RD <a href="#">Deng &amp; Li (2022)</a>          | 74.6        | 85.3        | 78.9                 | 70.7        | 21.0        | 26.1                 | 67.7        | 15.8        | 63.0        |
|        | DiAD <a href="#">He et al. (2024b)</a>           | 71.3        | 79.5        | 80.9                 | 71.8        | 19.0        | 24.8                 | 48.4        | 14.9        | 56.5        |
| Rec.   | ViTAD <a href="#">Zhang et al. (2023a)</a>       | 76.4        | 85.2        | 79.6                 | 73.4        | 28.7        | 31.2                 | 63.1        | 19.8        | 64.8        |
|        | InvAD <a href="#">Zhang et al. (2024a)</a>       | <b>82.0</b> | <b>89.9</b> | 82.0                 | 76.4        | <u>31.1</u> | <b>34.8</b>          | <b>73.0</b> | <b>23.1</b> | <b>69.2</b> |
|        | InvAD-lite <a href="#">Zhang et al. (2024a)</a>  | 79.4        | 87.8        | 80.9                 | 75.8        | 28.5        | 32.2                 | 69.4        | 20.6        | 67.1        |
|        | MambaAD <a href="#">He et al. (2024a)</a>        | 75.8        | 85.5        | 81.0                 | <b>76.5</b> | 28.8        | 32.5                 | <u>70.2</u> | 20.6        | 66.4        |
|        | UniAD <a href="#">You et al. (2022)</a>          | 73.2        | 82.1        | 79.6                 | 73.1        | <u>30.7</u> | 33.4                 | 64.7        | 21.6        | 64.4        |
| Hybrid | RD++ <a href="#">Tien et al. (2023)</a>          | 76.4        | 86.8        | 79.2                 | 71.5        | 24.3        | 28.3                 | 68.8        | 17.6        | 64.5        |
|        | DesTSeg <a href="#">Zhang et al. (2023c)</a>     | 77.9        | 86.7        | 81.3                 | 64.1        | <b>35.2</b> | 30.5                 | 53.4        | 20.3        | 63.9        |

Table A4: Benchmarked results on VisA dataset [Zou et al. \(2022\)](#) by the suggested metrics in Sec. 3.3.

| Method |                                              | Image-level                                      |             |                      | Pixel-level |             |                      | mAU-PRO     | mIoU-max    | mAD         |             |
|--------|----------------------------------------------|--------------------------------------------------|-------------|----------------------|-------------|-------------|----------------------|-------------|-------------|-------------|-------------|
|        |                                              | mAU-ROC                                          | mAP         | mF <sub>1</sub> -max | mAU-ROC     | mAP         | mF <sub>1</sub> -max |             |             |             |             |
| Avg    | Aug.                                         | DRAEM <a href="#">Zavrtanik et al. (2021)</a>    | 55.1        | 62.4                 | 72.9        | 37.5        | 0.6                  | 1.7         | 10.0        | 0.9         | 38.0        |
|        |                                              | SimpleNet <a href="#">Liu et al. (2023)</a>      | 86.4        | 89.1                 | 82.8        | 96.6        | 34.0                 | 37.8        | 79.2        | 25.7        | 74.0        |
|        |                                              | RealNet <a href="#">Zhang et al. (2024c)</a>     | 71.4        | 79.5                 | 74.7        | 61.0        | 25.7                 | 22.6        | 27.4        | 13.5        | 54.7        |
|        | Emb.                                         | CFA <a href="#">Lee et al. (2022)</a>            | 66.3        | 74.3                 | 74.2        | 81.3        | 22.1                 | 26.2        | 50.8        | 17.0        | 58.4        |
|        |                                              | CFLOW-AD <a href="#">Gudovskiy et al. (2022)</a> | 86.5        | 88.8                 | 84.9        | 97.7        | 33.9                 | 37.2        | 86.8        | 24.9        | 75.3        |
|        |                                              | PyramidalFlow <a href="#">Lei et al. (2023)</a>  | 58.2        | 66.3                 | 74.4        | 77.0        | 7.2                  | 9.6         | 42.8        | 5.6         | 50.2        |
|        | Rec.                                         | RD <a href="#">Deng &amp; Li (2022)</a>          | 90.6        | 90.9                 | 89.3        | 98.0        | 35.4                 | 42.5        | 91.9        | 27.9        | 78.6        |
|        |                                              | DiAD <a href="#">He et al. (2024b)</a>           | 84.8        | 88.5                 | 86.9        | 82.5        | 17.9                 | 23.2        | 44.5        | 14.9        | 61.2        |
|        |                                              | ViTAD <a href="#">Zhang et al. (2023a)</a>       | 90.4        | 91.1                 | 86.0        | 98.2        | 36.4                 | 41.0        | 85.7        | 27.5        | 77.2        |
|        |                                              | InvAD <a href="#">Zhang et al. (2024a)</a>       | <b>95.4</b> | <b>95.7</b>          | <b>91.6</b> | <b>98.9</b> | <b>43.3</b>          | <b>46.8</b> | <b>93.1</b> | <b>32.5</b> | <b>82.4</b> |
|        |                                              | InvAD-lite <a href="#">Zhang et al. (2024a)</a>  | 94.9        | 95.2                 | 90.7        | 98.6        | 40.2                 | 44.0        | <b>93.1</b> | 29.8        | <b>81.3</b> |
|        |                                              | MambaAD <a href="#">He et al. (2024a)</a>        | 94.5        | 94.9                 | 90.2        | 98.4        | 39.3                 | 43.7        | 92.1        | 29.5        | 80.8        |
| Hybrid | UniAD <a href="#">You et al. (2022)</a>      | 89.0                                             | 91.0        | 85.8                 | 98.3        | 34.5        | 39.6                 | 86.5        | 26.4        | 76.7        |             |
|        | RD++ <a href="#">Tien et al. (2023)</a>      | 93.9                                             | 94.7        | 90.2                 | 98.4        | 42.3        | 46.3                 | 91.9        | 31.2        | 81.3        |             |
|        | DesTSeg <a href="#">Zhang et al. (2023c)</a> | 89.9                                             | 91.4        | 86.7                 | 86.7        | <b>46.6</b> | <b>47.2</b>          | 61.1        | <b>32.7</b> | 74.9        |             |

Table A5: Benchmarked results on BTAD dataset [Mishra et al. \(2021\)](#) by the suggested metrics in Sec. 3.3.

| Method |                                              | Image-level                                      |      |                      | Pixel-level |      |                      | mAU-PRO | mIoU-max | mAD  |      |
|--------|----------------------------------------------|--------------------------------------------------|------|----------------------|-------------|------|----------------------|---------|----------|------|------|
|        |                                              | mAU-ROC                                          | mAP  | mF <sub>1</sub> -max | mAU-ROC     | mAP  | mF <sub>1</sub> -max |         |          |      |      |
| Avg    | Aug.                                         | DRAEM <a href="#">Zavrtanik et al. (2021)</a>    | 71.3 | 78.5                 | 78.0        | 49.0 | 3.7                  | 6.5     | 16.2     | 3.4  | 47.4 |
|        |                                              | SimpleNet <a href="#">Liu et al. (2023)</a>      | 93.2 | 97.3                 | 93.3        | 96.3 | 41.5                 | 44.3    | 69.8     | 28.6 | 78.8 |
|        |                                              | RealNet <a href="#">Zhang et al. (2024c)</a>     | 89.7 | 95.3                 | 92.8        | 84.0 | 48.1                 | 52.7    | 53.4     | 36.6 | 76.1 |
|        | Emb.                                         | CFA <a href="#">Lee et al. (2022)</a>            | 92.7 | 97.5                 | 93.5        | 96.3 | 47.4                 | 50.2    | 69.5     | 33.6 | 80.2 |
|        |                                              | PatchCore <a href="#">Roth et al. (2022)</a>     | 94.4 | 98.2                 | 94.6        | 97.5 | 55.0                 | 54.9    | 76.0     | 38.0 | 83.3 |
|        |                                              | CFLOW-AD <a href="#">Gudovskiy et al. (2022)</a> | 91.2 | 94.8                 | 88.3        | 96.8 | 45.6                 | 50.1    | 72.7     | 33.8 | 78.9 |
|        | Rec.                                         | PyramidalFlow <a href="#">Lei et al. (2023)</a>  | 87.0 | 83.1                 | 81.0        | 90.9 | 29.6                 | 26.9    | 64.1     | 18.3 | 68.3 |
|        |                                              | RD <a href="#">Deng &amp; Li (2022)</a>          | 94.4 | 96.6                 | 94.0        | 98.1 | 59.6                 | 59.2    | 80.7     | 42.1 | 84.7 |
|        |                                              | DiAD <a href="#">He et al. (2024b)</a>           | 90.1 | 88.4                 | 92.6        | 91.7 | 19.6                 | 26.7    | 70.4     | 15.7 | 68.5 |
|        |                                              | ViTAD <a href="#">Zhang et al. (2023a)</a>       | 93.6 | 96.8                 | 93.3        | 97.6 | 59.2                 | 56.7    | 73.2     | 40.1 | 83.1 |
|        |                                              | InvAD <a href="#">Zhang et al. (2024a)</a>       | 96.1 | 97.8                 | 94.3        | 98.1 | 62.6                 | 61.4    | 80.9     | 44.3 | 85.9 |
|        |                                              | InvAD-lite <a href="#">Zhang et al. (2024a)</a>  | 93.1 | 97.4                 | 94.6        | 97.9 | 59.2                 | 59.7    | 78.6     | 42.6 | 84.4 |
| Hybrid | MambaAD <a href="#">He et al. (2024a)</a>    | 93.1                                             | 96.1 | 92.5                 | 97.7        | 52.5 | 56.0                 | 78.2    | 39.0     | 82.5 |      |
|        | UniAD <a href="#">You et al. (2022)</a>      | 94.8                                             | 98.3 | 94.2                 | 97.2        | 50.3 | 53.8                 | 78.8    | 36.9     | 82.9 |      |
|        | RD++ <a href="#">Tien et al. (2023)</a>      | 94.6                                             | 97.8 | 94.1                 | 98.0        | 59.6 | 59.8                 | 79.0    | 42.8     | 84.8 |      |
|        | DesTSeg <a href="#">Zhang et al. (2023c)</a> | 92.8                                             | 95.9 | 92.3                 | 92.2        | 34.8 | 44.3                 | 70.0    | 29.0     | 77.0 |      |

Table A6: Benchmarked results on MPDD dataset [Jezek et al. \(2021\)](#) by the suggested metrics in Sec. 3.3.

| Method |                                                  | Image-level |             |                      | Pixel-level |             |                      | mAU-PRO     | mIoU-max    | mAD         |
|--------|--------------------------------------------------|-------------|-------------|----------------------|-------------|-------------|----------------------|-------------|-------------|-------------|
|        |                                                  | mAU-ROC     | mAP         | mF <sub>1</sub> -max | mAU-ROC     | mAP         | mF <sub>1</sub> -max |             |             |             |
| Aug.   | DRAEM <a href="#">Zavrtanik et al. (2021)</a>    | 35.6        | 53.3        | 72.5                 | 42.1        | 2.2         | 4.6                  | 19.0        | 2.5         | 35.4        |
|        | SimpleNet <a href="#">Liu et al. (2023)</a>      | 88.4        | 92.0        | 87.9                 | 96.5        | 32.0        | 34.6                 | 89.0        | 24.5        | 76.2        |
|        | RealNet <a href="#">Zhang et al. (2024c)</a>     | 85.1        | 90.2        | 88.3                 | 83.3        | 36.1        | 39.6                 | 68.1        | 28.2        | 72.3        |
| Emb.   | CFA <a href="#">Lee et al. (2022)</a>            | 81.6        | 87.7        | 85.7                 | 84.9        | 19.6        | 22.9                 | 53.5        | 16.6        | 65.1        |
|        | PatchCore <a href="#">Roth et al. (2022)</a>     | <b>94.6</b> | <b>96.9</b> | <b>93.4</b>          | <b>98.9</b> | <b>46.1</b> | <b>47.6</b>          | <b>95.7</b> | <b>35.0</b> | <b>83.5</b> |
|        | CFLOW-AD <a href="#">Gudovskiy et al. (2022)</a> | 75.7        | 80.1        | 81.7                 | 96.8        | 26.3        | 28.0                 | 89.5        | 20.1        | 69.7        |
|        | PyramidalFlow <a href="#">Lei et al. (2023)</a>  | 73.6        | 77.0        | 79.4                 | 94.1        | 21.1        | 17.8                 | 77.2        | 10.4        | 64.6        |
| Rec.   | RD <a href="#">Deng &amp; Li (2022)</a>          | 91.3        | 93.6        | 91.8                 | 98.3        | 40.4        | 41.8                 | 95.5        | 31.4        | 80.6        |
|        | DiAD <a href="#">He et al. (2024b)</a>           | 68.3        | 77.9        | 80.1                 | 90.4        | 10.9        | 13.1                 | 66.1        | 8.2         | 58.1        |
|        | ViTAD <a href="#">Zhang et al. (2023a)</a>       | 87.8        | 90.5        | 88.0                 | 97.7        | 35.2        | 37.4                 | 92.8        | 27.7        | 77.3        |
|        | InvAD <a href="#">Zhang et al. (2024a)</a>       | 93.7        | 93.9        | 93.0                 | 98.2        | 42.4        | 45.7                 | 94.8        | 34.0        | 81.9        |
|        | InvAD-lite <a href="#">Zhang et al. (2024a)</a>  | 90.9        | 92.9        | 89.5                 | 98.0        | 39.7        | 42.6                 | 94.0        | 30.9        | 79.8        |
|        | MambaAD <a href="#">He et al. (2024a)</a>        | 88.7        | 93.2        | 90.8                 | 97.5        | 33.6        | 38.1                 | 92.3        | 26.8        | 78.1        |
|        | UniAD <a href="#">You et al. (2022)</a>          | 70.5        | 76.0        | 78.0                 | 93.9        | 13.7        | 19.9                 | 79.7        | 12.5        | 63.3        |
|        | RD++ <a href="#">Tien et al. (2023)</a>          | 90.2        | 93.3        | 90.5                 | 98.5        | 43.0        | 44.1                 | 95.5        | 33.6        | 80.8        |
|        | DesTSeg <a href="#">Zhang et al. (2023c)</a>     | 91.3        | 90.8        | 90.2                 | 82.0        | 32.6        | 34.6                 | 63.3        | 25.6        | 71.9        |

Table A7: Benchmarked results on MAD Real dataset [Zhou et al. \(2024\)](#) by the suggested metrics in Sec. 3.3.

|        | Method                                       | Image-level                                      |             |                      | Pixel-level |             |                      | mAU-PRO     | mIoU-max    | mAD         |             |
|--------|----------------------------------------------|--------------------------------------------------|-------------|----------------------|-------------|-------------|----------------------|-------------|-------------|-------------|-------------|
|        |                                              | mAU-ROC                                          | mAP         | mF <sub>1</sub> -max | mAU-ROC     | mAP         | mF <sub>1</sub> -max |             |             |             |             |
| Avg    | Aug.                                         | DRAEM <a href="#">Zavrtanik et al. (2021)</a>    | 59.1        | <b>88.1</b>          | 90.4        | 49.4        | 0.6                  | 1.7         | 22.3        | 0.8         | 48.9        |
|        |                                              | SimpleNet <a href="#">Liu et al. (2023)</a>      | 47.8        | 81.9                 | 90.7        | 83.1        | 5.4                  | 11.6        | 59.8        | 6.3         | 56.7        |
|        |                                              | CFA <a href="#">Lee et al. (2022)</a>            | 49.3        | 81.7                 | 91.4        | 83.3        | 10.5                 | 15.2        | 64.2        | 8.7         | 58.7        |
|        | Emb.                                         | PatchCore <a href="#">Roth et al. (2022)</a>     | 59.7        | 84.8                 | 93.5        | <b>95.4</b> | <b>20.2</b>          | <b>27.3</b> | <b>85.5</b> | <b>16.6</b> | <b>68.2</b> |
|        |                                              | CFLOW-AD <a href="#">Gudovskiy et al. (2022)</a> | 59.8        | 86.0                 | 91.2        | 90.9        | <u>10.7</u>          | <u>15.4</u> | 74.4        | 8.8         | 63.4        |
|        |                                              | PyramidalFlow <a href="#">Lei et al. (2023)</a>  | 52.1        | 83.6                 | 90.3        | 88.4        | 5.0                  | 9.4         | 68.2        | 5.1         | 59.0        |
|        | Rec.                                         | RD <a href="#">Deng &amp; Li (2022)</a>          | 55.5        | 85.8                 | 90.6        | 87.0        | 8.2                  | 12.8        | 67.8        | 7.2         | 60.6        |
|        |                                              | DiAD <a href="#">He et al. (2024b)</a>           | 49.9        | 85.1                 | 90.8        | 87.7        | 2.9                  | 6.8         | 67.4        | 3.6         | 55.8        |
|        |                                              | ViTAD <a href="#">Zhang et al. (2023a)</a>       | 47.0        | 81.3                 | 90.2        | 87.3        | 4.5                  | 9.3         | 66.6        | 5.0         | 57.4        |
|        |                                              | InvAD <a href="#">Zhang et al. (2024a)</a>       | <b>66.5</b> | <u>87.7</u>          | <b>93.8</b> | 88.3        | <b>22.1</b>          | <u>26.2</u> | 73.2        | <b>16.8</b> | 67.6        |
|        |                                              | InvAD-lite <a href="#">Zhang et al. (2024a)</a>  | 60.4        | 84.3                 | 92.2        | 88.2        | 9.0                  | 14.3        | 72.9        | 8.1         | 62.5        |
|        |                                              | MambaAD <a href="#">He et al. (2024a)</a>        | 56.2        | 84.3                 | 90.3        | 87.8        | 7.5                  | 12.8        | 68.5        | 7.2         | 60.5        |
| Hybrid | UniAD <a href="#">You et al. (2022)</a>      | 47.6                                             | 81.3        | 90.4                 | 88.2        | 5.8         | 10.6                 | 68.6        | 5.8         | 58.2        |             |
|        | RD++ <a href="#">Tien et al. (2023)</a>      | 54.7                                             | 83.9        | <u>92.3</u>          | 88.5        | 9.4         | 14.9                 | 70.4        | 8.5         | 61.4        |             |
|        | DesTSeg <a href="#">Zhang et al. (2023c)</a> | 45.4                                             | 80.3        | <u>90.7</u>          | 72.7        | 5.0         | 8.2                  | 48.3        | 4.5         | 52.8        |             |

Table A8: Benchmarked results on MAD\_Sim dataset [Zhou et al. \(2024\)](#) by the suggested metrics in [Sec. 3.3](#).

|     | Method | Image-level                                      |      |                      | Pixel-level |      |                      | mAU-PRO | mIoU-max | mAD |      |
|-----|--------|--------------------------------------------------|------|----------------------|-------------|------|----------------------|---------|----------|-----|------|
|     |        | mAU-ROC                                          | mAP  | mF <sub>1</sub> -max | mAU-ROC     | mAP  | mF <sub>1</sub> -max |         |          |     |      |
| Avg | Aug.   | DRAEM <a href="#">Zavrtanik et al. (2021)</a>    | 49.5 | 88.3                 | 93.8        | 48.4 | 0.8                  | 1.5     | 24.5     | 0.7 | 48.0 |
|     |        | SimpleNet <a href="#">Liu et al. (2023)</a>      | 58.9 | 91.7                 | 93.8        | 85.5 | 4.2                  | 8.0     | 63.9     | 4.2 | 60.9 |
|     |        | CFA <a href="#">Lee et al. (2022)</a>            | 56.4 | 91.1                 | 93.8        | 76.6 | 4.2                  | 8.7     | 54.7     | 4.6 | 58.2 |
|     | Emb.   | CFLOW-AD <a href="#">Gudovskiy et al. (2022)</a> | 55.8 | 90.6                 | 93.8        | 86.9 | 3.4                  | 5.2     | 63.9     | 2.7 | 60.0 |
|     |        | PyramidalFlow <a href="#">Lei et al. (2023)</a>  | 50.8 | 88.9                 | 93.8        | 82.0 | 2.3                  | 4.8     | 58.8     | 2.5 | 57.4 |
|     |        | RD <a href="#">Deng &amp; Li (2022)</a>          | 58.6 | 91.7                 | 93.8        | 88.3 | 4.7                  | 8.5     | 74.2     | 4.5 | 62.6 |
|     | Rec.   | DiAD <a href="#">He et al. (2024b)</a>           | 65.7 | 93.3                 | 94.1        | 87.2 | 3.9                  | 7.9     | 60.1     | 4.2 | 58.9 |
|     |        | ViTAD <a href="#">Zhang et al. (2023a)</a>       | 58.5 | 91.5                 | 93.8        | 89.0 | 5.0                  | 9.5     | 73.5     | 5.0 | 62.8 |
|     |        | InvAD <a href="#">Zhang et al. (2024a)</a>       | 70.4 | 94.6                 | 93.9        | 90.5 | 8.8                  | 15.7    | 79.3     | 8.6 | 67.4 |
|     |        | InvAD-lite <a href="#">Zhang et al. (2024a)</a>  | 64.7 | 93.3                 | 93.8        | 89.4 | 6.4                  | 11.2    | 76.1     | 6.0 | 64.9 |
|     |        | MambaAD <a href="#">He et al. (2024a)</a>        | 63.0 | 92.9                 | 93.8        | 88.3 | 5.2                  | 9.4     | 73.3     | 5.0 | 63.6 |
|     | Hybrid | UniAD <a href="#">You et al. (2022)</a>          | 54.2 | 90.0                 | 93.8        | 88.1 | 3.5                  | 6.8     | 71.8     | 3.5 | 60.9 |
|     |        | RD++ <a href="#">Tien et al. (2023)</a>          | 59.3 | 91.7                 | 93.8        | 88.3 | 4.6                  | 8.5     | 73.8     | 4.4 | 62.7 |
|     |        | DesTSeg <a href="#">Zhang et al. (2023c)</a>     | 57.9 | 91.8                 | 93.8        | 54.5 | 6.2                  | 7.7     | 35.8     | 4.1 | 53.6 |

Table A9: Benchmarked results on Uni-Medical dataset [Zhang et al. \(2023a\)](#) by the suggested metrics in [Sec. 3.3](#).

|     | Method | Image-level                                      |             |                      | Pixel-level |             |                      | mAU-PRO     | mIoU-max    | mAD         |             |
|-----|--------|--------------------------------------------------|-------------|----------------------|-------------|-------------|----------------------|-------------|-------------|-------------|-------------|
|     |        | mAU-ROC                                          | mAP         | mF <sub>1</sub> -max | mAU-ROC     | mAP         | mF <sub>1</sub> -max |             |             |             |             |
| Avg | Aug.   | DRAEM <a href="#">Zavrtanik et al. (2021)</a>    | 51.6        | 60.6                 | 70.6        | 33.8        | 2.0                  | 5.7         | 10.5        | 3.0         | 37.0        |
|     |        | SimpleNet <a href="#">Liu et al. (2023)</a>      | 77.5        | 77.7                 | 76.7        | 94.3        | 34.4                 | 36.0        | 77.0        | 23.3        | 68.9        |
|     |        | CFA <a href="#">Lee et al. (2022)</a>            | 71.0        | 73.3                 | 73.1        | 78.3        | 19.5                 | 24.9        | 44.7        | 14.7        | 57.2        |
|     | Emb.   | CFLOW-AD <a href="#">Gudovskiy et al. (2022)</a> | 79.2        | 79.6                 | 77.2        | 95.4        | 40.4                 | 26.9        | 81.8        | 17.7        | 69.9        |
|     |        | PyramidalFlow <a href="#">Lei et al. (2023)</a>  | 53.9        | 57.3                 | 70.5        | 78.8        | 8.4                  | 17.1        | 34.2        | 9.4         | 47.6        |
|     |        | RD <a href="#">Deng &amp; Li (2022)</a>          | 76.1        | 75.7                 | 78.2        | 96.5        | 38.8                 | 39.8        | 86.8        | 26.9        | 71.1        |
|     | Rec.   | DiAD <a href="#">He et al. (2024b)</a>           | 78.8        | 77.2                 | 77.7        | 95.8        | 34.2                 | 35.5        | 84.3        | 23.2        | 69.1        |
|     |        | ViTAD <a href="#">Zhang et al. (2023a)</a>       | 81.8        | 80.7                 | 80.0        | 97.1        | <b>48.3</b>          | <b>48.2</b> | 86.7        | <b>33.7</b> | <b>75.5</b> |
|     |        | InvAD <a href="#">Zhang et al. (2024a)</a>       | 82.4        | 80.5                 | 80.5        | <b>97.3</b> | 46.2                 | 46.1        | <b>89.3</b> | 32.6        | <u>75.4</u> |
|     |        | InvAD-lite <a href="#">Zhang et al. (2024a)</a>  | 77.9        | 77.3                 | 79.1        | 96.2        | 39.0                 | 39.3        | 85.8        | 26.5        | 71.6        |
|     |        | MambaAD <a href="#">He et al. (2024a)</a>        | <b>83.9</b> | <b>80.8</b>          | <b>81.9</b> | 96.8        | 45.8                 | 47.5        | 88.2        | 33.5        | <b>75.9</b> |
|     | Hybrid | UniAD <a href="#">You et al. (2022)</a>          | 79.0        | 76.1                 | 77.1        | 96.6        | 39.3                 | 41.1        | 86.0        | 27.6        | 71.6        |
|     |        | RD++ <a href="#">Tien et al. (2023)</a>          | 77.2        | 76.5                 | 79.2        | 96.7        | 41.5                 | 42.2        | 87.8        | 29.4        | 72.3        |
|     |        | DesTSeg <a href="#">Zhang et al. (2023c)</a>     | 78.5        | 77.0                 | 78.2        | 65.7        | 41.7                 | 34.0        | 35.3        | 21.2        | 61.0        |

Table A10: Benchmarked results on Real-IAD dataset [Wang et al. \(2024\)](#) by the suggested metrics in [Sec. 3.3](#).

|     | Method | Image-level                                      |             |                      | Pixel-level |             |                      | mAU-PRO     | mIoU-max    | mAD         |             |
|-----|--------|--------------------------------------------------|-------------|----------------------|-------------|-------------|----------------------|-------------|-------------|-------------|-------------|
|     |        | mAU-ROC                                          | mAP         | mF <sub>1</sub> -max | mAU-ROC     | mAP         | mF <sub>1</sub> -max |             |             |             |             |
| Avg | Aug.   | DRAEM <a href="#">Zavrtanik et al. (2021)</a>    | 50.9        | 45.9                 | 61.3        | 44.0        | 0.2                  | 0.4         | 13.6        | 0.2         | 33.6        |
|     |        | SimpleNet <a href="#">Liu et al. (2023)</a>      | 54.9        | 50.6                 | 61.5        | 76.1        | 1.9                  | 4.9         | 42.4        | 2.5         | 43.5        |
|     |        | CFA <a href="#">Lee et al. (2022)</a>            | 55.7        | 50.5                 | 61.9        | 81.3        | 1.6                  | 3.8         | 48.8        | 2.0         | 45.0        |
|     | Emb.   | CFLOW-AD <a href="#">Gudovskiy et al. (2022)</a> | 77.0        | 75.8                 | 69.9        | 94.8        | 17.6                 | 21.7        | 80.4        | 12.4        | 63.9        |
|     |        | PyramidalFlow <a href="#">Lei et al. (2023)</a>  | 54.4        | 48.0                 | 62.0        | 71.1        | 1.2                  | 1.1         | 34.9        | 0.5         | 40.9        |
|     |        | RD <a href="#">Deng &amp; Li (2022)</a>          | 82.7        | 79.3                 | 74.1        | 97.2        | 25.2                 | 32.8        | 90.0        | 20.0        | 70.0        |
|     | Rec.   | DiAD <a href="#">He et al. (2024b)</a>           | 75.6        | 66.4                 | 69.9        | 88.0        | 2.9                  | 7.1         | 58.1        | 3.7         | 52.6        |
|     |        | ViTAD <a href="#">Zhang et al. (2023a)</a>       | 82.7        | 80.2                 | 73.7        | 97.2        | 24.3                 | 32.3        | 84.8        | 19.6        | 69.3        |
|     |        | InvAD <a href="#">Zhang et al. (2024a)</a>       | <b>89.4</b> | <b>87.0</b>          | <b>80.2</b> | 98.4        | 32.6                 | 38.9        | <b>92.7</b> | 24.6        | <b>75.6</b> |
|     |        | InvAD-lite <a href="#">Zhang et al. (2024a)</a>  | 87.2        | 85.2                 | 77.8        | 98.0        | 31.7                 | 37.9        | 92.0        | 23.8        | 74.2        |
|     |        | MambaAD <a href="#">He et al. (2024a)</a>        | 87.0        | 85.3                 | 77.6        | <b>98.6</b> | 32.4                 | 38.1        | 91.2        | 23.9        | 74.2        |
|     | Hybrid | UniAD <a href="#">You et al. (2022)</a>          | 83.1        | 81.2                 | 74.5        | 97.4        | 23.3                 | 30.9        | 87.1        | 18.6        | 69.6        |
|     |        | RD++ <a href="#">Tien et al. (2023)</a>          | 83.6        | 80.6                 | 74.8        | 97.7        | 25.9                 | 33.6        | 90.7        | 20.5        | <u>70.8</u> |
|     |        | DesTSeg <a href="#">Zhang et al. (2023c)</a>     | 79.3        | 76.7                 | 70.7        | 80.3        | <b>36.9</b>          | <b>40.3</b> | 56.1        | <b>26.2</b> | 64.5        |

Table A11: Benchmarked results on COCO-AD dataset [Zhang et al. \(2024a\)](#) by the suggested metrics in [Sec. 3.3](#).

|     | Method                                                | Image-level |             |                      | Pixel-level |             |                      | mAU-PRO     | mIoU-max    | mAD         |
|-----|-------------------------------------------------------|-------------|-------------|----------------------|-------------|-------------|----------------------|-------------|-------------|-------------|
|     |                                                       | mAU-ROC     | mAP         | mF <sub>1</sub> -max | mAU-ROC     | mAP         | mF <sub>1</sub> -max |             |             |             |
| Avg | Aug. DRAEM <a href="#">Zavrtanik et al. (2021)</a>    | 53.5        | 48.5        | 62.5                 | 49.9        | 7.6         | 14.4                 | 15.3        | 8.0         | 38.3        |
|     | SimpleNet <a href="#">Liu et al. (2023)</a>           | 55.6        | 49.4        | 62.3                 | 60.2        | 14.5        | 19.2                 | 26.1        | 11.5        | 42.9        |
|     | CFA <a href="#">Lee et al. (2022)</a>                 | 56.7        | 51.2        | 62.6                 | 56.2        | 10.3        | 16.0                 | 17.9        | 8.9         | 41.0        |
|     | Emb. CFLOW-AD <a href="#">Gudovskiy et al. (2022)</a> | <b>67.7</b> | <b>57.9</b> | <b>64.5</b>          | <b>76.0</b> | <b>20.3</b> | <b>26.4</b>          | <b>47.7</b> | <b>16.0</b> | <b>53.0</b> |
|     | PyramidalFlow <a href="#">Lei et al. (2023)</a>       | 51.6        | 47.4        | 61.6                 | 50.0        | 13.4        | 14.4                 | 15.0        | 8.0         | 38.4        |
|     | RD <a href="#">Deng &amp; Li (2022)</a>               | 57.6        | 49.9        | 62.0                 | 66.5        | 13.9        | 20.0                 | 39.8        | 11.5        | 45.8        |
|     | DiAD <a href="#">He et al. (2024b)</a>                | 59.0        | 53.0        | 63.2                 | 68.1        | 20.5        | 14.2                 | 30.8        | 11.6        | 44.1        |
|     | ViTAD <a href="#">Zhang et al. (2023a)</a>            | 66.9        | <b>59.3</b> | 63.7                 | <b>76.2</b> | <b>27.6</b> | <b>32.2</b>          | 39.1        | <b>20.1</b> | <b>53.5</b> |
|     | InvAD <a href="#">Zhang et al. (2024a)</a>            | 64.2        | 56.0        | 63.4                 | 71.2        | 18.5        | 24.1                 | 45.8        | 14.3        | 50.5        |
|     | InvAD-lite <a href="#">Zhang et al. (2024a)</a>       | 63.3        | 56.0        | 62.9                 | 69.9        | 18.2        | 23.1                 | 39.7        | 13.7        | 49.2        |
|     | MambaAD <a href="#">He et al. (2024a)</a>             | 62.8        | 55.2        | 62.8                 | 68.9        | 16.7        | 22.0                 | 41.6        | 12.9        | 48.8        |
|     | Hybrid UniAD <a href="#">You et al. (2022)</a>        | 55.2        | 49.3        | 61.7                 | 64.6        | 12.8        | 19.0                 | 34.3        | 10.9        | 44.0        |
|     | RD++ <a href="#">Tien et al. (2023)</a>               | 57.5        | 49.3        | 62.0                 | 68.2        | 15.5        | 20.1                 | 42.2        | 11.8        | 46.4        |
|     | DesTSeg <a href="#">Zhang et al. (2023c)</a>          | 54.4        | 49.4        | 61.8                 | 54.5        | 10.6        | 15.4                 | 24.4        | 8.5         | 40.7        |

## B DETAILED QUANTITATIVE RESULTS ON ALL DATASET UNDER 300 EPOCHS

Table A12: Benchmarked results on MVTec AD dataset [Bergmann et al. \(2019\)](#) by the suggested metrics in Sec. 3.3.

|        | Method                                           | Image-level |             |                      | Pixel-level |             |                      | mAU-PRO     | mIoU-max    | mAD         |
|--------|--------------------------------------------------|-------------|-------------|----------------------|-------------|-------------|----------------------|-------------|-------------|-------------|
|        |                                                  | mAU-ROC     | mAP         | mF <sub>1</sub> -max | mAU-ROC     | mAP         | mF <sub>1</sub> -max |             |             |             |
| Aug.   | DRAEM <a href="#">Zavrtanik et al. (2021)</a>    | 55.2        | 77.0        | 83.9                 | 48.7        | 3.1         | 6.3                  | 15.8        | 3.3         | 45.3        |
|        | SimpleNet <a href="#">Liu et al. (2023)</a>      | 79.2        | 90.8        | 87.6                 | 82.4        | 24.0        | 29.0                 | 62.0        | 17.8        | 67.6        |
|        | RealNet <a href="#">Zhang et al. (2024c)</a>     | 82.9        | 93.3        | 90.9                 | 69.8        | 50.0        | 40.4                 | 51.2        | 28.5        | 70.9        |
| Emb.   | CFA <a href="#">Lee et al. (2022)</a>            | 55.8        | 78.8        | 84.5                 | 43.9        | 4.8         | 8.9                  | 19.3        | 4.7         | 46.1        |
|        | CFLOW-AD <a href="#">Gudovskiy et al. (2022)</a> | 92.7        | 97.2        | 94.0                 | 95.8        | 46.8        | 49.6                 | 89.0        | 34.0        | 82.5        |
|        | PyramidalFlow <a href="#">Lei et al. (2023)</a>  | 66.2        | 84.3        | 85.1                 | 74.2        | 17.2        | 19.6                 | 40.0        | 11.4        | 58.1        |
| Avg    | RD Deng & Li (2022)                              | 90.5        | 95.0        | 95.1                 | 95.9        | 47.1        | 52.1                 | 91.2        | 35.8        | 82.6        |
|        | DiAD He et al. (2024b)                           | 92.0        | 96.8        | 94.4                 | 89.3        | 27.3        | 32.7                 | 64.4        | 21.3        | 71.0        |
|        | ViTAD Zhang et al. (2023a)                       | 98.4        | 99.4        | 97.5                 | 97.5        | 55.2        | 58.1                 | 91.7        | 42.0        | 87.0        |
|        | InvAD Zhang et al. (2024a)                       | <b>98.9</b> | <b>99.6</b> | <b>98.2</b>          | <b>98.1</b> | <b>57.1</b> | <b>59.6</b>          | <b>94.4</b> | <b>43.1</b> | <b>88.1</b> |
|        | InvAD-lite Zhang et al. (2024a)                  | 98.1        | 99.1        | 96.8                 | 97.3        | 55.0        | 58.1                 | 93.1        | 41.7        | 86.9        |
|        | MambaAD He et al. (2024a)                        | 98.5        | 99.5        | 97.7                 | 97.6        | 56.1        | 58.7                 | 93.6        | 42.3        | 87.5        |
|        | UniAD You et al. (2022)                          | 96.8        | 98.9        | 97.0                 | 96.8        | 45.0        | 50.2                 | 91.0        | 34.2        | 84.2        |
| Hybrid | RD++ Tien et al. (2023)                          | 95.8        | 98.0        | 96.6                 | 97.3        | 53.0        | 57.0                 | 92.9        | 40.5        | 85.9        |
|        | DesTSeg Zhang et al. (2023c)                     | 96.3        | 98.8        | 96.1                 | 92.6        | <b>75.8</b> | <b>71.3</b>          | 82.6        | <b>56.6</b> | <b>88.8</b> |

Table A13: Benchmarked results on MVTec 3D dataset [Bergmann et al. \(2022b\)](#) by the suggested metrics in Sec. 3.3.

|        | Method                                           | Image-level |             |                      | Pixel-level |             |                      | mAU-PRO     | mIoU-max    | mAD         |
|--------|--------------------------------------------------|-------------|-------------|----------------------|-------------|-------------|----------------------|-------------|-------------|-------------|
|        |                                                  | mAU-ROC     | mAP         | mF <sub>1</sub> -max | mAU-ROC     | mAP         | mF <sub>1</sub> -max |             |             |             |
| Aug.   | DRAEM <a href="#">Zavrtanik et al. (2021)</a>    | 49.2        | 79.4        | 89.0                 | 50.7        | 0.7         | 2.2                  | 23.4        | 1.1         | 45.9        |
|        | SimpleNet <a href="#">Liu et al. (2023)</a>      | 74.9        | 91.8        | 90.2                 | 94.0        | 14.4        | 21.4                 | 79.2        | 12.4        | 68.9        |
|        | CFA <a href="#">Lee et al. (2022)</a>            | 60.1        | 86.3        | 89.5                 | 52.0        | 7.0         | 11.9                 | 28.7        | 6.9         | 51.8        |
| Emb.   | CFLOW-AD <a href="#">Gudovskiy et al. (2022)</a> | 74.8        | 91.4        | 90.5                 | 96.9        | 21.6        | 26.8                 | 89.2        | 15.9        | 72.1        |
|        | PyramidalFlow <a href="#">Lei et al. (2023)</a>  | 52.5        | 80.8        | 88.6                 | 87.2        | 5.9         | 10.4                 | 68.0        | 5.6         | 58.4        |
|        | RD Deng & Li (2022)                              | 79.3        | 93.0        | 92.3                 | 98.3        | 28.6        | 35.4                 | 93.5        | 22.1        | 76.1        |
| Avg    | DiAD He et al. (2024b)                           | 78.8        | 91.3        | 91.7                 | 91.8        | 5.2         | 10.5                 | 75.1        | 5.6         | 63.5        |
|        | ViTAD Zhang et al. (2023a)                       | 78.7        | 93.3        | 91.5                 | 98.0        | 27.0        | 33.0                 | 91.3        | 20.2        | 75.1        |
|        | InvAD Zhang et al. (2024a)                       | <b>86.3</b> | <b>95.9</b> | <b>93.4</b>          | <b>98.7</b> | <b>36.2</b> | <b>41.1</b>          | <b>94.9</b> | <b>26.4</b> | <b>79.8</b> |
|        | InvAD-lite Zhang et al. (2024a)                  | 85.1        | 95.6        | 92.3                 | 98.4        | 34.4        | 39.0                 | 93.4        | 24.6        | 78.7        |
|        | MambaAD He et al. (2024a)                        | 85.8        | 95.5        | 92.6                 | 98.6        | 37.1        | 40.8                 | 94.1        | 26.0        | 79.5        |
|        | UniAD You et al. (2022)                          | 77.0        | 92.6        | 91.0                 | 96.8        | 23.7        | 30.6                 | 89.4        | 18.6        | 73.5        |
|        | RD++ Tien et al. (2023)                          | 80.1        | 93.5        | 92.2                 | 98.4        | 31.5        | 37.2                 | 93.6        | 23.4        | 76.9        |
| Hybrid | DesTSeg Zhang et al. (2023c)                     | 82.5        | 95.1        | 90.9                 | 82.1        | <b>43.8</b> | <b>45.2</b>          | 65.1        | <b>30.2</b> | 74.3        |

Table A14: Benchmarked results on MVTec LOCO dataset [Bergmann et al. \(2022a\)](#) by the suggested metrics in Sec. 3.3.

|        | Method                                           | Image-level |             |                      | Pixel-level |             |                      | mAU-PRO     | mIoU-max    | mAD         |
|--------|--------------------------------------------------|-------------|-------------|----------------------|-------------|-------------|----------------------|-------------|-------------|-------------|
|        |                                                  | mAU-ROC     | mAP         | mF <sub>1</sub> -max | mAU-ROC     | mAP         | mF <sub>1</sub> -max |             |             |             |
| Aug.   | DRAEM <a href="#">Zavrtanik et al. (2021)</a>    | 51.4        | 66.9        | 77.5                 | 48.0        | 5.2         | 10.5                 | 13.7        | 5.6         | 42.3        |
|        | SimpleNet <a href="#">Liu et al. (2023)</a>      | <b>81.8</b> | <b>89.1</b> | <b>82.5</b>          | 70.9        | 28.3        | 32.1                 | 61.2        | 20.9        | 66.3        |
|        | CFA <a href="#">Lee et al. (2022)</a>            | 60.6        | 73.7        | 77.6                 | 64.7        | 16.5        | 18.8                 | 36.4        | 10.8        | 52.4        |
| Emb.   | CFLOW-AD <a href="#">Gudovskiy et al. (2022)</a> | 76.0        | 85.0        | 79.9                 | 70.9        | 25.6        | 28.4                 | 70.0        | 17.7        | 64.5        |
|        | PyramidalFlow <a href="#">Lei et al. (2023)</a>  | 58.1        | 70.4        | 77.4                 | 55.5        | 16.8        | 14.4                 | 20.4        | 8.1         | 47.7        |
|        | RD Deng & Li (2022)                              | 73.7        | 84.6        | 79.4                 | 70.7        | 21.0        | 26.2                 | 67.5        | 15.9        | 62.8        |
| Avg    | DiAD He et al. (2024b)                           | 77.2        | 84.6        | 81.5                 | 72.1        | 18.6        | 25.3                 | 54.4        | 15.2        | 59.1        |
|        | ViTAD Zhang et al. (2023a)                       | 76.2        | 85.0        | 80.1                 | 73.2        | 27.9        | 30.6                 | 62.0        | 19.3        | 64.4        |
|        | InvAD Zhang et al. (2024a)                       | <b>82.3</b> | <b>89.9</b> | <b>82.4</b>          | <b>77.7</b> | <b>30.9</b> | <b>34.1</b>          | <b>72.8</b> | <b>22.4</b> | <b>69.4</b> |
|        | InvAD-lite Zhang et al. (2024a)                  | 78.0        | 86.8        | 81.6                 | 77.0        | 28.0        | 32.0                 | 69.4        | 20.4        | 66.9        |
|        | MambaAD He et al. (2024a)                        | 78.2        | 87.1        | 81.8                 | 77.5        | 28.0        | 32.9                 | 68.6        | 20.8        | 67.1        |
|        | UniAD You et al. (2022)                          | 78.7        | 87.1        | 80.9                 | 74.6        | <b>32.6</b> | <b>35.8</b>          | 70.7        | <b>23.4</b> | 67.8        |
|        | RD++ Tien et al. (2023)                          | 75.7        | 85.9        | 79.3                 | 72.1        | 24.2        | 28.5                 | 67.9        | 17.8        | 64.2        |
| Hybrid | DesTSeg Zhang et al. (2023c)                     | <b>81.2</b> | <b>88.6</b> | <b>81.8</b>          | 63.7        | 31.8        | 31.9                 | 59.2        | 21.1        | 65.3        |

Table A15: Benchmarked results on VisA dataset [Zou et al. \(2022\)](#) by the suggested metrics in [Sec. 3.3](#).

| Method |                                              | Image-level                                      |             |             | Pixel-level |             |             | mAU-PRO     | mIoU-max    | mAD         |             |
|--------|----------------------------------------------|--------------------------------------------------|-------------|-------------|-------------|-------------|-------------|-------------|-------------|-------------|-------------|
|        |                                              | mAU-ROC                                          | mAP         | mF1-max     | mAU-ROC     | mAP         | mF1-max     |             |             |             |             |
| Avg    | Aug.                                         | DRAEM <a href="#">Zavrtanik et al. (2021)</a>    | 56.2        | 64.6        | 74.9        | 45.0        | 0.7         | 1.8         | 16.0        | 0.9         | 40.6        |
|        |                                              | SimpleNet <a href="#">Liu et al. (2023)</a>      | 80.7        | 83.8        | 79.3        | 94.4        | 29.2        | 33.1        | 74.2        | 22.1        | 69.5        |
|        |                                              | RealNet <a href="#">Zhang et al. (2024c)</a>     | 79.2        | 84.8        | 78.3        | 65.4        | 29.2        | 27.9        | 33.9        | 17.4        | 59.9        |
|        | Emb.                                         | CFA <a href="#">Lee et al. (2022)</a>            | 67.1        | 73.8        | 75.3        | 83.0        | 13.7        | 18.7        | 48.7        | 11.3        | 56.5        |
|        |                                              | CFLOW-AD <a href="#">Gudovskiy et al. (2022)</a> | 87.2        | 89.5        | 85.1        | 97.8        | 34.2        | 37.2        | 87.3        | 24.9        | 75.7        |
|        |                                              | PyramidalFlow <a href="#">Lei et al. (2023)</a>  | 69.0        | 72.9        | 75.8        | 79.1        | 7.9         | 8.7         | 52.6        | 4.7         | 54.8        |
|        | Rec.                                         | RD <a href="#">Deng &amp; Li (2022)</a>          | 93.9        | 94.8        | 90.4        | 98.1        | 38.4        | 43.7        | 91.9        | 29.0        | 80.5        |
|        |                                              | DiAD <a href="#">He et al. (2024b)</a>           | 90.5        | 91.4        | 90.4        | 83.4        | 19.2        | 25.0        | 44.3        | 16.2        | 63.5        |
|        |                                              | ViTAD <a href="#">Zhang et al. (2023a)</a>       | 90.3        | 91.2        | 86.4        | 98.2        | 36.4        | 40.9        | 85.8        | 27.5        | 77.3        |
|        |                                              | InvAD <a href="#">Zhang et al. (2024a)</a>       | <b>95.6</b> | <b>96.0</b> | <b>92.3</b> | <b>99.0</b> | <b>43.7</b> | <b>46.9</b> | <b>93.0</b> | <b>32.6</b> | <b>82.6</b> |
|        |                                              | InvAD-lite <a href="#">Zhang et al. (2024a)</a>  | 95.3        | 95.8        | 91.0        | 98.7        | 41.2        | 44.9        | <b>93.2</b> | 30.6        | 81.8        |
|        |                                              | MambaAD <a href="#">He et al. (2024a)</a>        | 93.6        | 93.9        | 89.8        | 98.2        | 34.0        | 39.3        | 90.5        | 25.9        | 79.0        |
| Hybrid | UniAD <a href="#">You et al. (2022)</a>      | 91.4                                             | 93.3        | 87.5        | 98.5        | 35.3        | 40.2        | 89.0        | 26.5        | 78.2        |             |
|        | RD++ <a href="#">Tien et al. (2023)</a>      | 93.1                                             | 94.1        | 90.0        | 98.4        | 40.4        | 44.8        | 91.4        | 29.9        | 80.6        |             |
|        | DesTSeg <a href="#">Zhang et al. (2023c)</a> | 89.0                                             | 90.3        | 85.9        | 84.8        | 43.3        | 44.4        | 57.5        | 30.1        | 73.0        |             |

Table A16: Benchmarked results on BTAD dataset [Mishra et al. \(2021\)](#) by the suggested metrics in [Sec. 3.3](#).

| Method |                                              | Image-level                                      |             |             | Pixel-level |             |             | mAU-PRO     | mIoU-max    | mAD         |             |
|--------|----------------------------------------------|--------------------------------------------------|-------------|-------------|-------------|-------------|-------------|-------------|-------------|-------------|-------------|
|        |                                              | mAU-ROC                                          | mAP         | mF1-max     | mAU-ROC     | mAP         | mF1-max     |             |             |             |             |
| Avg    | Aug.                                         | DRAEM <a href="#">Zavrtanik et al. (2021)</a>    | 69.3        | 76.8        | 79.5        | 47.7        | 3.2         | 6.1         | 16.1        | 3.2         | 46.7        |
|        |                                              | SimpleNet <a href="#">Liu et al. (2023)</a>      | 94.0        | 97.9        | 93.9        | 96.2        | 41.0        | 43.7        | 69.6        | 28.1        | 78.9        |
|        |                                              | RealNet <a href="#">Zhang et al. (2024c)</a>     | 93.1        | 96.3        | 92.5        | 87.2        | 48.0        | 55.5        | 57.9        | 38.7        | 78.1        |
|        | Emb.                                         | CFA <a href="#">Lee et al. (2022)</a>            | 92.7        | 97.8        | 94.6        | 96.2        | 46.7        | 49.7        | 69.0        | 33.2        | 80.2        |
|        |                                              | CFLOW-AD <a href="#">Gudovskiy et al. (2022)</a> | 91.6        | 95.6        | 89.7        | 96.9        | 46.0        | 49.0        | 72.7        | 33.0        | 79.2        |
|        |                                              | PyramidalFlow <a href="#">Lei et al. (2023)</a>  | 85.3        | 81.7        | 79.0        | 76.1        | 27.7        | 23.4        | 43.1        | 15.0        | 62.3        |
|        | Rec.                                         | RD <a href="#">Deng &amp; Li (2022)</a>          | 94.1        | 96.8        | 93.8        | <b>98.0</b> | 57.1        | 58.0        | <b>79.9</b> | 41.0        | <b>84.1</b> |
|        |                                              | DiAD <a href="#">He et al. (2024b)</a>           | 90.2        | 88.3        | 92.6        | 91.9        | 20.5        | 27.0        | 70.3        | 16.0        | 68.7        |
|        |                                              | ViTAD <a href="#">Zhang et al. (2023a)</a>       | 94.0        | 97.0        | 93.7        | 97.6        | 58.3        | 56.5        | 72.8        | 39.9        | 83.1        |
|        |                                              | InvAD <a href="#">Zhang et al. (2024a)</a>       | <b>95.3</b> | 97.3        | 93.7        | 97.9        | <b>58.7</b> | <b>58.8</b> | 78.8        | <b>41.7</b> | <b>84.5</b> |
|        |                                              | InvAD-lite <a href="#">Zhang et al. (2024a)</a>  | 94.2        | 97.9        | 94.4        | 97.7        | 55.7        | 57.0        | 77.4        | 40.0        | 83.7        |
|        |                                              | MambaAD <a href="#">He et al. (2024a)</a>        | 92.9        | 96.2        | 93.0        | 97.6        | 51.2        | 55.1        | 77.3        | 38.2        | 82.2        |
| Hybrid | UniAD <a href="#">You et al. (2022)</a>      | 94.5                                             | <b>98.4</b> | <b>94.9</b> | 97.4        | 52.4        | 55.5        | 78.9        | 38.4        | 83.5        |             |
|        | RD++ <a href="#">Tien et al. (2023)</a>      | 94.5                                             | 97.6        | 94.3        | <b>98.0</b> | 57.7        | 58.2        | 78.9        | 41.2        | 84.3        |             |
|        | DesTSeg <a href="#">Zhang et al. (2023c)</a> | 93.5                                             | 96.7        | 93.8        | 94.8        | 39.1        | 38.5        | 72.9        | 24.6        | 78.0        |             |

Table A17: Benchmarked results on MPDD dataset [Jezek et al. \(2021\)](#) by the suggested metrics in [Sec. 3.3](#).

|        | Method                                       | Image-level                                      |      |         | Pixel-level |      |         | mAU-PRO | mIoU-max | mAD  |      |
|--------|----------------------------------------------|--------------------------------------------------|------|---------|-------------|------|---------|---------|----------|------|------|
|        |                                              | mAU-ROC                                          | mAP  | mF1-max | mAU-ROC     | mAP  | mF1-max |         |          |      |      |
| Avg    | Aug.                                         | DRAEM <a href="#">Zavrtanik et al. (2021)</a>    | 60.2 | 67.5    | 75.1        | 50.4 | 5.4     | 4.7     | 21.8     | 2.6  | 44.1 |
|        |                                              | SimpleNet <a href="#">Liu et al. (2023)</a>      | 90.6 | 94.1    | 89.7        | 97.1 | 33.6    | 35.7    | 90.0     | 25.6 | 77.8 |
|        |                                              | RealNet <a href="#">Zhang et al. (2024c)</a>     | 86.0 | 90.0    | 87.3        | 74.7 | 39.2    | 39.7    | 52.3     | 28.0 | 69.6 |
|        | Emb.                                         | CFA <a href="#">Lee et al. (2022)</a>            | 92.0 | 93.5    | 90.2        | 95.7 | 29.0    | 33.0    | 83.2     | 23.8 | 76.1 |
|        |                                              | CFLOW-AD <a href="#">Gudovskiy et al. (2022)</a> | 80.4 | 85.1    | 84.7        | 97.3 | 28.4    | 30.1    | 90.9     | 21.5 | 72.5 |
|        |                                              | PyramidalFlow <a href="#">Lei et al. (2023)</a>  | 72.5 | 76.2    | 77.6        | 89.0 | 12.4    | 15.8    | 68.5     | 9.1  | 60.9 |
|        | Rec.                                         | RD <a href="#">Deng &amp; Li (2022)</a>          | 90.3 | 92.8    | 90.5        | 98.3 | 39.6    | 40.6    | 95.2     | 30.2 | 79.8 |
|        |                                              | DiAD <a href="#">He et al. (2024b)</a>           | 85.8 | 89.2    | 86.5        | 91.4 | 15.3    | 19.2    | 66.1     | 12.0 | 64.8 |
|        |                                              | ViTAD <a href="#">Zhang et al. (2023a)</a>       | 87.4 | 90.8    | 87.0        | 97.8 | 34.6    | 37.8    | 92.9     | 28.0 | 77.1 |
|        |                                              | InvAD <a href="#">Zhang et al. (2024a)</a>       | 96.0 | 97.1    | 94.5        | 98.5 | 44.1    | 46.4    | 95.3     | 34.4 | 83.5 |
|        |                                              | InvAD-lite <a href="#">Zhang et al. (2024a)</a>  | 92.8 | 93.2    | 91.4        | 98.3 | 41.4    | 43.9    | 94.6     | 32.1 | 81.0 |
|        |                                              | MambaAD <a href="#">He et al. (2024a)</a>        | 89.2 | 93.1    | 90.3        | 97.7 | 33.5    | 38.6    | 92.8     | 27.2 | 78.3 |
| Hybrid | UniAD <a href="#">You et al. (2022)</a>      | 80.1                                             | 83.2 | 85.1    | 95.4        | 19.0 | 25.6    | 83.8    | 16.8     | 69.4 |      |
|        | RD++ <a href="#">Tien et al. (2023)</a>      | 90.6                                             | 93.3 | 90.0    | 98.4        | 42.8 | 43.0    | 95.3    | 32.7     | 80.6 |      |
|        | DesTSeg <a href="#">Zhang et al. (2023c)</a> | 92.6                                             | 91.8 | 92.8    | 90.8        | 30.6 | 32.9    | 78.3    | 24.1     | 75.3 |      |

Table A18: Benchmarked results on MAD\_Real dataset [Zhou et al. \(2024\)](#) by the suggested metrics in [Sec. 3.3](#).

| Method |                                              | Image-level                                      |      |         | Pixel-level |      |         | mAU-PRO | mIoU-max | mAD  |      |
|--------|----------------------------------------------|--------------------------------------------------|------|---------|-------------|------|---------|---------|----------|------|------|
|        |                                              | mAU-ROC                                          | mAP  | mF1-max | mAU-ROC     | mAP  | mF1-max |         |          |      |      |
| Avg    | Aug.                                         | DRAEM <a href="#">Zavrtanik et al. (2021)</a>    | 46.3 | 82.5    | 90.2        | 42.5 | 0.5     | 1.2     | 14.9     | 0.6  | 43.9 |
|        |                                              | SimpleNet <a href="#">Liu et al. (2023)</a>      | 36.1 | 77.0    | 89.6        | 77.2 | 2.6     | 6.3     | 48.9     | 3.3  | 50.7 |
|        |                                              | CFA <a href="#">Lee et al. (2022)</a>            | 48.5 | 81.2    | 91.4        | 83.3 | 10.4    | 15.0    | 64.1     | 8.6  | 58.5 |
|        | Emb.                                         | CFLOW-AD <a href="#">Gudovskiy et al. (2022)</a> | 57.4 | 85.9    | 91.2        | 90.9 | 10.8    | 15.3    | 74.1     | 8.8  | 63.0 |
|        |                                              | PyramidalFlow <a href="#">Lei et al. (2023)</a>  | 50.6 | 82.9    | 90.5        | 88.6 | 7.5     | 12.0    | 68.8     | 6.7  | 59.4 |
|        |                                              | RD <a href="#">Deng &amp; Li (2022)</a>          | 56.0 | 84.9    | 90.7        | 86.9 | 8.7     | 13.2    | 66.9     | 7.4  | 60.6 |
|        | Rec.                                         | DiAD <a href="#">He et al. (2024b)</a>           | 58.0 | 85.7    | 91.1        | 87.8 | 5.1     | 9.6     | 69.4     | 5.2  | 58.1 |
|        |                                              | ViTAD <a href="#">Zhang et al. (2023a)</a>       | 44.5 | 81.3    | 90.2        | 86.9 | 4.5     | 8.9     | 65.0     | 4.8  | 56.7 |
|        |                                              | InvAD <a href="#">Zhang et al. (2024a)</a>       | 63.5 | 86.5    | 92.7        | 91.6 | 18.9    | 24.2    | 77.2     | 14.9 | 66.9 |
|        |                                              | InvAD-lite <a href="#">Zhang et al. (2024a)</a>  | 57.3 | 84.8    | 91.9        | 90.8 | 11.4    | 16.3    | 74.7     | 9.5  | 63.1 |
|        |                                              | MambaAD <a href="#">He et al. (2024a)</a>        | 54.7 | 83.1    | 92.2        | 90.8 | 13.1    | 19.2    | 74.7     | 11.4 | 63.1 |
|        |                                              | UniAD <a href="#">You et al. (2022)</a>          | 45.4 | 80.3    | 90.8        | 87.8 | 6.4     | 11.6    | 68.3     | 6.4  | 57.8 |
| Hybrid | RD++ <a href="#">Tien et al. (2023)</a>      | 52.3                                             | 84.0 | 91.3    | 88.7        | 9.3  | 14.4    | 70.4    | 8.2      | 60.8 |      |
|        | DesTSeg <a href="#">Zhang et al. (2023c)</a> | 36.1                                             | 77.9 | 89.8    | 82.5        | 3.2  | 6.0     | 52.7    | 3.2      | 52.0 |      |



Table A19: Benchmarked results on MAD\_Sim dataset [Zhou et al. \(2024\)](#) by the suggested metrics in Sec. 3.3.

|        | Method | Image-level                                      |             |                      | Pixel-level |             |                      | mAU-PRO     | mIoU-max    | mAD         |
|--------|--------|--------------------------------------------------|-------------|----------------------|-------------|-------------|----------------------|-------------|-------------|-------------|
|        |        | mAU-ROC                                          | mAP         | mF <sub>1</sub> -max | mAU-ROC     | mAP         | mF <sub>1</sub> -max |             |             |             |
| Avg    | Aug.   | DRAEM <a href="#">Zavrtanik et al. (2021)</a>    | 48.8        | 88.1                 | 93.8        | 47.9        | 0.7                  | 1.5         | 20.0        | 47.2        |
|        |        | SimpleNet <a href="#">Liu et al. (2023)</a>      | 51.5        | 88.6                 | 93.8        | 86.1        | 2.3                  | 4.5         | 63.9        | 58.6        |
|        | Emb.   | CFA <a href="#">Lee et al. (2022)</a>            | 55.7        | 91.1                 | 93.8        | 71.8        | 3.7                  | 7.7         | 45.3        | 56.2        |
|        |        | CFLOW-AD <a href="#">Gudovskiy et al. (2022)</a> | 56.9        | 90.9                 | 93.8        | 86.9        | 3.4                  | 5.1         | 63.7        | 60.2        |
|        |        | PyramidalFlow <a href="#">Lei et al. (2023)</a>  | 49.0        | 88.1                 | 93.8        | 84.4        | 2.4                  | 5.0         | 62.7        | 57.8        |
|        | Rec.   | RD <a href="#">Deng &amp; Li (2022)</a>          | 57.9        | 91.3                 | 93.8        | 88.3        | 4.4                  | 8.2         | 73.7        | 62.3        |
|        |        | DiAD <a href="#">He et al. (2024b)</a>           | 65.6        | 93.4                 | <b>94.1</b> | 87.7        | 4.4                  | 8.8         | 61.4        | 59.4        |
|        |        | ViTAD <a href="#">Zhang et al. (2023a)</a>       | 59.0        | 91.4                 | 93.8        | 89.0        | 4.8                  | 9.3         | 73.6        | 62.8        |
|        |        | InvAD <a href="#">Zhang et al. (2024a)</a>       | <b>70.4</b> | <b>94.5</b>          | <b>94.0</b> | <b>90.7</b> | <b>8.9</b>           | <b>15.3</b> | <b>79.1</b> | <b>67.4</b> |
|        |        | InvAD-lite <a href="#">Zhang et al. (2024a)</a>  | 65.3        | 93.4                 | 93.9        | 89.7        | 6.6                  | 11.4        | 76.4        | 65.1        |
|        |        | MambaAD <a href="#">He et al. (2024a)</a>        | 61.4        | 92.4                 | 93.8        | 88.3        | 4.8                  | 9.0         | 73.0        | 63.2        |
| Hybrid | Hybrid | UniAD <a href="#">You et al. (2022)</a>          | 59.4        | 91.5                 | 93.8        | 89.0        | 4.4                  | 8.4         | 74.6        | 62.8        |
|        |        | RD++ <a href="#">Tien et al. (2023)</a>          | 58.6        | 91.7                 | 93.8        | 88.3        | 4.4                  | 8.1         | 73.2        | 62.4        |
|        |        | DesTSeg <a href="#">Zhang et al. (2023c)</a>     | 59.2        | 91.9                 | 93.8        | 56.8        | 5.7                  | 8.6         | 41.8        | 54.9        |

Table A20: Benchmarked results on Uni-Medical dataset [Zhang et al. \(2023a\)](#) by the suggested metrics in Sec. 3.3.

|        | Method | Image-level                                      |             |                      | Pixel-level |             |                      | mAU-PRO     | mIoU-max    | mAD  |
|--------|--------|--------------------------------------------------|-------------|----------------------|-------------|-------------|----------------------|-------------|-------------|------|
|        |        | mAU-ROC                                          | mAP         | mF <sub>1</sub> -max | mAU-ROC     | mAP         | mF <sub>1</sub> -max |             |             |      |
| Avg    | Aug.   | DRAEM <a href="#">Zavrtanik et al. (2021)</a>    | 58.5        | 63.2                 | 71.7        | 32.5        | 2.0                  | 6.1         | 9.1         | 38.4 |
|        |        | SimpleNet <a href="#">Liu et al. (2023)</a>      | 72.5        | 75.3                 | 76.7        | 94.9        | 35.9                 | 37.0        | 79.2        | 68.3 |
|        | Emb.   | CFA <a href="#">Lee et al. (2022)</a>            | 56.3        | 62.8                 | 70.4        | 38.1        | 4.8                  | 6.6         | 8.9         | 38.9 |
|        |        | CFLOW-AD <a href="#">Gudovskiy et al. (2022)</a> | 79.0        | 78.5                 | 77.3        | 95.4        | 39.6                 | 26.3        | 81.7        | 69.5 |
|        |        | PyramidalFlow <a href="#">Lei et al. (2023)</a>  | 60.0        | 62.8                 | 71.9        | 82.2        | 8.8                  | 14.9        | 46.9        | 51.5 |
|        | Rec.   | RD <a href="#">Deng &amp; Li (2022)</a>          | 76.4        | 75.8                 | 77.9        | 96.4        | 38.9                 | 39.8        | 86.5        | 71.1 |
|        |        | DiAD <a href="#">He et al. (2024b)</a>           | <b>82.9</b> | 81.9                 | 79.4        | 96.0        | 35.9                 | 38.2        | 85.4        | 71.4 |
|        |        | ViTAD <a href="#">Zhang et al. (2023a)</a>       | 81.5        | 80.6                 | 80.1        | 97.0        | 46.8                 | 46.9        | 86.5        | 75.0 |
|        |        | InvAD <a href="#">Zhang et al. (2024a)</a>       | 81.3        | 80.0                 | 79.9        | <b>97.2</b> | 45.4                 | 45.5        | <b>89.0</b> | 74.8 |
|        |        | InvAD-lite <a href="#">Zhang et al. (2024a)</a>  | 77.6        | 77.2                 | 79.3        | 96.2        | 38.7                 | 39.7        | 85.7        | 71.6 |
|        |        | MambaAD <a href="#">He et al. (2024a)</a>        | 82.3        | 78.9                 | <b>81.3</b> | 96.7        | 43.0                 | 46.1        | 87.9        | 74.6 |
| Hybrid | Hybrid | UniAD <a href="#">You et al. (2022)</a>          | 80.4        | 76.6                 | 77.5        | 96.5        | 39.0                 | 41.3        | 85.8        | 71.9 |
|        |        | RD++ <a href="#">Tien et al. (2023)</a>          | 77.2        | 76.1                 | 78.5        | 96.7        | 41.0                 | 41.9        | 87.4        | 72.0 |
|        |        | DesTSeg <a href="#">Zhang et al. (2023c)</a>     | 82.0        | <b>85.0</b>          | 79.7        | 83.2        | <b>50.6</b>          | <b>50.5</b> | 66.1        | 72.4 |



## C DETAILED QUANTITATIVE RESULTS ON MVTEC AD DATASET UNDER 100 EPOCHS

Table A21: Benchmarked results on MVTEC AD dataset [Bergmann et al. \(2019\)](#) by the suggested metrics in Sec. 3.3.

|         | Method | Image-level                                      |             |                      | Pixel-level |             |                      | mAU-PRO     | mIoU-max    | mAD         |
|---------|--------|--------------------------------------------------|-------------|----------------------|-------------|-------------|----------------------|-------------|-------------|-------------|
|         |        | mAU-ROC                                          | mAP         | mF <sub>1</sub> -max | mAU-ROC     | mAP         | mF <sub>1</sub> -max |             |             |             |
| bottle  | Aug.   | DRAEM <a href="#">Zavrtanik et al. (2021)</a>    | 49.4        | 74.0                 | 86.3        | 57.8        | 6.5                  | 13.2        | 17.3        | 46.8        |
|         |        | SimpleNet <a href="#">Liu et al. (2023)</a>      | <b>100.</b> | <b>100.</b>          | <b>100.</b> | 97.4        | 57.3                 | 65.9        | 89.1        | 88.7        |
|         |        | RealNet <a href="#">Zhang et al. (2024c)</a>     | 95.6        | 98.8                 | 95.1        | 69.8        | 53.9                 | 46.6        | 60.9        | 77.2        |
|         | Emb.   | CFA <a href="#">Lee et al. (2022)</a>            | 64.2        | 87.4                 | 86.3        | 65.3        | 11.0                 | 15.1        | 35.5        | 8.2         |
|         |        | PatchCore <a href="#">Roth et al. (2022)</a>     | <b>100.</b> | <b>100.</b>          | <b>100.</b> | <b>98.9</b> | 79.0                 | <b>77.1</b> | <b>96.1</b> | 62.7        |
|         |        | CFLOW-AD <a href="#">Gudovskiy et al. (2022)</a> | 99.9        | <b>100.</b>          | 99.2        | 97.4        | 61.8                 | 63.6        | 91.9        | 46.6        |
|         |        | PyramidalFlow <a href="#">Lei et al. (2023)</a>  | 77.1        | 93.1                 | 86.3        | 77.7        | 16.9                 | 23.9        | 40.9        | 13.6        |
|         |        | RD <a href="#">Deng &amp; Li (2022)</a>          | 40.6        | 77.5                 | 86.3        | 93.4        | 29.6                 | 48.5        | 80.4        | 32.0        |
|         | Rec.   | DiAD <a href="#">He et al. (2024b)</a>           | 97.7        | 99.1                 | 99.2        | 93.5        | 45.7                 | 49.5        | 76.0        | 32.9        |
|         |        | ViTAD <a href="#">Zhang et al. (2023a)</a>       | <b>100.</b> | <b>100.</b>          | <b>100.</b> | <b>98.8</b> | <b>79.9</b>          | <b>75.8</b> | <b>94.9</b> | <b>61.0</b> |
|         |        | InvAD <a href="#">Zhang et al. (2024a)</a>       | <b>100.</b> | <b>100.</b>          | <b>100.</b> | 98.6        | 75.2                 | 73.6        | <b>95.7</b> | 58.2        |
|         |        | InvAD-lite <a href="#">Zhang et al. (2024a)</a>  | <b>100.</b> | <b>100.</b>          | <b>100.</b> | 98.4        | 75.2                 | 73.5        | <b>95.7</b> | 58.1        |
|         |        | MambaAD <a href="#">He et al. (2024a)</a>        | 99.8        | <b>100.</b>          | 99.2        | 98.7        | <b>79.7</b>          | 75.7        | <b>96.0</b> | 60.9        |
|         | Hybrid | UniAD <a href="#">You et al. (2022)</a>          | 99.4        | <b>99.8</b>          | <b>98.4</b> | 98.1        | 73.5                 | 70.7        | <b>95.3</b> | 54.7        |
|         |        | RD++ <a href="#">Tien et al. (2023)</a>          | 99.8        | <b>99.9</b>          | <b>98.4</b> | 98.2        | 72.5                 | 71.6        | 95.0        | 55.8        |
|         |        | DesTSeg <a href="#">Zhang et al. (2023c)</a>     | <b>100.</b> | <b>100.</b>          | <b>100.</b> | 94.9        | <b>87.2</b>          | <b>81.1</b> | 91.8        | <b>68.3</b> |
|         | Aug.   | DRAEM <a href="#">Zavrtanik et al. (2021)</a>    | 50.2        | 61.7                 | 76.0        | 55.6        | 3.2                  | 5.7         | 16.6        | 2.9         |
|         |        | SimpleNet <a href="#">Liu et al. (2023)</a>      | 97.1        | 98.3                 | 93.9        | <b>96.6</b> | <b>48.5</b>          | <b>55.0</b> | 86.0        | 37.9        |
|         |        | RealNet <a href="#">Zhang et al. (2024c)</a>     | 70.0        | 83.0                 | 76.0        | 61.5        | 23.5                 | 25.9        | 33.3        | 14.9        |
|         | Emb.   | CFA <a href="#">Lee et al. (2022)</a>            | 50.3        | 59.9                 | 76.3        | 52.8        | 3.7                  | 7.5         | 22.3        | 3.9         |
|         |        | PatchCore <a href="#">Roth et al. (2022)</a>     | <b>99.8</b> | <b>99.9</b>          | <b>99.5</b> | <b>97.7</b> | <b>51.6</b>          | <b>55.2</b> | <b>93.6</b> | <b>38.1</b> |
|         |        | CFLOW-AD <a href="#">Gudovskiy et al. (2022)</a> | 89.6        | 93.7                 | 86.0        | 89.8        | 27.3                 | 33.3        | 78.0        | 20.0        |
|         |        | PyramidalFlow <a href="#">Lei et al. (2023)</a>  | 58.2        | 73.7                 | 76.0        | 82.8        | 19.0                 | 16.4        | 41.6        | 8.9         |
|         |        | RD <a href="#">Deng &amp; Li (2022)</a>          | 81.9        | 88.7                 | 81.4        | 84.0        | 26.6                 | 34.4        | 77.3        | 20.8        |
|         | Rec.   | DiAD <a href="#">He et al. (2024b)</a>           | 88.5        | 94.3                 | 88.9        | 90.7        | 27.0                 | 33.3        | 63.9        | 20.0        |
|         |        | ViTAD <a href="#">Zhang et al. (2023a)</a>       | 98.8        | <b>99.3</b>          | <b>96.3</b> | 96.3        | 43.6                 | 46.8        | <b>90.6</b> | 30.6        |
|         |        | InvAD <a href="#">Zhang et al. (2024a)</a>       | 97.9        | 98.7                 | 95.1        | <b>97.1</b> | 46.7                 | 50.8        | <b>92.1</b> | 34.0        |
|         |        | InvAD-lite <a href="#">Zhang et al. (2024a)</a>  | 97.0        | 98.2                 | 94.0        | 90.9        | 39.4                 | 47.5        | 87.7        | 31.2        |
|         |        | MambaAD <a href="#">He et al. (2024a)</a>        | 99.3        | 99.6                 | 97.4        | 95.2        | 42.0                 | 47.9        | 90.4        | 31.5        |
|         | Hybrid | UniAD <a href="#">You et al. (2022)</a>          | 93.0        | 95.7                 | 89.3        | 96.1        | 45.0                 | 50.7        | 84.9        | 34.0        |
|         |        | RD++ <a href="#">Tien et al. (2023)</a>          | 93.7        | 96.3                 | 91.3        | 93.2        | 37.7                 | 45.1        | 86.8        | 29.1        |
|         |        | DesTSeg <a href="#">Zhang et al. (2023c)</a>     | 97.5        | 98.7                 | 94.6        | 95.2        | <b>67.2</b>          | <b>64.0</b> | 85.1        | <b>47.1</b> |
| capsule | Aug.   | DRAEM <a href="#">Zavrtanik et al. (2021)</a>    | 58.0        | 86.3                 | 90.5        | 48.3        | 0.8                  | 1.8         | 14.8        | 0.9         |
|         |        | SimpleNet <a href="#">Liu et al. (2023)</a>      | 85.4        | 96.7                 | 92.7        | 98.1        | 36.9                 | 46.8        | 87.1        | 30.6        |
|         |        | RealNet <a href="#">Zhang et al. (2024c)</a>     | 64.4        | 90.3                 | 90.5        | 54.6        | 23.7                 | 12.1        | 23.4        | 6.4         |
|         | Emb.   | CFA <a href="#">Lee et al. (2022)</a>            | 40.8        | 82.5                 | 90.5        | 27.0        | 0.6                  | 1.8         | 7.0         | 0.9         |
|         |        | PatchCore <a href="#">Roth et al. (2022)</a>     | <b>99.2</b> | <b>99.8</b>          | <b>98.6</b> | <b>99.0</b> | <b>49.0</b>          | <b>52.9</b> | <b>95.7</b> | <b>35.9</b> |
|         |        | CFLOW-AD <a href="#">Gudovskiy et al. (2022)</a> | 86.1        | 96.7                 | 93.4        | 98.5        | 41.0                 | 44.2        | 92.8        | 28.4        |
|         |        | PyramidalFlow <a href="#">Lei et al. (2023)</a>  | 55.6        | 87.0                 | 90.5        | 90.3        | 13.5                 | 19.6        | 57.3        | 10.9        |
|         |        | RD <a href="#">Deng &amp; Li (2022)</a>          | 98.4        | <b>99.7</b>          | <b>96.9</b> | 98.8        | 45.4                 | 51.8        | <b>96.1</b> | 34.9        |
|         | Rec.   | DiAD <a href="#">He et al. (2024b)</a>           | 88.6        | 97.7                 | 91.8        | 90.9        | 16.0                 | 23.5        | 54.5        | 13.3        |
|         |        | ViTAD <a href="#">Zhang et al. (2023a)</a>       | 95.3        | <b>99.0</b>          | 95.9        | 98.2        | 42.0                 | 47.1        | 92.4        | 30.8        |
|         |        | InvAD <a href="#">Zhang et al. (2024a)</a>       | 94.3        | 98.7                 | 96.0        | <b>98.9</b> | 46.7                 | 50.8        | 95.5        | 34.0        |
|         |        | InvAD-lite <a href="#">Zhang et al. (2024a)</a>  | 93.9        | 98.6                 | 94.8        | 98.4        | 42.2                 | 47.4        | 94.4        | 31.1        |
|         |        | MambaAD <a href="#">He et al. (2024a)</a>        | 91.8        | 98.2                 | 93.2        | 98.3        | 43.5                 | 47.8        | 93.0        | 31.4        |
|         | Hybrid | UniAD <a href="#">You et al. (2022)</a>          | 69.8        | 90.4                 | 91.6        | 97.5        | 32.6                 | 36.9        | 86.9        | 22.6        |
|         |        | RD++ <a href="#">Tien et al. (2023)</a>          | 98.3        | <b>99.7</b>          | <b>97.3</b> | <b>99.0</b> | <b>47.1</b>          | <b>52.1</b> | <b>96.3</b> | <b>35.3</b> |
|         |        | DesTSeg <a href="#">Zhang et al. (2023c)</a>     | 90.3        | 97.6                 | 94.6        | 89.3        | <b>56.4</b>          | <b>58.1</b> | 60.6        | <b>41.0</b> |
|         | Aug.   | DRAEM <a href="#">Zavrtanik et al. (2021)</a>    | 66.7        | 87.4                 | 87.0        | 51.9        | 1.7                  | 3.2         | 16.6        | 1.6         |
|         |        | SimpleNet <a href="#">Liu et al. (2023)</a>      | 97.1        | 99.1                 | 94.6        | 97.7        | 42.8                 | 46.9        | 90.0        | 30.6        |
|         |        | RealNet <a href="#">Zhang et al. (2024c)</a>     | 96.5        | 99.1                 | 96.0        | 89.2        | <b>69.0</b>          | <b>64.3</b> | 84.0        | 47.4        |
|         | Emb.   | CFA <a href="#">Lee et al. (2022)</a>            | 47.5        | 78.0                 | 86.4        | 50.9        | 7.0                  | 11.4        | 31.9        | 6.1         |
|         |        | PatchCore <a href="#">Roth et al. (2022)</a>     | 98.4        | 99.5                 | <b>97.8</b> | 99.1        | <b>66.4</b>          | <b>64.6</b> | 95.2        | 47.7        |
|         |        | CFLOW-AD <a href="#">Gudovskiy et al. (2022)</a> | 99.2        | <b>99.8</b>          | 97.2        | 98.8        | 55.9                 | 59.4        | 94.3        | 42.3        |
|         |        | PyramidalFlow <a href="#">Lei et al. (2023)</a>  | 44.6        | 73.5                 | 86.4        | 79.2        | 8.5                  | 15.1        | 52.3        | 8.2         |
|         |        | RD <a href="#">Deng &amp; Li (2022)</a>          | 99.0        | <b>99.7</b>          | <b>98.3</b> | <b>99.1</b> | 59.8                 | 61.1        | 95.8        | 44.0        |
|         | Rec.   | DiAD <a href="#">He et al. (2024b)</a>           | 64.5        | 87.8                 | 86.4        | 87.9        | 17.0                 | 26.5        | 67.0        | 15.3        |
|         |        | ViTAD <a href="#">Zhang et al. (2023a)</a>       | 99.5        | <b>99.9</b>          | <b>99.4</b> | 99.0        | 59.8                 | 64.1        | 94.7        | 47.2        |
|         |        | InvAD <a href="#">Zhang et al. (2024a)</a>       | 98.6        | 99.6                 | 97.2        | <b>99.1</b> | 60.8                 | 62.1        | 95.8        | 45.1        |
|         |        | InvAD-lite <a href="#">Zhang et al. (2024a)</a>  | <b>99.8</b> | <b>99.9</b>          | <b>99.4</b> | <b>99.1</b> | 58.0                 | 61.4        | 96.4        | 44.3        |
|         |        | MambaAD <a href="#">He et al. (2024a)</a>        | <b>99.8</b> | <b>99.9</b>          | <b>99.4</b> | <b>99.2</b> | 64.0                 | 63.8        | <b>97.3</b> | 46.8        |
| carpet  | Hybrid | UniAD <a href="#">You et al. (2022)</a>          | <b>99.8</b> | <b>99.9</b>          | <b>99.4</b> | 98.5        | 53.6                 | 55.6        | <b>95.9</b> | 38.5        |
|         |        | RD++ <a href="#">Tien et al. (2023)</a>          | 97.6        | 99.3                 | 96.0        | 98.9        | 57.2                 | 58.5        | 94.8        | 41.3        |
|         |        | DesTSeg <a href="#">Zhang et al. (2023c)</a>     | 95.9        | 98.7                 | 95.0        | 95.7        | <b>68.7</b>          | <b>64.9</b> | 93.4        | <b>48.0</b> |

Table A22: Benchmarked results on MVTec AD dataset [Bergmann et al. \(2019\)](#) by the suggested metrics in Sec. 3.3.

|           | Method | Image-level                                      |      |                      | Pixel-level |      |                      | mAU-PRO | mIoU-max | mAD  |      |
|-----------|--------|--------------------------------------------------|------|----------------------|-------------|------|----------------------|---------|----------|------|------|
|           |        | mAU-ROC                                          | mAP  | mF <sub>1</sub> -max | mAU-ROC     | mAP  | mF <sub>1</sub> -max |         |          |      |      |
| grid      | Aug.   | DRAEM <a href="#">Zavrtanik et al. (2021)</a>    | 47.3 | 72.2                 | 84.4        | 46.4 | 0.6                  | 1.4     | 13.5     | 0.7  | 41.7 |
|           |        | SimpleNet <a href="#">Liu et al. (2023)</a>      | 98.2 | 99.5                 | 98.2        | 96.9 | 26.4                 | 33.0    | 88.3     | 19.7 | 79.9 |
|           |        | RealNet <a href="#">Zhang et al. (2024c)</a>     | 97.2 | 99.2                 | 96.4        | 82.6 | 41.2                 | 45.7    | 77.7     | 29.7 | 79.7 |
|           | Emb.   | CFA <a href="#">Lee et al. (2022)</a>            | 51.1 | 76.4                 | 84.4        | 39.9 | 0.5                  | 1.4     | 5.2      | 0.7  | 41.2 |
|           |        | PatchCore <a href="#">Roth et al. (2022)</a>     | 99.4 | 99.8                 | 98.2        | 98.9 | 40.8                 | 44.3    | 94.0     | 28.4 | 84.3 |
|           |        | CFLOW-AD <a href="#">Gudovskiy et al. (2022)</a> | 86.7 | 95.5                 | 88.0        | 92.9 | 18.2                 | 25.1    | 81.0     | 14.4 | 72.2 |
|           |        | PyramidalFlow <a href="#">Lei et al. (2023)</a>  | 75.5 | 89.9                 | 85.1        | 85.7 | 9.8                  | 16.6    | 66.9     | 9.0  | 64.1 |
|           |        | RD <a href="#">Deng &amp; Li (2022)</a>          | 98.7 | 99.6                 | 97.4        | 99.2 | 47.6                 | 48.8    | 97.5     | 32.3 | 85.9 |
|           | Rec.   | DiAD <a href="#">He et al. (2024b)</a>           | 99.0 | 99.7                 | 98.2        | 85.7 | 4.0                  | 9.5     | 56.7     | 5.0  | 64.7 |
|           |        | ViTAD <a href="#">Zhang et al. (2023a)</a>       | 99.6 | 99.9                 | 99.1        | 98.6 | 31.3                 | 36.5    | 95.8     | 22.3 | 82.5 |
|           |        | InvAD <a href="#">Zhang et al. (2024a)</a>       | 99.5 | 99.8                 | 97.4        | 99.1 | 45.1                 | 46.6    | 97.1     | 30.4 | 85.4 |
|           |        | InvAD-lite <a href="#">Zhang et al. (2024a)</a>  | 100. | 100.                 | 100.        | 99.2 | 49.4                 | 49.5    | 97.7     | 32.9 | 87.0 |
|           |        | MambaAD <a href="#">He et al. (2024a)</a>        | 99.8 | 99.9                 | 99.1        | 98.9 | 48.4                 | 48.5    | 96.9     | 32.0 | 86.4 |
|           | Hybrid | UniAD <a href="#">You et al. (2022)</a>          | 99.0 | 99.7                 | 98.2        | 94.8 | 26.6                 | 34.0    | 89.3     | 20.5 | 80.1 |
|           |        | RD++ <a href="#">Tien et al. (2023)</a>          | 99.2 | 99.7                 | 97.3        | 99.2 | 46.8                 | 50.2    | 97.0     | 33.5 | 86.0 |
|           |        | DesTSeg <a href="#">Zhang et al. (2023c)</a>     | 99.6 | 99.9                 | 98.2        | 96.6 | 47.7                 | 52.0    | 91.9     | 35.1 | 85.6 |
| hazelnut  | Aug.   | DRAEM <a href="#">Zavrtanik et al. (2021)</a>    | 45.7 | 68.1                 | 77.8        | 41.1 | 3.6                  | 4.2     | 12.4     | 2.1  | 39.6 |
|           |        | SimpleNet <a href="#">Liu et al. (2023)</a>      | 100. | 100.                 | 100.        | 98.1 | 49.0                 | 52.4    | 93.9     | 35.5 | 86.7 |
|           |        | RealNet <a href="#">Zhang et al. (2024c)</a>     | 100. | 100.                 | 100.        | 77.5 | 44.2                 | 48.9    | 75.4     | 32.4 | 80.8 |
|           | Emb.   | CFA <a href="#">Lee et al. (2022)</a>            | 51.8 | 67.7                 | 78.0        | 45.7 | 4.5                  | 8.3     | 17.3     | 4.3  | 42.4 |
|           |        | PatchCore <a href="#">Roth et al. (2022)</a>     | 100. | 100.                 | 100.        | 99.0 | 61.2                 | 63.6    | 96.2     | 46.6 | 90.0 |
|           |        | CFLOW-AD <a href="#">Gudovskiy et al. (2022)</a> | 99.9 | 100.                 | 99.3        | 98.5 | 59.1                 | 57.9    | 95.6     | 40.7 | 88.8 |
|           |        | PyramidalFlow <a href="#">Lei et al. (2023)</a>  | 92.1 | 95.0                 | 91.2        | 92.7 | 33.2                 | 36.9    | 84.2     | 22.6 | 77.3 |
|           |        | RD <a href="#">Deng &amp; Li (2022)</a>          | 100. | 100.                 | 100.        | 98.7 | 58.6                 | 59.6    | 96.5     | 42.5 | 89.2 |
|           | Rec.   | DiAD <a href="#">He et al. (2024b)</a>           | 96.9 | 98.6                 | 96.3        | 95.3 | 27.2                 | 36.9    | 91.3     | 22.6 | 76.1 |
|           |        | ViTAD <a href="#">Zhang et al. (2023a)</a>       | 100. | 100.                 | 100.        | 99.0 | 64.8                 | 64.3    | 95.6     | 47.4 | 90.5 |
|           |        | InvAD <a href="#">Zhang et al. (2024a)</a>       | 100. | 100.                 | 100.        | 99.0 | 61.8                 | 62.6    | 96.6     | 45.5 | 90.0 |
|           |        | InvAD-lite <a href="#">Zhang et al. (2024a)</a>  | 99.7 | 99.8                 | 99.3        | 98.9 | 58.4                 | 63.0    | 95.7     | 46.0 | 89.3 |
|           |        | MambaAD <a href="#">He et al. (2024a)</a>        | 100. | 100.                 | 100.        | 99.1 | 67.0                 | 66.1    | 95.3     | 49.4 | 90.9 |
|           | Hybrid | UniAD <a href="#">You et al. (2022)</a>          | 99.6 | 99.8                 | 98.6        | 98.0 | 53.0                 | 53.9    | 93.7     | 36.9 | 87.0 |
|           |        | RD++ <a href="#">Tien et al. (2023)</a>          | 94.8 | 96.2                 | 92.0        | 98.8 | 59.1                 | 58.7    | 96.4     | 41.6 | 86.3 |
|           |        | DesTSeg <a href="#">Zhang et al. (2023c)</a>     | 99.6 | 99.8                 | 98.6        | 96.8 | 84.7                 | 80.2    | 92.9     | 66.9 | 94.0 |
| leather   | Aug.   | DRAEM <a href="#">Zavrtanik et al. (2021)</a>    | 53.2 | 81.4                 | 85.2        | 45.4 | 1.1                  | 2.9     | 16.3     | 1.5  | 44.8 |
|           |        | SimpleNet <a href="#">Liu et al. (2023)</a>      | 100. | 100.                 | 100.        | 98.5 | 27.8                 | 33.9    | 95.5     | 20.4 | 82.0 |
|           |        | RealNet <a href="#">Zhang et al. (2024c)</a>     | 100. | 100.                 | 100.        | 97.9 | 70.4                 | 68.0    | 98.0     | 51.5 | 91.8 |
|           | Emb.   | CFA <a href="#">Lee et al. (2022)</a>            | 62.2 | 82.7                 | 87.8        | 65.4 | 7.7                  | 14.8    | 40.7     | 8.0  | 54.9 |
|           |        | PatchCore <a href="#">Roth et al. (2022)</a>     | 100. | 100.                 | 100.        | 99.4 | 52.1                 | 51.2    | 97.8     | 34.5 | 87.6 |
|           |        | CFLOW-AD <a href="#">Gudovskiy et al. (2022)</a> | 100. | 100.                 | 100.        | 99.2 | 45.0                 | 46.1    | 98.1     | 30.0 | 86.0 |
|           |        | PyramidalFlow <a href="#">Lei et al. (2023)</a>  | 67.2 | 77.3                 | 89.9        | 87.7 | 6.4                  | 15.2    | 74.0     | 8.2  | 62.0 |
|           |        | RD <a href="#">Deng &amp; Li (2022)</a>          | 100. | 100.                 | 100.        | 99.3 | 39.1                 | 46.6    | 97.9     | 30.4 | 85.4 |
|           | Rec.   | DiAD <a href="#">He et al. (2024b)</a>           | 97.6 | 99.1                 | 95.8        | 90.6 | 5.9                  | 11.9    | 68.3     | 6.3  | 67.0 |
|           |        | ViTAD <a href="#">Zhang et al. (2023a)</a>       | 100. | 100.                 | 100.        | 99.5 | 51.1                 | 55.8    | 98.0     | 38.7 | 88.0 |
|           |        | InvAD <a href="#">Zhang et al. (2024a)</a>       | 100. | 100.                 | 100.        | 99.5 | 54.3                 | 54.3    | 98.1     | 37.3 | 88.3 |
|           |        | InvAD-lite <a href="#">Zhang et al. (2024a)</a>  | 100. | 100.                 | 100.        | 99.3 | 45.6                 | 47.4    | 98.5     | 31.0 | 86.3 |
|           |        | MambaAD <a href="#">He et al. (2024a)</a>        | 100. | 100.                 | 100.        | 99.3 | 50.6                 | 50.4    | 98.7     | 33.7 | 87.4 |
|           | Hybrid | UniAD <a href="#">You et al. (2022)</a>          | 100. | 100.                 | 100.        | 99.1 | 41.1                 | 43.5    | 98.3     | 27.8 | 85.2 |
|           |        | RD++ <a href="#">Tien et al. (2023)</a>          | 100. | 100.                 | 100.        | 99.3 | 40.4                 | 47.1    | 97.5     | 30.8 | 85.5 |
|           |        | DesTSeg <a href="#">Zhang et al. (2023c)</a>     | 100. | 100.                 | 100.        | 99.3 | 79.6                 | 71.9    | 98.4     | 56.2 | 93.7 |
| metal_nut | Aug.   | DRAEM <a href="#">Zavrtanik et al. (2021)</a>    | 58.1 | 82.5                 | 89.4        | 38.8 | 8.9                  | 21.3    | 11.0     | 11.9 | 48.3 |
|           |        | SimpleNet <a href="#">Liu et al. (2023)</a>      | 99.0 | 99.8                 | 97.8        | 97.7 | 82.2                 | 79.2    | 87.6     | 65.6 | 92.8 |
|           |        | RealNet <a href="#">Zhang et al. (2024c)</a>     | 78.6 | 94.7                 | 89.4        | 52.5 | 32.3                 | 21.0    | 39.6     | 11.7 | 62.0 |
|           | Emb.   | CFA <a href="#">Lee et al. (2022)</a>            | 78.3 | 94.4                 | 89.9        | 71.4 | 37.4                 | 36.5    | 30.1     | 22.4 | 65.7 |
|           |        | PatchCore <a href="#">Roth et al. (2022)</a>     | 100. | 100.                 | 100.        | 98.8 | 88.9                 | 85.8    | 95.6     | 75.1 | 96.1 |
|           |        | CFLOW-AD <a href="#">Gudovskiy et al. (2022)</a> | 96.9 | 99.3                 | 96.2        | 96.0 | 71.2                 | 71.7    | 88.5     | 55.8 | 89.7 |
|           |        | PyramidalFlow <a href="#">Lei et al. (2023)</a>  | 63.0 | 89.9                 | 90.2        | 81.6 | 41.9                 | 45.8    | 37.3     | 29.7 | 66.3 |
|           |        | RD <a href="#">Deng &amp; Li (2022)</a>          | 99.9 | 100.                 | 99.5        | 93.9 | 62.8                 | 64.7    | 92.0     | 47.9 | 89.1 |
|           | Rec.   | DiAD <a href="#">He et al. (2024b)</a>           | 88.1 | 97.4                 | 89.9        | 94.5 | 74.0                 | 72.7    | 53.5     | 57.2 | 81.4 |
|           |        | ViTAD <a href="#">Zhang et al. (2023a)</a>       | 99.7 | 99.9                 | 98.9        | 96.1 | 74.0                 | 75.7    | 93.0     | 60.9 | 92.1 |
|           |        | InvAD <a href="#">Zhang et al. (2024a)</a>       | 100. | 100.                 | 100.        | 97.4 | 79.0                 | 81.2    | 93.1     | 68.4 | 93.8 |
|           |        | InvAD-lite <a href="#">Zhang et al. (2024a)</a>  | 99.8 | 100.                 | 98.9        | 97.2 | 78.3                 | 79.5    | 93.8     | 66.0 | 93.4 |
|           |        | MambaAD <a href="#">He et al. (2024a)</a>        | 99.7 | 99.9                 | 98.4        | 96.7 | 74.2                 | 78.3    | 92.9     | 64.4 | 92.4 |
|           | Hybrid | UniAD <a href="#">You et al. (2022)</a>          | 98.0 | 99.5                 | 98.4        | 93.4 | 55.0                 | 67.2    | 80.8     | 50.6 | 86.4 |
|           |        | RD++ <a href="#">Tien et al. (2023)</a>          | 100. | 100.                 | 100.        | 96.7 | 74.7                 | 78.4    | 94.1     | 64.5 | 93.0 |
|           |        | DesTSeg <a href="#">Zhang et al. (2023c)</a>     | 99.8 | 100.                 | 98.9        | 95.8 | 88.2                 | 82.5    | 94.8     | 70.2 | 94.9 |

Table A23: Benchmarked results on MVTec AD dataset [Bergmann et al. \(2019\)](#) by the suggested metrics in Sec. 3.3.

|            | Method | Image-level                                      |             |                      | Pixel-level |             |                      | mAU-PRO     | mIoU-max    | mAD         |
|------------|--------|--------------------------------------------------|-------------|----------------------|-------------|-------------|----------------------|-------------|-------------|-------------|
|            |        | mAU-ROC                                          | mAP         | mF <sub>1</sub> -max | mAU-ROC     | mAP         | mF <sub>1</sub> -max |             |             |             |
| pill       | Aug.   | DRAEM <a href="#">Zavrtanik et al. (2021)</a>    | 57.1        | 87.5                 | 92.1        | 34.8        | 2.0                  | 6.6         | 4.4         | 45.4        |
|            |        | SimpleNet <a href="#">Liu et al. (2023)</a>      | 90.6        | 98.1                 | 94.2        | 96.7        | 74.7                 | 70.6        | 85.3        | 88.1        |
|            |        | RealNet <a href="#">Zhang et al. (2024c)</a>     | 68.5        | 92.8                 | 91.6        | 54.4        | 47.8                 | 8.9         | 35.1        | 60.4        |
|            | Emb.   | CFA <a href="#">Lee et al. (2022)</a>            | 71.3        | 93.4                 | 92.2        | 88.7        | 66.4                 | 63.7        | 42.1        | 46.8        |
|            |        | PatchCore <a href="#">Roth et al. (2022)</a>     | 97.0        | 99.4                 | 96.5        | 98.1        | 76.8                 | 74.0        | 96.1        | 91.9        |
|            |        | CFLOW-AD <a href="#">Gudovskiy et al. (2022)</a> | 84.3        | 96.5                 | 93.2        | 96.7        | 59.5                 | 56.3        | 90.5        | 39.2        |
|            |        | PyramidalFlow <a href="#">Lei et al. (2023)</a>  | 67.0        | 92.8                 | 91.6        | 83.3        | 18.3                 | 26.0        | 65.2        | 14.9        |
|            |        | RD <a href="#">Deng &amp; Li (2022)</a>          | 97.2        | 99.5                 | 96.8        | 97.4        | 63.0                 | 64.8        | 96.1        | 47.9        |
|            | Rec.   | DiAD <a href="#">He et al. (2024b)</a>           | 94.7        | 98.9                 | 97.2        | 92.8        | 49.1                 | 49.7        | 65.2        | 33.1        |
|            |        | ViTAD <a href="#">Zhang et al. (2023a)</a>       | 96.9        | 99.5                 | 96.1        | <b>98.7</b> | 77.7                 | <b>75.0</b> | 95.5        | <b>59.9</b> |
|            |        | InvAD <a href="#">Zhang et al. (2024a)</a>       | <b>98.6</b> | <b>99.8</b>          | <b>97.5</b> | 97.9        | 67.7                 | 68.7        | <b>96.6</b> | 52.3        |
|            |        | InvAD-lite <a href="#">Zhang et al. (2024a)</a>  | 96.3        | 99.4                 | 95.4        | 97.6        | 65.4                 | 67.9        | <u>96.4</u> | 51.4        |
|            |        | MambaAD <a href="#">He et al. (2024a)</a>        | 94.7        | 99.0                 | 96.5        | 96.2        | 55.0                 | 58.9        | 95.2        | 41.7        |
|            | Hybrid | UniAD <a href="#">You et al. (2022)</a>          | 75.1        | 94.3                 | 91.6        | 90.0        | 21.4                 | 28.6        | 89.2        | 16.7        |
|            |        | RD++ <a href="#">Tien et al. (2023)</a>          | 98.0        | 99.6                 | <b>97.5</b> | 98.2        | 72.7                 | 70.3        | 96.4        | 54.2        |
|            |        | DesTSeg <a href="#">Zhang et al. (2023c)</a>     | 92.7        | 98.6                 | 94.8        | 90.1        | <b>78.7</b>          | 73.9        | 70.2        | 58.6        |
| screw      | Aug.   | DRAEM <a href="#">Zavrtanik et al. (2021)</a>    | 48.4        | 71.5                 | 85.3        | 41.4        | 0.2                  | 0.5         | 9.3         | 0.3         |
|            |        | SimpleNet <a href="#">Liu et al. (2023)</a>      | 77.5        | 90.6                 | 86.7        | 95.8        | 15.8                 | 23.8        | 83.1        | 13.5        |
|            |        | RealNet <a href="#">Zhang et al. (2024c)</a>     | 71.3        | 86.6                 | 87.0        | 51.8        | 15.4                 | 4.5         | 18.5        | 2.3         |
|            | Emb.   | CFA <a href="#">Lee et al. (2022)</a>            | 62.4        | 78.6                 | 88.5        | 26.5        | 0.2                  | 0.7         | 9.9         | 0.3         |
|            |        | PatchCore <a href="#">Roth et al. (2022)</a>     | <b>98.3</b> | <b>99.4</b>          | <b>97.1</b> | <b>99.5</b> | 41.5                 | 44.6        | 97.2        | 28.7        |
|            |        | CFLOW-AD <a href="#">Gudovskiy et al. (2022)</a> | 63.4        | 85.1                 | 85.3        | 96.5        | 13.6                 | 18.5        | 87.7        | 10.2        |
|            |        | PyramidalFlow <a href="#">Lei et al. (2023)</a>  | 63.7        | 78.7                 | 87.0        | 71.4        | 0.9                  | 2.1         | 21.5        | 1.0         |
|            |        | RD <a href="#">Deng &amp; Li (2022)</a>          | 97.8        | <u>99.3</u>          | <u>96.3</u> | <u>99.4</u> | 42.3                 | <u>47.3</u> | 97.1        | 31.0        |
|            | Rec.   | DiAD <a href="#">He et al. (2024b)</a>           | 63.2        | 82.8                 | 86.9        | 86.3        | 3.3                  | 9.2         | 57.4        | 4.8         |
|            |        | ViTAD <a href="#">Zhang et al. (2023a)</a>       | 91.6        | 97.2                 | 91.4        | 98.9        | 32.3                 | 39.9        | 93.6        | 24.9        |
|            |        | InvAD <a href="#">Zhang et al. (2024a)</a>       | 91.7        | 95.1                 | <u>96.0</u> | <b>99.5</b> | 44.0                 | 46.4        | <u>97.6</u> | 30.2        |
|            |        | InvAD-lite <a href="#">Zhang et al. (2024a)</a>  | 93.0        | 97.4                 | 93.6        | 99.4        | 47.2                 | 48.9        | <u>97.5</u> | 32.4        |
|            |        | MambaAD <a href="#">He et al. (2024a)</a>        | 92.7        | 96.8                 | 94.0        | <u>99.3</u> | 45.3                 | 45.1        | <u>97.0</u> | 29.1        |
|            | Hybrid | UniAD <a href="#">You et al. (2022)</a>          | 88.4        | 94.4                 | 92.3        | 98.2        | 19.2                 | 28.4        | 90.9        | 16.5        |
|            |        | RD++ <a href="#">Tien et al. (2023)</a>          | 97.5        | 99.2                 | 95.8        | <b>99.5</b> | <u>45.5</u>          | <u>48.9</u> | <b>97.7</b> | 32.3        |
|            |        | DesTSeg <a href="#">Zhang et al. (2023c)</a>     | 86.1        | 95.2                 | 88.6        | 76.2        | <b>52.1</b>          | <b>50.0</b> | 53.3        | <b>33.3</b> |
| tile       | Aug.   | DRAEM <a href="#">Zavrtanik et al. (2021)</a>    | 68.0        | 84.7                 | 84.0        | 48.2        | 6.3                  | 13.3        | 14.0        | 7.1         |
|            |        | SimpleNet <a href="#">Liu et al. (2023)</a>      | <b>100.</b> | <b>100.</b>          | 99.4        | 95.4        | <u>59.1</u>          | 60.4        | 82.5        | 43.3        |
|            |        | RealNet <a href="#">Zhang et al. (2024c)</a>     | 97.5        | 99.3                 | 97.6        | 93.9        | <u>84.1</u>          | <u>76.8</u> | <u>90.5</u> | <u>62.3</u> |
|            | Emb.   | CFA <a href="#">Lee et al. (2022)</a>            | 46.0        | 74.5                 | 83.6        | 40.3        | 8.5                  | 13.2        | 16.6        | 7.0         |
|            |        | PatchCore <a href="#">Roth et al. (2022)</a>     | <b>100.</b> | <b>100.</b>          | 99.4        | 96.4        | 58.7                 | 67.1        | 86.6        | 50.5        |
|            |        | CFLOW-AD <a href="#">Gudovskiy et al. (2022)</a> | 99.8        | 99.9                 | 99.4        | 96.0        | 56.0                 | 62.1        | 86.5        | 45.0        |
|            |        | PyramidalFlow <a href="#">Lei et al. (2023)</a>  | 78.6        | 92.2                 | 83.6        | 75.7        | 55.1                 | 28.1        | 34.4        | 16.3        |
|            |        | RD <a href="#">Deng &amp; Li (2022)</a>          | 99.0        | <u>99.6</u>          | 97.0        | 95.3        | 48.7                 | 61.0        | 86.3        | 43.9        |
|            | Rec.   | DiAD <a href="#">He et al. (2024b)</a>           | 93.4        | 96.6                 | 95.1        | 76.1        | 24.1                 | 32.9        | 49.7        | 19.7        |
|            |        | ViTAD <a href="#">Zhang et al. (2023a)</a>       | <b>100.</b> | <b>100.</b>          | <b>100.</b> | <u>96.7</u> | 56.6                 | <u>69.0</u> | 88.7        | 52.7        |
|            |        | InvAD <a href="#">Zhang et al. (2024a)</a>       | <b>100.</b> | <b>100.</b>          | <b>100.</b> | 95.8        | 49.8                 | 62.4        | 88.3        | 45.4        |
|            |        | InvAD-lite <a href="#">Zhang et al. (2024a)</a>  | 98.0        | 99.2                 | 96.5        | 93.9        | 44.9                 | 54.5        | 80.1        | 37.4        |
|            |        | MambaAD <a href="#">He et al. (2024a)</a>        | 96.8        | 98.8                 | 93.8        | 93.0        | 43.9                 | 52.6        | 79.5        | 35.7        |
|            | Hybrid | UniAD <a href="#">You et al. (2022)</a>          | 96.7        | 98.8                 | 95.8        | 89.2        | 38.9                 | 47.5        | 77.6        | 31.1        |
|            |        | RD++ <a href="#">Tien et al. (2023)</a>          | <b>100.</b> | <b>100.</b>          | 99.4        | 96.7        | 56.8                 | 66.4        | 89.8        | 49.7        |
|            |        | DesTSeg <a href="#">Zhang et al. (2023c)</a>     | 99.7        | 99.9                 | <u>98.2</u> | <b>97.5</b> | <b>89.4</b>          | <b>81.9</b> | <b>95.7</b> | <b>69.4</b> |
| toothbrush | Aug.   | DRAEM <a href="#">Zavrtanik et al. (2021)</a>    | 44.2        | 72.8                 | 83.3        | 46.8        | 1.4                  | 3.1         | 14.5        | 1.6         |
|            |        | SimpleNet <a href="#">Liu et al. (2023)</a>      | 89.4        | 95.8                 | 90.9        | 98.0        | 53.6                 | 55.9        | 80.6        | 38.8        |
|            |        | RealNet <a href="#">Zhang et al. (2024c)</a>     | 76.4        | 91.5                 | 83.3        | 84.8        | 50.1                 | 56.1        | 34.1        | 39.0        |
|            | Emb.   | CFA <a href="#">Lee et al. (2022)</a>            | 61.4        | 72.0                 | 87.9        | 69.6        | 3.3                  | 8.5         | 43.8        | 4.4         |
|            |        | PatchCore <a href="#">Roth et al. (2022)</a>     | 91.9        | 96.2                 | <u>95.2</u> | 99.0        | <u>54.8</u>          | 58.5        | 91.0        | 41.3        |
|            |        | CFLOW-AD <a href="#">Gudovskiy et al. (2022)</a> | 84.4        | 94.5                 | 86.2        | 98.2        | 45.7                 | 47.1        | 84.5        | 30.8        |
|            |        | PyramidalFlow <a href="#">Lei et al. (2023)</a>  | 89.4        | 95.7                 | 90.6        | 73.0        | 42.3                 | 31.3        | 23.2        | 18.6        |
|            |        | RD <a href="#">Deng &amp; Li (2022)</a>          | 98.3        | 99.4                 | 96.6        | 98.9        | 51.8                 | 57.7        | <b>92.6</b> | 40.5        |
|            | Rec.   | DiAD <a href="#">He et al. (2024b)</a>           | 95.3        | 98.1                 | <u>95.2</u> | 89.6        | 11.0                 | 17.5        | 65.3        | 9.6         |
|            |        | ViTAD <a href="#">Zhang et al. (2023a)</a>       | <b>98.6</b> | <b>99.5</b>          | <b>96.8</b> | <b>99.1</b> | 51.8                 | <u>62.2</u> | 91.3        | <u>45.1</u> |
|            |        | InvAD <a href="#">Zhang et al. (2024a)</a>       | 93.9        | 97.4                 | <u>95.2</u> | 99.0        | 50.6                 | 59.7        | 91.6        | 42.6        |
|            |        | InvAD-lite <a href="#">Zhang et al. (2024a)</a>  | 97.8        | 99.1                 | <u>95.2</u> | 98.9        | 48.1                 | 59.1        | 91.9        | 41.9        |
|            |        | MambaAD <a href="#">He et al. (2024a)</a>        | 96.4        | 98.5                 | <b>96.8</b> | 98.9        | 47.5                 | 59.7        | 92.0        | 42.5        |
|            | Hybrid | UniAD <a href="#">You et al. (2022)</a>          | 83.9        | 93.1                 | 90.9        | 98.4        | 39.7                 | 49.9        | 85.8        | 33.3        |
|            |        | RD++ <a href="#">Tien et al. (2023)</a>          | 95.8        | 98.3                 | 95.1        | <b>99.1</b> | <u>57.3</u>          | <u>61.8</u> | <u>92.2</u> | 44.8        |
|            |        | DesTSeg <a href="#">Zhang et al. (2023c)</a>     | 91.7        | 96.5                 | <u>95.2</u> | 95.6        | <b>60.6</b>          | <b>72.1</b> | 65.5        | <b>56.4</b> |

Table A24: Benchmarked results on MVTec AD dataset [Bergmann et al. \(2019\)](#) by the suggested metrics in Sec. 3.3.

|            | Method | Image-level                                      |      |                      | Pixel-level |      |                      | mAU-PRO | mIoU-max | mAD  |      |
|------------|--------|--------------------------------------------------|------|----------------------|-------------|------|----------------------|---------|----------|------|------|
|            |        | mAU-ROC                                          | mAP  | mF <sub>1</sub> -max | mAU-ROC     | mAP  | mF <sub>1</sub> -max |         |          |      |      |
| transistor | Aug.   | DRAEM <a href="#">Zavrtanik et al. (2021)</a>    | 52.8 | 44.1                 | 57.1        | 51.7 | 4.6                  | 9.3     | 17.8     | 4.9  | 36.1 |
|            |        | SimpleNet <a href="#">Liu et al. (2023)</a>      | 97.8 | 96.6                 | 91.6        | 95.4 | 60.4                 | 57.6    | 82.5     | 40.4 | 84.7 |
|            |        | RealNet <a href="#">Zhang et al. (2024c)</a>     | 79.7 | 83.0                 | 73.3        | 60.9 | 40.2                 | 28.3    | 44.6     | 16.5 | 61.1 |
|            | Emb.   | CFA <a href="#">Lee et al. (2022)</a>            | 68.9 | 64.8                 | 63.4        | 60.5 | 17.6                 | 20.4    | 22.0     | 11.3 | 47.9 |
|            |        | PatchCore <a href="#">Roth et al. (2022)</a>     | 99.8 | 99.7                 | 97.5        | 96.0 | 62.3                 | 59.2    | 90.8     | 42.0 | 88.0 |
|            |        | CFLOW-AD <a href="#">Gudovskiy et al. (2022)</a> | 90.5 | 91.4                 | 84.2        | 84.8 | 38.3                 | 39.0    | 73.0     | 24.2 | 73.7 |
|            |        | PyramidalFlow <a href="#">Lei et al. (2023)</a>  | 50.8 | 53.8                 | 57.1        | 75.9 | 13.2                 | 19.5    | 26.1     | 10.8 | 43.8 |
|            | Rec.   | RD <a href="#">Deng &amp; Li (2022)</a>          | 94.2 | 94.8                 | 89.5        | 85.1 | 41.8                 | 44.7    | 74.5     | 28.8 | 77.2 |
|            |        | DiAD <a href="#">He et al. (2024b)</a>           | 99.0 | 98.1                 | 97.5        | 97.8 | 71.8                 | 67.6    | 85.7     | 51.1 | 88.2 |
|            |        | ViTAD <a href="#">Zhang et al. (2023a)</a>       | 97.7 | 96.7                 | 91.6        | 93.6 | 57.5                 | 54.3    | 76.6     | 37.3 | 82.9 |
|            |        | InvAD <a href="#">Zhang et al. (2024a)</a>       | 97.8 | 96.8                 | 92.7        | 95.7 | 62.0                 | 59.7    | 91.9     | 42.6 | 86.5 |
|            |        | InvAD-lite <a href="#">Zhang et al. (2024a)</a>  | 98.2 | 97.4                 | 92.3        | 95.0 | 61.0                 | 58.9    | 88.3     | 41.8 | 85.9 |
|            |        | MambaAD <a href="#">He et al. (2024a)</a>        | 99.9 | 99.8                 | 98.7        | 96.0 | 63.8                 | 61.6    | 90.4     | 44.5 | 88.7 |
|            | Hybrid | UniAD <a href="#">You et al. (2022)</a>          | 99.3 | 98.9                 | 97.6        | 97.3 | 66.8                 | 66.4    | 92.2     | 49.7 | 89.6 |
|            |        | RD++ <a href="#">Tien et al. (2023)</a>          | 95.2 | 95.0                 | 89.5        | 89.3 | 47.7                 | 49.0    | 77.9     | 32.4 | 79.6 |
|            |        | DesTSeg <a href="#">Zhang et al. (2023c)</a>     | 96.9 | 96.2                 | 89.5        | 73.9 | 54.1                 | 50.5    | 76.6     | 33.8 | 79.0 |
| wood       | Aug.   | DRAEM <a href="#">Zavrtanik et al. (2021)</a>    | 74.3 | 90.2                 | 87.2        | 49.7 | 4.4                  | 7.5     | 14.6     | 3.9  | 51.5 |
|            |        | SimpleNet <a href="#">Liu et al. (2023)</a>      | 99.5 | 99.8                 | 98.3        | 92.5 | 40.3                 | 42.4    | 80.0     | 26.9 | 81.5 |
|            |        | RealNet <a href="#">Zhang et al. (2024c)</a>     | 99.6 | 99.9                 | 99.2        | 90.4 | 76.1                 | 71.9    | 88.8     | 56.1 | 90.7 |
|            | Emb.   | CFA <a href="#">Lee et al. (2022)</a>            | 72.5 | 90.1                 | 87.0        | 54.4 | 6.8                  | 9.3     | 31.6     | 4.9  | 54.4 |
|            |        | PatchCore <a href="#">Roth et al. (2022)</a>     | 98.7 | 99.6                 | 96.7        | 95.2 | 52.1                 | 52.3    | 91.3     | 35.4 | 85.5 |
|            |        | CFLOW-AD <a href="#">Gudovskiy et al. (2022)</a> | 98.4 | 99.5                 | 96.6        | 94.2 | 45.7                 | 49.8    | 90.2     | 33.1 | 84.1 |
|            |        | PyramidalFlow <a href="#">Lei et al. (2023)</a>  | 86.7 | 95.5                 | 88.5        | 62.6 | 39.5                 | 17.9    | 32.3     | 9.8  | 64.2 |
|            | Rec.   | RD <a href="#">Deng &amp; Li (2022)</a>          | 99.6 | 99.9                 | 98.3        | 95.5 | 49.7                 | 51.6    | 91.7     | 34.8 | 85.7 |
|            |        | DiAD <a href="#">He et al. (2024b)</a>           | 94.3 | 97.8                 | 94.3        | 82.8 | 15.1                 | 22.2    | 57.5     | 12.5 | 66.3 |
|            |        | ViTAD <a href="#">Zhang et al. (2023a)</a>       | 98.8 | 99.6                 | 96.7        | 96.3 | 61.3                 | 59.2    | 89.3     | 42.0 | 87.4 |
|            |        | InvAD <a href="#">Zhang et al. (2024a)</a>       | 99.2 | 99.8                 | 98.3        | 95.3 | 51.3                 | 52.1    | 91.7     | 35.2 | 85.8 |
|            |        | InvAD-lite <a href="#">Zhang et al. (2024a)</a>  | 96.9 | 99.0                 | 95.9        | 94.4 | 44.8                 | 47.6    | 89.1     | 31.2 | 83.1 |
|            |        | MambaAD <a href="#">He et al. (2024a)</a>        | 98.5 | 99.5                 | 96.0        | 94.0 | 46.9                 | 48.4    | 92.0     | 32.0 | 84.2 |
|            | Hybrid | UniAD <a href="#">You et al. (2022)</a>          | 98.2 | 99.5                 | 96.6        | 93.1 | 40.6                 | 45.1    | 89.5     | 29.1 | 82.6 |
|            |        | RD++ <a href="#">Tien et al. (2023)</a>          | 98.9 | 99.7                 | 97.5        | 95.6 | 52.2                 | 52.4    | 91.0     | 35.5 | 85.8 |
|            |        | DesTSeg <a href="#">Zhang et al. (2023c)</a>     | 98.6 | 99.5                 | 97.6        | 93.2 | 79.5                 | 72.5    | 95.0     | 56.8 | 91.8 |
| zipper     | Aug.   | DRAEM <a href="#">Zavrtanik et al. (2021)</a>    | 44.4 | 79.9                 | 88.1        | 55.4 | 2.7                  | 6.1     | 20.7     | 3.2  | 46.0 |
|            |        | SimpleNet <a href="#">Liu et al. (2023)</a>      | 99.1 | 99.8                 | 97.5        | 97.9 | 57.8                 | 55.4    | 91.9     | 38.3 | 87.3 |
|            |        | RealNet <a href="#">Zhang et al. (2024c)</a>     | 77.3 | 94.1                 | 88.1        | 67.6 | 51.9                 | 42.6    | 47.7     | 27.1 | 69.5 |
|            | Emb.   | CFA <a href="#">Lee et al. (2022)</a>            | 34.8 | 72.3                 | 88.1        | 64.4 | 3.2                  | 7.5     | 23.4     | 3.9  | 44.8 |
|            |        | PatchCore <a href="#">Roth et al. (2022)</a>     | 99.6 | 99.9                 | 98.7        | 98.9 | 63.4                 | 64.6    | 96.4     | 47.8 | 90.1 |
|            |        | CFLOW-AD <a href="#">Gudovskiy et al. (2022)</a> | 95.6 | 98.5                 | 96.7        | 97.9 | 50.2                 | 54.8    | 92.4     | 37.7 | 85.4 |
|            |        | PyramidalFlow <a href="#">Lei et al. (2023)</a>  | 83.3 | 95.1                 | 89.1        | 81.0 | 15.4                 | 16.3    | 55.7     | 8.9  | 65.6 |
|            | Rec.   | RD <a href="#">Deng &amp; Li (2022)</a>          | 99.5 | 99.9                 | 99.2        | 98.5 | 56.0                 | 61.0    | 95.5     | 43.8 | 88.6 |
|            |        | DiAD <a href="#">He et al. (2024b)</a>           | 73.5 | 90.3                 | 90.0        | 84.4 | 14.3                 | 24.0    | 56.7     | 13.7 | 61.9 |
|            |        | ViTAD <a href="#">Zhang et al. (2023a)</a>       | 97.5 | 99.2                 | 97.0        | 95.9 | 44.1                 | 50.1    | 89.5     | 33.4 | 83.9 |
|            |        | InvAD <a href="#">Zhang et al. (2024a)</a>       | 99.4 | 99.8                 | 98.3        | 98.2 | 50.2                 | 57.7    | 94.5     | 40.5 | 87.2 |
|            |        | InvAD-lite <a href="#">Zhang et al. (2024a)</a>  | 97.5 | 99.3                 | 96.7        | 98.6 | 58.4                 | 61.4    | 95.8     | 44.3 | 88.2 |
|            |        | MambaAD <a href="#">He et al. (2024a)</a>        | 98.2 | 99.5                 | 96.7        | 98.1 | 55.0                 | 58.9    | 94.5     | 41.7 | 87.4 |
|            | Hybrid | UniAD <a href="#">You et al. (2022)</a>          | 86.9 | 95.5                 | 92.8        | 95.8 | 33.5                 | 41.0    | 88.7     | 25.8 | 78.2 |
|            |        | RD++ <a href="#">Tien et al. (2023)</a>          | 99.3 | 99.8                 | 98.7        | 98.4 | 53.5                 | 59.2    | 94.8     | 42.1 | 87.9 |
|            |        | DesTSeg <a href="#">Zhang et al. (2023c)</a>     | 97.6 | 99.0                 | 98.3        | 90.6 | 71.9                 | 66.9    | 86.2     | 50.3 | 88.6 |
| Avg        | Aug.   | DRAEM <a href="#">Zavrtanik et al. (2021)</a>    | 54.5 | 76.3                 | 83.6        | 47.6 | 3.2                  | 6.7     | 14.3     | 3.5  | 44.7 |
|            |        | SimpleNet <a href="#">Liu et al. (2023)</a>      | 95.4 | 98.3                 | 95.7        | 96.8 | 48.8                 | 51.9    | 86.9     | 36.4 | 83.8 |
|            |        | RealNet <a href="#">Zhang et al. (2024c)</a>     | 84.8 | 94.1                 | 90.9        | 72.6 | 48.2                 | 41.4    | 56.8     | 28.8 | 72.3 |
|            | Emb.   | CFA <a href="#">Lee et al. (2022)</a>            | 57.6 | 78.3                 | 84.7        | 54.8 | 11.9                 | 14.7    | 25.3     | 8.9  | 50.1 |
|            |        | PatchCore <a href="#">Roth et al. (2022)</a>     | 98.8 | 99.5                 | 98.4        | 98.3 | 59.9                 | 61.0    | 94.2     | 44.9 | 88.6 |
|            |        | CFLOW-AD <a href="#">Gudovskiy et al. (2022)</a> | 91.6 | 96.7                 | 93.4        | 95.7 | 45.9                 | 48.6    | 88.3     | 33.2 | 81.8 |
|            |        | PyramidalFlow <a href="#">Lei et al. (2023)</a>  | 70.2 | 85.5                 | 85.5        | 80.0 | 22.3                 | 22.0    | 47.5     | 12.8 | 61.7 |
|            | Rec.   | RD <a href="#">Deng &amp; Li (2022)</a>          | 93.6 | 97.2                 | 95.6        | 95.8 | 48.2                 | 53.6    | 91.2     | 37.0 | 83.8 |
|            |        | DiAD <a href="#">He et al. (2024b)</a>           | 88.9 | 95.8                 | 93.5        | 89.3 | 27.0                 | 32.5    | 63.9     | 21.1 | 70.1 |
|            |        | ViTAD <a href="#">Zhang et al. (2023a)</a>       | 98.3 | 99.3                 | 97.3        | 97.6 | 55.2                 | 58.4    | 92.0     | 42.3 | 87.1 |
|            |        | InvAD <a href="#">Zhang et al. (2024a)</a>       | 98.1 | 99.0                 | 97.6        | 98.0 | 56.3                 | 59.2    | 94.4     | 42.8 | 87.6 |
|            |        | InvAD-lite <a href="#">Zhang et al. (2024a)</a>  | 97.9 | 99.2                 | 96.8        | 97.3 | 54.4                 | 57.8    | 93.3     | 41.4 | 86.8 |
|            |        | MambaAD <a href="#">He et al. (2024a)</a>        | 97.8 | 99.3                 | 97.3        | 97.4 | 55.1                 | 57.6    | 93.4     | 41.2 | 87.0 |
|            | Hybrid | UniAD <a href="#">You et al. (2022)</a>          | 92.5 | 97.3                 | 95.4        | 95.8 | 42.7                 | 48.0    | 89.3     | 32.5 | 82.0 |
|            |        | RD++ <a href="#">Tien et al. (2023)</a>          | 97.9 | 98.8                 | 96.4        | 97.3 | 54.7                 | 58.0    | 93.2     | 41.5 | 86.8 |
|            |        | DesTSeg <a href="#">Zhang et al. (2023c)</a>     | 96.4 | 98.6                 | 96.2        | 92.0 | 71.1                 | 68.2    | 83.4     | 52.8 | 87.9 |

## D DETAILED QUANTITATIVE RESULTS ON MVTEC 3D DATASET UNDER 100 EPOCHS

Table A25: Benchmarked results on MVTEC 3D dataset [Bergmann et al. \(2022b\)](#) by the suggested metrics in Sec. 3.3.

|             | Method                                             | Image-level |             |                      | Pixel-level |             |                      | mAU-PRO     | mIoU-max    | mAD         |
|-------------|----------------------------------------------------|-------------|-------------|----------------------|-------------|-------------|----------------------|-------------|-------------|-------------|
|             |                                                    | mAU-ROC     | mAP         | mF <sub>1</sub> -max | mAU-ROC     | mAP         | mF <sub>1</sub> -max |             |             |             |
| bagel       | Aug. DRAEM <a href="#">Zavrtanik et al. (2021)</a> | 54.3        | 84.7        | 88.9                 | 53.5        | 2.5         | 6.3                  | 32.2        | 3.3         | 49.8        |
|             | SimpleNet <a href="#">Liu et al. (2023)</a>        | 79.5        | 94.8        | 88.9                 | 95.2        | 20.0        | 29.3                 | 71.1        | 17.1        | 70.8        |
|             | Emb. CFA <a href="#">Lee et al. (2022)</a>         | 82.6        | 95.6        | 89.3                 | 84.3        | 19.1        | 30.6                 | 48.8        | 18.1        | 67.4        |
|             | PatchCore <a href="#">Roth et al. (2022)</a>       | 91.8        | 98.0        | 92.9                 | 98.8        | 43.7        | 46.8                 | 93.3        | 30.5        | 82.4        |
|             | CFLOW-AD <a href="#">Gudovskiy et al. (2022)</a>   | 78.8        | 94.2        | 89.3                 | 98.3        | 31.3        | 38.9                 | 89.7        | 24.2        | 76.0        |
|             | PyramidalFlow <a href="#">Lei et al. (2023)</a>    | 50.5        | 84.4        | 88.9                 | 94.3        | 5.3         | 11.5                 | 79.3        | 6.1         | 61.1        |
|             | Rec. RD Deng & Li (2022)                           | 86.2        | 96.5        | 90.5                 | 98.7        | 40.2        | 44.5                 | 92.2        | 28.6        | 80.0        |
|             | DiAD He et al. (2024b)                             | 75.8        | 93.5        | 90.5                 | 89.7        | 4.3         | 10.1                 | 66.4        | 5.3         | 61.5        |
|             | ViTAD Zhang et al. (2023a)                         | 92.1        | 98.0        | 93.4                 | 98.7        | 40.3        | 44.2                 | 92.4        | 28.4        | 81.7        |
|             | InvAD Zhang et al. (2024a)                         | 95.3        | <b>98.8</b> | <b>94.6</b>          | <b>99.1</b> | 45.4        | 49.6                 | <b>95.0</b> | <b>33.0</b> | <b>84.3</b> |
|             | InvAD-lite Zhang et al. (2024a)                    | 87.8        | 97.0        | 90.9                 | 98.6        | 41.9        | 45.6                 | 92.1        | 29.5        | 80.7        |
|             | MambaAD He et al. (2024a)                          | 93.4        | 98.3        | 93.3                 | 98.7        | 41.0        | 45.3                 | 94.6        | 29.3        | 82.5        |
|             | Hybrid UniAD You et al. (2022)                     | 88.3        | 97.2        | 90.3                 | 98.1        | 35.5        | 40.3                 | 91.3        | 25.2        | 79.1        |
|             | RD++ Tien et al. (2023)                            | 87.2        | 96.6        | 91.5                 | 98.7        | 39.5        | 46.9                 | 92.5        | 30.7        | 80.6        |
|             | DesTSeg Zhang et al. (2023c)                       | <b>95.4</b> | <b>98.8</b> | 94.5                 | 94.6        | <b>63.2</b> | <b>60.2</b>          | 86.3        | <b>43.1</b> | <b>86.2</b> |
|             | Aug. DRAEM <a href="#">Zavrtanik et al. (2021)</a> | 61.1        | 85.0        | 89.7                 | 40.1        | 0.3         | 0.5                  | 15.7        | 0.3         | 46.4        |
|             | SimpleNet <a href="#">Liu et al. (2023)</a>        | 75.8        | 92.5        | 91.1                 | 96.3        | 15.6        | 23.9                 | 87.9        | 13.6        | 71.2        |
| cable gland | Emb. CFA <a href="#">Lee et al. (2022)</a>         | 61.2        | 87.5        | 89.2                 | 71.0        | 1.8         | 4.6                  | 38.7        | 2.4         | 54.2        |
|             | PatchCore <a href="#">Roth et al. (2022)</a>       | 96.4        | 99.0        | 96.1                 | 99.5        | 37.3        | 43.6                 | 98.3        | 27.9        | 83.4        |
|             | CFLOW-AD <a href="#">Gudovskiy et al. (2022)</a>   | 69.7        | 90.2        | 90.1                 | 96.7        | 9.4         | 16.2                 | 90.0        | 8.8         | 68.2        |
|             | PyramidalFlow <a href="#">Lei et al. (2023)</a>    | 64.4        | 88.9        | 89.7                 | 87.6        | 1.3         | 2.9                  | 62.9        | 1.5         | 59.8        |
|             | Rec. RD Deng & Li (2022)                           | 91.2        | 97.5        | 95.0                 | 99.5        | 39.7        | 44.8                 | 98.5        | 28.9        | 82.6        |
|             | DiAD He et al. (2024b)                             | 88.0        | 97.1        | 92.6                 | 95.0        | 4.6         | 10.1                 | 84.2        | 5.3         | 67.4        |
|             | ViTAD Zhang et al. (2023a)                         | 84.5        | 94.2        | 92.1                 | 98.7        | 22.6        | 31.4                 | 95.7        | 18.6        | 76.2        |
|             | InvAD Zhang et al. (2024a)                         | <b>96.6</b> | <b>99.1</b> | <b>96.6</b>          | <b>99.6</b> | 40.6        | 47.1                 | <b>98.8</b> | 30.8        | <b>84.5</b> |
|             | InvAD-lite Zhang et al. (2024a)                    | 93.7        | 98.5        | 96.0                 | 99.4        | 41.1        | 46.9                 | 98.5        | 30.6        | <b>83.8</b> |
|             | MambaAD He et al. (2024a)                          | 91.1        | 97.8        | 93.6                 | 99.3        | 38.8        | 44.6                 | 98.2        | 28.7        | 82.2        |
|             | Hybrid UniAD You et al. (2022)                     | 73.3        | 91.0        | 89.8                 | 97.1        | 14.2        | 22.0                 | 91.7        | 12.4        | 70.5        |
|             | RD++ Tien et al. (2023)                            | <b>96.6</b> | <b>99.1</b> | 96.0                 | <b>99.6</b> | 46.1        | 49.3                 | 98.7        | 32.7        | <b>85.3</b> |
|             | DesTSeg Zhang et al. (2023c)                       | 89.9        | 97.5        | 92.9                 | 89.9        | <b>47.8</b> | <b>52.3</b>          | 85.3        | <b>35.4</b> | 81.1        |
|             | Aug. DRAEM <a href="#">Zavrtanik et al. (2021)</a> | 50.8        | 83.6        | 90.7                 | 56.2        | 0.6         | 0.9                  | 35.4        | 0.5         | 49.2        |
|             | SimpleNet <a href="#">Liu et al. (2023)</a>        | 82.4        | 96.1        | 92.5                 | 98.1        | 13.3        | 20.6                 | 92.6        | 11.5        | 73.2        |
|             | Emb. CFA <a href="#">Lee et al. (2022)</a>         | 58.6        | 88.6        | 91.0                 | 83.1        | 3.0         | 9.4                  | 54.0        | 5.0         | 58.4        |
|             | PatchCore <a href="#">Roth et al. (2022)</a>       | <b>95.2</b> | <b>99.0</b> | 95.6                 | <b>99.4</b> | 25.9        | 30.8                 | 97.7        | 18.2        | <b>80.0</b> |
| carrot      | CFLOW-AD <a href="#">Gudovskiy et al. (2022)</a>   | 85.2        | 96.8        | 92.3                 | 98.9        | 20.0        | 27.2                 | 96.0        | 15.7        | 76.0        |
|             | PyramidalFlow <a href="#">Lei et al. (2023)</a>    | 59.9        | 87.4        | 90.7                 | 97.8        | 13.0        | 18.8                 | 92.5        | 10.4        | 67.4        |
|             | Rec. RD Deng & Li (2022)                           | 85.4        | 96.2        | 92.5                 | <b>99.4</b> | 27.9        | 33.8                 | 97.7        | 20.4        | 78.0        |
|             | DiAD He et al. (2024b)                             | 93.4        | 98.3        | <b>98.1</b>          | 97.6        | 6.2         | 11.2                 | 91.1        | 5.9         | 70.8        |
|             | ViTAD Zhang et al. (2023a)                         | 77.4        | 93.0        | 92.2                 | 98.8        | 19.3        | 25.9                 | 95.9        | 14.8        | 73.8        |
|             | InvAD Zhang et al. (2024a)                         | 90.5        | 97.6        | 94.5                 | 99.3        | 24.9        | 30.1                 | 97.6        | 17.7        | 78.6        |
|             | InvAD-lite Zhang et al. (2024a)                    | 87.7        | 96.9        | 94.6                 | <b>99.4</b> | 27.6        | 32.7                 | <b>98.0</b> | 19.5        | 78.7        |
|             | MambaAD He et al. (2024a)                          | 90.1        | 97.7        | 93.9                 | 99.3        | 29.0        | 32.7                 | 97.9        | 19.6        | 79.3        |
|             | Hybrid UniAD You et al. (2022)                     | 75.0        | 93.8        | 91.4                 | 98.2        | 15.6        | 22.8                 | 94.2        | 12.9        | 72.2        |
|             | RD++ Tien et al. (2023)                            | 89.3        | 97.2        | 93.9                 | <b>99.4</b> | 28.2        | <b>34.0</b>          | 97.7        | <b>20.5</b> | 79.1        |
|             | DesTSeg Zhang et al. (2023c)                       | 78.2        | 93.7        | 91.3                 | 67.6        | <b>30.4</b> | 33.4                 | 46.1        | 20.0        | 66.1        |
|             | Aug. DRAEM <a href="#">Zavrtanik et al. (2021)</a> | <b>80.6</b> | <b>93.4</b> | <b>91.1</b>          | 47.3        | 1.7         | 5.2                  | 20.5        | 2.7         | 53.5        |
|             | SimpleNet <a href="#">Liu et al. (2023)</a>        | 66.9        | 89.0        | 88.0                 | 92.5        | 27.2        | 34.6                 | 71.5        | 21.0        | 68.9        |
|             | Emb. CFA <a href="#">Lee et al. (2022)</a>         | 61.2        | 86.8        | 88.4                 | 72.4        | 19.4        | 27.6                 | 38.3        | 16.0        | 59.1        |
|             | PatchCore <a href="#">Roth et al. (2022)</a>       | 71.0        | 91.6        | 88.0                 | 98.0        | <b>52.4</b> | <b>50.2</b>          | <b>92.5</b> | <b>33.5</b> | <b>78.4</b> |
|             | CFLOW-AD <a href="#">Gudovskiy et al. (2022)</a>   | 46.3        | 78.0        | 88.4                 | 96.9        | 30.3        | 32.6                 | 89.2        | 19.5        | 66.6        |
|             | PyramidalFlow <a href="#">Lei et al. (2023)</a>    | 23.4        | 67.8        | 88.0                 | 88.8        | 7.1         | 11.9                 | 70.8        | 6.3         | 52.2        |
| cookie      | Rec. RD Deng & Li (2022)                           | 50.2        | 80.1        | 88.0                 | 96.7        | 28.1        | 33.2                 | 87.4        | 19.9        | 67.1        |
|             | DiAD He et al. (2024b)                             | 52.6        | 84.7        | 88.0                 | 87.2        | 5.6         | 10.5                 | 67.2        | 5.5         | 56.6        |
|             | ViTAD Zhang et al. (2023a)                         | 70.7        | 90.9        | 88.2                 | 97.7        | 47.6        | 48.8                 | 87.6        | 32.3        | 76.8        |
|             | InvAD Zhang et al. (2024a)                         | 63.5        | 88.5        | 88.0                 | <b>98.4</b> | 48.8        | 49.3                 | <b>92.5</b> | 32.7        | 76.1        |
|             | InvAD-lite Zhang et al. (2024a)                    | 62.0        | 88.4        | 88.0                 | 97.3        | 39.9        | 42.8                 | 87.0        | 27.2        | 73.1        |
|             | MambaAD He et al. (2024a)                          | 58.3        | 85.6        | 88.4                 | 96.8        | 38.8        | 42.0                 | 84.3        | 26.6        | 71.5        |
|             | Hybrid UniAD You et al. (2022)                     | 62.3        | 86.9        | 88.0                 | 96.0        | 24.2        | 29.6                 | 88.1        | 17.4        | 69.3        |
|             | RD++ Tien et al. (2023)                            | 56.7        | 82.8        | 88.4                 | 97.6        | 39.6        | 42.6                 | 89.2        | 27.1        | 71.6        |
|             | DesTSeg Zhang et al. (2023c)                       | 61.7        | 87.9        | 88.4                 | 83.7        | 43.9        | 45.2                 | 57.8        | 29.2        | 68.5        |

Table A26: Benchmarked results on MVTec 3D dataset [Bergmann et al. \(2022b\)](#) by the suggested metrics in Sec. 3.3.

|        | Method                                           | Image-level |             |                      | Pixel-level |             |                      | mAU-PRO     | mIoU-max    | mAD         |
|--------|--------------------------------------------------|-------------|-------------|----------------------|-------------|-------------|----------------------|-------------|-------------|-------------|
|        |                                                  | mAU-ROC     | mAP         | mF <sub>1</sub> -max | mAU-ROC     | mAP         | mF <sub>1</sub> -max |             |             |             |
| dowel  | Aug.                                             |             |             |                      |             |             |                      |             |             |             |
|        | DRAEM <a href="#">Zavrtanik et al. (2021)</a>    | 38.5        | 75.0        | 88.9                 | 42.1        | 0.7         | 2.2                  | 24.6        | 1.1         | 42.4        |
|        | SimpleNet <a href="#">Liu et al. (2023)</a>      | 90.3        | 97.5        | 92.5                 | 97.8        | 16.2        | 21.5                 | 90.2        | 12.0        | 74.9        |
|        | Emb.                                             |             |             |                      |             |             |                      |             |             |             |
|        | CFA <a href="#">Lee et al. (2022)</a>            | 88.8        | 96.8        | 92.9                 | 85.0        | 7.1         | 11.1                 | 56.9        | 5.9         | 66.4        |
|        | PatchCore <a href="#">Roth et al. (2022)</a>     | 98.2        | 99.6        | 97.5                 | 99.3        | 44.5        | 46.7                 | 96.3        | 30.5        | 85.1        |
|        | CFLOW-AD <a href="#">Gudovskiy et al. (2022)</a> | 92.1        | 98.1        | 92.9                 | 98.8        | 28.3        | 32.7                 | 94.4        | 19.5        | 79.0        |
|        | PyramidalFlow <a href="#">Lei et al. (2023)</a>  | 66.5        | 89.3        | 89.7                 | 93.9        | 6.3         | 10.5                 | 74.9        | 5.5         | 64.1        |
|        | Rec.                                             |             |             |                      |             |             |                      |             |             |             |
|        | RD <a href="#">Deng &amp; Li (2022)</a>          | 97.3        | 99.3        | 96.7                 | <b>99.7</b> | 51.1        | 50.6                 | <b>98.8</b> | 33.9        | 86.4        |
|        | DiAD <a href="#">He et al. (2024b)</a>           | 65.3        | 89.1        | 91.9                 | 79.7        | 4.6         | 9.2                  | 47.9        | 4.8         | 55.4        |
|        | ViTAD <a href="#">Zhang et al. (2023a)</a>       | 94.1        | 98.5        | 94.8                 | 99.2        | 37.8        | 41.7                 | 95.9        | 26.3        | 82.2        |
|        | InvAD <a href="#">Zhang et al. (2024a)</a>       | <u>99.3</u> | <u>99.8</u> | <b>98.6</b>          | <b>99.7</b> | 49.5        | 48.6                 | <u>98.6</u> | 32.1        | <u>86.7</u> |
|        | InvAD-lite <a href="#">Zhang et al. (2024a)</a>  | 96.8        | 99.3        | 96.0                 | <u>99.6</u> | <u>51.4</u> | <b>51.5</b>          | <u>97.7</u> | <b>34.7</b> | 86.2        |
|        | MambaAD <a href="#">He et al. (2024a)</a>        | 96.5        | 99.2        | 95.3                 | 99.5        | 50.1        | 48.9                 | 97.4        | 32.3        | 85.5        |
|        | Hybrid                                           |             |             |                      |             |             |                      |             |             |             |
|        | UniAD <a href="#">You et al. (2022)</a>          | 87.1        | 96.9        | 90.1                 | 98.9        | 34.0        | 39.0                 | 95.3        | 24.2        | 79.1        |
|        | RD++ <a href="#">Tien et al. (2023)</a>          | <b>99.6</b> | <b>99.9</b> | <b>98.6</b>          | <b>99.7</b> | <b>53.9</b> | 51.3                 | <b>98.8</b> | 34.5        | <b>87.6</b> |
|        | DesTSeg <a href="#">Zhang et al. (2023c)</a>     | 86.0        | 96.5        | 90.2                 | 82.8        | 49.4        | 50.1                 | 60.8        | 33.4        | 75.8        |
| foam   | Aug.                                             |             |             |                      |             |             |                      |             |             |             |
|        | DRAEM <a href="#">Zavrtanik et al. (2021)</a>    | 50.3        | 81.6        | 88.9                 | 46.7        | 0.2         | 0.4                  | 14.4        | 0.2         | 44.5        |
|        | SimpleNet <a href="#">Liu et al. (2023)</a>      | 78.7        | 94.5        | 89.4                 | 86.4        | 12.1        | 22.1                 | 67.9        | 12.4        | 67.3        |
|        | Emb.                                             |             |             |                      |             |             |                      |             |             |             |
|        | CFA <a href="#">Lee et al. (2022)</a>            | 66.1        | 90.6        | 89.4                 | 45.1        | 8.0         | 21.0                 | 32.6        | 11.8        | 54.4        |
|        | PatchCore <a href="#">Roth et al. (2022)</a>     | 78.9        | 94.4        | 89.9                 | <b>94.9</b> | 18.8        | 29.6                 | 83.4        | 17.4        | 72.2        |
|        | CFLOW-AD <a href="#">Gudovskiy et al. (2022)</a> | 75.0        | 93.5        | 89.3                 | 85.5        | 15.8        | 27.2                 | 57.5        | 15.7        | 66.2        |
|        | PyramidalFlow <a href="#">Lei et al. (2023)</a>  | 65.6        | 90.2        | 88.9                 | 71.4        | 11.0        | 18.2                 | 49.9        | 10.0        | 59.6        |
|        | Rec.                                             |             |             |                      |             |             |                      |             |             |             |
|        | RD <a href="#">Deng &amp; Li (2022)</a>          | 70.2        | 91.7        | 89.4                 | 93.9        | 14.4        | 27.1                 | 81.0        | 15.6        | 68.9        |
|        | DiAD <a href="#">He et al. (2024b)</a>           | 78.3        | 94.4        | 89.2                 | 87.5        | 1.4         | 3.9                  | 59.7        | 2.0         | 59.2        |
|        | ViTAD <a href="#">Zhang et al. (2023a)</a>       | 82.9        | 95.4        | 90.8                 | 94.0        | 14.3        | 26.0                 | 81.3        | 14.9        | 71.8        |
|        | InvAD <a href="#">Zhang et al. (2024a)</a>       | <b>83.5</b> | <b>95.8</b> | <u>91.2</u>          | 93.8        | 18.8        | 31.0                 | 81.1        | 18.3        | 73.2        |
|        | InvAD-lite <a href="#">Zhang et al. (2024a)</a>  | 82.6        | 95.4        | 90.1                 | <u>94.4</u> | <u>24.1</u> | <u>32.9</u>          | 82.8        | 19.7        | 74.0        |
|        | MambaAD <a href="#">He et al. (2024a)</a>        | 79.9        | 94.7        | 89.9                 | <b>94.9</b> | <u>23.8</u> | <u>33.4</u>          | <b>83.8</b> | <u>20.1</u> | <u>73.6</u> |
|        | Hybrid                                           |             |             |                      |             |             |                      |             |             |             |
|        | UniAD <a href="#">You et al. (2022)</a>          | 76.8        | 94.0        | 88.9                 | 85.0        | 10.3        | 23.0                 | 60.1        | 13.0        | 65.6        |
|        | RD++ <a href="#">Tien et al. (2023)</a>          | 72.9        | 92.4        | <b>91.9</b>          | 92.7        | 16.3        | 28.7                 | 77.3        | 16.7        | 69.7        |
|        | DesTSeg <a href="#">Zhang et al. (2023c)</a>     | 80.2        | 95.0        | 89.1                 | 84.5        | <b>44.3</b> | <b>49.5</b>          | 72.7        | <b>32.9</b> | <b>75.4</b> |
| peach  | Aug.                                             |             |             |                      |             |             |                      |             |             |             |
|        | DRAEM <a href="#">Zavrtanik et al. (2021)</a>    | 61.6        | 86.9        | 89.5                 | 46.7        | 0.5         | 1.0                  | 22.5        | 0.5         | 48.5        |
|        | SimpleNet <a href="#">Liu et al. (2023)</a>      | 70.0        | 90.5        | 90.1                 | 92.2        | 5.5         | 11.0                 | 73.3        | 5.8         | 64.5        |
|        | Emb.                                             |             |             |                      |             |             |                      |             |             |             |
|        | CFA <a href="#">Lee et al. (2022)</a>            | 49.9        | 81.6        | 89.1                 | 67.4        | 1.2         | 5.7                  | 39.0        | 2.9         | 50.9        |
|        | PatchCore <a href="#">Roth et al. (2022)</a>     | 75.2        | 92.7        | 91.2                 | 98.2        | 26.4        | 32.4                 | 93.3        | 19.3        | 74.5        |
|        | CFLOW-AD <a href="#">Gudovskiy et al. (2022)</a> | 72.2        | 91.3        | 90.4                 | 97.9        | 17.1        | 18.9                 | 92.1        | 10.4        | 70.6        |
|        | PyramidalFlow <a href="#">Lei et al. (2023)</a>  | 62.0        | 86.7        | 89.8                 | 96.4        | 6.6         | 11.0                 | 87.3        | 5.8         | 64.9        |
|        | Rec.                                             |             |             |                      |             |             |                      |             |             |             |
|        | RD <a href="#">Deng &amp; Li (2022)</a>          | 64.0        | 85.0        | 91.6                 | 98.4        | 15.6        | 21.7                 | 93.7        | 12.2        | 68.8        |
|        | DiAD <a href="#">He et al. (2024b)</a>           | <b>92.4</b> | 93.5        | <b>99.1</b>          | 95.5        | 4.4         | 8.0                  | 84.9        | 4.2         | 68.3        |
|        | ViTAD <a href="#">Zhang et al. (2023a)</a>       | 66.6        | 88.8        | 89.1                 | 98.1        | 19.5        | 25.2                 | 92.5        | 14.4        | 70.2        |
|        | InvAD <a href="#">Zhang et al. (2024a)</a>       | <u>90.4</u> | <b>97.3</b> | <u>94.1</u>          | <u>99.3</u> | 41.3        | <b>46.5</b>          | <u>97.1</u> | <b>30.3</b> | <b>82.5</b> |
|        | InvAD-lite <a href="#">Zhang et al. (2024a)</a>  | 85.4        | 95.3        | <u>94.1</u>          | <u>99.3</u> | <u>42.8</u> | <u>44.0</u>          | <u>97.2</u> | 28.2        | 81.2        |
|        | MambaAD <a href="#">He et al. (2024a)</a>        | 89.3        | <u>97.1</u> | 93.4                 | <b>99.4</b> | <u>42.9</u> | <u>44.0</u>          | <b>97.5</b> | 28.2        | 82.1        |
|        | Hybrid                                           |             |             |                      |             |             |                      |             |             |             |
|        | UniAD <a href="#">You et al. (2022)</a>          | 73.7        | 91.8        | 90.4                 | 98.0        | 19.6        | 25.5                 | 92.5        | 14.6        | 72.1        |
|        | RD++ <a href="#">Tien et al. (2023)</a>          | 74.2        | 89.8        | 92.0                 | <u>98.8</u> | 26.2        | 31.7                 | 94.8        | 18.8        | 74.1        |
|        | DesTSeg <a href="#">Zhang et al. (2023c)</a>     | 70.6        | 91.5        | 89.4                 | 76.7        | <b>46.7</b> | <u>45.5</u>          | 56.1        | <u>29.5</u> | 70.0        |
| potato | Aug.                                             |             |             |                      |             |             |                      |             |             |             |
|        | DRAEM <a href="#">Zavrtanik et al. (2021)</a>    | 50.1        | 80.9        | 89.8                 | 49.6        | 0.5         | 1.3                  | 30.0        | 0.6         | 47.0        |
|        | SimpleNet <a href="#">Liu et al. (2023)</a>      | 61.9        | 85.3        | 89.9                 | 95.2        | 2.6         | 5.6                  | 83.7        | 2.9         | 62.9        |
|        | Emb.                                             |             |             |                      |             |             |                      |             |             |             |
|        | CFA <a href="#">Lee et al. (2022)</a>            | 39.1        | 77.4        | 89.3                 | 64.9        | 0.3         | 1.0                  | 30.7        | 0.5         | 46.4        |
|        | PatchCore <a href="#">Roth et al. (2022)</a>     | 56.8        | 83.9        | 90.2                 | 98.9        | 9.8         | 17.0                 | 96.0        | 9.3         | 66.2        |
|        | CFLOW-AD <a href="#">Gudovskiy et al. (2022)</a> | 62.0        | 86.8        | 89.3                 | 98.5        | 11.4        | 13.9                 | 95.3        | 7.5         | 67.1        |
|        | PyramidalFlow <a href="#">Lei et al. (2023)</a>  | 70.7        | <u>91.2</u> | 89.8                 | 97.8        | 9.9         | 15.9                 | 92.5        | 8.6         | 69.0        |
|        | Rec.                                             |             |             |                      |             |             |                      |             |             |             |
|        | RD <a href="#">Deng &amp; Li (2022)</a>          | 63.1        | 87.6        | <b>91.1</b>          | <b>99.2</b> | 15.3        | 22.7                 | <u>96.6</u> | 12.8        | <u>69.5</u> |
|        | DiAD <a href="#">He et al. (2024b)</a>           | <b>82.2</b> | <b>95.8</b> | 90.2                 | 98.5        | 8.6         | 14.7                 | 94.8        | 7.9         | 69.3        |
|        | ViTAD <a href="#">Zhang et al. (2023a)</a>       | 58.2        | 86.7        | 89.8                 | 98.7        | 11.6        | 17.9                 | 95.1        | 9.8         | 67.0        |
|        | InvAD <a href="#">Zhang et al. (2024a)</a>       | 66.9        | 90.4        | 90.2                 | <u>99.1</u> | <b>17.8</b> | <b>24.8</b>          | 96.4        | <b>14.1</b> | <b>71.0</b> |
|        | InvAD-lite <a href="#">Zhang et al. (2024a)</a>  | 67.8        | <u>90.5</u> | <u>90.5</u>          | <u>99.1</u> | <b>17.8</b> | 22.4                 | 95.9        | 12.6        | <u>70.9</u> |
|        | MambaAD <a href="#">He et al. (2024a)</a>        | 59.1        | 86.0        | 90.2                 | 99.0        | <u>17.7</u> | <u>22.8</u>          | 95.4        | 12.8        | 68.6        |
|        | Hybrid                                           |             |             |                      |             |             |                      |             |             |             |
|        | UniAD <a href="#">You et al. (2022)</a>          | 51.6        | 83.8        | 89.3                 | 97.9        | 8.5         | 13.9                 | 92.3        | 7.5         | 64.0        |
|        | RD++ <a href="#">Tien et al. (2023)</a>          | 67.0        | 90.0        | 90.6                 | <b>99.2</b> | <u>17.5</u> | <u>23.7</u>          | <b>96.7</b> | <u>13.5</u> | 70.9        |
|        | DesTSeg <a href="#">Zhang et al. (2023c)</a>     | 58.2        | 86.8        | 90.2                 | 54.8        | 8.5         | 9.2                  | 22.5        | 4.8         | 51.1        |



Table A27: Benchmarked results on MVTec 3D dataset [Bergmann et al. \(2022b\)](#) by the suggested metrics in Sec. 3.3.

|      | Method | Image-level                                      |      |                      | Pixel-level |      |                      | mAU-PRO | mIoU-max | mAD  |      |
|------|--------|--------------------------------------------------|------|----------------------|-------------|------|----------------------|---------|----------|------|------|
|      |        | mAU-ROC                                          | mAP  | mF <sub>1</sub> -max | mAU-ROC     | mAP  | mF <sub>1</sub> -max |         |          |      |      |
| rope | Aug.   | DRAEM <a href="#">Zavrtanik et al. (2021)</a>    | 56.5 | 69.4                 | 83.6        | 43.0 | 0.5                  | 1.0     | 13.1     | 0.5  | 42.1 |
|      |        | SimpleNet <a href="#">Liu et al. (2023)</a>      | 93.3 | 97.7                 | 93.8        | 99.3 | 53.8                 | 52.4    | 93.1     | 35.5 | 84.8 |
|      | Emb.   | CFA <a href="#">Lee et al. (2022)</a>            | 92.5 | 96.8                 | 90.1        | 90.4 | 35.7                 | 44.1    | 74.5     | 28.3 | 77.2 |
|      |        | PatchCore <a href="#">Roth et al. (2022)</a>     | 96.7 | 98.7                 | 95.5        | 99.6 | 55.6                 | 56.9    | 97.4     | 39.7 | 87.2 |
|      |        | CFLOW-AD <a href="#">Gudovskiy et al. (2022)</a> | 94.1 | 97.7                 | 92.2        | 99.3 | 45.1                 | 47.3    | 95.3     | 31.0 | 83.2 |
|      |        | PyramidalFlow <a href="#">Lei et al. (2023)</a>  | 79.7 | 90.9                 | 83.2        | 86.4 | 8.0                  | 11.9    | 61.3     | 6.3  | 63.3 |
|      |        | RD <a href="#">Deng &amp; Li (2022)</a>          | 95.9 | 98.4                 | 93.1        | 99.6 | 50.6                 | 55.2    | 97.9     | 38.1 | 85.8 |
|      | Rec.   | DiAD <a href="#">He et al. (2024b)</a>           | 72.4 | 87.2                 | 81.7        | 94.3 | 9.5                  | 16.1    | 74.6     | 8.8  | 62.3 |
|      |        | ViTAD <a href="#">Zhang et al. (2023a)</a>       | 98.5 | 99.4                 | 96.4        | 98.5 | 41.7                 | 43.3    | 89.5     | 27.6 | 83.2 |
|      |        | InvAD <a href="#">Zhang et al. (2024a)</a>       | 97.0 | 98.8                 | 94.9        | 99.6 | 57.8                 | 58.9    | 97.1     | 41.7 | 87.6 |
|      |        | InvAD-lite <a href="#">Zhang et al. (2024a)</a>  | 94.5 | 98.0                 | 94.7        | 99.4 | 54.2                 | 53.0    | 96.3     | 36.1 | 85.7 |
|      |        | MambaAD <a href="#">He et al. (2024a)</a>        | 96.1 | 98.4                 | 93.2        | 99.3 | 45.1                 | 48.1    | 96.1     | 31.7 | 84.0 |
|      | Hybrid | UniAD <a href="#">You et al. (2022)</a>          | 95.9 | 98.5                 | 95.6        | 99.3 | 41.5                 | 47.8    | 96.4     | 31.4 | 84.0 |
|      |        | RD++ <a href="#">Tien et al. (2023)</a>          | 95.9 | 98.5                 | 96.3        | 99.6 | 52.7                 | 56.2    | 97.8     | 39.0 | 86.7 |
|      |        | DesTSeg <a href="#">Zhang et al. (2023c)</a>     | 92.7 | 97.2                 | 92.2        | 98.8 | 64.7                 | 62.7    | 97.2     | 45.7 | 87.4 |
| tire | Aug.   | DRAEM <a href="#">Zavrtanik et al. (2021)</a>    | 52.7 | 76.9                 | 87.4        | 40.6 | 0.1                  | 0.3     | 10.2     | 0.2  | 42.6 |
|      |        | SimpleNet <a href="#">Liu et al. (2023)</a>      | 59.5 | 85.7                 | 87.4        | 93.9 | 6.9                  | 13.1    | 78.3     | 7.0  | 62.8 |
|      | Emb.   | CFA <a href="#">Lee et al. (2022)</a>            | 70.7 | 90.8                 | 87.4        | 52.5 | 1.2                  | 5.3     | 18.9     | 2.7  | 51.2 |
|      |        | PatchCore <a href="#">Roth et al. (2022)</a>     | 80.1 | 93.6                 | 87.9        | 99.1 | 22.6                 | 31.1    | 95.8     | 18.4 | 74.7 |
|      |        | CFLOW-AD <a href="#">Gudovskiy et al. (2022)</a> | 56.1 | 83.9                 | 87.4        | 97.5 | 7.0                  | 11.2    | 90.7     | 5.9  | 63.7 |
|      |        | PyramidalFlow <a href="#">Lei et al. (2023)</a>  | 44.2 | 79.2                 | 87.4        | 93.7 | 3.7                  | 7.3     | 78.0     | 3.8  | 58.0 |
|      |        | RD <a href="#">Deng &amp; Li (2022)</a>          | 54.2 | 79.2                 | 87.4        | 99.0 | 13.5                 | 21.5    | 95.5     | 12.1 | 65.5 |
|      | Rec.   | DiAD <a href="#">He et al. (2024b)</a>           | 54.0 | 76.1                 | 87.4        | 92.5 | 3.4                  | 8.1     | 78.1     | 4.2  | 57.1 |
|      |        | ViTAD <a href="#">Zhang et al. (2023a)</a>       | 70.6 | 89.3                 | 89.6        | 97.9 | 17.4                 | 28.3    | 90.6     | 16.5 | 70.9 |
|      |        | InvAD <a href="#">Zhang et al. (2024a)</a>       | 86.2 | 95.8                 | 89.9        | 99.5 | 29.3                 | 38.2    | 97.5     | 23.6 | 78.4 |
|      |        | InvAD-lite <a href="#">Zhang et al. (2024a)</a>  | 89.0 | 96.7                 | 91.3        | 99.3 | 42.3                 | 47.4    | 96.4     | 31.1 | 81.8 |
|      |        | MambaAD <a href="#">He et al. (2024a)</a>        | 87.3 | 95.9                 | 91.1        | 99.3 | 42.1                 | 46.3    | 96.7     | 30.1 | 81.3 |
|      | Hybrid | UniAD <a href="#">You et al. (2022)</a>          | 68.8 | 87.5                 | 88.7        | 97.0 | 8.4                  | 15.4    | 87.5     | 8.4  | 66.9 |
|      |        | RD++ <a href="#">Tien et al. (2023)</a>          | 78.4 | 92.6                 | 88.7        | 99.4 | 23.6                 | 31.8    | 97.0     | 18.9 | 74.8 |
|      |        | DesTSeg <a href="#">Zhang et al. (2023c)</a>     | 78.1 | 93.0                 | 88.4        | 77.9 | 13.7                 | 18.7    | 55.7     | 10.3 | 64.0 |
| Avg  | Aug.   | DRAEM <a href="#">Zavrtanik et al. (2021)</a>    | 55.7 | 81.8                 | 88.8        | 46.6 | 0.8                  | 1.9     | 21.9     | 1.0  | 46.6 |
|      |        | SimpleNet <a href="#">Liu et al. (2023)</a>      | 75.8 | 92.3                 | 90.4        | 94.7 | 17.3                 | 23.4    | 81.0     | 13.9 | 70.1 |
|      | Emb.   | CFA <a href="#">Lee et al. (2022)</a>            | 67.1 | 89.3                 | 89.6        | 71.6 | 9.7                  | 16.1    | 43.2     | 9.3  | 58.6 |
|      |        | PatchCore <a href="#">Roth et al. (2022)</a>     | 84.1 | 95.1                 | 92.5        | 98.6 | 33.7                 | 38.5    | 94.4     | 24.5 | 78.4 |
|      |        | CFLOW-AD <a href="#">Gudovskiy et al. (2022)</a> | 73.1 | 91.0                 | 90.2        | 96.8 | 21.6                 | 26.6    | 89.0     | 15.8 | 71.6 |
|      |        | PyramidalFlow <a href="#">Lei et al. (2023)</a>  | 58.7 | 85.6                 | 88.6        | 90.8 | 7.2                  | 12.0    | 74.9     | 6.4  | 61.9 |
|      |        | RD <a href="#">Deng &amp; Li (2022)</a>          | 75.8 | 91.2                 | 91.5        | 98.4 | 29.6                 | 35.5    | 93.9     | 22.2 | 75.3 |
|      | Rec.   | DiAD <a href="#">He et al. (2024b)</a>           | 75.4 | 91.0                 | 90.9        | 91.7 | 5.3                  | 10.2    | 74.9     | 5.4  | 62.8 |
|      |        | ViTAD <a href="#">Zhang et al. (2023a)</a>       | 79.6 | 93.4                 | 91.6        | 98.0 | 27.2                 | 33.3    | 91.6     | 20.4 | 75.4 |
|      |        | InvAD <a href="#">Zhang et al. (2024a)</a>       | 86.9 | 96.2                 | 93.3        | 98.7 | 37.4                 | 42.4    | 95.2     | 27.4 | 80.3 |
|      |        | InvAD-lite <a href="#">Zhang et al. (2024a)</a>  | 84.7 | 95.6                 | 92.6        | 98.6 | 38.3                 | 41.9    | 94.2     | 26.9 | 79.6 |
|      |        | MambaAD <a href="#">He et al. (2024a)</a>        | 84.1 | 95.1                 | 92.2        | 98.6 | 36.9                 | 40.8    | 94.2     | 25.9 | 79.0 |
|      | Hybrid | UniAD <a href="#">You et al. (2022)</a>          | 75.3 | 92.1                 | 90.3        | 96.6 | 21.2                 | 27.9    | 88.9     | 16.7 | 72.3 |
|      |        | RD++ <a href="#">Tien et al. (2023)</a>          | 81.8 | 93.9                 | 92.8        | 98.5 | 34.4                 | 39.6    | 94.1     | 25.2 | 78.1 |
|      |        | DesTSeg <a href="#">Zhang et al. (2023c)</a>     | 79.1 | 93.8                 | 90.7        | 81.1 | 41.3                 | 42.7    | 64.0     | 28.4 | 72.6 |



## E DETAILED QUANTITATIVE RESULTS ON MVTEC LOCO DATASET UNDER 100 EPOCHS

Table A28: Benchmarked results on MVTEC LOCO dataset [Bergmann et al. \(2022a\)](#) by the suggested metrics in Sec. 3.3.

|               | Method | Image-level                                      |             |                      | Pixel-level |             |                      | mAU-PRO     | mIoU-max    | mAD         |
|---------------|--------|--------------------------------------------------|-------------|----------------------|-------------|-------------|----------------------|-------------|-------------|-------------|
|               |        | mAU-ROC                                          | mAP         | mF <sub>1</sub> -max | mAU-ROC     | mAP         | mF <sub>1</sub> -max |             |             |             |
| breakfast_box | Aug.   | DRAEM <a href="#">Zavrtanik et al. (2021)</a>    | 62.6        | 76.9                 | 77.2        | 50.0        | 4.4                  | 12.5        | 14.9        | 46.3        |
|               |        | SimpleNet <a href="#">Liu et al. (2023)</a>      | <b>88.9</b> | <b>94.1</b>          | <b>85.5</b> | 87.8        | <u>56.9</u>          | <u>55.3</u> | 73.0        | <u>38.3</u> |
|               | Emb.   | CFA <a href="#">Lee et al. (2022)</a>            | 64.3        | 79.1                 | 77.6        | 68.0        | 29.7                 | 28.5        | 33.9        | 56.8        |
|               |        | PatchCore <a href="#">Roth et al. (2022)</a>     | 77.1        | 88.4                 | 78.0        | 89.4        | 55.4                 | 49.3        | 76.1        | 74.4        |
|               |        | CFLOW-AD <a href="#">Gudovskiy et al. (2022)</a> | 74.9        | 86.4                 | 77.8        | 88.6        | 48.0                 | 46.5        | 71.1        | 71.6        |
|               |        | PyramidalFlow <a href="#">Lei et al. (2023)</a>  | 58.3        | 75.3                 | 77.4        | 59.7        | 44.2                 | 28.1        | 20.6        | 16.3        |
|               | Rec.   | RD <a href="#">Deng &amp; Li (2022)</a>          | 66.2        | 80.7                 | 77.2        | 83.7        | 27.1                 | 35.6        | 65.0        | 21.6        |
|               |        | DiAD <a href="#">He et al. (2024b)</a>           | 68.5        | 82.0                 | 77.2        | 84.6        | 26.3                 | 37.6        | 39.7        | 23.2        |
|               |        | ViTAD <a href="#">Zhang et al. (2023a)</a>       | 77.7        | 88.0                 | 78.8        | 89.1        | 56.1                 | 53.1        | 70.3        | 36.1        |
|               |        | InvAD <a href="#">Zhang et al. (2024a)</a>       | 82.7        | 91.1                 | <u>80.5</u> | <b>90.2</b> | <u>63.7</u>          | <b>60.8</b> | <b>79.7</b> | <b>43.6</b> |
|               |        | InvAD-lite <a href="#">Zhang et al. (2024a)</a>  | 77.1        | 87.9                 | 77.6        | 88.6        | 50.5                 | 49.0        | 77.2        | 32.5        |
|               |        | MambaAD <a href="#">He et al. (2024a)</a>        | 69.7        | 83.6                 | 77.5        | 89.1        | 54.5                 | 50.1        | 74.5        | 33.5        |
|               | Hybrid | UniAD <a href="#">You et al. (2022)</a>          | 73.1        | 85.5                 | 77.2        | 89.0        | 48.8                 | 46.2        | 71.0        | 30.1        |
|               |        | RD++ <a href="#">Tien et al. (2023)</a>          | 69.8        | 84.3                 | 77.2        | 86.8        | 41.4                 | 45.1        | 69.6        | 29.1        |
|               |        | DesTSeg <a href="#">Zhang et al. (2023c)</a>     | 85.5        | 92.7                 | 82.1        | 82.6        | <b>64.1</b>          | 59.4        | 72.6        | 42.2        |
|               | Aug.   | DRAEM <a href="#">Zavrtanik et al. (2021)</a>    | 52.1        | 74.3                 | 83.4        | 31.3        | 3.9                  | 10.1        | 7.3         | 5.3         |
|               |        | SimpleNet <a href="#">Liu et al. (2023)</a>      | 96.7        | 98.8                 | 94.8        | 91.6        | 48.9                 | 54.6        | 86.1        | 37.5        |
|               |        | CFA <a href="#">Lee et al. (2022)</a>            | 85.1        | 94.3                 | 85.4        | 73.6        | 20.3                 | 22.0        | 51.7        | 12.4        |
| juice_bottle  | Emb.   | PatchCore <a href="#">Roth et al. (2022)</a>     | 95.2        | 98.3                 | 94.1        | 89.9        | <u>56.2</u>          | <u>57.8</u> | 87.1        | <u>40.6</u> |
|               |        | CFLOW-AD <a href="#">Gudovskiy et al. (2022)</a> | 95.9        | 98.4                 | 93.6        | <b>91.7</b> | 44.1                 | 47.3        | 84.1        | 31.0        |
|               |        | PyramidalFlow <a href="#">Lei et al. (2023)</a>  | 48.6        | 74.9                 | 83.5        | 54.2        | 9.7                  | 10.1        | 24.9        | 5.3         |
|               | Rec.   | RD <a href="#">Deng &amp; Li (2022)</a>          | 90.1        | 96.6                 | 89.3        | 89.2        | 46.9                 | 47.7        | 84.4        | 31.4        |
|               |        | DiAD <a href="#">He et al. (2024b)</a>           | 97.3        | 98.8                 | 96.1        | 83.2        | 40.0                 | 42.4        | 74.9        | 26.9        |
|               |        | ViTAD <a href="#">Zhang et al. (2023a)</a>       | 90.3        | 96.4                 | 88.7        | 88.6        | 48.4                 | 49.1        | 83.4        | 32.5        |
|               |        | InvAD <a href="#">Zhang et al. (2024a)</a>       | 95.8        | <u>98.5</u>          | 94.2        | <u>90.6</u> | <u>53.9</u>          | <b>58.3</b> | <b>88.4</b> | <b>41.2</b> |
|               |        | InvAD-lite <a href="#">Zhang et al. (2024a)</a>  | 93.0        | 97.3                 | 92.7        | <u>90.6</u> | 53.4                 | <u>57.2</u> | <u>87.5</u> | 40.0        |
|               |        | MambaAD <a href="#">He et al. (2024a)</a>        | 92.0        | 97.0                 | 92.3        | 89.7        | 47.8                 | 53.2        | 85.3        | 36.3        |
|               | Hybrid | UniAD <a href="#">You et al. (2022)</a>          | 92.2        | 97.0                 | 90.5        | 90.6        | 52.5                 | 54.6        | 87.3        | 37.6        |
|               |        | RD++ <a href="#">Tien et al. (2023)</a>          | 90.6        | 96.5                 | 88.8        | 90.1        | 49.2                 | 50.9        | 85.2        | 34.2        |
|               |        | DesTSeg <a href="#">Zhang et al. (2023c)</a>     | <b>98.5</b> | <b>99.5</b>          | <b>97.2</b> | 78.8        | <b>57.0</b>          | <u>57.2</u> | 79.7        | 40.1        |
|               | Aug.   | DRAEM <a href="#">Zavrtanik et al. (2021)</a>    | 54.5        | 55.1                 | 72.8        | 52.4        | 0.8                  | 1.8         | 14.8        | 0.9         |
|               |        | SimpleNet <a href="#">Liu et al. (2023)</a>      | 74.8        | 81.8                 | 74.0        | <b>68.9</b> | <u>3.7</u>           | <u>8.8</u>  | 62.0        | <u>4.6</u>  |
|               | Emb.   | CFA <a href="#">Lee et al. (2022)</a>            | 53.7        | 63.2                 | 71.4        | 43.6        | 0.8                  | 1.7         | 22.5        | 0.9         |
|               |        | PatchCore <a href="#">Roth et al. (2022)</a>     | 74.3        | 82.8                 | 72.7        | 56.1        | 3.1                  | 7.5         | 63.6        | 3.9         |
|               |        | CFLOW-AD <a href="#">Gudovskiy et al. (2022)</a> | 60.8        | 69.1                 | 71.4        | 39.4        | 1.2                  | 3.0         | 52.4        | 1.5         |
|               |        | PyramidalFlow <a href="#">Lei et al. (2023)</a>  | 51.7        | 60.9                 | 71.4        | 58.8        | 1.3                  | 3.2         | 29.3        | 1.6         |
| pushpins      | Rec.   | RD <a href="#">Deng &amp; Li (2022)</a>          | 71.4        | 80.4                 | 71.7        | 51.2        | 2.2                  | 7.6         | 68.1        | 4.0         |
|               |        | DiAD <a href="#">He et al. (2024b)</a>           | 57.6        | 65.7                 | 73.0        | 62.8        | 1.4                  | 3.2         | 36.4        | 1.6         |
|               |        | ViTAD <a href="#">Zhang et al. (2023a)</a>       | 66.8        | 73.6                 | 72.2        | 46.1        | 2.2                  | 6.0         | 57.1        | 3.1         |
|               |        | InvAD <a href="#">Zhang et al. (2024a)</a>       | <b>81.0</b> | <b>87.4</b>          | <b>76.7</b> | 67.2        | <u>3.8</u>           | <u>9.1</u>  | <b>75.1</b> | <u>4.8</u>  |
|               |        | InvAD-lite <a href="#">Zhang et al. (2024a)</a>  | 77.9        | 84.0                 | <u>76.1</u> | 60.0        | 3.0                  | 8.4         | 67.8        | 4.4         |
|               |        | MambaAD <a href="#">He et al. (2024a)</a>        | <u>79.8</u> | <u>85.9</u>          | <u>76.3</u> | 58.8        | 2.6                  | <b>9.4</b>  | <u>72.7</u> | <b>5.0</b>  |
|               | Hybrid | UniAD <a href="#">You et al. (2022)</a>          | 63.5        | 70.1                 | 71.4        | 41.6        | 1.0                  | 3.9         | 53.8        | 2.0         |
|               |        | RD++ <a href="#">Tien et al. (2023)</a>          | 77.0        | 84.0                 | 74.6        | 52.3        | 2.5                  | 7.5         | 67.5        | 3.9         |
|               |        | DesTSeg <a href="#">Zhang et al. (2023c)</a>     | 59.9        | 71.1                 | 71.7        | 54.0        | <b>3.9</b>           | 8.2         | 42.3        | 4.3         |
|               | Aug.   | DRAEM <a href="#">Zavrtanik et al. (2021)</a>    | 53.1        | 65.9                 | 78.4        | 49.3        | 6.7                  | 13.7        | 10.1        | 7.4         |
|               |        | SimpleNet <a href="#">Liu et al. (2023)</a>      | 63.5        | 76.5                 | 78.3        | 61.2        | 10.3                 | 16.5        | 46.8        | 9.0         |
|               | Emb.   | CFA <a href="#">Lee et al. (2022)</a>            | 63.2        | 77.2                 | 78.4        | 50.2        | 7.5                  | 13.6        | 30.2        | 7.3         |
|               |        | PatchCore <a href="#">Roth et al. (2022)</a>     | <b>70.1</b> | <b>82.8</b>          | 78.2        | 72.1        | <u>13.1</u>          | 22.0        | 62.1        | <u>12.4</u> |
|               |        | CFLOW-AD <a href="#">Gudovskiy et al. (2022)</a> | 64.4        | 77.7                 | 78.4        | 68.7        | 11.2                 | 20.4        | <b>67.0</b> | 11.3        |
|               |        | PyramidalFlow <a href="#">Lei et al. (2023)</a>  | 52.7        | 68.5                 | 78.5        | 59.0        | 9.9                  | 15.6        | 35.5        | 8.5         |
|               | Rec.   | RD <a href="#">Deng &amp; Li (2022)</a>          | 66.3        | 79.8                 | 78.2        | 71.5        | <u>12.6</u>          | 21.8        | 52.1        | 12.2        |
|               |        | DiAD <a href="#">He et al. (2024b)</a>           | 57.6        | 68.1                 | <b>79.3</b> | 70.2        | 11.3                 | 21.2        | 58.5        | 11.9        |
|               |        | ViTAD <a href="#">Zhang et al. (2023a)</a>       | 65.2        | 77.7                 | 79.0        | <u>72.5</u> | <b>13.2</b>          | <u>21.9</u> | 42.2        | <u>12.3</u> |
| screw_bag     |        | InvAD <a href="#">Zhang et al. (2024a)</a>       | <u>68.5</u> | 82.1                 | 78.7        | 71.9        | <b>13.2</b>          | <u>21.9</u> | 53.0        | <u>12.3</u> |
|               |        | InvAD-lite <a href="#">Zhang et al. (2024a)</a>  | 68.2        | 79.7                 | 78.7        | 72.2        | <u>13.1</u>          | <u>21.9</u> | 49.1        | <u>12.3</u> |
|               |        | MambaAD <a href="#">He et al. (2024a)</a>        | 55.2        | 70.5                 | 78.2        | <b>73.1</b> | <b>13.2</b>          | <b>22.7</b> | 53.6        | <b>12.8</b> |
|               | Hybrid | UniAD <a href="#">You et al. (2022)</a>          | 56.9        | 69.1                 | <u>78.8</u> | 66.8        | 10.8                 | 19.2        | <u>64.8</u> | 10.6        |
|               |        | RD++ <a href="#">Tien et al. (2023)</a>          | 66.8        | 80.8                 | 78.2        | 69.4        | 12.1                 | 20.2        | 53.0        | 11.3        |
|               |        | DesTSeg <a href="#">Zhang et al. (2023c)</a>     | <u>68.4</u> | <u>81.9</u>          | 78.4        | 51.2        | 9.7                  | 13.6        | 44.0        | 7.3         |

Table A29: Benchmarked results on MVTEC LOCO dataset [Bergmann et al. \(2022a\)](#) by the suggested metrics in Sec. 3.3.

|                     | Method | Image-level                                      |             |                      | Pixel-level |             |                      | mAU-PRO     | mIoU-max    | mAD         |
|---------------------|--------|--------------------------------------------------|-------------|----------------------|-------------|-------------|----------------------|-------------|-------------|-------------|
|                     |        | mAU-ROC                                          | mAP         | mF <sub>1</sub> -max | mAU-ROC     | mAP         | mF <sub>1</sub> -max |             |             |             |
| splicing-connectors | Aug.   | DRAEM <a href="#">Zavrtanik et al. (2021)</a>    | 40.1        | 54.7                 | 76.4        | 50.4        | 6.5                  | 14.1        | 15.0        | 39.3        |
|                     |        | SimpleNet <a href="#">Liu et al. (2023)</a>      | 83.8        | 91.4                 | 81.9        | 73.2        | 25.1                 | 28.5        | 51.1        | 65.1        |
|                     | Emb.   | CFA <a href="#">Lee et al. (2022)</a>            | 66.2        | 79.3                 | 76.6        | 57.2        | 12.9                 | 15.7        | 17.4        | 49.9        |
|                     |        | PatchCore <a href="#">Roth et al. (2022)</a>     | <b>85.6</b> | <b>92.9</b>          | <b>84.4</b> | 68.1        | 21.5                 | 22.3        | 60.8        | 12.6        |
|                     |        | CFLOW-AD <a href="#">Gudovskiy et al. (2022)</a> | 79.3        | 89.3                 | 77.8        | 65.2        | 20.3                 | 22.3        | <b>73.1</b> | 12.5        |
|                     |        | PyramidalFlow <a href="#">Lei et al. (2023)</a>  | 55.9        | 67.0                 | 76.4        | 56.7        | 9.8                  | 15.7        | 18.2        | 8.5         |
|                     | Rec.   | RD <a href="#">Deng &amp; Li (2022)</a>          | 79.2        | 89.1                 | 78.0        | 58.0        | 16.3                 | 17.9        | 68.8        | 9.9         |
|                     |        | DiAD <a href="#">He et al. (2024b)</a>           | 75.7        | 83.0                 | 78.8        | 58.1        | 15.9                 | 19.6        | 32.4        | 10.9        |
|                     |        | ViTAD <a href="#">Zhang et al. (2023a)</a>       | 82.1        | 90.6                 | 79.6        | 70.5        | 23.7                 | 25.8        | 62.4        | 14.8        |
|                     |        | InvAD <a href="#">Zhang et al. (2024a)</a>       | 81.9        | 90.5                 | 79.7        | 62.2        | 20.8                 | 23.8        | 68.7        | 13.5        |
|                     |        | InvAD-lite <a href="#">Zhang et al. (2024a)</a>  | 80.8        | 89.9                 | 79.3        | 67.9        | 22.6                 | 24.5        | 65.5        | 14.0        |
|                     |        | MambaAD <a href="#">He et al. (2024a)</a>        | 82.4        | 90.7                 | 80.4        | 71.8        | 26.0                 | 26.8        | 64.9        | 15.5        |
|                     |        | UniAD <a href="#">You et al. (2022)</a>          | 80.4        | 88.7                 | 80.1        | <b>77.7</b> | <b>40.5</b>          | <b>43.2</b> | 46.5        | <b>27.5</b> |
|                     | Hybrid | RD++ <a href="#">Tien et al. (2023)</a>          | 77.7        | 88.5                 | 77.3        | 59.2        | 16.2                 | 17.5        | 68.9        | 9.6         |
|                     |        | DesTSeg <a href="#">Zhang et al. (2023c)</a>     | 77.5        | 88.1                 | 77.0        | 53.8        | <b>41.3</b>          | 14.0        | 28.4        | 7.5         |
| Avg                 | Aug.   | DRAEM <a href="#">Zavrtanik et al. (2021)</a>    | 52.5        | 65.4                 | 77.6        | 46.7        | 4.5                  | 10.4        | 12.4        | 5.6         |
|                     |        | SimpleNet <a href="#">Liu et al. (2023)</a>      | 81.6        | 88.5                 | <b>82.9</b> | <b>76.5</b> | 29.0                 | 32.7        | 63.8        | 21.2        |
|                     | Emb.   | CFA <a href="#">Lee et al. (2022)</a>            | 66.5        | 78.6                 | 77.9        | 58.5        | 14.2                 | 16.3        | 31.1        | 9.1         |
|                     |        | PatchCore <a href="#">Roth et al. (2022)</a>     | 80.5        | 89.0                 | 81.5        | 75.1        | 29.9                 | 31.8        | 69.9        | 20.4        |
|                     |        | CFLOW-AD <a href="#">Gudovskiy et al. (2022)</a> | 75.1        | 84.2                 | 79.8        | 70.7        | 25.0                 | 27.9        | 69.5        | 17.3        |
|                     |        | PyramidalFlow <a href="#">Lei et al. (2023)</a>  | 53.4        | 69.3                 | 77.5        | 57.7        | 15.0                 | 14.5        | 25.7        | 8.0         |
|                     | Rec.   | RD <a href="#">Deng &amp; Li (2022)</a>          | 74.6        | 85.3                 | 78.9        | 70.7        | 21.0                 | 26.1        | 67.7        | 15.8        |
|                     |        | DiAD <a href="#">He et al. (2024b)</a>           | 71.3        | 79.5                 | 80.9        | 71.8        | 19.0                 | 24.8        | 48.4        | 14.9        |
|                     |        | ViTAD <a href="#">Zhang et al. (2023a)</a>       | 76.4        | 85.2                 | 79.6        | 73.4        | 28.7                 | 31.2        | 63.1        | 19.8        |
|                     |        | InvAD <a href="#">Zhang et al. (2024a)</a>       | <b>82.0</b> | <b>89.9</b>          | 82.0        | 76.4        | <b>31.1</b>          | <b>34.8</b> | <b>73.0</b> | <b>23.1</b> |
|                     |        | InvAD-lite <a href="#">Zhang et al. (2024a)</a>  | 79.4        | 87.8                 | 80.9        | 75.8        | 28.5                 | 32.2        | 69.4        | 20.6        |
|                     |        | MambaAD <a href="#">He et al. (2024a)</a>        | 75.8        | 85.5                 | 81.0        | <b>76.5</b> | 28.8                 | 32.5        | 70.2        | 20.6        |
|                     |        | UniAD <a href="#">You et al. (2022)</a>          | 73.2        | 82.1                 | 79.6        | 73.1        | <b>30.7</b>          | <b>33.4</b> | 64.7        | 21.6        |
|                     | Hybrid | RD++ <a href="#">Tien et al. (2023)</a>          | 76.4        | 86.8                 | 79.2        | 71.5        | 24.3                 | 28.3        | 68.8        | 17.6        |
|                     |        | DesTSeg <a href="#">Zhang et al. (2023c)</a>     | 77.9        | 86.7                 | 81.3        | 64.1        | <b>35.2</b>          | 30.5        | 53.4        | 20.3        |

## F DETAILED QUANTITATIVE RESULTS ON VISA DATASET UNDER 100 EPOCHS

Table A30: Benchmarked results on VisA dataset [Zou et al. \(2022\)](#) by the suggested metrics in [Sec. 3.3](#).

|            | Method                                           | Image-level |             |                      | Pixel-level |             |                      | mAU-PRO     | mIoU-max    | mAD         |
|------------|--------------------------------------------------|-------------|-------------|----------------------|-------------|-------------|----------------------|-------------|-------------|-------------|
|            |                                                  | mAU-ROC     | mAP         | mF <sub>1</sub> -max | mAU-ROC     | mAP         | mF <sub>1</sub> -max |             |             |             |
| candle     | Aug.                                             |             |             |                      |             |             |                      |             |             |             |
|            | DRAEM <a href="#">Zavrtanik et al. (2021)</a>    | 36.0        | 45.5        | 66.7                 | 32.0        | 0.1         | 0.3                  | 5.5         | 0.2         | 29.4        |
|            | SimpleNet <a href="#">Liu et al. (2023)</a>      | 93.6        | 94.5        | 84.9                 | 96.4        | 9.9         | 19.9                 | 88.4        | 11.1        | 72.3        |
|            | RealNet <a href="#">Zhang et al. (2024c)</a>     | 52.7        | 57.8        | 66.7                 | 51.8        | 9.8         | 5.2                  | 28.5        | 2.7         | 41.4        |
|            | Emb.                                             |             |             |                      |             |             |                      |             |             |             |
|            | CFA <a href="#">Lee et al. (2022)</a>            | 71.8        | 73.7        | 70.6                 | 76.2        | 3.7         | 12.2                 | 59.7        | 6.5         | 55.0        |
|            | CFLOW-AD <a href="#">Gudovskiy et al. (2022)</a> | 93.0        | 93.3        | 85.3                 | 98.8        | 13.9        | 23.0                 | 93.8        | 13.0        | 74.0        |
|            | PyramidalFlow <a href="#">Lei et al. (2023)</a>  | 43.4        | 44.9        | 66.7                 | 77.9        | 0.5         | 2.3                  | 55.8        | 1.2         | 42.9        |
|            | Rec.                                             |             |             |                      |             |             |                      |             |             |             |
|            | RD <a href="#">Deng &amp; Li (2022)</a>          | 93.1        | 93.4        | 86.9                 | 99.1        | 24.2        | 35.4                 | 95.5        | 21.5        | 77.3        |
|            | DiAD <a href="#">He et al. (2024b)</a>           | 92.3        | 93.6        | 84.5                 | 80.2        | 1.0         | 4.1                  | 43.1        | 2.1         | 57.0        |
|            | ViTAD <a href="#">Zhang et al. (2023a)</a>       | 90.0        | 91.3        | 81.6                 | 96.1        | 16.2        | 27.9                 | 86.6        | 16.2        | 72.2        |
|            | InvAD <a href="#">Zhang et al. (2024a)</a>       | 95.3        | 94.8        | 90.6                 | 99.2        | 23.3        | 34.1                 | 95.8        | 20.5        | 78.3        |
|            | InvAD-lite <a href="#">Zhang et al. (2024a)</a>  | <b>97.1</b> | <b>97.2</b> | <b>92.0</b>          | 99.0        | 21.7        | 30.6                 | <b>96.0</b> | 18.1        | <b>78.6</b> |
|            | MambaAD <a href="#">He et al. (2024a)</a>        | 95.8        | 96.4        | 89.6                 | 99.0        | 21.3        | 31.5                 | 95.8        | 18.7        | 77.9        |
|            | Hybrid                                           |             |             |                      |             |             |                      |             |             |             |
|            | UniAD <a href="#">You et al. (2022)</a>          | 95.7        | 95.6        | 89.2                 | 99.0        | 24.1        | 32.8                 | 93.7        | 19.6        | 77.9        |
|            | RD++ <a href="#">Tien et al. (2023)</a>          | 92.5        | 92.9        | 87.8                 | <b>99.3</b> | 26.2        | 37.1                 | 95.5        | 22.7        | 77.8        |
|            | DesTSeg <a href="#">Zhang et al. (2023c)</a>     | 89.7        | 90.5        | 86.1                 | 79.6        | <b>41.1</b> | <b>43.9</b>          | 61.7        | <b>28.1</b> | 72.7        |
| capsules   | Aug.                                             |             |             |                      |             |             |                      |             |             |             |
|            | DRAEM <a href="#">Zavrtanik et al. (2021)</a>    | 49.0        | 68.2        | 76.9                 | 54.8        | 0.4         | 0.7                  | 20.3        | 0.3         | 41.9        |
|            | SimpleNet <a href="#">Liu et al. (2023)</a>      | 76.8        | 87.0        | 78.3                 | 95.5        | 42.0        | 45.5                 | 66.1        | 29.4        | 71.5        |
|            | RealNet <a href="#">Zhang et al. (2024c)</a>     | 72.8        | 85.0        | 77.0                 | 65.9        | 31.8        | 34.8                 | 31.8        | 21.1        | 59.7        |
|            | Emb.                                             |             |             |                      |             |             |                      |             |             |             |
|            | CFA <a href="#">Lee et al. (2022)</a>            | 56.5        | 71.2        | 77.2                 | 55.2        | 0.4         | 0.9                  | 5.9         | 0.4         | 41.9        |
|            | CFLOW-AD <a href="#">Gudovskiy et al. (2022)</a> | 54.8        | 72.8        | 76.9                 | 94.2        | 26.4        | 30.4                 | 64.3        | 17.9        | 61.0        |
|            | PyramidalFlow <a href="#">Lei et al. (2023)</a>  | 55.8        | 69.4        | 76.9                 | 86.9        | 3.3         | 8.7                  | 62.4        | 4.5         | 53.8        |
|            | Rec.                                             |             |             |                      |             |             |                      |             |             |             |
|            | RD <a href="#">Deng &amp; Li (2022)</a>          | 81.8        | 90.5        | 81.3                 | 99.3        | 60.2        | 60.7                 | 93.0        | 43.5        | 81.4        |
|            | DiAD <a href="#">He et al. (2024b)</a>           | 51.5        | 71.2        | 78.1                 | 90.6        | 2.9         | 6.5                  | 49.7        | 3.4         | 50.1        |
|            | ViTAD <a href="#">Zhang et al. (2023a)</a>       | 80.4        | 88.2        | 78.9                 | 98.2        | 31.0        | 41.6                 | 75.5        | 26.2        | 72.0        |
|            | InvAD <a href="#">Zhang et al. (2024a)</a>       | 90.1        | 94.2        | 86.8                 | <b>99.6</b> | <b>68.6</b> | <b>64.9</b>          | <b>95.0</b> | <b>48.1</b> | <b>86.2</b> |
|            | InvAD-lite <a href="#">Zhang et al. (2024a)</a>  | <b>91.7</b> | <b>94.7</b> | <b>90.1</b>          | 99.3        | 60.5        | 58.5                 | <b>95.2</b> | 41.3        | <b>85.3</b> |
|            | MambaAD <a href="#">He et al. (2024a)</a>        | 91.1        | 94.4        | 89.6                 | 99.0        | 58.4        | 56.7                 | 93.2        | 39.5        | 84.3        |
|            | Hybrid                                           |             |             |                      |             |             |                      |             |             |             |
|            | UniAD <a href="#">You et al. (2022)</a>          | 71.2        | 83.9        | 78.4                 | 97.5        | 42.2        | 45.5                 | 73.6        | 29.4        | 71.3        |
|            | RD++ <a href="#">Tien et al. (2023)</a>          | 84.3        | 91.4        | 83.5                 | 99.4        | 64.1        | 63.6                 | 93.2        | 46.6        | 83.2        |
|            | DesTSeg <a href="#">Zhang et al. (2023c)</a>     | 85.4        | 91.8        | 83.3                 | 95.9        | 39.0        | 43.6                 | 82.6        | 27.9        | 76.1        |
| cashew     | Aug.                                             |             |             |                      |             |             |                      |             |             |             |
|            | DRAEM <a href="#">Zavrtanik et al. (2021)</a>    | 84.4        | 92.9        | 84.0                 | 32.3        | 0.7         | 2.2                  | 8.7         | 1.1         | 49.0        |
|            | SimpleNet <a href="#">Liu et al. (2023)</a>      | 93.2        | 96.8        | 90.2                 | 98.6        | <b>67.8</b> | <b>65.0</b>          | 82.0        | <b>48.1</b> | <b>85.9</b> |
|            | RealNet <a href="#">Zhang et al. (2024c)</a>     | 79.8        | 89.6        | 84.5                 | 51.0        | 22.4        | 3.1                  | 19.7        | 1.6         | 54.3        |
|            | Emb.                                             |             |             |                      |             |             |                      |             |             |             |
|            | CFA <a href="#">Lee et al. (2022)</a>            | 74.9        | 88.1        | 81.0                 | 97.6        | 57.3        | 56.1                 | 76.2        | 39.0        | 76.6        |
|            | CFLOW-AD <a href="#">Gudovskiy et al. (2022)</a> | 95.8        | 98.2        | <b>93.3</b>          | 99.0        | 53.8        | 54.9                 | <b>94.6</b> | 37.9        | 85.7        |
|            | PyramidalFlow <a href="#">Lei et al. (2023)</a>  | 84.1        | 90.7        | 87.7                 | 49.7        | 0.6         | 2.2                  | 15.7        | 1.1         | 52.3        |
|            | Rec.                                             |             |             |                      |             |             |                      |             |             |             |
|            | RD <a href="#">Deng &amp; Li (2022)</a>          | 92.1        | 95.7        | 91.3                 | 91.3        | 43.8        | 49.4                 | 85.1        | 32.8        | 80.2        |
|            | DiAD <a href="#">He et al. (2024b)</a>           | 77.0        | 88.3        | 83.3                 | 85.5        | 42.4        | 46.6                 | 19.4        | 30.3        | 63.2        |
|            | ViTAD <a href="#">Zhang et al. (2023a)</a>       | 89.1        | 94.9        | 87.5                 | 98.2        | 62.5        | 61.5                 | 79.9        | 44.4        | 83.0        |
|            | InvAD <a href="#">Zhang et al. (2024a)</a>       | <b>96.1</b> | <b>98.3</b> | 93.2                 | 96.5        | 58.4        | 61.1                 | 90.6        | 44.0        | 86.3        |
|            | InvAD-lite <a href="#">Zhang et al. (2024a)</a>  | 94.1        | 97.0        | 90.8                 | 94.4        | 51.6        | 55.5                 | 90.5        | 38.4        | 83.5        |
|            | MambaAD <a href="#">He et al. (2024a)</a>        | 93.8        | 97.0        | 91.7                 | 94.0        | 46.7        | 51.7                 | 88.2        | 34.9        | 82.2        |
|            | Hybrid                                           |             |             |                      |             |             |                      |             |             |             |
|            | UniAD <a href="#">You et al. (2022)</a>          | 94.8        | 97.4        | 91.5                 | <b>99.2</b> | 61.3        | 63.9                 | 91.0        | 46.9        | <b>86.7</b> |
|            | RD++ <a href="#">Tien et al. (2023)</a>          | 93.4        | 96.3        | 92.2                 | 95.1        | 56.4        | 58.9                 | 87.2        | 41.7        | 84.2        |
|            | DesTSeg <a href="#">Zhang et al. (2023c)</a>     | 88.0        | 94.2        | 87.5                 | 85.9        | 65.9        | 62.6                 | 58.8        | 45.5        | 79.1        |
| chewinggum | Aug.                                             |             |             |                      |             |             |                      |             |             |             |
|            | DRAEM <a href="#">Zavrtanik et al. (2021)</a>    | 56.4        | 72.6        | 79.0                 | 34.4        | 0.3         | 1.1                  | 1.1         | 0.6         | 39.3        |
|            | SimpleNet <a href="#">Liu et al. (2023)</a>      | 97.4        | 98.8        | 93.8                 | 98.3        | 31.5        | 36.9                 | 75.1        | 22.6        | 78.6        |
|            | RealNet <a href="#">Zhang et al. (2024c)</a>     | 87.7        | 94.6        | 86.0                 | 72.4        | 40.0        | 42.0                 | 36.4        | 26.5        | 68.6        |
|            | Emb.                                             |             |             |                      |             |             |                      |             |             |             |
|            | CFA <a href="#">Lee et al. (2022)</a>            | 76.3        | 88.7        | 80.7                 | 95.6        | 33.1        | 36.5                 | 70.6        | 22.3        | 70.4        |
|            | CFLOW-AD <a href="#">Gudovskiy et al. (2022)</a> | 97.3        | 98.9        | 95.3                 | <b>99.2</b> | 60.3        | 60.3                 | <b>87.9</b> | 43.2        | 87.0        |
|            | PyramidalFlow <a href="#">Lei et al. (2023)</a>  | 36.3        | 63.6        | 80.0                 | 68.5        | 1.3         | 1.1                  | 39.2        | 0.6         | 43.7        |
|            | Rec.                                             |             |             |                      |             |             |                      |             |             |             |
|            | RD <a href="#">Deng &amp; Li (2022)</a>          | 95.8        | 98.0        | 92.6                 | 98.7        | 60.4        | 62.6                 | 78.7        | 45.5        | 85.3        |
|            | DiAD <a href="#">He et al. (2024b)</a>           | 82.5        | 90.9        | 83.5                 | 64.0        | 14.7        | 29.3                 | 15.7        | 17.2        | 54.4        |
|            | ViTAD <a href="#">Zhang et al. (2023a)</a>       | 95.8        | 98.0        | 93.2                 | 97.8        | 61.1        | 58.5                 | 72.2        | 41.3        | 84.0        |
|            | InvAD <a href="#">Zhang et al. (2024a)</a>       | <b>98.0</b> | <b>99.0</b> | 94.9                 | 98.7        | 60.4        | 62.8                 | 81.3        | 45.8        | 86.5        |
|            | InvAD-lite <a href="#">Zhang et al. (2024a)</a>  | 97.5        | 98.9        | 94.8                 | 98.3        | 56.0        | 57.6                 | 80.6        | 40.4        | 85.1        |
|            | MambaAD <a href="#">He et al. (2024a)</a>        | 97.4        | 98.8        | 94.7                 | 98.0        | 54.6        | 60.0                 | 80.0        | 42.8        | 85.1        |
|            | Hybrid                                           |             |             |                      |             |             |                      |             |             |             |
|            | UniAD <a href="#">You et al. (2022)</a>          | 97.4        | 98.9        | <b>96.3</b>          | 99.1        | 60.3        | 58.5                 | 85.9        | 41.4        | <b>86.7</b> |
|            | RD++ <a href="#">Tien et al. (2023)</a>          | 97.1        | 98.7        | 94.2                 | 98.7        | 58.8        | 61.8                 | 79.8        | 44.7        | 85.7        |
|            | DesTSeg <a href="#">Zhang et al. (2023c)</a>     | 96.3        | 98.6        | 95.8                 | 98.0        | <b>79.2</b> | <b>71.9</b>          | 68.9        | <b>56.1</b> | <b>88.2</b> |

Table A31: Benchmarked results on VisA dataset [Zou et al. \(2022\)](#) by the suggested metrics in [Sec. 3.3](#).

|                                               | Method                                        | Image-level                                      |                                              |                      | Pixel-level |             |                      | mAU-PRO     | mIoU-max    | mAD         |             |
|-----------------------------------------------|-----------------------------------------------|--------------------------------------------------|----------------------------------------------|----------------------|-------------|-------------|----------------------|-------------|-------------|-------------|-------------|
|                                               |                                               | mAU-ROC                                          | mAP                                          | mF <sub>1</sub> -max | mAU-ROC     | mAP         | mF <sub>1</sub> -max |             |             |             |             |
| fryum                                         | Aug.                                          | DRAEM <a href="#">Zavrtanik et al. (2021)</a>    | 46.5                                         | 68.9                 | 80.0        | 59.6        | 4.3                  | 10.3        | 32.0        | 5.4         | 45.8        |
|                                               |                                               | SimpleNet <a href="#">Liu et al. (2023)</a>      | 84.0                                         | 92.8                 | 83.6        | 94.9        | 46.2                 | 48.5        | 81.7        | 32.0        | 77.3        |
|                                               |                                               | RealNet <a href="#">Zhang et al. (2024c)</a>     | 66.2                                         | 83.4                 | 80.6        | 53.8        | 35.7                 | 10.4        | 19.2        | 5.5         | 53.3        |
|                                               | Emb.                                          | CFA <a href="#">Lee et al. (2022)</a>            | 68.7                                         | 84.0                 | 81.0        | 79.4        | 26.1                 | 32.5        | 49.8        | 19.4        | 62.4        |
|                                               |                                               | CFLOW-AD <a href="#">Gudovskiy et al. (2022)</a> | 90.1                                         | 95.5                 | 88.3        | <b>97.5</b> | <b>53.6</b>          | <b>53.3</b> | 87.4        | <b>36.3</b> | 82.1        |
|                                               |                                               | PyramidalFlow <a href="#">Lei et al. (2023)</a>  | 68.7                                         | 83.5                 | 81.0        | 81.7        | 12.7                 | 19.0        | 62.7        | 10.5        | 60.9        |
|                                               | Rec.                                          | RD <a href="#">Deng &amp; Li (2022)</a>          | 95.4                                         | 97.9                 | <b>92.5</b> | 96.9        | 47.5                 | 51.6        | <b>93.2</b> | 34.8        | <b>83.8</b> |
|                                               |                                               | DiAD <a href="#">He et al. (2024b)</a>           | 83.7                                         | 92.6                 | 84.3        | 97.1        | <b>55.7</b>          | <b>58.1</b> | 69.0        | <b>40.9</b> | 77.2        |
|                                               |                                               | ViTAD <a href="#">Zhang et al. (2023a)</a>       | 93.9                                         | 97.2                 | 90.6        | 97.4        | 46.4                 | 50.3        | 88.7        | 33.6        | 82.3        |
|                                               |                                               | InvAD <a href="#">Zhang et al. (2024a)</a>       | <b>96.0</b>                                  | <b>98.2</b>          | 91.9        | 97.0        | 48.5                 | 52.5        | 92.1        | 35.6        | <b>83.9</b> |
|                                               |                                               | InvAD-lite <a href="#">Zhang et al. (2024a)</a>  | 95.6                                         | 98.0                 | 90.9        | 96.8        | 47.2                 | 51.6        | 92.8        | 34.7        | 83.5        |
|                                               | Hybrid                                        | MambaAD <a href="#">He et al. (2024a)</a>        | 95.5                                         | 97.8                 | 91.5        | 97.0        | 48.3                 | 51.7        | 92.3        | 34.9        | 83.6        |
|                                               |                                               | UniAD <a href="#">You et al. (2022)</a>          | 86.0                                         | 93.4                 | 85.7        | 97.2        | 46.3                 | <b>53.1</b> | 81.9        | 36.2        | 79.0        |
|                                               |                                               | RD++ <a href="#">Tien et al. (2023)</a>          | 94.8                                         | 97.8                 | 91.9        | 96.9        | 47.3                 | 52.7        | 92.5        | 35.8        | <b>83.6</b> |
|                                               | macaroni1                                     | Aug.                                             | DesTSeg <a href="#">Zhang et al. (2023c)</a> | 92.2                 | 96.6        | 88.8        | 68.9                 | 48.9        | 43.8        | 49.2        | 28.0        |
| DRAEM <a href="#">Zavrtanik et al. (2021)</a> |                                               |                                                  | 53.4                                         | 47.5                 | 64.6        | 22.3        | 0.0                  | 0.1         | 2.6         | 0.0         | 30.7        |
| SimpleNet <a href="#">Liu et al. (2023)</a>   |                                               |                                                  | 77.4                                         | 75.7                 | 71.4        | 97.0        | 3.8                  | 10.6        | 87.0        | 5.6         | 62.2        |
| Emb.                                          |                                               | RealNet <a href="#">Zhang et al. (2024c)</a>     | 76.2                                         | 81.5                 | 72.0        | 60.1        | 13.2                 | 19.7        | 27.5        | 10.9        | 53.3        |
|                                               |                                               | CFA <a href="#">Lee et al. (2022)</a>            | 57.9                                         | 61.6                 | 68.1        | 73.5        | 0.4                  | 2.7         | 58.8        | 1.4         | 48.2        |
|                                               |                                               | CFLOW-AD <a href="#">Gudovskiy et al. (2022)</a> | 80.6                                         | 77.5                 | 75.3        | 99.1        | 7.6                  | 13.3        | 94.9        | 7.1         | 65.8        |
| Rec.                                          |                                               | PyramidalFlow <a href="#">Lei et al. (2023)</a>  | 41.9                                         | 43.4                 | 66.0        | 81.2        | 0.1                  | 0.2         | 39.9        | 0.1         | 40.4        |
|                                               |                                               | RD <a href="#">Deng &amp; Li (2022)</a>          | 94.8                                         | 92.8                 | 88.9        | <b>99.8</b> | <b>23.8</b>          | <b>31.1</b> | <b>97.4</b> | 18.4        | <b>77.6</b> |
|                                               |                                               | DiAD <a href="#">He et al. (2024b)</a>           | <b>97.9</b>                                  | <b>97.2</b>          | 92.1        | 54.1        | 0.0                  | 0.1         | 3.3         | 0.0         | 49.3        |
|                                               |                                               | ViTAD <a href="#">Zhang et al. (2023a)</a>       | 84.8                                         | 82.5                 | 75.4        | 98.5        | 7.2                  | 16.0        | 90.2        | 8.7         | 66.9        |
|                                               |                                               | InvAD <a href="#">Zhang et al. (2024a)</a>       | 94.3                                         | 92.8                 | 87.1        | 99.7        | 21.7                 | 30.1        | <b>97.4</b> | 17.7        | <b>76.8</b> |
| Hybrid                                        |                                               | InvAD-lite <a href="#">Zhang et al. (2024a)</a>  | 92.9                                         | 90.4                 | 86.0        | 99.7        | 18.6                 | 25.6        | 97.2        | 14.7        | 75.0        |
|                                               |                                               | MambaAD <a href="#">He et al. (2024a)</a>        | 91.5                                         | 89.6                 | 82.3        | 99.5        | 17.6                 | 26.1        | 96.0        | 15.0        | 73.8        |
|                                               |                                               | UniAD <a href="#">You et al. (2022)</a>          | 84.2                                         | 81.4                 | 77.0        | 99.0        | 8.0                  | 16.4        | 94.0        | 8.9         | 67.6        |
| macaroni2                                     |                                               | Aug.                                             | RD++ <a href="#">Tien et al. (2023)</a>      | 93.4                 | 91.6        | 86.0        | 99.7                 | <b>24.1</b> | <b>34.2</b> | 96.9        | <b>20.7</b> |
|                                               | DesTSeg <a href="#">Zhang et al. (2023c)</a>  |                                                  | 95.2                                         | 93.3                 | <b>92.7</b> | 79.7        | 15.7                 | 24.4        | 46.2        | 13.9        | 67.6        |
|                                               | DRAEM <a href="#">Zavrtanik et al. (2021)</a> |                                                  | 52.3                                         | 51.5                 | 62.8        | 48.7        | 0.0                  | 0.1         | 12.2        | 0.0         | 35.4        |
|                                               | Emb.                                          | SimpleNet <a href="#">Liu et al. (2023)</a>      | 66.7                                         | 61.2                 | 66.9        | 90.9        | 0.7                  | 4.2         | 79.1        | 2.2         | 54.3        |
|                                               |                                               | RealNet <a href="#">Zhang et al. (2024c)</a>     | 57.6                                         | 57.5                 | 69.4        | 51.4        | 5.3                  | 3.6         | 16.0        | 1.8         | 40.3        |
|                                               |                                               | CFA <a href="#">Lee et al. (2022)</a>            | 50.9                                         | 51.1                 | 67.6        | 79.0        | 0.2                  | 1.6         | 52.5        | 0.8         | 44.9        |
|                                               | Rec.                                          | CFLOW-AD <a href="#">Gudovskiy et al. (2022)</a> | 64.3                                         | 62.7                 | 66.2        | 97.2        | 1.5                  | 5.5         | 88.2        | 2.8         | 56.2        |
|                                               |                                               | PyramidalFlow <a href="#">Lei et al. (2023)</a>  | 67.8                                         | 71.0                 | 69.2        | 63.9        | 0.0                  | 0.1         | 8.3         | 0.0         | 43.7        |
|                                               |                                               | RD <a href="#">Deng &amp; Li (2022)</a>          | <b>87.4</b>                                  | <b>83.0</b>          | <b>82.8</b> | <b>99.6</b> | <b>12.8</b>          | <b>22.4</b> | 97.2        | <b>12.6</b> | <b>71.2</b> |
|                                               |                                               | DiAD <a href="#">He et al. (2024b)</a>           | 50.6                                         | 42.5                 | 63.4        | 56.2        | 0.0                  | 0.1         | 12.3        | 0.0         | 32.1        |
|                                               |                                               | ViTAD <a href="#">Zhang et al. (2023a)</a>       | 77.1                                         | 69.9                 | 71.4        | 98.0        | 3.4                  | 9.1         | 87.5        | 4.8         | 61.1        |
|                                               | Hybrid                                        | InvAD <a href="#">Zhang et al. (2024a)</a>       | 85.9                                         | 81.9                 | <b>81.2</b> | <b>99.6</b> | 10.8                 | 18.1        | 97.4        | 10.0        | <b>69.7</b> |
|                                               |                                               | InvAD-lite <a href="#">Zhang et al. (2024a)</a>  | <b>86.5</b>                                  | <b>83.0</b>          | 80.4        | <b>99.6</b> | <b>10.9</b>          | 17.9        | <b>97.9</b> | 9.8         | <b>69.9</b> |
|                                               |                                               | MambaAD <a href="#">He et al. (2024a)</a>        | 84.5                                         | 80.6                 | 77.1        | 99.5        | 8.8                  | 16.9        | 96.5        | 9.2         | 68.1        |
|                                               | pebl                                          | Aug.                                             | UniAD <a href="#">You et al. (2022)</a>      | 76.5                 | 76.6        | 69.4        | 97.3                 | 5.0         | 12.4        | 88.0        | 6.6         |
| RD++ <a href="#">Tien et al. (2023)</a>       |                                               |                                                  | 83.7                                         | 78.6                 | 77.8        | <b>99.5</b> | 10.3                 | <b>18.7</b> | 96.3        | <b>10.3</b> | 68.1        |
| DesTSeg <a href="#">Zhang et al. (2023c)</a>  |                                               |                                                  | 70.6                                         | 70.0                 | 71.7        | 69.2        | <b>11.3</b>          | <b>19.1</b> | 44.7        | <b>10.6</b> | 53.4        |
| Emb.                                          |                                               | DRAEM <a href="#">Zavrtanik et al. (2021)</a>    | 56.1                                         | 52.2                 | 68.4        | 33.6        | 0.3                  | 0.9         | 11.4        | 0.5         | 35.2        |
|                                               |                                               | SimpleNet <a href="#">Liu et al. (2023)</a>      | 92.8                                         | 93.9                 | 87.9        | 98.7        | <b>80.0</b>          | <b>74.9</b> | 78.9        | <b>59.8</b> | 87.3        |
|                                               |                                               | RealNet <a href="#">Zhang et al. (2024c)</a>     | 76.6                                         | 79.6                 | 71.2        | 70.5        | 36.9                 | 41.9        | 25.1        | 26.5        | 59.7        |
| Rec.                                          |                                               | CFA <a href="#">Lee et al. (2022)</a>            | 80.9                                         | 81.5                 | 75.6        | 93.0        | 62.4                 | 65.3        | 46.0        | 48.5        | 73.0        |
|                                               |                                               | CFLOW-AD <a href="#">Gudovskiy et al. (2022)</a> | 93.5                                         | 93.5                 | 86.5        | 99.1        | 72.4                 | 68.7        | 87.8        | 52.3        | 86.6        |
|                                               |                                               | PyramidalFlow <a href="#">Lei et al. (2023)</a>  | 83.3                                         | 80.9                 | 82.1        | 92.8        | 49.3                 | 45.5        | 40.5        | 29.5        | 69.6        |
|                                               |                                               | RD <a href="#">Deng &amp; Li (2022)</a>          | 54.8                                         | 47.6                 | 74.9        | 98.6        | 18.8                 | 38.3        | 92.5        | 23.7        | 60.6        |
|                                               |                                               | DiAD <a href="#">He et al. (2024b)</a>           | 92.8                                         | <b>95.3</b>          | <b>94.5</b> | 96.6        | 27.9                 | 38.4        | 60.8        | 23.8        | 72.3        |
| Hybrid                                        |                                               | ViTAD <a href="#">Zhang et al. (2023a)</a>       | 95.3                                         | 93.7                 | 90.7        | <b>99.4</b> | 63.2                 | 61.1        | 89.0        | 43.9        | 85.7        |
|                                               |                                               | InvAD <a href="#">Zhang et al. (2024a)</a>       | <b>96.5</b>                                  | <b>96.1</b>          | 93.1        | <b>99.8</b> | <b>81.3</b>          | <b>75.9</b> | <b>96.1</b> | <b>61.2</b> | <b>91.8</b> |
|                                               |                                               | InvAD-lite <a href="#">Zhang et al. (2024a)</a>  | 96.2                                         | 94.4                 | <b>93.7</b> | <b>99.8</b> | <b>79.3</b>          | <b>73.2</b> | <b>96.1</b> | 57.8        | 90.9        |
| Hybrid                                        |                                               | MambaAD <a href="#">He et al. (2024a)</a>        | 95.7                                         | 94.5                 | <b>93.3</b> | <b>99.8</b> | 79.0                 | 72.9        | 94.3        | 57.4        | 90.5        |
|                                               | UniAD <a href="#">You et al. (2022)</a>       | 94.4                                             | 93.1                                         | 91.1                 | 99.3        | 62.9        | 59.9                 | 89.1        | 42.8        | 85.3        |             |
|                                               | RD++ <a href="#">Tien et al. (2023)</a>       | <b>96.6</b>                                      | <b>96.2</b>                                  | 91.7                 | <b>99.3</b> | 67.7        | 61.0                 | <b>95.2</b> | 43.9        | 87.8        |             |
|                                               | DesTSeg <a href="#">Zhang et al. (2023c)</a>  | 82.7                                             | 81.2                                         | 77.0                 | 96.3        | 70.0        | 66.4                 | 71.9        | 49.7        | 78.2        |             |

Table A32: Benchmarked results on VisA dataset Zou et al. (2022) by the suggested metrics in Sec. 3.3.

|            | Method | Image-level                      |      |                      | Pixel-level |      |                      | mAU-PRO | mIoU-max | mAD  |      |
|------------|--------|----------------------------------|------|----------------------|-------------|------|----------------------|---------|----------|------|------|
|            |        | mAU-ROC                          | mAP  | mF <sub>1</sub> -max | mAU-ROC     | mAP  | mF <sub>1</sub> -max |         |          |      |      |
| pcb2       | Aug.   | DRAEM Zavrtanik et al. (2021)    | 59.6 | 70.8                 | 66.7        | 38.0 | 0.1                  | 0.4     | 7.3      | 0.2  | 38.6 |
|            |        | SimpleNet Liu et al. (2023)      | 90.1 | 91.8                 | 83.4        | 96.6 | 13.9                 | 23.5    | 80.6     | 13.3 | 71.0 |
|            |        | RealNet Zhang et al. (2024c)     | 71.6 | 78.8                 | 67.4        | 64.1 | 12.9                 | 19.8    | 32.7     | 11.0 | 52.5 |
|            | Emb.   | CFA Lee et al. (2022)            | 74.3 | 75.9                 | 71.5        | 74.7 | 6.5                  | 14.9    | 46.5     | 8.1  | 54.8 |
|            |        | CFLOW-AD Gudovskiy et al. (2022) | 92.4 | 93.0                 | 85.8        | 96.6 | 12.5                 | 18.7    | 82.3     | 10.3 | 71.5 |
|            |        | PyramidalFlow Lei et al. (2023)  | 72.8 | 76.3                 | 70.8        | 93.9 | 8.8                  | 15.9    | 71.9     | 8.7  | 60.5 |
|            | Rec.   | RD Deng & Li (2022)              | 97.3 | 96.9                 | 94.1        | 97.8 | 22.1                 | 30.0    | 91.6     | 17.6 | 78.2 |
|            |        | DiAD He et al. (2024b)           | 97.7 | 98.0                 | 92.8        | 83.8 | 3.8                  | 9.9     | 50.9     | 5.2  | 62.4 |
|            |        | ViTAD Zhang et al. (2023a)       | 90.2 | 89.4                 | 85.4        | 97.9 | 12.9                 | 21.0    | 82.7     | 11.7 | 71.0 |
|            |        | InvAD Zhang et al. (2024a)       | 97.0 | 97.1                 | 93.1        | 99.1 | 16.1                 | 23.8    | 92.5     | 13.5 | 76.8 |
|            |        | InvAD-lite Zhang et al. (2024a)  | 94.7 | 94.7                 | 89.9        | 98.9 | 12.9                 | 23.0    | 91.4     | 13.0 | 74.8 |
|            |        | MambaAD He et al. (2024a)        | 95.2 | 95.0                 | 90.2        | 98.8 | 13.9                 | 24.1    | 90.0     | 13.7 | 75.1 |
|            | Hybrid | UniAD You et al. (2022)          | 90.8 | 91.5                 | 85.4        | 97.9 | 9.0                  | 17.3    | 83.6     | 9.4  | 70.6 |
|            |        | RD++ Tien et al. (2023)          | 98.3 | 98.5                 | 94.9        | 97.9 | 28.6                 | 34.6    | 91.1     | 20.9 | 80.1 |
|            |        | DesTSeg Zhang et al. (2023c)     | 90.1 | 89.1                 | 83.0        | 93.6 | 20.9                 | 29.6    | 66.3     | 17.4 | 70.0 |
| pcb3       | Aug.   | DRAEM Zavrtanik et al. (2021)    | 36.1 | 46.1                 | 66.4        | 38.5 | 0.2                  | 0.5     | 7.9      | 0.3  | 30.7 |
|            |        | SimpleNet Liu et al. (2023)      | 86.4 | 88.3                 | 78.0        | 97.6 | 19.7                 | 27.7    | 80.8     | 16.1 | 70.3 |
|            |        | RealNet Zhang et al. (2024c)     | 78.8 | 84.0                 | 72.5        | 71.5 | 29.8                 | 36.6    | 35.7     | 22.4 | 60.9 |
|            | Emb.   | CFA Lee et al. (2022)            | 63.0 | 68.7                 | 66.9        | 85.5 | 11.5                 | 20.3    | 39.6     | 11.3 | 52.7 |
|            |        | CFLOW-AD Gudovskiy et al. (2022) | 80.5 | 83.6                 | 73.6        | 96.3 | 22.6                 | 26.8    | 80.3     | 15.4 | 67.9 |
|            |        | PyramidalFlow Lei et al. (2023)  | 53.8 | 56.4                 | 66.4        | 56.4 | 0.5                  | 2.7     | 7.6      | 1.3  | 37.8 |
|            | Rec.   | RD Deng & Li (2022)              | 96.2 | 96.1                 | 90.7        | 98.0 | 25.3                 | 34.8    | 93.6     | 21.1 | 78.6 |
|            |        | DiAD He et al. (2024b)           | 94.2 | 93.8                 | 89.1        | 88.5 | 3.8                  | 10.2    | 48.0     | 5.4  | 61.1 |
|            |        | ViTAD Zhang et al. (2023a)       | 90.4 | 90.6                 | 84.6        | 98.2 | 23.5                 | 29.6    | 87.9     | 17.4 | 74.2 |
|            |        | InvAD Zhang et al. (2024a)       | 96.6 | 97.0                 | 92.1        | 99.2 | 17.3                 | 28.7    | 93.1     | 16.8 | 77.4 |
|            |        | InvAD-lite Zhang et al. (2024a)  | 93.8 | 94.3                 | 86.1        | 99.1 | 17.6                 | 28.2    | 92.6     | 16.4 | 75.4 |
|            |        | MambaAD He et al. (2024a)        | 95.0 | 95.2                 | 88.8        | 99.1 | 21.7                 | 27.6    | 92.0     | 16.0 | 76.5 |
|            | Hybrid | UniAD You et al. (2022)          | 82.8 | 83.8                 | 76.9        | 98.2 | 13.6                 | 24.1    | 80.9     | 13.7 | 67.7 |
|            |        | RD++ Tien et al. (2023)          | 95.7 | 95.8                 | 89.9        | 98.0 | 33.2                 | 35.6    | 93.7     | 21.6 | 79.5 |
|            |        | DesTSeg Zhang et al. (2023c)     | 93.4 | 94.1                 | 87.3        | 89.9 | 31.9                 | 33.6    | 56.9     | 20.2 | 72.3 |
| pcb4       | Aug.   | DRAEM Zavrtanik et al. (2021)    | 68.0 | 58.0                 | 76.4        | 32.8 | 0.5                  | 1.3     | 6.6      | 0.7  | 38.9 |
|            |        | SimpleNet Liu et al. (2023)      | 97.6 | 97.8                 | 92.0        | 95.2 | 22.1                 | 30.9    | 79.0     | 18.2 | 76.3 |
|            |        | RealNet Zhang et al. (2024c)     | 72.5 | 79.2                 | 68.3        | 58.3 | 28.0                 | 23.1    | 24.0     | 13.1 | 53.3 |
|            | Emb.   | CFA Lee et al. (2022)            | 72.5 | 75.7                 | 69.8        | 75.2 | 10.0                 | 19.1    | 44.2     | 10.6 | 54.9 |
|            |        | CFLOW-AD Gudovskiy et al. (2022) | 98.5 | 98.4                 | 96.1        | 96.7 | 21.9                 | 30.9    | 85.4     | 18.3 | 78.2 |
|            |        | PyramidalFlow Lei et al. (2023)  | 48.9 | 52.7                 | 66.4        | 89.5 | 5.0                  | 8.9     | 66.3     | 4.7  | 49.2 |
|            | Rec.   | RD Deng & Li (2022)              | 100. | 100.                 | 99.5        | 97.8 | 30.2                 | 36.0    | 89.2     | 22.0 | 81.6 |
|            |        | DiAD He et al. (2024b)           | 99.7 | 99.7                 | 99.0        | 95.4 | 9.9                  | 18.2    | 83.5     | 10.0 | 72.2 |
|            |        | ViTAD Zhang et al. (2023a)       | 99.1 | 98.7                 | 97.0        | 99.0 | 42.8                 | 47.9    | 93.4     | 31.5 | 84.5 |
|            |        | InvAD Zhang et al. (2024a)       | 99.8 | 99.8                 | 98.0        | 98.6 | 46.6                 | 45.1    | 91.1     | 29.2 | 84.8 |
|            |        | InvAD-lite Zhang et al. (2024a)  | 99.8 | 99.8                 | 98.0        | 98.7 | 50.6                 | 49.4    | 90.8     | 32.8 | 85.8 |
|            |        | MambaAD He et al. (2024a)        | 99.6 | 99.7                 | 97.0        | 98.7 | 47.4                 | 47.6    | 90.8     | 31.2 | 84.9 |
|            | Hybrid | UniAD You et al. (2022)          | 99.2 | 99.2                 | 95.5        | 97.1 | 29.1                 | 33.7    | 83.1     | 20.3 | 79.4 |
|            |        | RD++ Tien et al. (2023)          | 100. | 100.                 | 99.0        | 97.4 | 32.8                 | 38.7    | 86.8     | 24.0 | 81.8 |
|            |        | DesTSeg Zhang et al. (2023c)     | 98.8 | 98.7                 | 95.1        | 94.3 | 53.4                 | 52.2    | 74.3     | 35.3 | 83.0 |
| pipe.fryum | Aug.   | DRAEM Zavrtanik et al. (2021)    | 63.5 | 74.5                 | 83.1        | 22.9 | 0.7                  | 2.5     | 4.9      | 1.2  | 40.7 |
|            |        | SimpleNet Liu et al. (2023)      | 80.7 | 90.9                 | 83.2        | 98.8 | 70.8                 | 66.2    | 71.3     | 49.5 | 80.9 |
|            |        | RealNet Zhang et al. (2024c)     | 64.0 | 83.5                 | 80.5        | 61.3 | 43.2                 | 31.4    | 32.3     | 18.6 | 59.0 |
|            | Emb.   | CFA Lee et al. (2022)            | 48.2 | 71.5                 | 80.0        | 90.9 | 53.7                 | 52.7    | 59.2     | 35.8 | 65.3 |
|            |        | CFLOW-AD Gudovskiy et al. (2022) | 97.4 | 98.8                 | 96.0        | 99.2 | 60.8                 | 61.3    | 94.6     | 44.2 | 88.2 |
|            |        | PyramidalFlow Lei et al. (2023)  | 41.6 | 63.3                 | 80.0        | 81.3 | 4.7                  | 9.1     | 43.0     | 4.8  | 48.1 |
|            | Rec.   | RD Deng & Li (2022)              | 98.1 | 99.0                 | 96.5        | 99.1 | 55.8                 | 58.2    | 96.3     | 41.1 | 87.6 |
|            |        | DiAD He et al. (2024b)           | 97.4 | 98.5                 | 98.0        | 98.6 | 52.5                 | 57.1    | 78.4     | 40.0 | 82.9 |
|            |        | ViTAD Zhang et al. (2023a)       | 98.1 | 99.1                 | 95.5        | 99.5 | 67.0                 | 67.2    | 95.0     | 50.6 | 89.9 |
|            |        | InvAD Zhang et al. (2024a)       | 99.2 | 99.6                 | 97.5        | 99.4 | 66.3                 | 64.7    | 94.8     | 47.9 | 90.0 |
|            |        | InvAD-lite Zhang et al. (2024a)  | 98.6 | 99.3                 | 96.0        | 99.0 | 55.3                 | 57.4    | 95.7     | 40.2 | 87.4 |
|            |        | MambaAD He et al. (2024a)        | 99.0 | 99.5                 | 97.0        | 99.0 | 53.9                 | 57.5    | 95.6     | 40.3 | 87.5 |
|            | Hybrid | UniAD You et al. (2022)          | 95.5 | 97.7                 | 92.9        | 99.0 | 52.1                 | 58.2    | 93.3     | 41.1 | 85.5 |
|            |        | RD++ Tien et al. (2023)          | 96.8 | 98.3                 | 94.1        | 99.0 | 57.6                 | 58.8    | 95.4     | 41.6 | 87.0 |
|            |        | DesTSeg Zhang et al. (2023c)     | 96.3 | 98.4                 | 92.1        | 88.8 | 81.4                 | 75.2    | 51.5     | 60.2 | 84.9 |

Table A33: Benchmarked results on VisA dataset Zou et al. (2022) by the suggested metrics in Sec. 3.3.

| Method |        | Image-level                                      |             |                      | Pixel-level |             |                      | mAU-PRO     | mIoU-max    | mAD         |             |
|--------|--------|--------------------------------------------------|-------------|----------------------|-------------|-------------|----------------------|-------------|-------------|-------------|-------------|
|        |        | mAU-ROC                                          | mAP         | mF <sub>1</sub> -max | mAU-ROC     | mAP         | mF <sub>1</sub> -max |             |             |             |             |
| Avg    | Aug.   | DRAEM <a href="#">Zavrtanik et al. (2021)</a>    | 55.1        | 62.4                 | 72.9        | 37.5        | 0.6                  | 1.7         | 10.0        | 0.9         | 38.0        |
|        |        | SimpleNet <a href="#">Liu et al. (2023)</a>      | 86.4        | 89.1                 | 82.8        | 96.6        | 34.0                 | 37.8        | 79.2        | 25.7        | 74.0        |
|        |        | RealNet <a href="#">Zhang et al. (2024c)</a>     | 71.4        | 79.5                 | 74.7        | 61.0        | 25.7                 | 22.6        | 27.4        | 13.5        | 54.7        |
|        | Emb.   | CFA <a href="#">Lee et al. (2022)</a>            | 66.3        | 74.3                 | 74.2        | 81.3        | 22.1                 | 26.2        | 50.8        | 17.0        | 58.4        |
|        |        | CFLOW-AD <a href="#">Gudovskiy et al. (2022)</a> | 86.5        | 88.8                 | 84.9        | 97.7        | 33.9                 | 37.2        | 86.8        | 24.9        | 75.3        |
|        |        | PyramidalFlow <a href="#">Lei et al. (2023)</a>  | 58.2        | 66.3                 | 74.4        | 77.0        | 7.2                  | 9.6         | 42.8        | 5.6         | 50.2        |
|        | Rec.   | RD <a href="#">Deng &amp; Li (2022)</a>          | 90.6        | 90.9                 | 89.3        | 98.0        | 35.4                 | 42.5        | 91.9        | 27.9        | 78.6        |
|        |        | DiAD <a href="#">He et al. (2024b)</a>           | 84.8        | 88.5                 | 86.9        | 82.5        | 17.9                 | 23.2        | 44.5        | 14.9        | 61.2        |
|        |        | ViTAD <a href="#">Zhang et al. (2023a)</a>       | 90.4        | 91.1                 | 86.0        | 98.2        | 36.4                 | 41.0        | 85.7        | 27.5        | 77.2        |
|        |        | InvAD <a href="#">Zhang et al. (2024a)</a>       | <b>95.4</b> | <b>95.7</b>          | <b>91.6</b> | <b>98.9</b> | <b>43.3</b>          | <b>46.8</b> | <b>93.1</b> | <b>32.5</b> | <b>82.4</b> |
|        |        | InvAD-lite <a href="#">Zhang et al. (2024a)</a>  | 94.9        | 95.2                 | 90.7        | 98.6        | 40.2                 | 44.0        | <b>93.1</b> | 29.8        | 81.3        |
|        |        | MambaAD <a href="#">He et al. (2024a)</a>        | 94.5        | 94.9                 | 90.2        | 98.4        | 39.3                 | 43.7        | 92.1        | 29.5        | 80.8        |
|        | Hybrid | UniAD <a href="#">You et al. (2022)</a>          | 89.0        | 91.0                 | 85.8        | 98.3        | 34.5                 | 39.6        | 86.5        | 26.4        | 76.7        |
|        |        | RD++ <a href="#">Tien et al. (2023)</a>          | 93.9        | 94.7                 | 90.2        | 98.4        | 42.3                 | 46.3        | 91.9        | 31.2        | 81.3        |
|        |        | DesTSeg <a href="#">Zhang et al. (2023c)</a>     | 89.9        | 91.4                 | 86.7        | 86.7        | <b>46.6</b>          | <b>47.2</b> | 61.1        | <b>32.7</b> | 74.9        |

## G DETAILED QUANTITATIVE RESULTS ON BTAD DATASET UNDER 100 EPOCHS

Table A34: Benchmarked results on BTAD dataset [Mishra et al. \(2021\)](#) by the suggested metrics in [Sec. 3.3](#).

|     | Method | Image-level                                      |             |                      | Pixel-level |             |                      | mAU-PRO     | mIoU-max    | mAD         |
|-----|--------|--------------------------------------------------|-------------|----------------------|-------------|-------------|----------------------|-------------|-------------|-------------|
|     |        | mAU-ROC                                          | mAP         | mF <sub>1</sub> -max | mAU-ROC     | mAP         | mF <sub>1</sub> -max |             |             |             |
| 01  | Aug.   | DRAEM <a href="#">Zavrtanik et al. (2021)</a>    | 82.6        | 93.6                 | 84.7        | 47.0        | 3.0                  | 6.3         | 14.3        | 52.3        |
|     |        | SimpleNet <a href="#">Liu et al. (2023)</a>      | 98.3        | 99.4                 | 97.9        | 95.0        | 41.6                 | 45.1        | 64.7        | 80.1        |
|     |        | RealNet <a href="#">Zhang et al. (2024c)</a>     | <b>100.</b> | <b>100.</b>          | <b>100.</b> | 95.7        | <b>69.5</b>          | <b>67.6</b> | <b>81.3</b> | <b>89.3</b> |
|     | Emb.   | CFA <a href="#">Lee et al. (2022)</a>            | 98.2        | 99.4                 | 99.0        | 94.7        | 37.8                 | 44.2        | 64.6        | 79.6        |
|     |        | PatchCore <a href="#">Roth et al. (2022)</a>     | 99.6        | 99.8                 | 99.0        | 97.1        | 55.5                 | 56.6        | 75.8        | 85.4        |
|     |        | CFLOW-AD <a href="#">Gudovskiy et al. (2022)</a> | 94.8        | 98.1                 | 93.5        | 94.7        | 36.6                 | 43.4        | 66.2        | 77.8        |
|     |        | PyramidalFlow <a href="#">Lei et al. (2023)</a>  | 94.5        | 96.7                 | 98.0        | 89.2        | 18.9                 | 6.3         | 66.6        | 70.8        |
|     |        | RD <a href="#">Deng &amp; Li (2022)</a>          | 99.8        | 99.9                 | 99.0        | 97.8        | 57.5                 | 58.5        | <b>84.4</b> | 41.4        |
|     | Rec.   | DiAD <a href="#">He et al. (2024b)</a>           | 99.4        | 99.8                 | 99.0        | 90.5        | 24.3                 | 31.4        | 73.7        | 18.6        |
|     |        | ViTAD <a href="#">Zhang et al. (2023a)</a>       | 97.9        | 99.2                 | 95.9        | 96.5        | 55.0                 | 55.1        | 69.8        | 38.1        |
|     |        | InvAD <a href="#">Zhang et al. (2024a)</a>       | 99.9        | <b>100.</b>          | 99.0        | <b>98.0</b> | 63.7                 | 62.9        | <b>84.1</b> | 45.9        |
|     |        | InvAD-lite <a href="#">Zhang et al. (2024a)</a>  | 97.8        | 99.2                 | 96.9        | 97.3        | <u>59.3</u>          | <u>61.4</u> | 77.3        | 44.3        |
|     |        | MambaAD <a href="#">He et al. (2024a)</a>        | 97.4        | 99.0                 | 94.7        | 97.1        | <u>55.3</u>          | 58.1        | 76.5        | 41.0        |
|     | Hybrid | UniAD <a href="#">You et al. (2022)</a>          | 99.7        | 99.9                 | 98.0        | 97.4        | 57.2                 | 58.4        | 79.2        | 41.3        |
|     |        | RD++ <a href="#">Tien et al. (2023)</a>          | 98.6        | 99.5                 | 97.9        | <u>97.5</u> | 53.6                 | 57.8        | 80.9        | 40.6        |
|     |        | DesTSeg <a href="#">Zhang et al. (2023c)</a>     | 98.1        | 99.3                 | 96.9        | 85.8        | 25.4                 | 39.3        | 68.2        | 24.4        |
| 02  | Aug.   | DRAEM <a href="#">Zavrtanik et al. (2021)</a>    | 70.6        | 94.7                 | 92.8        | 51.7        | 7.9                  | 11.5        | 18.2        | 6.1         |
|     |        | SimpleNet <a href="#">Liu et al. (2023)</a>      | 81.7        | 96.8                 | <b>93.6</b> | 94.5        | 46.3                 | 49.4        | 47.4        | 32.8        |
|     |        | RealNet <a href="#">Zhang et al. (2024c)</a>     | 72.9        | 95.3                 | 92.8        | 83.9        | 38.8                 | 50.3        | 38.6        | 33.6        |
|     | Emb.   | CFA <a href="#">Lee et al. (2022)</a>            | 80.3        | 96.6                 | 92.8        | 94.7        | 51.2                 | 53.9        | 48.8        | 36.9        |
|     |        | PatchCore <a href="#">Roth et al. (2022)</a>     | 83.8        | 97.3                 | 92.8        | 96.0        | 59.3                 | 59.8        | 54.1        | 42.7        |
|     |        | CFLOW-AD <a href="#">Gudovskiy et al. (2022)</a> | 79.6        | 96.7                 | 92.8        | 96.4        | 61.4                 | 61.0        | 54.5        | 43.9        |
|     |        | PyramidalFlow <a href="#">Lei et al. (2023)</a>  | 73.7        | 95.6                 | 92.8        | 86.8        | 64.1                 | 62.5        | 38.0        | 45.4        |
|     |        | RD <a href="#">Deng &amp; Li (2022)</a>          | 84.0        | <u>97.3</u>          | <u>93.4</u> | <u>96.7</u> | <u>64.5</u>          | <u>64.3</u> | 58.8        | 47.4        |
|     | Rec.   | DiAD <a href="#">He et al. (2024b)</a>           | 72.6        | 95.4                 | 92.8        | 86.9        | 27.3                 | 35.5        | 44.8        | 21.6        |
|     |        | ViTAD <a href="#">Zhang et al. (2023a)</a>       | 83.5        | 97.2                 | 93.0        | <b>96.9</b> | <b>74.1</b>          | <b>67.8</b> | 51.9        | <b>51.2</b> |
|     |        | InvAD <a href="#">Zhang et al. (2024a)</a>       | <b>88.7</b> | <b>98.1</b>          | 93.5        | 96.6        | 62.0                 | 61.9        | <u>59.6</u> | 44.9        |
|     |        | InvAD-lite <a href="#">Zhang et al. (2024a)</a>  | 81.8        | 97.0                 | 93.2        | 96.6        | 61.8                 | 62.4        | <b>60.2</b> | 45.4        |
|     |        | MambaAD <a href="#">He et al. (2024a)</a>        | 82.5        | 97.2                 | 93.0        | 96.3        | 55.1                 | 60.0        | <u>59.6</u> | 42.8        |
|     | Hybrid | UniAD <a href="#">You et al. (2022)</a>          | <u>85.0</u> | <u>97.6</u>          | 92.8        | 94.8        | 41.8                 | 51.8        | <u>59.4</u> | 35.0        |
|     |        | RD++ <a href="#">Tien et al. (2023)</a>          | <u>85.5</u> | <u>97.6</u>          | 93.2        | <u>96.7</u> | <u>65.2</u>          | <u>64.2</u> | 57.2        | 47.2        |
|     |        | DesTSeg <a href="#">Zhang et al. (2023c)</a>     | 81.2        | 96.9                 | 92.8        | 94.6        | 45.9                 | 58.4        | 50.9        | 41.2        |
| 03  | Aug.   | DRAEM <a href="#">Zavrtanik et al. (2021)</a>    | 60.7        | 47.1                 | 56.5        | 48.4        | 0.3                  | 1.5         | 16.0        | 0.8         |
|     |        | SimpleNet <a href="#">Liu et al. (2023)</a>      | 99.7        | 95.7                 | 88.6        | 99.4        | 36.5                 | 38.5        | 97.5        | 23.8        |
|     |        | RealNet <a href="#">Zhang et al. (2024c)</a>     | 96.3        | 90.5                 | 85.7        | 72.2        | 36.0                 | 40.1        | 40.3        | 25.1        |
|     | Emb.   | CFA <a href="#">Lee et al. (2022)</a>            | 99.7        | 96.6                 | 88.9        | 99.4        | 53.3                 | 52.5        | 95.2        | 35.6        |
|     |        | PatchCore <a href="#">Roth et al. (2022)</a>     | <b>99.8</b> | <u>97.3</u>          | <u>92.1</u> | 99.5        | 50.1                 | 48.2        | 98.0        | 31.8        |
|     |        | CFLOW-AD <a href="#">Gudovskiy et al. (2022)</a> | 99.0        | 89.5                 | 78.6        | 99.4        | 38.8                 | 46.0        | 97.3        | 29.9        |
|     |        | PyramidalFlow <a href="#">Lei et al. (2023)</a>  | 92.9        | 57.1                 | 52.2        | 96.7        | 5.9                  | 12.0        | 87.7        | 6.4         |
|     |        | RD <a href="#">Deng &amp; Li (2022)</a>          | 99.4        | 92.5                 | 89.6        | <b>99.8</b> | <u>56.8</u>          | 54.6        | <u>98.9</u> | 37.6        |
|     | Rec.   | DiAD <a href="#">He et al. (2024b)</a>           | 98.3        | 69.9                 | 86.1        | 97.6        | 7.2                  | 13.1        | 92.7        | 7.0         |
|     |        | ViTAD <a href="#">Zhang et al. (2023a)</a>       | 99.6        | 94.2                 | 90.9        | 99.6        | 48.5                 | 47.2        | 98.0        | 30.9        |
|     |        | InvAD <a href="#">Zhang et al. (2024a)</a>       | <u>99.7</u> | 95.2                 | 90.3        | <b>99.8</b> | <b>62.0</b>          | <b>59.4</b> | <u>98.9</u> | <b>42.2</b> |
|     |        | InvAD-lite <a href="#">Zhang et al. (2024a)</a>  | 99.7        | 96.0                 | <b>93.8</b> | 99.6        | 56.5                 | <u>55.3</u> | 98.4        | 38.2        |
|     |        | MambaAD <a href="#">He et al. (2024a)</a>        | 99.5        | 92.2                 | 89.9        | 99.6        | 47.1                 | 49.9        | 98.4        | 33.2        |
|     | Hybrid | UniAD <a href="#">You et al. (2022)</a>          | <b>99.8</b> | <b>97.5</b>          | <u>91.8</u> | 99.5        | 51.9                 | 51.3        | 97.9        | 34.5        |
|     |        | RD++ <a href="#">Tien et al. (2023)</a>          | 99.7        | 96.4                 | 91.2        | <b>99.8</b> | 60.1                 | <u>57.6</u> | <b>99.0</b> | 40.4        |
|     |        | DesTSeg <a href="#">Zhang et al. (2023c)</a>     | 99.2        | 91.4                 | 87.1        | 96.3        | 33.1                 | 35.4        | 90.8        | 21.5        |
| Avg | Aug.   | DRAEM <a href="#">Zavrtanik et al. (2021)</a>    | 71.3        | 78.5                 | 78.0        | 49.0        | 3.7                  | 6.5         | 16.2        | 3.4         |
|     |        | SimpleNet <a href="#">Liu et al. (2023)</a>      | 93.2        | 97.3                 | 93.3        | 96.3        | 41.5                 | 44.3        | 69.8        | 28.6        |
|     |        | RealNet <a href="#">Zhang et al. (2024c)</a>     | 89.7        | 95.3                 | 92.8        | 84.0        | 48.1                 | 52.7        | 53.4        | 36.6        |
|     | Emb.   | CFA <a href="#">Lee et al. (2022)</a>            | 92.7        | 97.5                 | 93.5        | 96.3        | 47.4                 | 50.2        | 69.5        | 33.6        |
|     |        | PatchCore <a href="#">Roth et al. (2022)</a>     | 94.4        | <u>98.2</u>          | <b>94.6</b> | 97.5        | 55.0                 | 54.9        | 76.0        | 38.0        |
|     |        | CFLOW-AD <a href="#">Gudovskiy et al. (2022)</a> | 91.2        | 94.8                 | 88.3        | 96.8        | 45.6                 | 50.1        | 72.7        | 33.8        |
|     |        | PyramidalFlow <a href="#">Lei et al. (2023)</a>  | 87.0        | 83.1                 | 81.0        | 90.9        | 29.6                 | 26.9        | 64.1        | 18.3        |
|     |        | RD <a href="#">Deng &amp; Li (2022)</a>          | 94.4        | 96.6                 | 94.0        | <b>98.1</b> | <u>59.6</u>          | 59.2        | <u>80.7</u> | 42.1        |
|     | Rec.   | DiAD <a href="#">He et al. (2024b)</a>           | 90.1        | 88.4                 | 92.6        | 91.7        | 19.6                 | 26.7        | 70.4        | 15.7        |
|     |        | ViTAD <a href="#">Zhang et al. (2023a)</a>       | 93.6        | 96.8                 | 93.3        | 97.6        | <u>59.2</u>          | 56.7        | 73.2        | 40.1        |
|     |        | InvAD <a href="#">Zhang et al. (2024a)</a>       | <b>96.1</b> | <u>97.8</u>          | <u>94.3</u> | <b>98.1</b> | <b>62.6</b>          | <b>61.4</b> | <b>80.9</b> | <b>44.3</b> |
|     |        | InvAD-lite <a href="#">Zhang et al. (2024a)</a>  | 93.1        | 97.4                 | <b>94.6</b> | 97.9        | <u>59.2</u>          | <u>59.7</u> | 78.6        | 42.6        |
|     |        | MambaAD <a href="#">He et al. (2024a)</a>        | 93.1        | 96.1                 | 92.5        | 97.7        | 52.5                 | 56.0        | 78.2        | 39.0        |
|     | Hybrid | UniAD <a href="#">You et al. (2022)</a>          | 94.8        | <b>98.3</b>          | 94.2        | 97.2        | 50.3                 | 53.8        | 78.8        | 36.9        |
|     |        | RD++ <a href="#">Tien et al. (2023)</a>          | 94.6        | <u>97.8</u>          | 94.1        | 98.0        | 59.6                 | 59.8        | <u>79.0</u> | 42.8        |
|     |        | DesTSeg <a href="#">Zhang et al. (2023c)</a>     | 92.8        | 95.9                 | 92.3        | 92.2        | 34.8                 | 44.3        | 70.0        | 29.0        |



## H DETAILED QUANTITATIVE RESULTS ON MPDD DATASET UNDER 100 EPOCHS

Table A35: Benchmarked results on MPDD dataset [Jezek et al. \(2021\)](#) by the suggested metrics in [Sec. 3.3](#).

|               | Method                                           | Image-level |             |                      | Pixel-level |             |                      | mAU-PRO     | mIoU-max    | mAD         |
|---------------|--------------------------------------------------|-------------|-------------|----------------------|-------------|-------------|----------------------|-------------|-------------|-------------|
|               |                                                  | mAU-ROC     | mAP         | mF <sub>1</sub> -max | mAU-ROC     | mAP         | mF <sub>1</sub> -max |             |             |             |
| bracket_black | Aug.                                             |             |             |                      |             |             |                      |             |             |             |
|               | DRAEM <a href="#">Zavrtanik et al. (2021)</a>    | 39.0        | 51.7        | 74.6                 | 45.1        | 0.1         | 0.4                  | 24.0        | 0.2         | 36.2        |
|               | SimpleNet <a href="#">Liu et al. (2023)</a>      | 74.0        | 83.3        | 78.5                 | 92.8        | 3.1         | 9.7                  | 86.1        | 5.1         | 63.3        |
|               | RealNet <a href="#">Zhang et al. (2024c)</a>     | 63.0        | 72.7        | 75.2                 | 65.9        | 2.3         | 6.8                  | 50.7        | 3.5         | 50.9        |
|               | Emb.                                             |             |             |                      |             |             |                      |             |             |             |
|               | CFA <a href="#">Lee et al. (2022)</a>            | 58.4        | 72.8        | 74.6                 | 74.6        | 0.2         | 0.5                  | 31.9        | 0.2         | 47.7        |
|               | PatchCore <a href="#">Roth et al. (2022)</a>     | <b>88.4</b> | <b>92.7</b> | <b>83.9</b>          | <b>98.5</b> | <b>11.0</b> | <b>21.0</b>          | <b>96.7</b> | <b>11.8</b> | <b>72.6</b> |
|               | CFLOW-AD <a href="#">Gudovskiy et al. (2022)</a> | 60.8        | 70.3        | 75.8                 | 95.5        | 1.7         | 4.1                  | 85.2        | 2.1         | 57.8        |
|               | PyramidalFlow <a href="#">Lei et al. (2023)</a>  | 65.8        | 72.7        | 77.0                 | 95.3        | 1.8         | 5.0                  | 81.4        | 2.6         | 58.9        |
|               | Rec.                                             |             |             |                      |             |             |                      |             |             |             |
|               | RD <a href="#">Deng &amp; Li (2022)</a>          | <u>84.2</u> | <u>88.3</u> | 83.1                 | <u>97.7</u> | 6.6         | 12.7                 | <u>94.1</u> | 6.8         | <u>69.0</u> |
|               | DiAD <a href="#">He et al. (2024b)</a>           | 70.9        | 81.7        | 79.0                 | 89.8        | 0.4         | 1.0                  | 65.3        | 0.5         | 55.5        |
|               | VITAD <a href="#">Zhang et al. (2023a)</a>       | 78.3        | 86.2        | <u>83.6</u>          | 95.5        | 2.5         | 8.0                  | 89.1        | 4.2         | 65.7        |
|               | InvAD <a href="#">Zhang et al. (2024a)</a>       | 83.4        | <u>90.9</u> | 81.0                 | 97.4        | <u>7.1</u>  | <u>15.2</u>          | 94.0        | <u>8.2</u>  | <u>69.3</u> |
|               | InvAD-lite <a href="#">Zhang et al. (2024a)</a>  | 75.4        | 84.6        | 78.6                 | 95.2        | <u>7.9</u>  | <u>16.8</u>          | 89.6        | <u>9.1</u>  | <u>66.0</u> |
|               | MambaAD <a href="#">He et al. (2024a)</a>        | 81.9        | <u>88.3</u> | 81.7                 | 94.5        | 5.3         | 11.2                 | 88.4        | 5.9         | 66.9        |
|               | Hybrid                                           |             |             |                      |             |             |                      |             |             |             |
|               | UniAD <a href="#">You et al. (2022)</a>          | 78.1        | 84.9        | 79.2                 | 93.0        | 0.6         | 1.6                  | 79.2        | 0.8         | 62.2        |
|               | RD++ <a href="#">Tien et al. (2023)</a>          | 82.7        | 86.6        | 82.9                 | 98.0        | 4.2         | 10.1                 | <u>94.1</u> | 5.3         | 67.8        |
|               | DesTSeg <a href="#">Zhang et al. (2023c)</a>     | 83.4        | 87.3        | <b>85.7</b>          | 72.4        | 5.7         | 13.5                 | 59.0        | 7.3         | 61.6        |
| bracket_brown | Aug.                                             |             |             |                      |             |             |                      |             |             |             |
|               | DRAEM <a href="#">Zavrtanik et al. (2021)</a>    | 42.5        | 61.1        | 79.7                 | 46.8        | 0.8         | 1.9                  | 27.5        | 1.0         | 40.2        |
|               | SimpleNet <a href="#">Liu et al. (2023)</a>      | 90.4        | 93.8        | 93.6                 | 94.4        | 7.9         | 16.9                 | 86.7        | 9.2         | 72.0        |
|               | RealNet <a href="#">Zhang et al. (2024c)</a>     | 91.0        | 94.0        | 92.6                 | 69.9        | 12.1        | 19.1                 | 50.5        | 10.6        | 65.2        |
|               | Emb.                                             |             |             |                      |             |             |                      |             |             |             |
|               | CFA <a href="#">Lee et al. (2022)</a>            | 88.7        | 94.9        | 88.9                 | 85.1        | 3.2         | 6.9                  | 52.6        | 3.6         | 63.9        |
|               | PatchCore <a href="#">Roth et al. (2022)</a>     | 95.6        | <u>97.2</u> | <u>95.3</u>          | <b>98.6</b> | <u>26.2</u> | <b>32.0</b>          | <b>95.4</b> | <b>19.0</b> | <b>79.5</b> |
|               | CFLOW-AD <a href="#">Gudovskiy et al. (2022)</a> | 74.4        | 77.6        | 85.2                 | 95.9        | 5.9         | 12.0                 | 91.1        | 6.4         | 65.1        |
|               | PyramidalFlow <a href="#">Lei et al. (2023)</a>  | 63.6        | 76.4        | 81.0                 | 94.0        | 5.7         | 12.5                 | 69.6        | 6.7         | 59.6        |
|               | Rec.                                             |             |             |                      |             |             |                      |             |             |             |
|               | RD <a href="#">Deng &amp; Li (2022)</a>          | 86.2        | 89.6        | 92.7                 | 96.0        | 13.1        | 23.1                 | 93.9        | 13.1        | 73.0        |
|               | DiAD <a href="#">He et al. (2024b)</a>           | 53.2        | 69.1        | 82.9                 | 90.0        | 2.8         | 7.0                  | 66.6        | 3.6         | 53.1        |
|               | VITAD <a href="#">Zhang et al. (2023a)</a>       | 86.5        | 86.0        | 92.6                 | <u>98.0</u> | 16.3        | 24.9                 | <u>95.0</u> | 14.2        | 73.5        |
|               | InvAD <a href="#">Zhang et al. (2024a)</a>       | 93.7        | <u>95.5</u> | <u>95.2</u>          | 95.5        | 15.2        | 22.8                 | 90.8        | 12.8        | 75.4        |
|               | InvAD-lite <a href="#">Zhang et al. (2024a)</a>  | 89.5        | <u>93.0</u> | 90.1                 | <u>97.9</u> | 14.9        | 25.0                 | 94.3        | 14.3        | 74.4        |
|               | MambaAD <a href="#">He et al. (2024a)</a>        | <b>95.7</b> | <b>97.5</b> | <u>95.3</u>          | <u>97.5</u> | <b>26.3</b> | <u>30.8</u>          | 92.8        | 18.2        | 79.0        |
|               | Hybrid                                           |             |             |                      |             |             |                      |             |             |             |
|               | UniAD <a href="#">You et al. (2022)</a>          | 91.4        | 95.0        | 92.7                 | <u>98.0</u> | <u>23.9</u> | <b>32.0</b>          | 90.7        | <b>19.0</b> | <u>77.1</u> |
|               | RD++ <a href="#">Tien et al. (2023)</a>          | 84.4        | 89.9        | 91.9                 | 96.6        | 17.2        | 24.4                 | <u>94.9</u> | 13.9        | 73.5        |
|               | DesTSeg <a href="#">Zhang et al. (2023c)</a>     | 95.0        | 92.5        | <b>96.2</b>          | 61.6        | 4.8         | 10.5                 | 30.1        | 5.5         | 60.7        |
| bracket_white | Aug.                                             |             |             |                      |             |             |                      |             |             |             |
|               | DRAEM <a href="#">Zavrtanik et al. (2021)</a>    | 34.0        | 44.3        | 66.7                 | 42.3        | 0.0         | 0.1                  | 9.0         | 0.0         | 30.6        |
|               | SimpleNet <a href="#">Liu et al. (2023)</a>      | 85.6        | 89.3        | 80.0                 | 97.7        | 2.1         | 6.5                  | 85.6        | 3.4         | 66.5        |
|               | RealNet <a href="#">Zhang et al. (2024c)</a>     | 77.3        | 86.2        | 80.8                 | 85.2        | <b>18.4</b> | <b>30.6</b>          | 47.4        | <b>18.0</b> | 63.4        |
|               | Emb.                                             |             |             |                      |             |             |                      |             |             |             |
|               | CFA <a href="#">Lee et al. (2022)</a>            | 80.2        | 86.0        | 77.8                 | 89.8        | 3.9         | 14.9                 | 47.3        | 8.0         | 60.2        |
|               | PatchCore <a href="#">Roth et al. (2022)</a>     | <u>93.3</u> | <u>94.8</u> | <u>88.9</u>          | 98.8        | 10.0        | 19.3                 | 93.9        | 10.7        | <u>73.9</u> |
|               | CFLOW-AD <a href="#">Gudovskiy et al. (2022)</a> | 62.9        | 64.1        | 69.8                 | 98.2        | 1.2         | 3.5                  | 93.0        | 1.8         | 57.3        |
|               | PyramidalFlow <a href="#">Lei et al. (2023)</a>  | 76.8        | 84.8        | 78.4                 | 98.9        | 5.6         | 14.5                 | 91.1        | 7.8         | 66.3        |
|               | Rec.                                             |             |             |                      |             |             |                      |             |             |             |
|               | RD <a href="#">Deng &amp; Li (2022)</a>          | 85.3        | 86.5        | 81.4                 | 99.0        | 2.3         | 6.4                  | <b>95.2</b> | 3.3         | 67.6        |
|               | DiAD <a href="#">He et al. (2024b)</a>           | 84.0        | 90.7        | <u>88.9</u>          | 96.5        | 1.0         | 3.6                  | 82.5        | 1.8         | 63.9        |
|               | VITAD <a href="#">Zhang et al. (2023a)</a>       | 78.9        | 84.0        | 78.7                 | 95.7        | 0.9         | 2.9                  | 86.7        | 1.5         | 63.5        |
|               | InvAD <a href="#">Zhang et al. (2024a)</a>       | 92.1        | <u>94.7</u> | <u>90.0</u>          | 98.9        | 9.8         | 21.9                 | 94.1        | <u>12.3</u> | <u>74.2</u> |
|               | InvAD-lite <a href="#">Zhang et al. (2024a)</a>  | 90.2        | 92.2        | 84.7                 | <u>99.2</u> | 5.2         | 10.6                 | 94.8        | 5.6         | 70.7        |
|               | MambaAD <a href="#">He et al. (2024a)</a>        | <b>97.1</b> | <b>97.5</b> | <b>90.9</b>          | <b>99.3</b> | 12.2        | 20.4                 | <u>95.0</u> | 11.3        | <b>75.9</b> |
|               | Hybrid                                           |             |             |                      |             |             |                      |             |             |             |
|               | UniAD <a href="#">You et al. (2022)</a>          | 63.6        | 67.1        | 69.6                 | 95.0        | 0.3         | 0.8                  | 79.6        | 0.4         | 55.3        |
|               | RD++ <a href="#">Tien et al. (2023)</a>          | 81.4        | 86.0        | 76.4                 | 98.7        | 2.9         | 10.0                 | 93.4        | 5.2         | 66.3        |
|               | DesTSeg <a href="#">Zhang et al. (2023c)</a>     | 91.1        | 89.8        | 88.5                 | 90.4        | 1.0         | 2.7                  | 51.2        | 1.4         | 63.1        |
| connector     | Aug.                                             |             |             |                      |             |             |                      |             |             |             |
|               | DRAEM <a href="#">Zavrtanik et al. (2021)</a>    | 21.7        | 22.2        | 48.3                 | 35.1        | 0.6         | 2.1                  | 16.8        | 1.1         | 22.2        |
|               | SimpleNet <a href="#">Liu et al. (2023)</a>      | 96.2        | 92.0        | 90.3                 | 98.3        | 46.4        | 47.0                 | 94.5        | 30.7        | 82.2        |
|               | RealNet <a href="#">Zhang et al. (2024c)</a>     | 99.0        | 97.9        | 96.6                 | 85.8        | 38.9        | 44.1                 | 75.8        | 28.3        | 79.5        |
|               | Emb.                                             |             |             |                      |             |             |                      |             |             |             |
|               | CFA <a href="#">Lee et al. (2022)</a>            | 96.9        | 89.0        | 93.3                 | 83.5        | 11.2        | 16.3                 | 59.2        | 8.9         | 67.8        |
|               | PatchCore <a href="#">Roth et al. (2022)</a>     | <b>100.</b> | <b>100.</b> | <b>100.</b>          | <b>99.5</b> | <b>71.2</b> | <b>63.3</b>          | <b>98.4</b> | <b>46.3</b> | <b>91.5</b> |
|               | CFLOW-AD <a href="#">Gudovskiy et al. (2022)</a> | 91.2        | 85.3        | 78.6                 | 96.7        | 27.9        | 29.3                 | 89.4        | 17.2        | 72.9        |
|               | PyramidalFlow <a href="#">Lei et al. (2023)</a>  | 69.0        | 42.7        | 63.4                 | 90.7        | 3.7         | 7.2                  | 70.0        | 3.7         | 50.6        |
|               | Rec.                                             |             |             |                      |             |             |                      |             |             |             |
|               | RD <a href="#">Deng &amp; Li (2022)</a>          | <b>100.</b> | <b>100.</b> | <b>100.</b>          | <u>99.2</u> | 60.6        | 55.5                 | <u>97.5</u> | 38.4        | <u>89.1</u> |
|               | DiAD <a href="#">He et al. (2024b)</a>           | 57.1        | 48.0        | 56.3                 | 90.1        | 2.9         | 6.5                  | 68.4        | 3.4         | 47.1        |
|               | VITAD <a href="#">Zhang et al. (2023a)</a>       | 96.2        | 91.9        | 86.7                 | <u>99.3</u> | 44.3        | 47.6                 | <u>97.7</u> | 31.2        | 81.9        |
|               | InvAD <a href="#">Zhang et al. (2024a)</a>       | 96.7        | 83.4        | 96.6                 | 98.9        | 57.9        | <u>58.1</u>          | 96.4        | 41.0        | 85.0        |
|               | InvAD-lite <a href="#">Zhang et al. (2024a)</a>  | 97.1        | 90.8        | 93.3                 | <u>99.2</u> | <u>62.2</u> | <u>58.1</u>          | 97.3        | 41.0        | 86.5        |
|               | MambaAD <a href="#">He et al. (2024a)</a>        | 99.5        | 99.1        | 96.3                 | <u>99.2</u> | <u>54.5</u> | <u>56.5</u>          | 97.3        | 39.3        | 87.6        |
|               | Hybrid                                           |             |             |                      |             |             |                      |             |             |             |
|               | UniAD <a href="#">You et al. (2022)</a>          | 69.8        | 49.9        | 58.5                 | <u>95.2</u> | 7.6         | 14.9                 | 83.9        | 8.1         | 54.9        |
|               | RD++ <a href="#">Tien et al. (2023)</a>          | <b>100.</b> | <b>100.</b> | <b>100.</b>          | <u>99.2</u> | <u>67.0</u> | <u>61.8</u>          | 97.4        | <u>44.8</u> | <u>90.7</u> |
|               | DesTSeg <a href="#">Zhang et al. (2023c)</a>     | 92.1        | 81.4        | 82.4                 | 76.6        | 33.8        | 37.6                 | 61.1        | 23.1        | 68.8        |



Table A36: Benchmarked results on MPDD dataset [Jezek et al. \(2021\)](#) by the suggested metrics in [Sec. 3.3](#).

|             | Method | Image-level                                      |             |             | Pixel-level |             |             | mAU-PRO     | mIoU-max    | mAD         |             |
|-------------|--------|--------------------------------------------------|-------------|-------------|-------------|-------------|-------------|-------------|-------------|-------------|-------------|
|             |        | mAU-ROC                                          | mAP         | mF1-max     | mAU-ROC     | mAP         | mF1-max     |             |             |             |             |
| metal-plate | Aug.   | DRAEM <a href="#">Zavrtanik et al. (2021)</a>    | 41.9        | 76.3        | 84.5        | 36.3        | 10.8        | 21.2        | 13.3        | 11.9        | 44.0        |
|             |        | SimpleNet <a href="#">Liu et al. (2023)</a>      | <b>100.</b> | <b>100.</b> | <b>100.</b> | 98.4        | 89.8        | 81.7        | 89.2        | 69.1        | 94.9        |
|             |        | RealNet <a href="#">Zhang et al. (2024c)</a>     | 99.9        | <b>100.</b> | 99.3        | 97.7        | 90.5        | 84.1        | 93.6        | 72.6        | 95.6        |
|             | Emb.   | CFA <a href="#">Lee et al. (2022)</a>            | 99.7        | 99.9        | 98.6        | 97.6        | 89.8        | 81.8        | 83.1        | 69.2        | 93.7        |
|             |        | PatchCore <a href="#">Roth et al. (2022)</a>     | <b>100.</b> | <b>100.</b> | <b>100.</b> | 99.0        | 93.5        | 86.1        | 94.1        | 75.7        | 96.6        |
|             |        | CFLOW-AD <a href="#">Gudovskiy et al. (2022)</a> | 99.9        | <b>100.</b> | 99.3        | 98.5        | 89.0        | 83.3        | 92.4        | 71.4        | 95.3        |
|             |        | PyramidalFlow <a href="#">Lei et al. (2023)</a>  | 96.7        | 98.7        | 95.2        | 88.7        | 61.3        | 21.1        | 60.8        | 11.8        | 77.4        |
|             | Rec.   | RD <a href="#">Deng &amp; Li (2022)</a>          | <b>100.</b> | <b>100.</b> | <b>100.</b> | 99.1        | 92.9        | 87.7        | <b>96.7</b> | 78.1        | 97.0        |
|             |        | DiAD <a href="#">He et al. (2024b)</a>           | 89.3        | 96.4        | 89.9        | 88.4        | 54.6        | 52.8        | 55.5        | 35.9        | 75.3        |
|             |        | ViTAD <a href="#">Zhang et al. (2023a)</a>       | <b>100.</b> | <b>100.</b> | <b>100.</b> | <b>99.3</b> | <b>95.5</b> | <b>88.0</b> | 94.9        | <b>78.6</b> | <b>97.2</b> |
|             |        | InvAD <a href="#">Zhang et al. (2024a)</a>       | <b>100.</b> | <b>100.</b> | <b>100.</b> | 99.0        | 92.2        | 87.2        | 96.0        | 77.2        | 96.8        |
|             |        | InvAD-lite <a href="#">Zhang et al. (2024a)</a>  | 99.8        | 99.9        | 98.6        | 98.4        | 86.4        | 82.9        | 94.2        | 70.8        | 95.0        |
|             |        | MambaAD <a href="#">He et al. (2024a)</a>        | 99.8        | 99.9        | 98.6        | 98.2        | 83.8        | 82.2        | 94.3        | 69.8        | 94.5        |
|             |        | UniAD <a href="#">You et al. (2022)</a>          | 47.5        | 74.3        | 85.0        | 90.7        | 41.2        | 56.9        | 73.6        | 39.8        | 67.3        |
|             | Hybrid | RD++ <a href="#">Tien et al. (2023)</a>          | 99.8        | 99.9        | 98.6        | 99.1        | 92.1        | 87.2        | 95.7        | 77.3        | 96.5        |
|             |        | DesTSeg <a href="#">Zhang et al. (2023c)</a>     | <b>100.</b> | <b>100.</b> | <b>100.</b> | 95.6        | 91.4        | 87.0        | 88.8        | 77.0        | 95.3        |
| tubes       | Aug.   | DRAEM <a href="#">Zavrtanik et al. (2021)</a>    | 34.8        | 64.0        | 81.2        | 47.0        | 1.1         | 2.0         | 23.2        | 1.0         | 39.2        |
|             |        | SimpleNet <a href="#">Liu et al. (2023)</a>      | 84.0        | 93.9        | 85.0        | 97.6        | 42.8        | 45.8        | 91.7        | 29.7        | 78.6        |
|             |        | RealNet <a href="#">Zhang et al. (2024c)</a>     | 80.1        | 90.1        | 85.2        | 95.3        | 54.3        | 53.0        | 90.4        | 36.1        | 79.2        |
|             | Emb.   | CFA <a href="#">Lee et al. (2022)</a>            | 65.4        | 83.7        | 81.2        | 78.8        | 9.2         | 17.4        | 47.1        | 9.5         | 57.4        |
|             |        | PatchCore <a href="#">Roth et al. (2022)</a>     | 90.4        | 96.6        | 92.4        | 98.8        | 64.5        | 63.8        | 95.5        | 46.9        | 86.9        |
|             |        | CFLOW-AD <a href="#">Gudovskiy et al. (2022)</a> | 65.0        | 83.3        | 81.7        | 96.2        | 32.0        | 35.6        | 86.0        | 21.7        | 69.6        |
|             |        | PyramidalFlow <a href="#">Lei et al. (2023)</a>  | 69.8        | 86.6        | 81.2        | 97.1        | 48.2        | 46.4        | 90.3        | 30.2        | 74.8        |
|             | Rec.   | RD <a href="#">Deng &amp; Li (2022)</a>          | 91.9        | 97.1        | 93.3        | 99.0        | 67.1        | 65.6        | 96.0        | 48.8        | 88.0        |
|             |        | DiAD <a href="#">He et al. (2024b)</a>           | 55.4        | 81.1        | 83.6        | 87.7        | 3.9         | 7.6         | 58.2        | 4.0         | 53.9        |
|             |        | ViTAD <a href="#">Zhang et al. (2023a)</a>       | 86.6        | 94.8        | 86.6        | 98.5        | 51.5        | 53.3        | 93.5        | 36.4        | 81.8        |
|             |        | InvAD <a href="#">Zhang et al. (2024a)</a>       | <b>96.4</b> | <b>98.6</b> | <b>95.5</b> | <b>99.3</b> | <b>72.3</b> | <b>69.0</b> | <b>97.4</b> | <b>52.7</b> | <b>90.7</b> |
|             |        | InvAD-lite <a href="#">Zhang et al. (2024a)</a>  | 93.0        | 96.9        | 91.3        | 98.3        | 61.4        | 62.0        | 94.0        | 44.9        | 86.3        |
|             |        | MambaAD <a href="#">He et al. (2024a)</a>        | 58.4        | 77.0        | 81.7        | 96.1        | 19.6        | 27.8        | 85.8        | 16.1        | 64.8        |
|             |        | UniAD <a href="#">You et al. (2022)</a>          | 72.5        | 84.8        | 83.1        | 91.4        | 8.6         | 13.5        | 71.1        | 7.2         | 63.1        |
|             | Hybrid | RD++ <a href="#">Tien et al. (2023)</a>          | 93.0        | 97.5        | 93.0        | <b>99.3</b> | <b>74.6</b> | <b>70.8</b> | 97.2        | <b>54.8</b> | 90.0        |
|             |        | DesTSeg <a href="#">Zhang et al. (2023c)</a>     | 86.4        | 93.8        | 88.4        | 95.6        | 59.2        | 56.1        | 89.4        | 39.0        | 82.3        |
| Avg         | Aug.   | DRAEM <a href="#">Zavrtanik et al. (2021)</a>    | 35.6        | 53.3        | 72.5        | 42.1        | 2.2         | 4.6         | 19.0        | 2.5         | 35.4        |
|             |        | SimpleNet <a href="#">Liu et al. (2023)</a>      | 88.4        | 92.0        | 87.9        | 96.5        | 32.0        | 34.6        | 89.0        | 24.5        | 76.2        |
|             |        | RealNet <a href="#">Zhang et al. (2024c)</a>     | 85.1        | 90.2        | 88.3        | 83.3        | 36.1        | 39.6        | 68.1        | 28.2        | 72.3        |
|             | Emb.   | CFA <a href="#">Lee et al. (2022)</a>            | 81.6        | 87.7        | 85.7        | 84.9        | 19.6        | 22.9        | 53.5        | 16.6        | 65.1        |
|             |        | PatchCore <a href="#">Roth et al. (2022)</a>     | <b>94.6</b> | <b>96.9</b> | <b>93.4</b> | <b>98.9</b> | <b>46.1</b> | <b>47.6</b> | <b>95.7</b> | <b>35.0</b> | <b>83.5</b> |
|             |        | CFLOW-AD <a href="#">Gudovskiy et al. (2022)</a> | 75.7        | 80.1        | 81.7        | 96.8        | 26.3        | 28.0        | 89.5        | 20.1        | 69.7        |
|             |        | PyramidalFlow <a href="#">Lei et al. (2023)</a>  | 73.6        | 77.0        | 79.4        | 94.1        | 21.1        | 17.8        | 77.2        | 10.4        | 64.6        |
|             | Rec.   | RD <a href="#">Deng &amp; Li (2022)</a>          | 91.3        | 93.6        | 91.8        | 98.3        | 40.4        | 41.8        | 95.5        | 31.4        | 80.6        |
|             |        | DiAD <a href="#">He et al. (2024b)</a>           | 68.3        | 77.9        | 80.1        | 90.4        | 10.9        | 13.1        | 66.1        | 8.2         | 58.1        |
|             |        | ViTAD <a href="#">Zhang et al. (2023a)</a>       | 87.8        | 90.5        | 88.0        | 97.7        | 35.2        | 37.4        | 92.8        | 27.7        | 77.3        |
|             |        | InvAD <a href="#">Zhang et al. (2024a)</a>       | 93.7        | 93.9        | 93.0        | 98.2        | 42.4        | 45.7        | 94.8        | 34.0        | 81.9        |
|             |        | InvAD-lite <a href="#">Zhang et al. (2024a)</a>  | 90.9        | 92.9        | 89.5        | 98.0        | 39.7        | 42.6        | 94.0        | 30.9        | 79.8        |
|             |        | MambaAD <a href="#">He et al. (2024a)</a>        | 88.7        | 93.2        | 90.8        | 97.5        | 33.6        | 38.1        | 92.3        | 26.8        | 78.1        |
|             |        | UniAD <a href="#">You et al. (2022)</a>          | 70.5        | 76.0        | 78.0        | 93.9        | 13.7        | 19.9        | 79.7        | 12.5        | 63.3        |
|             | Hybrid | RD++ <a href="#">Tien et al. (2023)</a>          | 90.2        | 93.3        | 90.5        | 98.5        | 43.0        | 44.1        | 95.5        | 33.6        | 80.8        |
|             |        | DesTSeg <a href="#">Zhang et al. (2023c)</a>     | 91.3        | 90.8        | 90.2        | 82.0        | 32.6        | 34.6        | 63.3        | 25.6        | 71.9        |

# I DETAILED QUANTITATIVE RESULTS ON MAD\_REAL DATASET UNDER 100 EPOCHS

Table A37: Benchmarked results on MAD\_Real dataset [Zhou et al. \(2024\)](#) by the suggested metrics in [Sec. 3.3](#).

|          | Method | Image-level                                      |             |                      | Pixel-level |             |                      | mAU-PRO     | mIoU-max    | mAD         |
|----------|--------|--------------------------------------------------|-------------|----------------------|-------------|-------------|----------------------|-------------|-------------|-------------|
|          |        | mAU-ROC                                          | mAP         | mF <sub>1</sub> -max | mAU-ROC     | mAP         | mF <sub>1</sub> -max |             |             |             |
| Bear     | Aug.   | DRAEM <a href="#">Zavrtanik et al. (2021)</a>    | 43.3        | 83.5                 | 92.3        | 54.0        | 0.2                  | 1.1         | 34.1        | 47.7        |
|          |        | SimpleNet <a href="#">Liu et al. (2023)</a>      | 24.2        | 72.7                 | 90.6        | 94.9        | 3.0                  | 10.4        | 87.2        | 55.7        |
|          |        | CFA <a href="#">Lee et al. (2022)</a>            | 15.0        | 69.1                 | 90.6        | 99.1        | 4.2                  | 10.3        | 96.5        | 55.4        |
|          | Emb.   | PatchCore <a href="#">Roth et al. (2022)</a>     | 84.2        | 96.8                 | 91.7        | 99.6        | 17.6                 | 29.5        | 98.6        | 76.1        |
|          |        | CFLOW-AD <a href="#">Gudovskiy et al. (2022)</a> | 76.7        | 94.4                 | 92.3        | 99.4        | 6.0                  | 12.3        | 97.6        | 70.8        |
|          |        | PyramidalFlow <a href="#">Lei et al. (2023)</a>  | 46.7        | 78.6                 | 90.6        | 98.2        | 2.3                  | 4.9         | 93.9        | 60.9        |
|          | Rec.   | RD <a href="#">Deng &amp; Li (2022)</a>          | 76.7        | 94.6                 | 94.1        | 97.7        | 5.2                  | 7.9         | 93.2        | 4.1         |
|          |        | DiAD <a href="#">He et al. (2024b)</a>           | 52.5        | 88.7                 | 90.6        | 97.4        | 5.1                  | 13.5        | 90.3        | 7.2         |
|          |        | ViTAD <a href="#">Zhang et al. (2023a)</a>       | 35.0        | 76.8                 | 90.6        | 97.3        | 1.9                  | 6.9         | 91.0        | 3.6         |
|          |        | InvAD <a href="#">Zhang et al. (2024a)</a>       | <b>95.8</b> | <b>99.1</b>          | <b>98.0</b> | <b>99.7</b> | <b>39.9</b>          | <b>44.1</b> | <b>98.9</b> | <b>28.3</b> |
|          |        | InvAD-lite <a href="#">Zhang et al. (2024a)</a>  | 82.5        | 96.1                 | 93.9        | 98.4        | 5.0                  | 11.6        | 95.1        | 6.2         |
|          |        | MambaAD <a href="#">He et al. (2024a)</a>        | 32.5        | 75.1                 | 90.6        | 93.3        | 1.0                  | 4.0         | 80.3        | 2.0         |
| Bird     | Hybrid | UniAD <a href="#">You et al. (2022)</a>          | 83.3        | 96.5                 | 90.6        | 99.0        | 4.0                  | 9.6         | 96.3        | 5.0         |
|          |        | RD++ <a href="#">Tien et al. (2023)</a>          | 77.5        | 94.4                 | 93.9        | 99.0        | 8.5                  | 15.3        | 96.8        | 8.3         |
|          |        | DesTSeg <a href="#">Zhang et al. (2023c)</a>     | 26.7        | 76.9                 | 90.6        | 80.3        | 0.4                  | 1.3         | 56.6        | 0.6         |
|          | Aug.   | DRAEM <a href="#">Zavrtanik et al. (2021)</a>    | 60.9        | 89.6                 | 89.8        | 57.7        | 0.7                  | 1.0         | 22.1        | 0.5         |
|          |        | SimpleNet <a href="#">Liu et al. (2023)</a>      | 58.2        | 87.8                 | 91.7        | 82.7        | 2.4                  | 6.2         | 53.7        | 3.2         |
|          |        | CFA <a href="#">Lee et al. (2022)</a>            | 55.5        | 83.1                 | 89.8        | 86.6        | 4.6                  | 10.9        | 56.9        | 5.7         |
|          | Emb.   | PatchCore <a href="#">Roth et al. (2022)</a>     | 71.8        | 92.6                 | <b>93.6</b> | <b>96.4</b> | <b>32.2</b>          | <b>39.7</b> | <b>84.2</b> | <b>24.8</b> |
|          |        | CFLOW-AD <a href="#">Gudovskiy et al. (2022)</a> | 35.5        | 74.4                 | 89.8        | 89.3        | 2.7                  | 6.3         | 64.4        | 3.3         |
|          |        | PyramidalFlow <a href="#">Lei et al. (2023)</a>  | 17.3        | 69.0                 | 89.8        | 91.2        | 2.9                  | 6.4         | 66.7        | 3.3         |
|          | Rec.   | RD <a href="#">Deng &amp; Li (2022)</a>          | 51.8        | 85.9                 | 89.8        | 87.1        | 7.7                  | 16.6        | 57.2        | 9.1         |
|          |        | DiAD <a href="#">He et al. (2024b)</a>           | 9.1         | 70.5                 | 89.8        | 93.1        | 4.3                  | 10.4        | 71.1        | 5.5         |
|          |        | ViTAD <a href="#">Zhang et al. (2023a)</a>       | 67.3        | 89.7                 | <b>93.6</b> | 89.6        | 9.8                  | 17.6        | 62.6        | 9.7         |
|          |        | InvAD <a href="#">Zhang et al. (2024a)</a>       | 84.5        | 96.4                 | 93.3        | 89.0        | 10.1                 | 20.0        | 66.1        | 11.1        |
|          |        | InvAD-lite <a href="#">Zhang et al. (2024a)</a>  | 53.6        | 78.6                 | 91.7        | 92.8        | 6.2                  | 13.4        | 73.8        | 7.2         |
|          |        | MambaAD <a href="#">He et al. (2024a)</a>        | <b>86.4</b> | <b>97.1</b>          | 91.3        | 95.1        | 17.8                 | 28.5        | 77.9        | 16.6        |
| Elephant | Hybrid | UniAD <a href="#">You et al. (2022)</a>          | 38.2        | 74.3                 | 89.8        | 87.1        | 2.4                  | 6.5         | 63.3        | 3.4         |
|          |        | RD++ <a href="#">Tien et al. (2023)</a>          | 45.5        | 82.2                 | 89.8        | 89.6        | 6.8                  | 15.4        | 63.2        | 8.4         |
|          |        | DesTSeg <a href="#">Zhang et al. (2023c)</a>     | 60.0        | 82.7                 | <b>93.6</b> | 66.2        | 5.4                  | 13.8        | 35.4        | 7.4         |
|          | Aug.   | DRAEM <a href="#">Zavrtanik et al. (2021)</a>    | <b>77.8</b> | <b>93.9</b>          | <b>90.0</b> | 50.1        | 0.4                  | 1.2         | 18.7        | 0.6         |
|          |        | SimpleNet <a href="#">Liu et al. (2023)</a>      | 20.0        | 68.9                 | 87.8        | 76.4        | 6.1                  | 14.5        | 42.9        | 7.8         |
|          |        | CFA <a href="#">Lee et al. (2022)</a>            | 35.6        | 71.5                 | 87.8        | 86.8        | 5.7                  | 10.6        | 58.4        | 5.6         |
|          | Emb.   | PatchCore <a href="#">Roth et al. (2022)</a>     | 27.8        | 69.5                 | 87.8        | 93.7        | <b>11.1</b>          | <b>18.3</b> | 78.8        | <b>10.1</b> |
|          |        | CFLOW-AD <a href="#">Gudovskiy et al. (2022)</a> | 23.3        | 71.6                 | 87.8        | 90.6        | 8.6                  | 11.5        | 66.4        | 6.1         |
|          |        | PyramidalFlow <a href="#">Lei et al. (2023)</a>  | 51.1        | 84.2                 | 87.8        | 93.0        | 2.8                  | 6.0         | 76.5        | 3.1         |
|          | Rec.   | RD <a href="#">Deng &amp; Li (2022)</a>          | 43.3        | 82.7                 | 87.8        | 88.2        | 2.1                  | 5.4         | 65.6        | 2.8         |
|          |        | DiAD <a href="#">He et al. (2024b)</a>           | 36.7        | 76.9                 | <b>90.0</b> | 91.8        | 2.0                  | 4.3         | 74.1        | 2.2         |
|          |        | ViTAD <a href="#">Zhang et al. (2023a)</a>       | 46.7        | 77.4                 | 87.8        | <b>96.1</b> | 9.1                  | 18.0        | <b>85.6</b> | <b>9.9</b>  |
|          |        | InvAD <a href="#">Zhang et al. (2024a)</a>       | 32.2        | 72.6                 | 87.8        | 91.3        | 6.5                  | 13.2        | 71.4        | 7.0         |
|          |        | InvAD-lite <a href="#">Zhang et al. (2024a)</a>  | 36.7        | 72.7                 | 87.8        | 91.5        | 4.7                  | 10.1        | 75.2        | 5.3         |
|          |        | MambaAD <a href="#">He et al. (2024a)</a>        | 47.8        | 79.2                 | 87.8        | 90.7        | 4.7                  | 9.2         | 72.5        | 4.8         |
| Parrot   | Hybrid | UniAD <a href="#">You et al. (2022)</a>          | 11.1        | 63.1                 | 87.8        | 79.1        | 1.3                  | 4.0         | 38.7        | 2.0         |
|          |        | RD++ <a href="#">Tien et al. (2023)</a>          | 41.1        | 80.3                 | 87.8        | 85.2        | 1.7                  | 4.1         | 59.6        | 2.1         |
|          |        | DesTSeg <a href="#">Zhang et al. (2023c)</a>     | 58.9        | 83.6                 | <b>90.0</b> | 66.6        | 1.2                  | 5.0         | 32.6        | 2.6         |
|          | Aug.   | DRAEM <a href="#">Zavrtanik et al. (2021)</a>    | <b>64.3</b> | 87.0                 | <b>92.0</b> | 49.2        | 0.6                  | 1.3         | 14.6        | 0.6         |
|          |        | SimpleNet <a href="#">Liu et al. (2023)</a>      | 16.5        | 71.6                 | 90.2        | 61.9        | 0.9                  | 1.8         | 32.7        | 0.9         |
|          |        | CFA <a href="#">Lee et al. (2022)</a>            | 4.3         | 65.9                 | 90.2        | 42.3        | 0.5                  | 1.3         | 17.0        | 0.7         |
|          | Emb.   | PatchCore <a href="#">Roth et al. (2022)</a>     | 5.2         | 66.2                 | 90.2        | <b>81.7</b> | <b>2.1</b>           | <b>5.1</b>  | <b>64.0</b> | <b>2.6</b>  |
|          |        | CFLOW-AD <a href="#">Gudovskiy et al. (2022)</a> | 16.5        | 68.0                 | 90.2        | 66.7        | 1.0                  | 2.5         | 41.9        | 1.3         |
|          |        | PyramidalFlow <a href="#">Lei et al. (2023)</a>  | 25.2        | 77.3                 | 90.2        | 64.2        | 0.9                  | 2.2         | 31.8        | 1.1         |
|          | Rec.   | RD <a href="#">Deng &amp; Li (2022)</a>          | 1.7         | 64.6                 | 90.2        | 64.3        | 0.9                  | 2.0         | 34.3        | 1.0         |
|          |        | DiAD <a href="#">He et al. (2024b)</a>           | 60.9        | <b>91.6</b>          | 90.2        | 63.6        | 0.9                  | 2.0         | 41.7        | 1.0         |
|          |        | ViTAD <a href="#">Zhang et al. (2023a)</a>       | 16.5        | 69.8                 | 90.2        | 69.8        | 1.1                  | 2.6         | 40.8        | 1.3         |
|          |        | InvAD <a href="#">Zhang et al. (2024a)</a>       | 11.3        | 68.6                 | 90.2        | 52.1        | 0.7                  | 1.4         | 32.7        | 0.7         |
|          |        | InvAD-lite <a href="#">Zhang et al. (2024a)</a>  | 4.3         | 65.4                 | 90.2        | 60.4        | 0.8                  | 1.8         | 38.4        | 0.9         |
|          |        | MambaAD <a href="#">He et al. (2024a)</a>        | 6.1         | 66.6                 | 90.2        | 72.4        | 1.1                  | 2.6         | 45.6        | 1.3         |
| Hybrid   | Hybrid | UniAD <a href="#">You et al. (2022)</a>          | 33.9        | 76.4                 | 90.2        | 61.2        | 0.8                  | 1.8         | 37.7        | 0.9         |
|          |        | RD++ <a href="#">Tien et al. (2023)</a>          | 7.0         | 66.2                 | 90.2        | 63.1        | 0.9                  | 2.0         | 33.5        | 1.0         |
|          |        | DesTSeg <a href="#">Zhang et al. (2023c)</a>     | 3.5         | 65.1                 | 90.2        | 48.7        | 0.6                  | 1.3         | 18.5        | 0.6         |

Table A38: Benchmarked results on MAD\_Real dataset Zhou et al. (2024) by the suggested metrics in Sec. 3.3.

| Method   |        | Image-level                                      |      |                      | Pixel-level |      |                      | mAU-PRO | mIoU-max | mAD  |      |
|----------|--------|--------------------------------------------------|------|----------------------|-------------|------|----------------------|---------|----------|------|------|
|          |        | mAU-ROC                                          | mAP  | mF <sub>1</sub> -max | mAU-ROC     | mAP  | mF <sub>1</sub> -max |         |          |      |      |
| Pig      | Aug.   | DRAEM <a href="#">Zavrtanik et al. (2021)</a>    | 67.1 | 89.5                 | 87.2        | 52.2 | 0.5                  | 1.2     | 23.8     | 0.6  | 50.3 |
|          |        | SimpleNet <a href="#">Liu et al. (2023)</a>      | 49.4 | 76.5                 | 87.2        | 93.9 | 10.1                 | 21.9    | 72.9     | 12.3 | 60.4 |
|          | Emb.   | CFA <a href="#">Lee et al. (2022)</a>            | 55.3 | 77.6                 | 89.5        | 93.0 | 5.0                  | 11.2    | 73.0     | 5.9  | 59.8 |
|          |        | PatchCore <a href="#">Roth et al. (2022)</a>     | 56.5 | 78.8                 | 89.5        | 98.5 | 19.9                 | 28.7    | 89.7     | 16.7 | 67.1 |
|          |        | CFLOW-AD <a href="#">Gudovskiy et al. (2022)</a> | 57.6 | 78.8                 | 87.2        | 96.5 | 5.8                  | 12.0    | 85.2     | 6.4  | 62.2 |
|          |        | PyramidalFlow <a href="#">Lei et al. (2023)</a>  | 57.6 | 84.2                 | 87.2        | 95.7 | 5.2                  | 10.0    | 81.9     | 5.3  | 62.3 |
|          | Rec.   | RD <a href="#">Deng &amp; Li (2022)</a>          | 60.0 | 80.2                 | 89.5        | 98.4 | 21.1                 | 31.0    | 92.5     | 18.3 | 68.7 |
|          |        | DiAD <a href="#">He et al. (2024b)</a>           | 56.5 | 87.9                 | 87.2        | 92.9 | 2.7                  | 5.9     | 71.7     | 3.0  | 57.8 |
|          |        | ViTAD <a href="#">Zhang et al. (2023a)</a>       | 37.6 | 71.6                 | 87.2        | 97.7 | 8.6                  | 17.2    | 89.8     | 9.4  | 59.4 |
|          |        | InvAD <a href="#">Zhang et al. (2024a)</a>       | 58.8 | 77.1                 | 89.5        | 98.1 | 11.7                 | 22.1    | 91.1     | 12.4 | 65.4 |
|          |        | InvAD-lite <a href="#">Zhang et al. (2024a)</a>  | 47.1 | 73.7                 | 89.5        | 98.4 | 13.0                 | 24.1    | 92.9     | 13.7 | 63.6 |
|          |        | MambaAD <a href="#">He et al. (2024a)</a>        | 61.2 | 80.3                 | 87.2        | 97.7 | 12.2                 | 22.8    | 87.1     | 12.8 | 65.6 |
|          | Hybrid | UniAD <a href="#">You et al. (2022)</a>          | 50.6 | 83.9                 | 87.2        | 88.8 | 1.6                  | 4.2     | 62.2     | 2.1  | 56.5 |
|          |        | RD++ <a href="#">Tien et al. (2023)</a>          | 61.2 | 80.3                 | 91.4        | 98.0 | 14.3                 | 23.0    | 91.0     | 13.0 | 67.1 |
|          |        | DesTSeg <a href="#">Zhang et al. (2023c)</a>     | 48.2 | 74.8                 | 89.5        | 71.1 | 2.3                  | 6.0     | 43.6     | 3.1  | 50.8 |
| Puppy    | Aug.   | DRAEM <a href="#">Zavrtanik et al. (2021)</a>    | 53.0 | 82.9                 | 88.9        | 46.3 | 0.4                  | 1.9     | 23.9     | 1.0  | 46.5 |
|          |        | SimpleNet <a href="#">Liu et al. (2023)</a>      | 68.0 | 90.6                 | 90.9        | 94.5 | 4.1                  | 10.3    | 72.4     | 5.4  | 64.2 |
|          | Emb.   | CFA <a href="#">Lee et al. (2022)</a>            | 83.0 | 95.3                 | 93.0        | 98.6 | 7.1                  | 14.5    | 92.3     | 7.8  | 71.8 |
|          |        | PatchCore <a href="#">Roth et al. (2022)</a>     | 100. | 100.                 | 100.        | 99.2 | 13.4                 | 25.1    | 92.1     | 14.3 | 78.7 |
|          |        | CFLOW-AD <a href="#">Gudovskiy et al. (2022)</a> | 79.0 | 94.3                 | 93.0        | 99.2 | 27.9                 | 33.3    | 94.2     | 20.0 | 76.2 |
|          |        | PyramidalFlow <a href="#">Lei et al. (2023)</a>  | 56.0 | 85.5                 | 88.9        | 95.1 | 7.6                  | 16.9    | 75.0     | 9.3  | 62.7 |
|          | Rec.   | RD <a href="#">Deng &amp; Li (2022)</a>          | 78.0 | 94.4                 | 90.0        | 95.8 | 4.4                  | 9.1     | 87.2     | 4.7  | 68.3 |
|          |        | DiAD <a href="#">He et al. (2024b)</a>           | 76.0 | 94.7                 | 88.9        | 94.6 | 1.8                  | 5.0     | 78.3     | 2.6  | 62.8 |
|          |        | ViTAD <a href="#">Zhang et al. (2023a)</a>       | 58.0 | 87.6                 | 88.9        | 92.5 | 1.2                  | 2.9     | 75.8     | 1.5  | 60.6 |
|          |        | InvAD <a href="#">Zhang et al. (2024a)</a>       | 100. | 100.                 | 100.        | 99.8 | 45.6                 | 44.9    | 98.1     | 28.9 | 86.0 |
|          |        | InvAD-lite <a href="#">Zhang et al. (2024a)</a>  | 96.0 | 99.0                 | 97.6        | 96.9 | 5.9                  | 11.9    | 90.3     | 6.3  | 74.4 |
|          |        | MambaAD <a href="#">He et al. (2024a)</a>        | 82.0 | 94.7                 | 92.3        | 88.1 | 1.8                  | 5.3     | 71.1     | 2.7  | 65.6 |
|          | Hybrid | UniAD <a href="#">You et al. (2022)</a>          | 74.0 | 92.9                 | 90.9        | 98.6 | 14.1                 | 21.9    | 91.0     | 12.3 | 71.2 |
|          |        | RD++ <a href="#">Tien et al. (2023)</a>          | 66.0 | 87.6                 | 93.0        | 98.1 | 4.8                  | 11.2    | 92.4     | 5.9  | 66.9 |
|          |        | DesTSeg <a href="#">Zhang et al. (2023c)</a>     | 49.0 | 81.8                 | 88.9        | 97.6 | 11.2                 | 11.6    | 87.7     | 6.2  | 62.6 |
| Scorpion | Aug.   | DRAEM <a href="#">Zavrtanik et al. (2021)</a>    | 33.0 | 80.7                 | 90.2        | 46.8 | 1.4                  | 2.9     | 14.6     | 1.5  | 42.2 |
|          |        | SimpleNet <a href="#">Liu et al. (2023)</a>      | 43.5 | 84.0                 | 90.2        | 70.9 | 6.0                  | 13.0    | 33.4     | 6.9  | 51.7 |
|          | Emb.   | CFA <a href="#">Lee et al. (2022)</a>            | 30.4 | 81.6                 | 90.2        | 60.9 | 5.6                  | 13.4    | 26.4     | 7.2  | 47.0 |
|          |        | PatchCore <a href="#">Roth et al. (2022)</a>     | 13.0 | 70.7                 | 90.2        | 88.2 | 8.8                  | 17.0    | 61.6     | 9.3  | 50.9 |
|          |        | CFLOW-AD <a href="#">Gudovskiy et al. (2022)</a> | 64.3 | 90.1                 | 90.2        | 79.1 | 4.0                  | 7.8     | 35.9     | 4.1  | 56.6 |
|          |        | PyramidalFlow <a href="#">Lei et al. (2023)</a>  | 47.8 | 85.3                 | 90.2        | 68.0 | 2.7                  | 5.9     | 22.1     | 3.0  | 49.6 |
|          | Rec.   | RD <a href="#">Deng &amp; Li (2022)</a>          | 64.3 | 91.8                 | 90.2        | 64.7 | 2.0                  | 4.8     | 20.3     | 2.5  | 52.5 |
|          |        | DiAD <a href="#">He et al. (2024b)</a>           | 56.5 | 79.2                 | 93.9        | 73.2 | 2.9                  | 7.0     | 30.8     | 3.6  | 49.1 |
|          |        | ViTAD <a href="#">Zhang et al. (2023a)</a>       | 46.1 | 84.4                 | 90.2        | 62.9 | 1.9                  | 4.2     | 17.3     | 2.2  | 47.6 |
|          |        | InvAD <a href="#">Zhang et al. (2024a)</a>       | 45.2 | 86.6                 | 90.2        | 68.4 | 2.3                  | 5.0     | 22.0     | 2.6  | 49.2 |
|          |        | InvAD-lite <a href="#">Zhang et al. (2024a)</a>  | 50.4 | 83.8                 | 90.2        | 67.4 | 2.2                  | 4.9     | 18.6     | 2.5  | 49.0 |
|          |        | MambaAD <a href="#">He et al. (2024a)</a>        | 53.0 | 84.0                 | 90.2        | 66.6 | 2.1                  | 4.8     | 17.0     | 2.4  | 49.2 |
|          | Hybrid | UniAD <a href="#">You et al. (2022)</a>          | 32.2 | 75.9                 | 90.2        | 81.2 | 4.8                  | 10.1    | 44.9     | 5.3  | 50.7 |
|          |        | RD++ <a href="#">Tien et al. (2023)</a>          | 22.6 | 73.5                 | 90.2        | 70.9 | 2.5                  | 5.8     | 26.5     | 3.0  | 44.3 |
|          |        | DesTSeg <a href="#">Zhang et al. (2023c)</a>     | 31.3 | 81.2                 | 90.2        | 48.6 | 1.3                  | 2.9     | 11.1     | 1.5  | 41.8 |
| Turtle   | Aug.   | DRAEM <a href="#">Zavrtanik et al. (2021)</a>    | 73.3 | 93.3                 | 89.4        | 47.9 | 1.3                  | 4.0     | 31.0     | 2.0  | 53.2 |
|          |        | SimpleNet <a href="#">Liu et al. (2023)</a>      | 95.2 | 99.0                 | 95.2        | 98.2 | 15.2                 | 24.7    | 93.1     | 14.1 | 77.1 |
|          | Emb.   | CFA <a href="#">Lee et al. (2022)</a>            | 100. | 100.                 | 100.        | 99.3 | 41.9                 | 43.0    | 96.8     | 27.4 | 85.1 |
|          |        | PatchCore <a href="#">Roth et al. (2022)</a>     | 100. | 100.                 | 100.        | 99.5 | 43.1                 | 48.4    | 97.9     | 31.9 | 86.1 |
|          |        | CFLOW-AD <a href="#">Gudovskiy et al. (2022)</a> | 99.0 | 99.8                 | 97.7        | 99.1 | 30.0                 | 34.8    | 96.7     | 21.1 | 82.0 |
|          |        | PyramidalFlow <a href="#">Lei et al. (2023)</a>  | 81.9 | 95.6                 | 90.5        | 97.7 | 15.1                 | 24.5    | 92.8     | 13.9 | 73.4 |
|          | Rec.   | RD <a href="#">Deng &amp; Li (2022)</a>          | 90.5 | 98.0                 | 92.3        | 98.4 | 22.8                 | 29.0    | 94.4     | 17.0 | 77.4 |
|          |        | DiAD <a href="#">He et al. (2024b)</a>           | 96.2 | 99.1                 | 95.5        | 93.2 | 7.0                  | 13.8    | 82.6     | 7.4  | 69.6 |
|          |        | ViTAD <a href="#">Zhang et al. (2023a)</a>       | 83.8 | 96.0                 | 91.3        | 95.6 | 6.3                  | 12.8    | 85.6     | 6.9  | 70.2 |
|          |        | InvAD <a href="#">Zhang et al. (2024a)</a>       | 100. | 100.                 | 100.        | 99.7 | 53.8                 | 55.4    | 98.7     | 38.3 | 88.5 |
|          |        | InvAD-lite <a href="#">Zhang et al. (2024a)</a>  | 96.2 | 99.2                 | 95.2        | 97.9 | 17.7                 | 25.3    | 94.8     | 14.5 | 77.9 |
|          |        | MambaAD <a href="#">He et al. (2024a)</a>        | 87.6 | 97.1                 | 91.3        | 96.3 | 13.7                 | 20.1    | 90.2     | 11.2 | 73.5 |
|          | Hybrid | UniAD <a href="#">You et al. (2022)</a>          | 94.3 | 98.7                 | 95.5        | 97.8 | 18.7                 | 28.5    | 89.6     | 16.6 | 77.4 |
|          |        | RD++ <a href="#">Tien et al. (2023)</a>          | 100. | 100.                 | 100.        | 99.2 | 24.3                 | 38.2    | 96.7     | 23.6 | 82.3 |
|          |        | DesTSeg <a href="#">Zhang et al. (2023c)</a>     | 67.6 | 90.7                 | 89.4        | 95.1 | 20.6                 | 26.3    | 86.2     | 15.2 | 69.8 |

Table A39: Benchmarked results on MAD\_Real dataset [Zhou et al. \(2024\)](#) by the suggested metrics in Sec. 3.3.

|         | Method | Image-level                                      |      |                      | Pixel-level |      |                      | mAU-PRO | mIoU-max | mAD  |      |
|---------|--------|--------------------------------------------------|------|----------------------|-------------|------|----------------------|---------|----------|------|------|
|         |        | mAU-ROC                                          | mAP  | mF <sub>1</sub> -max | mAU-ROC     | mAP  | mF <sub>1</sub> -max |         |          |      |      |
| Unicorn | Aug.   | DRAEM <a href="#">Zavrtanik et al. (2021)</a>    | 72.4 | 91.3                 | 91.3        | 47.5 | 0.2                  | 0.5     | 14.5     | 0.2  | 50.3 |
|         |        | SimpleNet <a href="#">Liu et al. (2023)</a>      | 17.1 | 70.1                 | 89.4        | 61.4 | 0.4                  | 1.5     | 23.8     | 0.7  | 40.3 |
|         |        | CFA <a href="#">Lee et al. (2022)</a>            | 34.3 | 76.8                 | 89.4        | 68.2 | 0.8                  | 3.5     | 33.8     | 1.8  | 46.7 |
|         | Emb.   | PatchCore <a href="#">Roth et al. (2022)</a>     | 43.8 | 74.1                 | 93.3        | 97.3 | 6.8                  | 14.1    | 90.3     | 7.6  | 61.3 |
|         |        | CFLOW-AD <a href="#">Gudovskiy et al. (2022)</a> | 72.4 | 93.2                 | 91.3        | 90.3 | 1.4                  | 3.0     | 66.6     | 1.5  | 63.0 |
|         |        | PyramidalFlow <a href="#">Lei et al. (2023)</a>  | 46.7 | 77.8                 | 89.4        | 83.6 | 0.9                  | 2.3     | 52.2     | 1.2  | 53.0 |
|         | Rec.   | RD <a href="#">Deng &amp; Li (2022)</a>          | 40.0 | 76.4                 | 89.4        | 77.0 | 0.6                  | 1.4     | 39.3     | 0.7  | 49.1 |
|         |        | DiAD <a href="#">He et al. (2024b)</a>           | 42.9 | 85.6                 | 89.4        | 83.4 | 0.8                  | 2.0     | 56.4     | 1.0  | 51.5 |
|         |        | ViTAD <a href="#">Zhang et al. (2023a)</a>       | 20.0 | 68.6                 | 89.4        | 74.7 | 0.5                  | 1.1     | 32.1     | 0.6  | 43.2 |
|         |        | InvAD <a href="#">Zhang et al. (2024a)</a>       | 37.1 | 76.5                 | 89.4        | 85.3 | 1.0                  | 2.5     | 54.8     | 1.3  | 51.8 |
|         |        | InvAD-lite <a href="#">Zhang et al. (2024a)</a>  | 40.0 | 75.4                 | 89.4        | 79.0 | 0.9                  | 2.3     | 51.5     | 1.2  | 50.8 |
|         |        | MambaAD <a href="#">He et al. (2024a)</a>        | 18.1 | 70.9                 | 89.4        | 79.1 | 0.9                  | 3.1     | 47.0     | 1.6  | 46.0 |
|         | Hybrid | UniAD <a href="#">You et al. (2022)</a>          | 21.9 | 68.2                 | 89.4        | 91.8 | 1.7                  | 4.1     | 72.6     | 2.1  | 51.2 |
|         |        | RD++ <a href="#">Tien et al. (2023)</a>          | 37.1 | 77.2                 | 89.4        | 83.1 | 0.8                  | 1.8     | 48.4     | 0.9  | 50.7 |
|         |        | DesTSeg <a href="#">Zhang et al. (2023c)</a>     | 33.3 | 74.0                 | 89.4        | 59.0 | 0.4                  | 1.3     | 29.3     | 0.7  | 44.0 |
| Whale   | Aug.   | DRAEM <a href="#">Zavrtanik et al. (2021)</a>    | 46.2 | 89.5                 | 92.8        | 42.6 | 0.3                  | 1.5     | 25.6     | 0.7  | 46.8 |
|         |        | SimpleNet <a href="#">Liu et al. (2023)</a>      | 86.2 | 97.4                 | 94.1        | 96.4 | 5.6                  | 11.7    | 86.4     | 6.2  | 71.3 |
|         |        | CFA <a href="#">Lee et al. (2022)</a>            | 80.0 | 96.2                 | 93.5        | 98.6 | 29.5                 | 32.8    | 90.5     | 19.6 | 76.4 |
|         | Emb.   | PatchCore <a href="#">Roth et al. (2022)</a>     | 95.0 | 99.1                 | 98.5        | 99.7 | 46.8                 | 47.4    | 97.8     | 31.0 | 85.2 |
|         |        | CFLOW-AD <a href="#">Gudovskiy et al. (2022)</a> | 73.1 | 95.3                 | 92.8        | 99.1 | 19.6                 | 30.1    | 95.0     | 17.7 | 74.0 |
|         |        | PyramidalFlow <a href="#">Lei et al. (2023)</a>  | 90.6 | 98.1                 | 98.5        | 97.4 | 9.3                  | 15.4    | 88.7     | 8.3  | 74.2 |
|         | Rec.   | RD <a href="#">Deng &amp; Li (2022)</a>          | 48.8 | 89.5                 | 92.8        | 98.7 | 15.6                 | 21.0    | 93.7     | 11.7 | 67.1 |
|         |        | DiAD <a href="#">He et al. (2024b)</a>           | 11.9 | 76.2                 | 92.8        | 94.0 | 1.7                  | 4.4     | 76.4     | 2.2  | 51.0 |
|         |        | ViTAD <a href="#">Zhang et al. (2023a)</a>       | 58.8 | 91.4                 | 92.8        | 96.8 | 4.1                  | 9.8     | 85.2     | 5.2  | 65.0 |
|         |        | InvAD <a href="#">Zhang et al. (2024a)</a>       | 100. | 100.                 | 100.        | 99.8 | 49.4                 | 53.9    | 98.6     | 36.9 | 87.7 |
|         |        | InvAD-lite <a href="#">Zhang et al. (2024a)</a>  | 96.9 | 99.5                 | 97.0        | 99.6 | 34.2                 | 37.8    | 98.5     | 23.3 | 82.7 |
|         |        | MambaAD <a href="#">He et al. (2024a)</a>        | 86.9 | 97.9                 | 92.8        | 99.1 | 19.3                 | 28.1    | 96.5     | 16.4 | 76.6 |
|         | Hybrid | UniAD <a href="#">You et al. (2022)</a>          | 36.2 | 83.4                 | 92.8        | 97.8 | 8.2                  | 14.9    | 89.7     | 8.0  | 61.7 |
|         |        | RD++ <a href="#">Tien et al. (2023)</a>          | 88.8 | 97.8                 | 97.0        | 99.3 | 29.9                 | 32.3    | 96.0     | 19.2 | 79.5 |
|         |        | DesTSeg <a href="#">Zhang et al. (2023c)</a>     | 75.6 | 92.1                 | 95.4        | 94.1 | 6.3                  | 12.9    | 81.9     | 6.9  | 68.2 |
| Avg     | Aug.   | DRAEM <a href="#">Zavrtanik et al. (2021)</a>    | 59.1 | 88.1                 | 90.4        | 49.4 | 0.6                  | 1.7     | 22.3     | 0.8  | 48.9 |
|         |        | SimpleNet <a href="#">Liu et al. (2023)</a>      | 47.8 | 81.9                 | 90.7        | 83.1 | 5.4                  | 11.6    | 59.8     | 6.3  | 56.7 |
|         |        | CFA <a href="#">Lee et al. (2022)</a>            | 49.3 | 81.7                 | 91.4        | 83.3 | 10.5                 | 15.2    | 64.2     | 8.7  | 58.7 |
|         | Emb.   | PatchCore <a href="#">Roth et al. (2022)</a>     | 59.7 | 84.8                 | 93.5        | 95.4 | 20.2                 | 27.3    | 85.5     | 16.6 | 68.2 |
|         |        | CFLOW-AD <a href="#">Gudovskiy et al. (2022)</a> | 59.8 | 86.0                 | 91.2        | 90.9 | 10.7                 | 15.4    | 74.4     | 8.8  | 63.4 |
|         |        | PyramidalFlow <a href="#">Lei et al. (2023)</a>  | 52.1 | 83.6                 | 90.3        | 88.4 | 5.0                  | 9.4     | 68.2     | 5.1  | 59.0 |
|         | Rec.   | RD <a href="#">Deng &amp; Li (2022)</a>          | 55.5 | 85.8                 | 90.6        | 87.0 | 8.2                  | 12.8    | 67.8     | 7.2  | 60.6 |
|         |        | DiAD <a href="#">He et al. (2024b)</a>           | 49.9 | 85.1                 | 90.8        | 87.7 | 2.9                  | 6.8     | 67.4     | 3.6  | 55.8 |
|         |        | ViTAD <a href="#">Zhang et al. (2023a)</a>       | 47.0 | 81.3                 | 90.2        | 87.3 | 4.5                  | 9.3     | 66.6     | 5.0  | 57.4 |
|         |        | InvAD <a href="#">Zhang et al. (2024a)</a>       | 66.5 | 87.7                 | 93.8        | 88.3 | 22.1                 | 26.2    | 73.2     | 16.8 | 67.6 |
|         |        | InvAD-lite <a href="#">Zhang et al. (2024a)</a>  | 60.4 | 84.3                 | 92.2        | 88.2 | 9.0                  | 14.3    | 72.9     | 8.1  | 62.5 |
|         |        | MambaAD <a href="#">He et al. (2024a)</a>        | 56.2 | 84.3                 | 90.3        | 87.8 | 7.5                  | 12.8    | 68.5     | 7.2  | 60.5 |
|         | Hybrid | UniAD <a href="#">You et al. (2022)</a>          | 47.6 | 81.3                 | 90.4        | 88.2 | 5.8                  | 10.6    | 68.6     | 5.8  | 58.2 |
|         |        | RD++ <a href="#">Tien et al. (2023)</a>          | 54.7 | 83.9                 | 92.3        | 88.5 | 9.4                  | 14.9    | 70.4     | 8.5  | 61.4 |
|         |        | DesTSeg <a href="#">Zhang et al. (2023c)</a>     | 45.4 | 80.3                 | 90.7        | 72.7 | 5.0                  | 8.2     | 48.3     | 4.5  | 52.8 |

## J DETAILED QUANTITATIVE RESULTS ON MAD\_SIM DATASET UNDER 100 EPOCHS

Table A40: Benchmarked results on MAD\_Sim dataset [Zhou et al. \(2024\)](#) by the suggested metrics in [Sec. 3.3](#).

|           | Method                                             | Image-level |             |                      | Pixel-level |             |                      | mAU-PRO     | mIoU-max    | mAD         |
|-----------|----------------------------------------------------|-------------|-------------|----------------------|-------------|-------------|----------------------|-------------|-------------|-------------|
|           |                                                    | mAU-ROC     | mAP         | mF <sub>1</sub> -max | mAU-ROC     | mAP         | mF <sub>1</sub> -max |             |             |             |
| 01Gorilla | Aug. DRAEM <a href="#">Zavrtanik et al. (2021)</a> | 62.6        | 94.3        | 94.9                 | 50.1        | 0.7         | 1.8                  | 20.9        | 0.9         | 51.2        |
|           | SimpleNet <a href="#">Liu et al. (2023)</a>        | 62.7        | 94.7        | 94.9                 | 91.1        | 8.0         | 15.0                 | 69.5        | 8.1         | 65.0        |
|           | Emb. CFA <a href="#">Lee et al. (2022)</a>         | 56.4        | 93.3        | 94.9                 | 80.3        | 9.9         | 19.5                 | 63.7        | 10.8        | 62.4        |
|           | CFLOW-AD <a href="#">Gudovskiy et al. (2022)</a>   | 51.4        | 92.1        | <b>95.1</b>          | 90.8        | 4.6         | 5.2                  | 65.1        | 2.7         | 60.5        |
|           | PyramidalFlow <a href="#">Lei et al. (2023)</a>    | 39.2        | 89.3        | 94.9                 | 87.3        | 3.3         | 5.0                  | 70.3        | 2.6         | 58.0        |
|           | RD <a href="#">Deng &amp; Li (2022)</a>            | 57.6        | 92.0        | 94.9                 | 93.3        | 4.9         | 9.6                  | 77.2        | 5.0         | 63.9        |
|           | DiAD <a href="#">He et al. (2024b)</a>             | <b>78.2</b> | <b>97.3</b> | 94.9                 | 91.3        | 3.4         | 8.1                  | 63.2        | 4.2         | 62.3        |
|           | ViTAD <a href="#">Zhang et al. (2023a)</a>         | 62.4        | 92.9        | <b>95.1</b>          | <u>93.5</u> | 5.3         | 10.0                 | 76.1        | 5.3         | 64.8        |
|           | InvAD <a href="#">Zhang et al. (2024a)</a>         | 66.9        | <u>95.3</u> | 94.9                 | <b>95.1</b> | <b>15.8</b> | <b>25.2</b>          | <b>82.8</b> | <b>14.4</b> | <b>70.2</b> |
|           | InvAD-lite <a href="#">Zhang et al. (2024a)</a>    | 68.9        | 95.0        | <b>95.1</b>          | <u>93.6</u> | 6.7         | 12.9                 | <u>78.5</u> | 6.9         | <u>67.1</u> |
|           | MambaAD <a href="#">He et al. (2024a)</a>          | 72.0        | 95.5        | 94.9                 | 92.8        | 5.5         | 10.4                 | 75.6        | 5.5         | <u>66.8</u> |
|           | Hybrid UniAD <a href="#">You et al. (2022)</a>     | 49.6        | 91.1        | 94.9                 | 91.9        | 4.1         | 7.9                  | 76.1        | 4.1         | 61.8        |
|           | RD++ <a href="#">Tien et al. (2023)</a>            | 54.9        | 91.1        | <u>94.9</u>          | 92.9        | 4.2         | 8.5                  | 75.8        | 4.5         | 62.8        |
|           | DesTSeg <a href="#">Zhang et al. (2023c)</a>       | 55.4        | 92.5        | 94.9                 | 54.4        | 4.2         | 6.3                  | 32.1        | 3.2         | 52.6        |
|           | Aug. DRAEM <a href="#">Zavrtanik et al. (2021)</a> | 51.6        | 91.4        | <u>95.2</u>          | 57.1        | 0.7         | 0.9                  | 23.6        | 0.5         | 50.0        |
|           | SimpleNet <a href="#">Liu et al. (2023)</a>        | 76.0        | 96.7        | <u>95.2</u>          | 83.7        | 2.0         | 5.0                  | 59.4        | 2.6         | 63.4        |
| 02Unicom  | Emb. CFA <a href="#">Lee et al. (2022)</a>         | 66.3        | 95.7        | <b>95.5</b>          | 72.7        | 1.3         | 2.9                  | 43.6        | 1.5         | <u>58.0</u> |
|           | CFLOW-AD <a href="#">Gudovskiy et al. (2022)</a>   | 53.7        | 93.0        | <u>95.2</u>          | 84.5        | 2.6         | 3.7                  | 55.2        | 1.9         | 58.6        |
|           | PyramidalFlow <a href="#">Lei et al. (2023)</a>    | 42.9        | 89.5        | <b>95.5</b>          | 73.4        | 0.8         | 1.8                  | 46.3        | 0.9         | 53.3        |
|           | RD <a href="#">Deng &amp; Li (2022)</a>            | 60.1        | 93.9        | <u>95.2</u>          | 85.3        | 2.0         | 4.2                  | 71.4        | 2.1         | 61.9        |
|           | DiAD <a href="#">He et al. (2024b)</a>             | 71.0        | 96.6        | <u>95.2</u>          | 78.9        | 1.4         | 3.9                  | 45.8        | 2.0         | 56.1        |
|           | ViTAD <a href="#">Zhang et al. (2023a)</a>         | 63.8        | 95.2        | <u>95.2</u>          | 86.4        | 2.4         | 5.6                  | 67.6        | 2.9         | 62.6        |
|           | InvAD <a href="#">Zhang et al. (2024a)</a>         | <b>79.4</b> | <b>97.5</b> | 95.4                 | <b>87.5</b> | 4.1         | <b>11.1</b>          | <b>75.6</b> | <b>5.9</b>  | <b>67.7</b> |
|           | InvAD-lite <a href="#">Zhang et al. (2024a)</a>    | <u>72.4</u> | 96.6        | <u>95.2</u>          | <u>86.2</u> | 2.5         | 5.4                  | <u>73.2</u> | 2.8         | 64.9        |
|           | MambaAD <a href="#">He et al. (2024a)</a>          | 66.8        | 95.7        | <u>95.2</u>          | 84.6        | 2.7         | 5.4                  | 69.6        | 2.8         | 63.2        |
|           | Hybrid UniAD <a href="#">You et al. (2022)</a>     | 64.7        | 95.1        | <u>95.2</u>          | 86.2        | 2.1         | 5.3                  | 61.9        | 2.7         | 61.9        |
|           | RD++ <a href="#">Tien et al. (2023)</a>            | 64.4        | 94.5        | <u>95.2</u>          | 85.3        | 2.2         | 4.8                  | 69.5        | 2.5         | 62.6        |
|           | DesTSeg <a href="#">Zhang et al. (2023c)</a>       | 68.3        | 95.5        | <b>95.5</b>          | 53.2        | <b>4.7</b>  | 6.4                  | 29.3        | 3.3         | 54.9        |
|           | Aug. DRAEM <a href="#">Zavrtanik et al. (2021)</a> | 38.8        | 88.1        | <b>95.4</b>          | 49.8        | 1.3         | 1.9                  | 18.2        | 1.0         | 46.0        |
|           | SimpleNet <a href="#">Liu et al. (2023)</a>        | 36.2        | 87.6        | <b>95.4</b>          | 84.9        | 4.8         | <u>12.1</u>          | 55.4        | 6.4         | 56.2        |
|           | Emb. CFA <a href="#">Lee et al. (2022)</a>         | 32.2        | 87.5        | <b>95.4</b>          | 75.4        | 4.6         | <u>12.8</u>          | 46.7        | 6.9         | 53.3        |
|           | CFLOW-AD <a href="#">Gudovskiy et al. (2022)</a>   | 41.3        | 91.4        | <b>95.4</b>          | 84.9        | 3.7         | 5.1                  | 53.1        | 2.6         | 56.4        |
| 03Mallard | PyramidalFlow <a href="#">Lei et al. (2023)</a>    | 46.0        | 88.7        | <b>95.4</b>          | 82.1        | 2.4         | 4.9                  | 55.0        | 2.5         | 56.4        |
|           | RD <a href="#">Deng &amp; Li (2022)</a>            | 47.9        | 91.2        | <b>95.4</b>          | 84.3        | 4.5         | 9.1                  | 57.9        | 4.8         | 58.6        |
|           | DiAD <a href="#">He et al. (2024b)</a>             | <b>74.2</b> | <b>96.4</b> | <b>95.4</b>          | 82.4        | 2.3         | 4.5                  | 47.5        | 2.3         | 57.5        |
|           | ViTAD <a href="#">Zhang et al. (2023a)</a>         | 44.9        | 91.3        | <b>95.4</b>          | <u>85.5</u> | <u>5.8</u>  | 11.9                 | 60.4        | 6.3         | <u>59.0</u> |
|           | InvAD <a href="#">Zhang et al. (2024a)</a>         | 44.7        | 90.0        | <b>95.4</b>          | <b>85.9</b> | <b>7.2</b>  | <b>14.5</b>          | <b>61.6</b> | <b>7.8</b>  | <u>59.5</u> |
|           | InvAD-lite <a href="#">Zhang et al. (2024a)</a>    | 39.9        | 89.3        | <b>95.4</b>          | 85.1        | <u>5.2</u>  | 11.7                 | 59.6        | 6.2         | 57.6        |
|           | MambaAD <a href="#">He et al. (2024a)</a>          | 57.4        | 93.6        | <b>95.4</b>          | 84.1        | 5.1         | 10.5                 | 57.6        | 5.5         | <b>60.7</b> |
|           | Hybrid UniAD <a href="#">You et al. (2022)</a>     | 29.6        | 86.4        | <b>95.4</b>          | <u>85.3</u> | 3.4         | 8.6                  | 59.5        | 4.5         | 54.8        |
|           | RD++ <a href="#">Tien et al. (2023)</a>            | 41.2        | 88.7        | <b>95.4</b>          | 84.2        | 3.5         | 7.8                  | 57.7        | 4.1         | 56.7        |
|           | DesTSeg <a href="#">Zhang et al. (2023c)</a>       | 32.1        | 88.0        | <b>95.4</b>          | 56.5        | 3.7         | 7.8                  | 32.2        | 4.0         | 48.4        |
|           | Aug. DRAEM <a href="#">Zavrtanik et al. (2021)</a> | 40.6        | 87.6        | 94.9                 | 53.6        | 1.0         | 1.3                  | 27.2        | 0.7         | 47.6        |
|           | SimpleNet <a href="#">Liu et al. (2023)</a>        | 41.9        | 90.6        | 94.9                 | 82.8        | 2.9         | 6.0                  | 51.7        | 3.1         | 55.8        |
|           | Emb. CFA <a href="#">Lee et al. (2022)</a>         | 27.8        | 87.2        | <u>94.9</u>          | 71.7        | 2.6         | 3.9                  | 45.7        | 2.0         | 50.5        |
|           | CFLOW-AD <a href="#">Gudovskiy et al. (2022)</a>   | 64.5        | 94.5        | 94.9                 | 86.5        | 4.2         | 6.4                  | 58.0        | 3.3         | 61.7        |
|           | PyramidalFlow <a href="#">Lei et al. (2023)</a>    | 33.7        | 86.7        | 94.9                 | 80.1        | 1.6         | 4.0                  | 48.3        | 2.0         | 52.6        |
| 04Turtle  | RD <a href="#">Deng &amp; Li (2022)</a>            | 62.7        | 93.7        | 94.9                 | 91.3        | 9.4         | 16.9                 | 72.5        | 9.2         | 65.6        |
|           | DiAD <a href="#">He et al. (2024b)</a>             | <b>86.2</b> | <b>98.4</b> | <b>95.8</b>          | 91.2        | 6.1         | 12.6                 | 60.9        | 6.7         | 64.4        |
|           | ViTAD <a href="#">Zhang et al. (2023a)</a>         | 59.0        | 93.6        | <u>94.9</u>          | 90.8        | 7.8         | 15.6                 | 70.0        | 8.5         | 64.3        |
|           | InvAD <a href="#">Zhang et al. (2024a)</a>         | 75.8        | 96.0        | <u>95.1</u>          | <b>93.1</b> | <b>13.5</b> | <b>24.6</b>          | <b>78.5</b> | <b>14.0</b> | <b>70.7</b> |
|           | InvAD-lite <a href="#">Zhang et al. (2024a)</a>    | 61.8        | 93.7        | 94.9                 | 91.8        | <u>10.8</u> | <u>19.7</u>          | <u>74.2</u> | <u>10.9</u> | <u>66.3</u> |
|           | MambaAD <a href="#">He et al. (2024a)</a>          | 68.9        | 95.5        | 94.9                 | 91.0        | 9.3         | 18.0                 | 71.2        | 9.9         | <u>66.9</u> |
|           | Hybrid UniAD <a href="#">You et al. (2022)</a>     | 45.1        | 88.6        | 94.9                 | 87.2        | 3.2         | 5.8                  | 66.0        | 3.0         | 58.4        |
|           | RD++ <a href="#">Tien et al. (2023)</a>            | 61.9        | 94.4        | <u>94.9</u>          | 90.5        | 6.9         | 12.8                 | 71.2        | 6.8         | 64.5        |
|           | DesTSeg <a href="#">Zhang et al. (2023c)</a>       | 35.2        | 89.3        | <u>94.9</u>          | 52.3        | 2.6         | 4.0                  | 36.6        | 2.0         | 48.5        |

Table A41: Benchmarked results on MAD\_Sim dataset Zhou et al. (2024) by the suggested metrics in Sec. 3.3.

|              | Method                             | Image-level |             |                      | Pixel-level |             |                      | mAU-PRO     | mIoU-max    | mAD         |
|--------------|------------------------------------|-------------|-------------|----------------------|-------------|-------------|----------------------|-------------|-------------|-------------|
|              |                                    | mAU-ROC     | mAP         | mF <sub>1</sub> -max | mAU-ROC     | mAP         | mF <sub>1</sub> -max |             |             |             |
| 05Whale      | Aug. DRAEM Zavrtanik et al. (2021) | 54.6        | 91.4        | 94.4                 | 47.3        | 0.7         | 1.4                  | 25.9        | 0.7         | 49.5        |
|              | SimpleNet Liu et al. (2023)        | 63.1        | 93.9        | 94.4                 | 82.6        | 2.3         | 4.9                  | 60.5        | 2.5         | 60.7        |
|              | Emb. CFA Lee et al. (2022)         | 65.2        | 94.4        | 94.4                 | 73.4        | 2.3         | 3.8                  | 54.3        | 1.9         | 59.1        |
|              | CFLOW-AD Gudovskiy et al. (2022)   | 54.5        | 91.0        | 94.4                 | 85.4        | 2.7         | 4.4                  | 63.3        | 2.2         | 59.5        |
|              | PyramidalFlow Lei et al. (2023)    | 37.9        | 84.7        | 94.4                 | 73.6        | 1.0         | 2.4                  | 49.4        | 1.2         | 52.0        |
|              | Rec. RD Deng & Li (2022)           | 56.5        | 92.6        | 94.5                 | 87.0        | 3.6         | 7.1                  | 74.8        | 3.7         | 62.2        |
|              | DiAD He et al. (2024b)             | 48.7        | 91.0        | 94.4                 | 80.3        | 2.3         | 6.6                  | 50.3        | 3.4         | 53.4        |
|              | ViTAD Zhang et al. (2023a)         | 58.0        | 92.5        | 94.4                 | 88.3        | 4.0         | 8.4                  | 76.0        | 4.4         | 62.9        |
|              | InvAD Zhang et al. (2024a)         | <b>75.7</b> | <b>96.6</b> | 94.4                 | <b>89.7</b> | <b>8.6</b>  | <b>17.6</b>          | <b>81.5</b> | <b>9.6</b>  | <b>69.1</b> |
|              | InvAD-lite Zhang et al. (2024a)    | 64.9        | 94.5        | 94.4                 | 89.0        | 6.1         | 11.7                 | 78.5        | 6.2         | 65.5        |
|              | MambaAD He et al. (2024a)          | 60.2        | 93.5        | 94.4                 | 87.5        | 4.9         | 9.8                  | 74.4        | 5.1         | 63.4        |
|              | Hybrid UniAD You et al. (2022)     | 72.4        | 95.7        | 94.5                 | 89.5        | 3.8         | 8.2                  | 76.9        | 4.3         | 66.1        |
|              | RD++ Tien et al. (2023)            | 52.4        | 91.7        | 94.4                 | 86.7        | 3.7         | 8.0                  | 74.4        | 4.1         | 61.4        |
|              | DesTSeg Zhang et al. (2023c)       | 52.0        | 91.5        | 94.4                 | 58.1        | 4.2         | 9.0                  | 45.7        | 4.7         | 54.3        |
|              | Aug. DRAEM Zavrtanik et al. (2021) | 44.4        | 88.1        | 94.4                 | 44.1        | 1.0         | 2.0                  | 23.7        | 1.0         | 46.7        |
|              | SimpleNet Liu et al. (2023)        | 63.6        | 93.5        | 94.4                 | 90.3        | 5.5         | 9.1                  | 71.1        | 4.8         | 63.9        |
| 06Bird       | Emb. CFA Lee et al. (2022)         | 65.7        | 92.3        | 94.7                 | 83.8        | 4.6         | 10.8                 | 62.3        | 5.7         | 62.3        |
|              | CFLOW-AD Gudovskiy et al. (2022)   | 63.8        | 91.5        | 94.4                 | 90.4        | 3.9         | 7.1                  | 70.9        | 3.7         | 63.2        |
|              | PyramidalFlow Lei et al. (2023)    | 75.7        | 96.1        | 94.4                 | 92.6        | <b>7.0</b>  | <b>13.5</b>          | 76.6        | <b>7.2</b>  | 68.1        |
|              | Rec. RD Deng & Li (2022)           | 58.5        | 91.8        | 94.4                 | 90.6        | 4.7         | 8.3                  | 75.4        | 4.3         | 63.2        |
|              | DiAD He et al. (2024b)             | 79.5        | 97.3        | <b>95.4</b>          | <b>93.3</b> | 6.0         | 12.4                 | 77.0        | 6.6         | 65.9        |
|              | ViTAD Zhang et al. (2023a)         | 64.4        | 93.3        | 94.5                 | 91.2        | 4.8         | 9.8                  | 75.9        | 5.1         | 64.7        |
|              | InvAD Zhang et al. (2024a)         | <b>83.3</b> | <b>97.6</b> | 94.7                 | 91.9        | 6.7         | 12.5                 | <b>78.5</b> | 6.7         | <b>69.6</b> |
|              | InvAD-lite Zhang et al. (2024a)    | 74.8        | 95.6        | 94.7                 | 91.5        | 5.6         | 9.9                  | 77.2        | 5.2         | 67.2        |
|              | MambaAD He et al. (2024a)          | 64.5        | 93.7        | 94.5                 | 91.2        | 5.0         | 9.1                  | 76.4        | 4.7         | 64.8        |
|              | Hybrid UniAD You et al. (2022)     | 51.3        | 89.6        | 94.4                 | 90.2        | 3.9         | 7.5                  | 73.0        | 3.9         | 61.0        |
|              | RD++ Tien et al. (2023)            | 62.9        | 92.1        | 94.5                 | 90.9        | 4.7         | 8.3                  | 75.7        | 4.4         | 64.0        |
|              | DesTSeg Zhang et al. (2023c)       | 57.1        | 91.6        | 94.4                 | 52.2        | 4.0         | 4.6                  | 25.6        | 2.4         | 51.3        |
|              | Aug. DRAEM Zavrtanik et al. (2021) | 59.2        | 88.7        | 92.8                 | 47.6        | 0.7         | 1.8                  | 27.1        | 0.9         | 49.8        |
|              | SimpleNet Liu et al. (2023)        | 67.0        | 92.0        | <b>93.4</b>          | 88.8        | 3.5         | 7.5                  | 66.8        | 3.9         | 62.9        |
|              | Emb. CFA Lee et al. (2022)         | 58.3        | 90.8        | 93.0                 | 73.4        | 3.2         | 7.4                  | 53.8        | 3.8         | 57.6        |
|              | CFLOW-AD Gudovskiy et al. (2022)   | 64.1        | 91.9        | 92.8                 | 90.0        | 5.7         | 5.0                  | 66.4        | 2.6         | 62.4        |
| 07Owl        | PyramidalFlow Lei et al. (2023)    | 44.7        | 85.0        | 93.0                 | 85.3        | 2.2         | 5.2                  | 64.2        | 2.7         | 56.7        |
|              | Rec. RD Deng & Li (2022)           | 63.4        | 92.2        | 93.0                 | 91.9        | 5.0         | 9.2                  | 77.9        | 4.8         | 64.4        |
|              | DiAD He et al. (2024b)             | 62.6        | 92.5        | 92.8                 | 93.8        | 4.9         | 10.2                 | 71.6        | 5.3         | 61.2        |
|              | ViTAD Zhang et al. (2023a)         | 66.8        | 92.3        | 92.8                 | 92.5        | 5.0         | 10.2                 | 77.6        | 5.4         | 65.1        |
|              | InvAD Zhang et al. (2024a)         | <b>71.0</b> | <b>93.8</b> | <b>93.4</b>          | <b>94.0</b> | 10.3        | <b>19.4</b>          | <b>82.5</b> | <b>10.8</b> | <b>68.8</b> |
|              | InvAD-lite Zhang et al. (2024a)    | 67.4        | 93.7        | 92.8                 | 92.4        | 6.5         | 11.9                 | 78.6        | 6.3         | 66.0        |
|              | MambaAD He et al. (2024a)          | 67.8        | 93.6        | 92.8                 | 91.2        | 4.6         | 8.2                  | 76.0        | 4.3         | 64.9        |
|              | Hybrid UniAD You et al. (2022)     | 61.1        | 91.5        | 93.0                 | 91.5        | 4.1         | 7.9                  | 74.3        | 4.1         | 63.2        |
|              | RD++ Tien et al. (2023)            | 69.4        | 93.4        | 92.8                 | 92.0        | 5.1         | 9.2                  | 78.2        | 4.8         | 65.7        |
|              | DesTSeg Zhang et al. (2023c)       | 65.2        | 92.6        | 93.2                 | 53.2        | <b>10.7</b> | 7.9                  | 35.5        | 4.1         | 55.2        |
|              | Aug. DRAEM Zavrtanik et al. (2021) | 60.4        | 90.6        | 93.2                 | 45.8        | 0.5         | 0.9                  | 24.3        | 0.4         | 49.6        |
|              | SimpleNet Liu et al. (2023)        | 54.4        | 90.2        | 93.0                 | 83.8        | 1.7         | 2.8                  | 57.6        | 1.4         | 57.8        |
|              | Emb. CFA Lee et al. (2022)         | 55.6        | 89.9        | 93.0                 | 76.3        | 2.5         | 5.1                  | 54.6        | 2.6         | 57.1        |
|              | CFLOW-AD Gudovskiy et al. (2022)   | 61.5        | 90.9        | 93.2                 | 86.7        | 1.8         | 3.4                  | 58.7        | 1.7         | 59.8        |
|              | PyramidalFlow Lei et al. (2023)    | 65.2        | 93.3        | 93.0                 | 77.6        | 1.1         | 2.4                  | 49.2        | 1.2         | 58.2        |
|              | Rec. RD Deng & Li (2022)           | 67.4        | 93.2        | 93.2                 | 87.9        | 2.1         | 3.6                  | 67.2        | 1.8         | 62.4        |
| 08Sabertooth | DiAD He et al. (2024b)             | <b>89.2</b> | <b>98.4</b> | <b>93.8</b>          | 85.1        | 1.5         | 3.0                  | 48.5        | 1.5         | 59.9        |
|              | ViTAD Zhang et al. (2023a)         | 61.8        | 91.9        | 93.2                 | 88.8        | 2.1         | 3.8                  | 67.5        | 2.0         | 61.4        |
|              | InvAD Zhang et al. (2024a)         | 73.7        | 94.9        | 93.0                 | <b>90.5</b> | 3.5         | <b>5.8</b>           | <b>74.0</b> | <b>3.0</b>  | <b>65.3</b> |
|              | InvAD-lite Zhang et al. (2024a)    | 69.3        | 93.7        | 93.2                 | 88.3        | 2.8         | 4.0                  | 68.0        | 2.1         | 63.1        |
|              | MambaAD He et al. (2024a)          | 63.3        | 92.5        | 93.2                 | 86.9        | 2.5         | 3.7                  | 63.9        | 1.9         | 61.1        |
|              | Hybrid UniAD You et al. (2022)     | 55.5        | 89.1        | 93.0                 | 88.2        | 2.1         | 3.7                  | 71.2        | 1.9         | 60.2        |
|              | RD++ Tien et al. (2023)            | 64.0        | 92.2        | 93.0                 | 87.7        | 2.2         | 3.7                  | 66.6        | 1.9         | 61.6        |
|              | DesTSeg Zhang et al. (2023c)       | 61.1        | 92.1        | 93.0                 | 51.6        | <b>4.5</b>  | <b>4.5</b>           | 31.0        | 2.3         | 52.5        |



Table A42: Benchmarked results on MAD\_Sim dataset Zhou et al. (2024) by the suggested metrics in Sec. 3.3.

|          | Method                           | Image-level |             |             | Pixel-level |             |             | mAU-PRO     | mIoU-max    | mAD         |
|----------|----------------------------------|-------------|-------------|-------------|-------------|-------------|-------------|-------------|-------------|-------------|
|          |                                  | mAU-ROC     | mAP         | mF1-max     | mAU-ROC     | mAP         | mF1-max     |             |             |             |
| 09Swan   | Aug.                             |             |             |             |             |             |             |             |             |             |
|          | DRAEM Zavrtanik et al. (2021)    | 41.6        | 83.8        | 93.1        | 44.7        | 0.6         | 1.0         | 23.4        | 0.5         | 45.1        |
|          | SimpleNet Liu et al. (2023)      | 52.6        | 89.0        | 93.1        | 83.7        | 2.0         | 4.8         | 58.1        | 2.4         | 57.7        |
|          | CFA Lee et al. (2022)            | 56.6        | 89.3        | 93.3        | 75.1        | 2.5         | 7.4         | 48.4        | 3.8         | 56.5        |
|          | Emb.                             |             |             |             |             |             |             |             |             |             |
|          | CFLOW-AD Gudovskiy et al. (2022) | 47.4        | 86.7        | 93.1        | 85.8        | 2.2         | 4.0         | 60.6        | 2.0         | 56.9        |
|          | PyramidalFlow Lei et al. (2023)  | 43.9        | 85.2        | 93.1        | 75.7        | 1.1         | 2.6         | 42.6        | 1.3         | 52.3        |
|          | RD Deng & Li (2022)              | 55.6        | 89.6        | 93.1        | 87.7        | 2.5         | 4.5         | 71.1        | 2.3         | 60.4        |
|          | DiAD He et al. (2024b)           | 59.6        | 90.5        | <b>93.8</b> | 86.8        | <b>5.9</b>  | <b>11.8</b> | 54.7        | <b>6.3</b>  | 57.6        |
|          | ViTAD Zhang et al. (2023a)       | 52.8        | 88.1        | 93.2        | 90.0        | 3.0         | 6.0         | 73.1        | 3.1         | 60.5        |
|          | InvAD Zhang et al. (2024a)       | <b>68.9</b> | <b>93.7</b> | 93.1        | <b>91.6</b> | <b>5.9</b>  | <b>11.5</b> | <b>80.1</b> | <b>6.1</b>  | <b>66.3</b> |
|          | InvAD-lite Zhang et al. (2024a)  | 59.9        | 90.7        | 93.1        | 89.8        | 4.0         | 7.8         | 76.1        | 4.1         | 62.8        |
|          | MambaAD He et al. (2024a)        | 54.7        | 88.7        | 93.1        | 87.2        | 2.4         | 4.3         | 69.0        | 2.2         | 59.8        |
|          | Rec.                             |             |             |             |             |             |             |             |             |             |
|          | UniAD You et al. (2022)          | 52.5        | 87.5        | 93.1        | 88.4        | 2.7         | 5.0         | 71.3        | 2.5         | 59.8        |
|          | RD++ Tien et al. (2023)          | 53.9        | 88.9        | 93.1        | 87.6        | 2.4         | 4.5         | 70.6        | 2.3         | 60.0        |
|          | DesTSeg Zhang et al. (2023c)     | 54.7        | 89.3        | 93.1        | 50.9        | 2.5         | 2.3         | 29.0        | 1.2         | 50.1        |
| 10Sheep  | Hybrid                           |             |             |             |             |             |             |             |             |             |
|          | DRAEM Zavrtanik et al. (2021)    | 44.9        | 86.4        | 92.7        | 44.1        | 0.8         | 1.7         | 27.5        | 0.9         | 46.6        |
|          | SimpleNet Liu et al. (2023)      | 60.4        | 91.3        | 92.7        | 90.5        | 3.8         | 6.8         | 76.8        | 3.5         | 63.0        |
|          | CFA Lee et al. (2022)            | 65.9        | 92.2        | 93.1        | 85.1        | 3.9         | 8.6         | 67.7        | 4.5         | 62.5        |
|          | Emb.                             |             |             |             |             |             |             |             |             |             |
|          | CFLOW-AD Gudovskiy et al. (2022) | 61.4        | 89.8        | 92.9        | 92.0        | 3.8         | 6.1         | 79.3        | 3.1         | 63.3        |
|          | PyramidalFlow Lei et al. (2023)  | 54.4        | 89.6        | 92.7        | 90.6        | 2.3         | 5.0         | 71.8        | 2.6         | 60.7        |
|          | RD Deng & Li (2022)              | 64.4        | 92.6        | 92.7        | 92.6        | 5.3         | 9.2         | 84.5        | 4.8         | 65.6        |
|          | DiAD He et al. (2024b)           | <b>85.0</b> | <b>96.8</b> | <b>94.1</b> | 93.3        | 4.1         | 8.5         | 76.0        | 4.4         | 65.4        |
|          | ViTAD Zhang et al. (2023a)       | 64.8        | 92.0        | 92.7        | 93.4        | 4.8         | 9.3         | 84.8        | 4.9         | 65.6        |
|          | InvAD Zhang et al. (2024a)       | 84.6        | <b>97.1</b> | 93.6        | <b>94.0</b> | <b>8.2</b>  | <b>13.6</b> | <b>87.1</b> | <b>7.3</b>  | <b>71.2</b> |
|          | InvAD-lite Zhang et al. (2024a)  | 78.7        | 95.9        | 93.4        | 93.5        | 6.7         | 10.1        | 85.2        | 5.3         | 69.1        |
|          | MambaAD He et al. (2024a)        | 70.1        | 93.8        | 92.9        | 92.8        | 5.5         | 9.4         | 84.0        | 4.9         | 66.8        |
|          | Rec.                             |             |             |             |             |             |             |             |             |             |
|          | UniAD You et al. (2022)          | 57.4        | 90.3        | 92.7        | 93.3        | 4.8         | 8.2         | 83.3        | 4.3         | 63.8        |
| 11Pig    | Hybrid                           |             |             |             |             |             |             |             |             |             |
|          | RD++ Tien et al. (2023)          | 71.4        | 94.2        | 92.9        | 92.7        | 6.2         | 10.6        | 84.3        | 5.6         | 67.3        |
|          | DesTSeg Zhang et al. (2023c)     | 67.5        | 93.7        | 92.7        | 53.1        | <b>8.5</b>  | 8.1         | 39.0        | 4.2         | 55.9        |
|          | DRAEM Zavrtanik et al. (2021)    | 51.2        | 90.2        | 94.0        | 54.8        | 1.0         | 1.6         | 28.9        | 0.8         | 50.0        |
|          | SimpleNet Liu et al. (2023)      | 54.8        | 90.9        | 94.0        | 94.0        | 6.4         | 12.8        | 75.7        | 6.8         | 63.6        |
|          | CFA Lee et al. (2022)            | 54.7        | 90.6        | 94.0        | 87.4        | 7.5         | 14.9        | 61.9        | 8.1         | 61.3        |
|          | Emb.                             |             |             |             |             |             |             |             |             |             |
|          | CFLOW-AD Gudovskiy et al. (2022) | 51.4        | 89.3        | 94.0        | 92.3        | 3.5         | 5.5         | 74.5        | 2.8         | 61.1        |
|          | PyramidalFlow Lei et al. (2023)  | 56.4        | 91.0        | 94.0        | 89.8        | 2.7         | 5.5         | 66.9        | 2.8         | 60.8        |
|          | RD Deng & Li (2022)              | 58.2        | 91.8        | 94.0        | 94.3        | 6.5         | 11.8        | 83.5        | 6.3         | 65.2        |
|          | DiAD He et al. (2024b)           | 44.0        | 90.1        | 94.0        | 93.7        | 9.4         | 16.8        | 70.9        | 9.2         | 59.9        |
|          | ViTAD Zhang et al. (2023a)       | 58.4        | 91.1        | 94.0        | 95.9        | 8.8         | 17.0        | 83.3        | 9.3         | 66.2        |
|          | InvAD Zhang et al. (2024a)       | <b>72.3</b> | <b>95.1</b> | <b>94.4</b> | <b>96.9</b> | <b>18.9</b> | <b>27.6</b> | <b>87.9</b> | <b>16.0</b> | <b>72.5</b> |
|          | InvAD-lite Zhang et al. (2024a)  | 71.8        | <b>95.1</b> | 94.2        | 96.3        | 16.4        | 24.4        | 86.4        | 13.9        | 71.5        |
|          | MambaAD He et al. (2024a)        | 67.4        | 94.2        | 94.2        | 95.2        | 10.6        | 18.5        | 84.5        | 10.2        | 68.7        |
| 12Zalika | Rec.                             |             |             |             |             |             |             |             |             |             |
|          | UniAD You et al. (2022)          | 46.7        | 86.8        | 94.0        | 93.6        | 3.8         | 7.3         | 78.8        | 3.8         | 60.9        |
|          | RD++ Tien et al. (2023)          | 58.7        | 92.1        | 94.0        | 94.7        | 7.2         | 14.1        | 83.9        | 7.6         | 65.8        |
|          | DesTSeg Zhang et al. (2023c)     | 63.0        | 92.9        | 94.0        | 57.5        | 7.1         | 11.7        | 37.9        | 6.2         | 55.9        |
|          | Hybrid                           |             |             |             |             |             |             |             |             |             |
|          | DRAEM Zavrtanik et al. (2021)    | 43.6        | 84.1        | 92.9        | 43.4        | 1.1         | 2.3         | 25.0        | 1.2         | 45.7        |
|          | SimpleNet Liu et al. (2023)      | 57.1        | 88.2        | <b>93.1</b> | 84.2        | 4.0         | 8.4         | 59.5        | 4.4         | 59.2        |
|          | CFA Lee et al. (2022)            | 54.8        | 90.0        | 92.9        | 73.9        | 4.2         | 9.2         | 53.5        | 4.8         | 57.2        |
|          | Emb.                             |             |             |             |             |             |             |             |             |             |
|          | CFLOW-AD Gudovskiy et al. (2022) | 51.4        | 88.0        | 92.9        | 86.0        | 4.4         | 6.9         | 55.3        | 3.6         | 57.8        |
|          | PyramidalFlow Lei et al. (2023)  | 43.8        | 85.3        | 92.9        | 79.1        | 2.2         | 4.1         | 57.5        | 2.1         | 54.9        |
|          | RD Deng & Li (2022)              | 59.3        | 92.0        | 92.9        | 87.2        | 4.9         | 8.6         | 69.9        | 4.5         | 62.0        |
|          | DiAD He et al. (2024b)           | 46.6        | 86.6        | 92.9        | 85.2        | 4.4         | 6.9         | 42.0        | 3.6         | 52.1        |
|          | ViTAD Zhang et al. (2023a)       | 54.9        | 91.0        | 92.9        | 87.3        | 4.7         | 8.7         | 67.5        | 4.6         | 60.8        |
|          | InvAD Zhang et al. (2024a)       | <b>64.0</b> | <b>92.3</b> | 92.9        | <b>90.2</b> | 10.0        | <b>18.1</b> | <b>76.5</b> | 10.0        | <b>65.9</b> |
|          | InvAD-lite Zhang et al. (2024a)  | 60.9        | 92.1        | 92.9        | 88.6        | 7.0         | 11.5        | 72.3        | 6.1         | 63.4        |
|          | MambaAD He et al. (2024a)        | 58.3        | 91.6        | 92.9        | 87.2        | 5.2         | 8.7         | 68.9        | 4.5         | 61.7        |
| 12Zalika | Rec.                             |             |             |             |             |             |             |             |             |             |
|          | UniAD You et al. (2022)          | 52.1        | 88.9        | 92.9        | 85.9        | 3.4         | 6.0         | 64.8        | 3.1         | 59.0        |
|          | RD++ Tien et al. (2023)          | 55.5        | 90.5        | 92.9        | 87.0        | 5.1         | 8.2         | 69.3        | 4.3         | 61.0        |
|          | DesTSeg Zhang et al. (2023c)     | 52.3        | 88.9        | 92.9        | 52.2        | 4.0         | 5.7         | 38.5        | 2.9         | 51.6        |



Table A43: Benchmarked results on MAD\_Sim dataset [Zhou et al. \(2024\)](#) by the suggested metrics in [Sec. 3.3](#).

|            | Method                                             | Image-level |             |                      | Pixel-level |            |                      | mAU-PRO     | mIoU-max   | mAD         |
|------------|----------------------------------------------------|-------------|-------------|----------------------|-------------|------------|----------------------|-------------|------------|-------------|
|            |                                                    | mAU-ROC     | mAP         | mF <sub>1</sub> -max | mAU-ROC     | mAP        | mF <sub>1</sub> -max |             |            |             |
| 13Pheonix  | Aug. DRAEM <a href="#">Zavrtanik et al. (2021)</a> | 51.9        | 89.6        | 94.3                 | 45.4        | 0.6        | 1.0                  | 22.8        | 0.5        | 48.0        |
|            | SimpleNet <a href="#">Liu et al. (2023)</a>        | 55.7        | 90.2        | 94.4                 | 80.7        | 1.5        | 3.3                  | 56.9        | 1.7        | 57.9        |
|            | Emb. CFA <a href="#">Lee et al. (2022)</a>         | 54.1        | 90.4        | 94.3                 | 77.4        | 2.0        | 5.5                  | 58.0        | 2.8        | 57.7        |
|            | CFLOW-AD <a href="#">Gudovskiy et al. (2022)</a>   | 52.1        | 89.7        | 94.3                 | 82.4        | 1.4        | 2.7                  | 57.2        | 1.4        | 57.3        |
|            | PyramidalFlow <a href="#">Lei et al. (2023)</a>    | 48.0        | 87.6        | 94.3                 | 72.8        | 0.9        | 2.1                  | 54.1        | 1.0        | 54.6        |
|            | Rec. RD <a href="#">Deng &amp; Li (2022)</a>       | 53.5        | 90.5        | 94.3                 | 83.6        | 2.5        | 3.5                  | 70.0        | 1.8        | 59.7        |
|            | DiAD <a href="#">He et al. (2024b)</a>             | 41.5        | 86.8        | 94.3                 | 83.2        | 1.4        | 3.0                  | 49.1        | 1.5        | 51.3        |
|            | ViTAD <a href="#">Zhang et al. (2023a)</a>         | 52.6        | 89.9        | 94.3                 | 84.8        | 1.8        | 3.5                  | 68.4        | 1.8        | 59.3        |
|            | InvAD <a href="#">Zhang et al. (2024a)</a>         | <b>62.7</b> | <b>92.9</b> | <b>94.6</b>          | <b>87.0</b> | <b>3.6</b> | <b>7.2</b>           | <b>77.5</b> | <b>3.7</b> | <b>63.6</b> |
|            | InvAD-lite <a href="#">Zhang et al. (2024a)</a>    | 56.0        | 91.6        | 94.3                 | 85.3        | 3.2        | 5.3                  | 74.0        | 2.7        | 61.3        |
|            | MambaAD <a href="#">He et al. (2024a)</a>          | 55.7        | 91.7        | 94.4                 | 83.7        | 2.8        | 3.7                  | 70.7        | 1.9        | 60.4        |
|            | Hybrid UniAD <a href="#">You et al. (2022)</a>     | 55.1        | 90.2        | 94.3                 | 83.8        | 1.5        | 3.1                  | 64.5        | 1.6        | 59.0        |
|            | RD++ <a href="#">Tien et al. (2023)</a>            | 54.7        | 90.6        | 94.4                 | 84.1        | 1.9        | 3.6                  | 71.0        | 1.8        | 60.0        |
|            | DesTSeg <a href="#">Zhang et al. (2023c)</a>       | 53.3        | 91.0        | 94.3                 | 52.5        | 2.2        | 4.2                  | 35.5        | 2.1        | 51.6        |
|            | Aug. DRAEM <a href="#">Zavrtanik et al. (2021)</a> | 50.4        | 89.5        | <b>93.9</b>          | 52.4        | 1.1        | 1.9                  | 25.9        | 0.9        | 49.1        |
|            | SimpleNet <a href="#">Liu et al. (2023)</a>        | 58.7        | 91.9        | <b>93.9</b>          | 64.9        | 2.2        | 4.9                  | 54.8        | 2.5        | 56.6        |
| 14Elephant | Emb. CFA <a href="#">Lee et al. (2022)</a>         | 54.2        | 90.9        | <b>93.9</b>          | 61.8        | 1.9        | 3.8                  | 45.8        | 1.9        | 54.0        |
|            | CFLOW-AD <a href="#">Gudovskiy et al. (2022)</a>   | 55.7        | 91.4        | <b>93.9</b>          | 68.2        | 2.2        | 3.8                  | 49.7        | 1.9        | 55.7        |
|            | PyramidalFlow <a href="#">Lei et al. (2023)</a>    | 44.5        | 87.3        | <b>93.9</b>          | 63.7        | 1.4        | 3.1                  | 45.2        | 1.6        | 51.8        |
|            | Rec. RD <a href="#">Deng &amp; Li (2022)</a>       | 58.3        | 91.7        | <b>93.9</b>          | 69.9        | 2.9        | 6.6                  | 64.6        | 3.4        | 58.6        |
|            | DiAD <a href="#">He et al. (2024b)</a>             | <b>68.7</b> | <b>95.1</b> | <b>93.9</b>          | <b>74.2</b> | 1.9        | 3.9                  | 44.7        | 2.0        | 54.6        |
|            | ViTAD <a href="#">Zhang et al. (2023a)</a>         | 57.4        | 91.9        | <b>93.9</b>          | 70.8        | 3.1        | 7.4                  | 64.0        | 3.8        | 58.7        |
|            | InvAD <a href="#">Zhang et al. (2024a)</a>         | 63.1        | 93.3        | <b>93.9</b>          | 72.3        | 4.4        | <b>10.8</b>          | <b>68.4</b> | <b>5.7</b> | <b>61.2</b> |
|            | InvAD-lite <a href="#">Zhang et al. (2024a)</a>    | 66.2        | 94.2        | <b>93.9</b>          | 70.5        | 3.6        | 8.2                  | 66.0        | 4.3        | 60.9        |
|            | MambaAD <a href="#">He et al. (2024a)</a>          | 66.2        | 94.4        | <b>93.9</b>          | 69.6        | 3.1        | 7.2                  | 63.5        | 3.7        | 60.3        |
|            | Hybrid UniAD <a href="#">You et al. (2022)</a>     | 55.7        | 90.5        | <b>93.9</b>          | 68.5        | 1.9        | 4.1                  | 59.2        | 2.1        | 56.7        |
|            | RD++ <a href="#">Tien et al. (2023)</a>            | 60.7        | 92.5        | <b>93.9</b>          | 70.2        | 3.0        | 6.9                  | 63.5        | 3.6        | 59.1        |
|            | DesTSeg <a href="#">Zhang et al. (2023c)</a>       | 60.0        | 91.9        | <b>93.9</b>          | 53.5        | <b>5.3</b> | 8.1                  | 46.9        | 4.2        | 55.2        |
|            | Aug. DRAEM <a href="#">Zavrtanik et al. (2021)</a> | 52.8        | 86.4        | 91.8                 | 48.6        | 0.8        | 1.4                  | 24.1        | 0.7        | 47.9        |
|            | SimpleNet <a href="#">Liu et al. (2023)</a>        | 62.2        | 90.3        | 91.8                 | 80.3        | 2.4        | 4.8                  | 53.2        | 2.4        | 58.3        |
|            | Emb. CFA <a href="#">Lee et al. (2022)</a>         | 55.6        | 88.6        | 91.8                 | 69.4        | 2.2        | 5.0                  | 44.5        | 2.5        | 54.5        |
|            | CFLOW-AD <a href="#">Gudovskiy et al. (2022)</a>   | 52.9        | 86.3        | <b>92.0</b>          | 83.5        | 2.9        | 5.2                  | 60.5        | 2.7        | 57.5        |
| 15Parrot   | PyramidalFlow <a href="#">Lei et al. (2023)</a>    | <b>62.3</b> | 90.4        | <b>92.0</b>          | 81.5        | 3.0        | 6.6                  | 66.1        | 3.4        | 60.4        |
|            | Rec. RD <a href="#">Deng &amp; Li (2022)</a>       | 54.6        | 87.9        | <b>92.0</b>          | 83.9        | 3.2        | 6.7                  | 67.2        | 3.5        | 59.2        |
|            | DiAD <a href="#">He et al. (2024b)</a>             | 52.4        | 88.4        | 91.8                 | 83.6        | 2.5        | 5.6                  | 63.4        | 2.9        | 55.4        |
|            | ViTAD <a href="#">Zhang et al. (2023a)</a>         | 50.5        | 87.3        | 91.8                 | 83.7        | 3.2        | 7.1                  | 66.6        | 3.7        | 58.3        |
|            | InvAD <a href="#">Zhang et al. (2024a)</a>         | 60.8        | <b>90.9</b> | <b>92.0</b>          | <b>86.3</b> | 6.5        | <b>13.4</b>          | <b>73.9</b> | <b>7.2</b> | <b>63.1</b> |
|            | InvAD-lite <a href="#">Zhang et al. (2024a)</a>    | 57.0        | 89.6        | 91.8                 | 85.1        | 4.2        | 8.4                  | 69.1        | 4.4        | 60.6        |
|            | MambaAD <a href="#">He et al. (2024a)</a>          | 55.1        | 88.9        | 91.8                 | 84.1        | 3.5        | 6.5                  | 65.9        | 3.4        | 59.3        |
|            | Hybrid UniAD <a href="#">You et al. (2022)</a>     | 42.9        | 83.7        | 91.8                 | 84.4        | 2.9        | 5.4                  | 65.8        | 2.8        | 56.2        |
|            | RD++ <a href="#">Tien et al. (2023)</a>            | 49.2        | 86.2        | <b>92.0</b>          | 84.1        | 3.2        | 6.6                  | 66.7        | 3.4        | 58.0        |
|            | DesTSeg <a href="#">Zhang et al. (2023c)</a>       | 52.4        | 88.7        | 91.8                 | 52.0        | <b>9.9</b> | 5.6                  | 24.8        | 2.9        | 50.4        |
|            | Aug. DRAEM <a href="#">Zavrtanik et al. (2021)</a> | 50.5        | 89.9        | 94.3                 | 43.0        | 0.6        | 1.5                  | 24.4        | 0.7        | 47.8        |
|            | SimpleNet <a href="#">Liu et al. (2023)</a>        | 58.3        | 91.8        | 94.3                 | 92.1        | 2.5        | 5.7                  | 79.3        | 2.9        | 63.2        |
|            | Emb. CFA <a href="#">Lee et al. (2022)</a>         | 54.6        | 90.9        | <b>94.4</b>          | 82.6        | 2.7        | 8.1                  | 59.8        | 4.2        | 59.1        |
|            | CFLOW-AD <a href="#">Gudovskiy et al. (2022)</a>   | 52.0        | 90.1        | 94.3                 | 93.1        | 2.3        | 4.8                  | 80.5        | 2.5        | 62.0        |
|            | PyramidalFlow <a href="#">Lei et al. (2023)</a>    | 49.2        | 88.6        | 94.3                 | 91.1        | 1.7        | 3.8                  | 70.2        | 1.9        | 59.5        |
| 16Cat      | Rec. RD <a href="#">Deng &amp; Li (2022)</a>       | 52.4        | 90.1        | 94.3                 | 93.6        | 3.1        | 6.3                  | 84.8        | 3.3        | 62.9        |
|            | DiAD <a href="#">He et al. (2024b)</a>             | 45.8        | 88.0        | 94.3                 | 93.7        | 3.0        | 5.3                  | 81.8        | 2.7        | 58.8        |
|            | ViTAD <a href="#">Zhang et al. (2023a)</a>         | 57.2        | 92.0        | 94.3                 | 93.8        | 3.2        | 6.3                  | 84.6        | 3.3        | 64.1        |
|            | InvAD <a href="#">Zhang et al. (2024a)</a>         | <b>58.9</b> | 92.1        | 94.3                 | <b>94.5</b> | <b>5.3</b> | <b>11.0</b>          | <b>86.9</b> | <b>5.8</b> | <b>65.6</b> |
|            | InvAD-lite <a href="#">Zhang et al. (2024a)</a>    | 58.5        | <b>92.5</b> | 94.3                 | 94.2        | 3.7        | 7.4                  | 85.6        | 3.9        | 64.7        |
|            | MambaAD <a href="#">He et al. (2024a)</a>          | 54.5        | 91.0        | <b>94.4</b>          | 94.0        | 3.5        | 7.0                  | 84.9        | 3.6        | 63.7        |
|            | Hybrid UniAD <a href="#">You et al. (2022)</a>     | 51.7        | 89.5        | 94.3                 | 93.8        | 2.7        | 5.6                  | 82.4        | 2.9        | 62.3        |
|            | RD++ <a href="#">Tien et al. (2023)</a>            | 53.9        | 90.8        | 94.3                 | 93.4        | 3.4        | 6.3                  | 84.5        | 3.3        | 63.3        |
|            | DesTSeg <a href="#">Zhang et al. (2023c)</a>       | 56.2        | 90.5        | 94.3                 | 52.8        | 1.4        | 3.1                  | 30.6        | 1.6        | 51.2        |

Table A44: Benchmarked results on MAD\_Sim dataset [Zhou et al. \(2024\)](#) by the suggested metrics in [Sec. 3.3](#).

|             | Method                                             | Image-level |             |                      | Pixel-level |             |                      | mAU-PRO     | mIoU-max    | mAD         |
|-------------|----------------------------------------------------|-------------|-------------|----------------------|-------------|-------------|----------------------|-------------|-------------|-------------|
|             |                                                    | mAU-ROC     | mAP         | mF <sub>1</sub> -max | mAU-ROC     | mAP         | mF <sub>1</sub> -max |             |             |             |
| 17Scorpion  | Aug. DRAEM <a href="#">Zavrtanik et al. (2021)</a> | 48.4        | 86.4        | 92.9                 | 51.5        | 0.7         | 1.4                  | 25.6        | 0.7         | 47.9        |
|             | SimpleNet <a href="#">Liu et al. (2023)</a>        | 72.7        | 94.5        | 93.1                 | 88.4        | 4.0         | 6.5                  | 67.9        | 3.4         | 64.2        |
|             | Emb. CFA <a href="#">Lee et al. (2022)</a>         | 68.3        | 92.4        | 93.0                 | 78.9        | 4.1         | 7.0                  | 55.9        | 3.6         | 60.5        |
|             | CFLOW-AD <a href="#">Gudovskiy et al. (2022)</a>   | 59.7        | 91.0        | 92.9                 | 89.6        | 4.6         | 4.9                  | 68.1        | 2.5         | 61.5        |
|             | PyramidalFlow <a href="#">Lei et al. (2023)</a>    | 57.6        | 87.3        | 93.1                 | 83.4        | 1.9         | 5.1                  | 53.1        | 2.6         | 57.6        |
|             | Rec. RD <a href="#">Deng &amp; Li (2022)</a>       | 60.1        | 91.2        | 92.9                 | 91.3        | 4.8         | 7.4                  | 82.3        | 3.8         | 63.9        |
|             | DiAD <a href="#">He et al. (2024b)</a>             | <b>84.8</b> | <b>96.9</b> | <b>93.8</b>          | 87.0        | 1.9         | 3.5                  | 56.5        | 1.8         | 60.6        |
|             | ViTAD <a href="#">Zhang et al. (2023a)</a>         | 60.1        | 90.5        | 93.1                 | 91.2        | 3.3         | 7.7                  | 77.6        | 4.0         | 63.1        |
|             | InvAD <a href="#">Zhang et al. (2024a)</a>         | 81.5        | 96.7        | 93.3                 | <b>93.6</b> | <b>7.2</b>  | <b>10.5</b>          | <b>86.1</b> | <b>5.6</b>  | <b>69.9</b> |
|             | InvAD-lite <a href="#">Zhang et al. (2024a)</a>    | 73.5        | 94.7        | 92.9                 | 93.3        | 6.1         | 8.6                  | 84.8        | 4.5         | 67.6        |
|             | MambaAD <a href="#">He et al. (2024a)</a>          | 73.0        | 94.6        | 93.0                 | 93.0        | 5.5         | 8.2                  | 83.6        | 4.3         | 67.2        |
|             | Hybrid UniAD <a href="#">You et al. (2022)</a>     | 63.5        | 90.9        | 92.9                 | 91.7        | 4.4         | 7.2                  | 79.1        | 3.8         | 64.0        |
|             | RD++ <a href="#">Tien et al. (2023)</a>            | 64.1        | 92.3        | 92.9                 | 91.7        | 5.4         | 7.9                  | 82.4        | 4.1         | 65.0        |
|             | DesTSeg <a href="#">Zhang et al. (2023c)</a>       | 77.8        | 95.9        | 93.1                 | 60.6        | 5.4         | 9.7                  | 44.3        | 5.1         | 59.5        |
|             | Aug. DRAEM <a href="#">Zavrtanik et al. (2021)</a> | 43.9        | 87.1        | 94.1                 | 47.5        | 1.0         | 1.8                  | 26.9        | 0.9         | 47.2        |
|             | SimpleNet <a href="#">Liu et al. (2023)</a>        | 63.3        | 93.6        | 94.1                 | 92.4        | 15.8        | 21.7                 | 81.6        | 12.2        | 68.3        |
| 18Obesobeso | Emb. CFA <a href="#">Lee et al. (2022)</a>         | 62.9        | 93.2        | 94.1                 | 81.8        | 12.6        | 20.0                 | 64.6        | 11.1        | 64.1        |
|             | CFLOW-AD <a href="#">Gudovskiy et al. (2022)</a>   | 59.6        | 91.6        | 94.1                 | 92.5        | 5.8         | 8.8                  | 79.4        | 4.6         | 64.2        |
|             | PyramidalFlow <a href="#">Lei et al. (2023)</a>    | 61.7        | 93.2        | 94.1                 | 91.9        | 4.5         | 8.8                  | 74.7        | 4.6         | 64.0        |
|             | Rec. RD <a href="#">Deng &amp; Li (2022)</a>       | 64.6        | 94.0        | 94.1                 | 93.5        | 11.6        | 20.7                 | 87.8        | 11.5        | 68.8        |
|             | DiAD <a href="#">He et al. (2024b)</a>             | <b>87.5</b> | <b>98.3</b> | <b>94.4</b>          | <b>95.1</b> | 10.2        | 17.7                 | 82.9        | 9.7         | 69.4        |
|             | ViTAD <a href="#">Zhang et al. (2023a)</a>         | 67.5        | 94.4        | 94.1                 | 94.3        | <b>18.2</b> | 24.7                 | 88.3        | 14.1        | 70.9        |
|             | InvAD <a href="#">Zhang et al. (2024a)</a>         | 83.5        | 97.6        | 94.2                 | 94.8        | 16.6        | <b>26.3</b>          | <b>90.8</b> | <b>15.1</b> | <b>74.4</b> |
|             | InvAD-lite <a href="#">Zhang et al. (2024a)</a>    | 70.3        | 95.3        | 94.2                 | 93.7        | 12.9        | 21.2                 | 88.1        | 11.8        | 70.3        |
|             | MambaAD <a href="#">He et al. (2024a)</a>          | 69.6        | 95.0        | 94.2                 | 93.0        | 10.9        | 20.2                 | 86.4        | 11.3        | 69.4        |
|             | Hybrid UniAD <a href="#">You et al. (2022)</a>     | 64.9        | 93.4        | 94.1                 | 92.2        | 6.9         | 12.9                 | 82.4        | 6.9         | 66.4        |
|             | RD++ <a href="#">Tien et al. (2023)</a>            | 67.7        | 94.0        | <b>94.4</b>          | 93.2        | 9.1         | 17.4                 | 86.5        | 9.5         | 68.5        |
|             | DesTSeg <a href="#">Zhang et al. (2023c)</a>       | 63.1        | 93.1        | 94.2                 | 61.1        | 16.2        | 22.4                 | 45.0        | 12.6        | 59.8        |
|             | Aug. DRAEM <a href="#">Zavrtanik et al. (2021)</a> | 54.1        | 89.3        | 93.3                 | 49.3        | 0.8         | 1.3                  | 23.0        | 0.7         | 48.7        |
|             | SimpleNet <a href="#">Liu et al. (2023)</a>        | 63.0        | 92.8        | 93.5                 | 88.4        | 7.0         | 12.8                 | 68.6        | 6.8         | 63.7        |
|             | Emb. CFA <a href="#">Lee et al. (2022)</a>         | 63.0        | 92.4        | 93.5                 | 80.7        | 5.5         | 12.1                 | 57.5        | 6.4         | 61.0        |
|             | CFLOW-AD <a href="#">Gudovskiy et al. (2022)</a>   | 60.9        | 91.3        | 93.3                 | 88.9        | 3.7         | 6.4                  | 64.6        | 3.3         | 61.4        |
| 19Bear      | PyramidalFlow <a href="#">Lei et al. (2023)</a>    | 52.6        | 89.6        | 93.6                 | 87.2        | 3.6         | 6.3                  | 61.0        | 3.3         | 59.1        |
|             | Rec. RD <a href="#">Deng &amp; Li (2022)</a>       | 62.9        | 92.2        | 93.6                 | 90.8        | 6.2         | 10.8                 | 76.8        | 5.7         | 64.5        |
|             | DiAD <a href="#">He et al. (2024b)</a>             | 59.1        | 92.9        | 93.3                 | 89.4        | 4.2         | 10.5                 | 62.6        | 5.5         | 58.8        |
|             | ViTAD <a href="#">Zhang et al. (2023a)</a>         | 60.9        | 91.2        | 93.5                 | 91.1        | 5.5         | 11.5                 | 75.1        | 6.1         | 63.8        |
|             | InvAD <a href="#">Zhang et al. (2024a)</a>         | <b>73.9</b> | <b>95.4</b> | 93.3                 | <b>92.5</b> | <b>13.8</b> | <b>21.7</b>          | <b>82.0</b> | <b>12.2</b> | <b>70.0</b> |
|             | InvAD-lite <a href="#">Zhang et al. (2024a)</a>    | 67.7        | 93.2        | 93.3                 | 92.2        | 11.3        | 18.1                 | 78.9        | 10.0        | 67.4        |
|             | MambaAD <a href="#">He et al. (2024a)</a>          | 64.2        | 92.9        | 93.5                 | 91.2        | 7.9         | 13.4                 | 76.1        | 7.2         | 65.3        |
|             | Hybrid UniAD <a href="#">You et al. (2022)</a>     | 56.8        | 90.6        | 93.3                 | 90.0        | 4.2         | 7.9                  | 77.2        | 4.1         | 62.5        |
|             | RD++ <a href="#">Tien et al. (2023)</a>            | 65.3        | 93.0        | 93.5                 | 90.8        | 7.7         | 11.8                 | 76.9        | 6.3         | 65.4        |
|             | DesTSeg <a href="#">Zhang et al. (2023c)</a>       | 66.8        | 93.5        | <b>93.7</b>          | 58.5        | 9.4         | 13.7                 | 43.7        | 7.3         | 58.0        |
|             | Aug. DRAEM <a href="#">Zavrtanik et al. (2021)</a> | 44.7        | 84.1        | 92.7                 | 47.9        | 0.5         | 0.9                  | 20.7        | 0.4         | 45.7        |
|             | SimpleNet <a href="#">Liu et al. (2023)</a>        | 54.6        | 89.8        | 92.9                 | 83.1        | 2.6         | 4.9                  | 54.4        | 2.5         | 57.7        |
|             | Emb. CFA <a href="#">Lee et al. (2022)</a>         | 56.3        | 90.2        | 92.9                 | 71.2        | 3.0         | 6.9                  | 51.5        | 3.6         | 56.5        |
|             | CFLOW-AD <a href="#">Gudovskiy et al. (2022)</a>   | 57.5        | 90.1        | 92.7                 | 85.2        | 1.9         | 4.5                  | 57.1        | 2.3         | 58.6        |
|             | PyramidalFlow <a href="#">Lei et al. (2023)</a>    | 56.0        | 89.4        | 92.9                 | 81.1        | 1.5         | 3.2                  | 53.1        | 1.6         | 57.1        |
|             | Rec. RD <a href="#">Deng &amp; Li (2022)</a>       | 54.0        | 89.6        | <b>93.0</b>          | 86.8        | 3.6         | 6.3                  | 66.5        | 3.3         | 59.8        |
| 20Puppy     | DiAD <a href="#">He et al. (2024b)</a>             | 48.7        | 88.8        | 92.7                 | 83.4        | 1.4         | 2.7                  | 51.9        | 1.4         | 52.8        |
|             | ViTAD <a href="#">Zhang et al. (2023a)</a>         | 52.0        | 87.4        | <b>93.0</b>          | 87.6        | 2.4         | 4.9                  | 66.3        | 2.5         | 58.9        |
|             | InvAD <a href="#">Zhang et al. (2024a)</a>         | 62.9        | 92.5        | 92.9                 | <b>89.3</b> | 5.9         | <b>11.0</b>          | <b>73.3</b> | <b>5.8</b>  | <b>63.8</b> |
|             | InvAD-lite <a href="#">Zhang et al. (2024a)</a>    | 54.0        | 90.0        | <b>93.0</b>          | 87.5        | 3.5         | 6.2                  | 68.2        | 3.2         | 60.2        |
|             | MambaAD <a href="#">He et al. (2024a)</a>          | 49.2        | 87.7        | 92.7                 | 86.6        | 2.6         | 5.3                  | 64.8        | 2.7         | 58.2        |
|             | Hybrid UniAD <a href="#">You et al. (2022)</a>     | 55.6        | 89.8        | 92.7                 | 86.5        | 3.4         | 7.9                  | 68.4        | 4.1         | 60.5        |
|             | RD++ <a href="#">Tien et al. (2023)</a>            | 59.0        | 91.5        | 92.9                 | 87.1        | 4.1         | 8.1                  | 66.8        | 4.2         | 61.3        |
|             | DesTSeg <a href="#">Zhang et al. (2023c)</a>       | <b>64.6</b> | <b>93.0</b> | 92.9                 | 53.7        | <b>13.3</b> | 9.5                  | 32.9        | 5.0         | 55.4        |
|             | Aug. DRAEM <a href="#">Zavrtanik et al. (2021)</a> | 49.5        | 88.3        | 93.8                 | 48.4        | 0.8         | 1.5                  | 24.5        | 0.7         | 48.0        |
|             | SimpleNet <a href="#">Liu et al. (2023)</a>        | 58.9        | 91.7        | 93.8                 | 85.5        | 4.2         | 8.0                  | 63.9        | 4.2         | 60.9        |
|             | Emb. CFA <a href="#">Lee et al. (2022)</a>         | 56.4        | 91.1        | 93.8                 | 76.6        | 4.2         | 8.7                  | 54.7        | 4.6         | 58.2        |
|             | CFLOW-AD <a href="#">Gudovskiy et al. (2022)</a>   | 55.8        | 90.6        | 93.8                 | 86.9        | 3.4         | 5.2                  | 63.9        | 2.7         | 60.0        |
|             | PyramidalFlow <a href="#">Lei et al. (2023)</a>    | 50.8        | 88.9        | 93.8                 | 82.0        | 2.3         | 4.8                  | 58.8        | 2.5         | 57.4        |
|             | Rec. RD <a href="#">Deng &amp; Li (2022)</a>       | 58.6        | 91.7        | 93.8                 | 88.3        | 4.7         | 8.5                  | 74.2        | 4.5         | 62.6        |
|             | DiAD <a href="#">He et al. (2024b)</a>             | 65.7        | 93.3        | <b>94.1</b>          | 87.2        | 3.9         | 7.9                  | 60.1        | 4.2         | 58.9        |
|             | ViTAD <a href="#">Zhang et al. (2023a)</a>         | 58.5        | 91.5        | 93.8                 | 89.0        | 5.0         | 9.5                  | 73.5        | 5.0         | 62.8        |
| Avg         | InvAD <a href="#">Zhang et al. (2024a)</a>         | <b>70.4</b> | <b>94.6</b> | 93.9                 | <b>90.5</b> | <b>8.8</b>  | <b>15.7</b>          | <b>79.3</b> | <b>8.6</b>  | <b>67.4</b> |
|             | InvAD-lite <a href="#">Zhang et al. (2024a)</a>    | 64.7        | 93.3        | 93.8                 | 89.4        | 6.4         | 11.2                 | 76.1        | 6.0         | 64.9        |
|             | MambaAD <a href="#">He et al. (2024a)</a>          | 63.0        | 92.9        | 93.8                 | 88.3        | 5.2         | 9.4                  | 73.3        | 5.0         | 63.6        |
|             | Hybrid UniAD <a href="#">You et al. (2022)</a>     | 54.2        | 90.0        | 93.8                 | 88.1        | 3.5         | 6.8                  | 71.8        | 3.5         | 60.9        |
|             | RD++ <a href="#">Tien et al. (2023)</a>            | 59.3        | 91.7        | 93.8                 | 88.3        | 4.6         | 8.5                  | 73.8        | 4.4         | 62.7        |
|             | DesTSeg <a href="#">Zhang et al. (2023c)</a>       | 57.9        | 91.8        | 93.8                 | 54.5        | 6.2         | 7.7                  | 35.8        | 4.1         | 53.6        |

## K DETAILED QUANTITATIVE RESULTS ON UNI-MEDICAL DATASET UNDER 100 EPOCHS

Table A45: Benchmarked results on Uni-Medical dataset [Zhang et al. \(2023a\)](#) by the suggested metrics in Sec. 3.3.

|         | Method | Image-level                                      |             |                      | Pixel-level |             |                      | mAU-PRO     | mIoU-max    | mAD         |
|---------|--------|--------------------------------------------------|-------------|----------------------|-------------|-------------|----------------------|-------------|-------------|-------------|
|         |        | mAU-ROC                                          | mAP         | mF <sub>1</sub> -max | mAU-ROC     | mAP         | mF <sub>1</sub> -max |             |             |             |
| brain   | Aug.   | DRAEM <a href="#">Zavrtanik et al. (2021)</a>    | 47.1        | 82.8                 | 90.6        | 33.8        | 2.2                  | 6.1         | 7.9         | 43.0        |
|         |        | SimpleNet <a href="#">Liu et al. (2023)</a>      | 84.8        | 96.3                 | 91.0        | 94.5        | 43.4                 | 43.9        | 71.4        | 77.0        |
|         |        | CFA <a href="#">Lee et al. (2022)</a>            | 82.5        | 95.9                 | 90.6        | 75.6        | 33.0                 | 39.0        | 36.5        | 67.8        |
|         | Emb.   | CFLOW-AD <a href="#">Gudovskiy et al. (2022)</a> | 85.7        | 96.2                 | 91.9        | 94.5        | 56.6                 | 17.2        | 73.8        | 75.9        |
|         |        | PyramidalFlow <a href="#">Lei et al. (2023)</a>  | 62.4        | 86.1                 | 90.9        | 85.7        | 10.4                 | 18.0        | 50.5        | 60.5        |
|         |        | RD <a href="#">Deng &amp; Li (2022)</a>          | 83.9        | 94.6                 | 91.9        | 96.5        | 45.6                 | 48.9        | 82.8        | 79.3        |
|         | Rec.   | DiAD <a href="#">He et al. (2024b)</a>           | 93.2        | 97.7                 | <b>95.2</b> | 94.9        | 35.2                 | 39.8        | 79.5        | 76.5        |
|         |        | ViTAD <a href="#">Zhang et al. (2023a)</a>       | 89.4        | 97.3                 | 93.0        | 97.7        | <b>61.8</b>          | 58.8        | 84.0        | 41.7        |
|         |        | InvAD <a href="#">Zhang et al. (2024a)</a>       | 90.8        | 97.7                 | 93.2        | 97.7        | 59.1                 | 58.3        | 86.2        | 41.2        |
|         |        | InvAD-lite <a href="#">Zhang et al. (2024a)</a>  | 84.9        | 95.9                 | 91.8        | 96.5        | 46.2                 | 49.2        | 82.5        | 32.6        |
|         |        | MambaAD <a href="#">He et al. (2024a)</a>        | <b>93.7</b> | <b>98.5</b>          | 94.2        | <b>97.9</b> | 60.8                 | <b>61.5</b> | <b>87.5</b> | <b>44.4</b> |
|         | Hybrid | UniAD <a href="#">You et al. (2022)</a>          | 90.2        | 97.7                 | 92.6        | 97.4        | 56.2                 | 55.6        | 82.9        | 38.5        |
|         |        | RD++ <a href="#">Tien et al. (2023)</a>          | 84.8        | 95.5                 | 91.8        | 96.9        | 48.5                 | 51.5        | 84.2        | 34.6        |
|         |        | DesTSeg <a href="#">Zhang et al. (2023c)</a>     | 87.1        | 95.9                 | 92.2        | 70.2        | 52.2                 | 42.7        | 33.9        | 27.2        |
| liver   | Aug.   | DRAEM <a href="#">Zavrtanik et al. (2021)</a>    | 53.1        | 49.7                 | 61.6        | 20.0        | 0.4                  | 1.5         | 10.2        | 0.7         |
|         |        | SimpleNet <a href="#">Liu et al. (2023)</a>      | 60.5        | 50.6                 | 62.2        | 94.2        | 6.0                  | 11.6        | 81.5        | 6.2         |
|         |        | CFA <a href="#">Lee et al. (2022)</a>            | 52.9        | 48.1                 | 61.3        | 88.0        | 4.7                  | 11.1        | 60.5        | 5.9         |
|         | Emb.   | CFLOW-AD <a href="#">Gudovskiy et al. (2022)</a> | 63.9        | <b>56.1</b>          | 63.0        | 95.9        | 2.9                  | 5.6         | 87.4        | 2.9         |
|         |        | PyramidalFlow <a href="#">Lei et al. (2023)</a>  | 47.2        | 43.2                 | 60.9        | 75.0        | 3.3                  | 11.5        | 9.0         | 6.1         |
|         |        | RD <a href="#">Deng &amp; Li (2022)</a>          | 55.5        | 45.8                 | 64.4        | 96.6        | 5.5                  | 10.4        | 91.1        | 5.5         |
|         | Rec.   | DiAD <a href="#">He et al. (2024b)</a>           | 56.5        | 51.7                 | 62.0        | 96.4        | 5.5                  | 10.6        | 89.6        | 5.6         |
|         |        | ViTAD <a href="#">Zhang et al. (2023a)</a>       | 63.9        | 54.9                 | 65.1        | <b>97.9</b> | 13.2                 | <b>21.4</b> | 92.6        | <b>12.0</b> |
|         |        | InvAD <a href="#">Zhang et al. (2024a)</a>       | <b>64.2</b> | 52.8                 | <b>65.9</b> | 97.0        | 7.8                  | 14.5        | <b>92.9</b> | 7.8         |
|         |        | InvAD-lite <a href="#">Zhang et al. (2024a)</a>  | 57.0        | 46.6                 | 63.8        | 96.4        | 5.3                  | 9.8         | 90.6        | 5.1         |
|         |        | MambaAD <a href="#">He et al. (2024a)</a>        | <b>64.2</b> | 54.6                 | 64.5        | 97.0        | 10.0                 | 17.4        | 92.6        | 9.5         |
|         | Hybrid | UniAD <a href="#">You et al. (2022)</a>          | 60.3        | 48.3                 | 63.1        | 97.1        | 7.9                  | 14.0        | 92.7        | 7.5         |
|         |        | RD++ <a href="#">Tien et al. (2023)</a>          | 55.6        | 44.8                 | 64.4        | 96.6        | 5.5                  | 10.3        | 91.5        | 5.4         |
|         |        | DesTSeg <a href="#">Zhang et al. (2023c)</a>     | 58.5        | 47.8                 | 61.4        | 57.6        | <b>13.8</b>          | 15.6        | 31.4        | 8.5         |
| retinal | Aug.   | DRAEM <a href="#">Zavrtanik et al. (2021)</a>    | 54.7        | 49.4                 | 59.7        | 47.8        | 3.5                  | 9.6         | 13.3        | 5.1         |
|         |        | SimpleNet <a href="#">Liu et al. (2023)</a>      | 87.0        | 86.2                 | 76.8        | 94.2        | 53.9                 | 52.5        | 78.2        | 35.6        |
|         |        | CFA <a href="#">Lee et al. (2022)</a>            | 77.7        | 75.8                 | 67.4        | 71.4        | 20.7                 | 24.5        | 37.3        | 14.0        |
|         | Emb.   | CFLOW-AD <a href="#">Gudovskiy et al. (2022)</a> | 88.0        | 86.5                 | 76.8        | 95.8        | 61.6                 | 57.9        | 84.1        | 40.7        |
|         |        | PyramidalFlow <a href="#">Lei et al. (2023)</a>  | 52.3        | 42.7                 | 59.7        | 75.9        | 11.4                 | 21.8        | 43.2        | 12.2        |
|         |        | RD <a href="#">Deng &amp; Li (2022)</a>          | 89.0        | 86.8                 | 78.2        | 96.4        | 65.1                 | 60.1        | 86.5        | 43.0        |
|         | Rec.   | DiAD <a href="#">He et al. (2024b)</a>           | 86.6        | 82.0                 | 76.0        | 96.1        | 61.8                 | 56.2        | 83.8        | 39.0        |
|         |        | ViTAD <a href="#">Zhang et al. (2023a)</a>       | 92.1        | 90.0                 | 81.9        | 95.6        | 69.8                 | 64.2        | 83.5        | 47.3        |
|         |        | InvAD <a href="#">Zhang et al. (2024a)</a>       | 92.2        | <b>91.0</b>          | 82.4        | <b>97.1</b> | <b>71.9</b>          | <b>65.5</b> | <b>88.7</b> | <b>48.7</b> |
|         |        | InvAD-lite <a href="#">Zhang et al. (2024a)</a>  | 91.7        | 89.2                 | 81.8        | 95.7        | 65.3                 | 59.0        | 84.4        | 41.9        |
|         |        | MambaAD <a href="#">He et al. (2024a)</a>        | <b>93.8</b> | 89.1                 | <b>86.9</b> | 95.5        | 66.4                 | 63.5        | 84.6        | 46.6        |
|         | Hybrid | UniAD <a href="#">You et al. (2022)</a>          | 86.3        | 82.4                 | 75.8        | 95.3        | 53.8                 | 53.7        | 82.5        | 36.7        |
|         |        | RD++ <a href="#">Tien et al. (2023)</a>          | 91.2        | 89.2                 | 81.3        | 96.7        | 70.4                 | 64.9        | 87.6        | 48.1        |
|         |        | DesTSeg <a href="#">Zhang et al. (2023c)</a>     | 90.0        | 87.4                 | 81.0        | 69.2        | 59.0                 | 43.7        | 40.4        | 27.9        |
| Avg     | Aug.   | DRAEM <a href="#">Zavrtanik et al. (2021)</a>    | 51.6        | 60.6                 | 70.6        | 33.8        | 2.0                  | 5.7         | 10.5        | 3.0         |
|         |        | SimpleNet <a href="#">Liu et al. (2023)</a>      | 77.5        | 77.7                 | 76.7        | 94.3        | 34.4                 | 36.0        | 77.0        | 23.3        |
|         |        | CFA <a href="#">Lee et al. (2022)</a>            | 71.0        | 73.3                 | 73.1        | 78.3        | 19.5                 | 24.9        | 44.7        | 14.7        |
|         | Emb.   | CFLOW-AD <a href="#">Gudovskiy et al. (2022)</a> | 79.2        | 79.6                 | 77.2        | 95.4        | 40.4                 | 26.9        | 81.8        | 17.7        |
|         |        | PyramidalFlow <a href="#">Lei et al. (2023)</a>  | 53.9        | 57.3                 | 70.5        | 78.8        | 8.4                  | 17.1        | 34.2        | 9.4         |
|         |        | RD <a href="#">Deng &amp; Li (2022)</a>          | 76.1        | 75.7                 | 78.2        | 96.5        | 38.8                 | 39.8        | 86.8        | 26.9        |
|         | Rec.   | DiAD <a href="#">He et al. (2024b)</a>           | 78.8        | 77.2                 | 77.7        | 95.8        | 34.2                 | 35.5        | 84.3        | 23.2        |
|         |        | ViTAD <a href="#">Zhang et al. (2023a)</a>       | 81.8        | 80.7                 | 80.0        | 97.1        | <b>48.3</b>          | <b>48.2</b> | 86.7        | <b>33.7</b> |
|         |        | InvAD <a href="#">Zhang et al. (2024a)</a>       | 82.4        | 80.5                 | 80.5        | <b>97.3</b> | 46.2                 | 46.1        | <b>89.3</b> | 32.6        |
|         |        | InvAD-lite <a href="#">Zhang et al. (2024a)</a>  | 77.9        | 77.3                 | 79.1        | 96.2        | 39.0                 | 39.3        | 85.8        | 26.5        |
|         |        | MambaAD <a href="#">He et al. (2024a)</a>        | <b>83.9</b> | <b>80.8</b>          | <b>81.9</b> | 96.8        | 45.8                 | 47.5        | 88.2        | 33.5        |
|         | Hybrid | UniAD <a href="#">You et al. (2022)</a>          | 79.0        | 76.1                 | 77.1        | 96.6        | 39.3                 | 41.1        | 86.0        | 27.6        |
|         |        | RD++ <a href="#">Tien et al. (2023)</a>          | 77.2        | 76.5                 | 79.2        | 96.7        | 41.5                 | 42.2        | 87.8        | 29.4        |
|         |        | DesTSeg <a href="#">Zhang et al. (2023c)</a>     | 78.5        | 77.0                 | 78.2        | 65.7        | 41.7                 | 34.0        | 35.3        | 21.2        |

## L DETAILED QUANTITATIVE RESULTS ON REAL-IAD DATASET UNDER 100 EPOCHS

Table A46: Benchmarked results on Real-IAD dataset [Wang et al. \(2024\)](#) by the suggested metrics in [Sec. 3.3](#).

|                | Method                                             | Image-level |             |                      | Pixel-level |             |                      | mAU-PRO     | mIoU-max    | mAD         |
|----------------|----------------------------------------------------|-------------|-------------|----------------------|-------------|-------------|----------------------|-------------|-------------|-------------|
|                |                                                    | mAU-ROC     | mAP         | mF <sub>1</sub> -max | mAU-ROC     | mAP         | mF <sub>1</sub> -max |             |             |             |
| audiojack      | Aug. DRAEM <a href="#">Zavrtanik et al. (2021)</a> | 53.0        | 36.9        | 51.4                 | 42.8        | 0.1         | 0.3                  | 13.7        | 0.2         | 30.7        |
|                | SimpleNet <a href="#">Liu et al. (2023)</a>        | 51.4        | 36.3        | 50.9                 | 66.0        | 0.2         | 0.9                  | 37.6        | 0.5         | 36.2        |
|                | Emb. CFA <a href="#">Lee et al. (2022)</a>         | 57.3        | 41.9        | 52.1                 | 86.5        | 0.5         | 1.6                  | 57.1        | 0.8         | 43.4        |
|                | CFLOW-AD <a href="#">Gudovskiy et al. (2022)</a>   | 77.4        | 70.8        | 60.9                 | 95.4        | 16.4        | 15.4                 | 73.2        | 8.3         | 59.9        |
|                | PyramidalFlow <a href="#">Lei et al. (2023)</a>    | 51.7        | 34.9        | 50.7                 | 81.7        | 0.2         | 0.4                  | 40.7        | 0.2         | 38.3        |
|                | Rec. RD <a href="#">Deng &amp; Li (2022)</a>       | 76.0        | 62.8        | 60.6                 | 96.7        | 13.1        | 22.1                 | 80.6        | 12.4        | 59.8        |
|                | DiAD <a href="#">He et al. (2024b)</a>             | 76.5        | 54.3        | 65.7                 | 91.6        | 1.0         | 3.9                  | 63.3        | 2.0         | 50.9        |
|                | ViTAD <a href="#">Zhang et al. (2023a)</a>         | 80.6        | 72.8        | 63.5                 | 96.8        | 21.3        | 31.5                 | 79.5        | 18.7        | 64.8        |
|                | InvAD <a href="#">Zhang et al. (2024a)</a>         | <b>85.2</b> | <b>80.7</b> | <b>69.3</b>          | <b>98.5</b> | <b>33.9</b> | <b>43.8</b>          | <b>89.6</b> | <b>28.0</b> | <b>72.4</b> |
|                | InvAD-lite <a href="#">Zhang et al. (2024a)</a>    | 84.3        | 78.7        | 67.8                 | 98.1        | <u>32.4</u> | 40.8                 | 87.0        | 25.6        | 70.8        |
|                | MambaAD <a href="#">He et al. (2024a)</a>          | 84.9        | <u>77.7</u> | <u>68.2</u>          | 98.0        | 22.2        | 30.4                 | 86.2        | 17.9        | 68.1        |
|                | Hybrid UniAD <a href="#">You et al. (2022)</a>     | 81.7        | 76.2        | 65.4                 | 97.6        | 20.7        | 31.1                 | 84.1        | 18.4        | 66.4        |
|                | RD++ <a href="#">Tien et al. (2023)</a>            | 76.0        | 60.0        | 61.5                 | 96.6        | 10.6        | 20.1                 | 80.4        | 11.2        | 58.9        |
|                | DesTSeg <a href="#">Zhang et al. (2023c)</a>       | 81.6        | 74.7        | 66.5                 | 88.3        | <b>44.9</b> | <b>50.7</b>          | 64.5        | <b>34.0</b> | <u>68.2</u> |
|                | Aug. DRAEM <a href="#">Zavrtanik et al. (2021)</a> | 46.9        | 40.9        | 60.2                 | 35.2        | 0.0         | 0.1                  | 9.7         | 0.0         | 30.3        |
|                | SimpleNet <a href="#">Liu et al. (2023)</a>        | 47.4        | 41.0        | 60.2                 | 80.1        | 0.5         | 3.7                  | 35.8        | 1.9         | 39.8        |
| bottle_cap     | Emb. CFA <a href="#">Lee et al. (2022)</a>         | 55.7        | 49.7        | 60.2                 | 85.2        | 0.5         | 2.4                  | 57.0        | 1.2         | 45.7        |
|                | CFLOW-AD <a href="#">Gudovskiy et al. (2022)</a>   | 80.0        | 78.3        | 71.7                 | 98.8        | 13.6        | 22.6                 | 91.9        | 12.7        | 66.7        |
|                | PyramidalFlow <a href="#">Lei et al. (2023)</a>    | 55.4        | 46.7        | 60.3                 | 93.2        | 0.7         | 2.6                  | 72.0        | 1.3         | 48.1        |
|                | Rec. RD <a href="#">Deng &amp; Li (2022)</a>       | 89.6        | 86.3        | 81.2                 | <u>99.4</u> | 18.6        | 28.6                 | 96.3        | 16.7        | 73.2        |
|                | DiAD <a href="#">He et al. (2024b)</a>             | 91.6        | 94.0        | <b>87.9</b>          | 94.6        | 4.9         | 11.4                 | 73.0        | 6.0         | 65.3        |
|                | ViTAD <a href="#">Zhang et al. (2023a)</a>         | 82.2        | 78.8        | 74.8                 | 98.7        | 16.7        | 27.5                 | 91.5        | 16.0        | 68.6        |
|                | InvAD <a href="#">Zhang et al. (2024a)</a>         | <b>95.5</b> | <b>94.9</b> | 85.9                 | 99.6        | <u>24.9</u> | <b>33.9</b>          | 97.2        | <b>20.4</b> | <b>78.0</b> |
|                | InvAD-lite <a href="#">Zhang et al. (2024a)</a>    | 92.6        | 91.2        | 81.9                 | 99.6        | 21.2        | 28.5                 | <b>97.5</b> | 16.6        | <u>75.1</u> |
|                | MambaAD <a href="#">He et al. (2024a)</a>          | <u>93.2</u> | <u>92.6</u> | <u>82.7</u>          | <b>99.7</b> | <b>29.9</b> | <u>33.8</u>          | 97.4        | <u>20.3</u> | <u>77.3</u> |
|                | Hybrid UniAD <a href="#">You et al. (2022)</a>     | 91.6        | 90.6        | 80.4                 | 99.4        | 21.0        | 30.5                 | 95.8        | 18.0        | 74.6        |
|                | RD++ <a href="#">Tien et al. (2023)</a>            | 89.7        | 86.7        | 81.5                 | 99.3        | 18.9        | 30.4                 | 95.6        | 17.9        | 73.5        |
|                | DesTSeg <a href="#">Zhang et al. (2023c)</a>       | 75.5        | 74.5        | 65.9                 | 71.1        | <u>27.3</u> | <u>31.7</u>          | 43.2        | 18.9        | 57.6        |
|                | Aug. DRAEM <a href="#">Zavrtanik et al. (2021)</a> | 34.4        | 46.9        | 72.4                 | 51.8        | 0.5         | 0.9                  | 17.8        | 0.4         | 34.5        |
|                | SimpleNet <a href="#">Liu et al. (2023)</a>        | 60.4        | 68.6        | 72.4                 | 78.0        | 9.4         | 15.4                 | 38.3        | 8.4         | 51.2        |
|                | Emb. CFA <a href="#">Lee et al. (2022)</a>         | 53.2        | 57.9        | 72.5                 | 84.3        | 1.6         | 3.2                  | 54.8        | 1.6         | 48.6        |
|                | CFLOW-AD <a href="#">Gudovskiy et al. (2022)</a>   | 66.0        | 75.1        | 72.7                 | 95.6        | 29.2        | 25.8                 | 74.8        | 14.8        | 63.8        |
| button_battery | PyramidalFlow <a href="#">Lei et al. (2023)</a>    | 52.5        | 56.4        | 72.5                 | 50.2        | 17.5        | 0.8                  | 15.0        | 0.4         | 40.7        |
|                | Rec. RD <a href="#">Deng &amp; Li (2022)</a>       | 74.7        | 79.7        | 75.9                 | 97.7        | 34.5        | 39.4                 | 86.4        | 24.5        | 70.6        |
|                | DiAD <a href="#">He et al. (2024b)</a>             | 80.5        | 71.3        | 70.6                 | 84.1        | 1.4         | 5.3                  | 66.9        | 2.7         | 54.3        |
|                | ViTAD <a href="#">Zhang et al. (2023a)</a>         | 77.0        | 82.2        | 77.6                 | <u>98.3</u> | 49.1        | 49.6                 | 82.7        | 32.9        | 74.4        |
|                | InvAD <a href="#">Zhang et al. (2024a)</a>         | <b>90.4</b> | <b>92.5</b> | <b>84.6</b>          | <b>99.1</b> | <b>57.2</b> | <b>56.1</b>          | <b>92.6</b> | <b>39.0</b> | <b>82.7</b> |
|                | InvAD-lite <a href="#">Zhang et al. (2024a)</a>    | 82.0        | 86.9        | 78.4                 | 98.5        | <u>51.1</u> | <u>52.4</u>          | 89.0        | 35.5        | <u>77.6</u> |
|                | MambaAD <a href="#">He et al. (2024a)</a>          | 82.8        | 87.4        | 79.2                 | 98.3        | 48.6        | 49.6                 | 88.1        | 33.0        | <u>77.1</u> |
|                | Hybrid UniAD <a href="#">You et al. (2022)</a>     | 72.8        | 79.8        | 74.6                 | 96.5        | 29.5        | 33.7                 | 78.7        | 20.3        | 67.7        |
|                | RD++ <a href="#">Tien et al. (2023)</a>            | 76.5        | 82.2        | 75.8                 | 97.9        | 38.4        | 42.7                 | 87.1        | 27.2        | 72.3        |
|                | DesTSeg <a href="#">Zhang et al. (2023c)</a>       | 84.6        | 87.8        | <u>81.2</u>          | 92.2        | <u>55.7</u> | <u>53.7</u>          | 60.4        | <u>36.7</u> | 75.0        |
|                | Aug. DRAEM <a href="#">Zavrtanik et al. (2021)</a> | 48.1        | 57.5        | 72.9                 | 54.9        | 0.1         | 0.3                  | 21.0        | 0.1         | 39.3        |
|                | SimpleNet <a href="#">Liu et al. (2023)</a>        | 52.4        | 59.6        | 72.9                 | 65.5        | 0.3         | 1.8                  | 39.0        | 0.9         | 44.1        |
|                | Emb. CFA <a href="#">Lee et al. (2022)</a>         | 55.3        | 62.5        | 73.3                 | 72.8        | 0.4         | 2.7                  | 40.0        | 1.4         | 46.3        |
|                | CFLOW-AD <a href="#">Gudovskiy et al. (2022)</a>   | 63.7        | 72.7        | 72.9                 | 87.6        | 3.5         | 5.9                  | 60.3        | 3.0         | 54.5        |
|                | PyramidalFlow <a href="#">Lei et al. (2023)</a>    | 55.7        | 63.8        | 73.0                 | 77.2        | 0.4         | 1.9                  | 33.2        | 1.0         | 46.2        |
|                | Rec. RD <a href="#">Deng &amp; Li (2022)</a>       | 80.0        | 84.0        | 78.2                 | 96.5        | 12.3        | <u>21.9</u>          | 89.4        | <u>12.3</u> | 67.9        |
| end_cap        | DiAD <a href="#">He et al. (2024b)</a>             | <b>85.1</b> | 83.4        | <b>84.8</b>          | 81.3        | 2.0         | 6.9                  | 38.2        | 3.6         | 54.5        |
|                | ViTAD <a href="#">Zhang et al. (2023a)</a>         | 72.6        | 77.1        | 75.2                 | 93.8        | 5.7         | 12.2                 | 75.9        | 6.5         | 60.9        |
|                | InvAD <a href="#">Zhang et al. (2024a)</a>         | 84.1        | <b>87.7</b> | <u>80.3</u>          | <b>98.0</b> | <b>14.7</b> | <b>22.7</b>          | <b>93.5</b> | <b>12.8</b> | <b>70.6</b> |
|                | InvAD-lite <a href="#">Zhang et al. (2024a)</a>    | 79.8        | 84.2        | <u>78.3</u>          | 97.4        | 13.5        | 21.0                 | 91.5        | 11.8        | 68.3        |
|                | MambaAD <a href="#">He et al. (2024a)</a>          | 78.6        | 83.1        | <u>77.4</u>          | 97.2        | 12.2        | 19.5                 | 90.3        | 10.8        | 67.2        |
|                | Hybrid UniAD <a href="#">You et al. (2022)</a>     | 80.9        | <u>86.3</u> | 77.8                 | 95.5        | 9.5         | 17.7                 | 86.4        | 9.7         | 67.0        |
|                | RD++ <a href="#">Tien et al. (2023)</a>            | 79.7        | 84.3        | 77.8                 | 96.8        | <u>12.6</u> | 22.6                 | 90.4        | <u>12.7</u> | <u>68.1</u> |
|                | DesTSeg <a href="#">Zhang et al. (2023c)</a>       | 72.7        | 76.8        | 74.9                 | 75.3        | 10.3        | 18.7                 | 53.2        | 10.3        | 57.1        |

Table A47: Benchmarked results on Real-IAD dataset Wang et al. (2024) by the suggested metrics in Sec. 3.3.

|           | Method                           | Image-level |             |                      | Pixel-level |             |                      | mAU-PRO     | mIoU-max    | mAD         |
|-----------|----------------------------------|-------------|-------------|----------------------|-------------|-------------|----------------------|-------------|-------------|-------------|
|           |                                  | mAU-ROC     | mAP         | mF <sub>1</sub> -max | mAU-ROC     | mAP         | mF <sub>1</sub> -max |             |             |             |
| eraser    | Aug.                             |             |             |                      |             |             |                      |             |             |             |
|           | DRAEM Zavrtanik et al. (2021)    | 53.8        | 42.8        | 55.9                 | 42.6        | 0.1         | 0.2                  | 11.2        | 0.1         | 32.2        |
|           | SimpleNet Liu et al. (2023)      | 53.4        | 46.3        | 55.8                 | 87.6        | 3.8         | 8.7                  | 59.8        | 4.6         | 45.9        |
|           | CFA Lee et al. (2022)            | 51.2        | 43.0        | 55.9                 | 78.5        | 1.8         | 5.8                  | 57.6        | 3.0         | 43.0        |
|           | Emb.                             |             |             |                      |             |             |                      |             |             |             |
|           | CFLOW-AD Gudovskiy et al. (2022) | 88.6        | 87.5        | 77.6                 | 98.9        | 23.2        | 26.9                 | 93.4        | 15.6        | 72.6        |
|           | PyramidalFlow Lei et al. (2023)  | 57.8        | 42.5        | 57.3                 | 88.8        | 0.7         | 2.6                  | 60.3        | 1.3         | 45.3        |
|           | Rec.                             |             |             |                      |             |             |                      |             |             |             |
|           | RD Deng & Li (2022)              | 90.0        | 88.5        | 79.4                 | <b>99.5</b> | 30.6        | 35.9                 | 96.3        | 21.9        | 75.8        |
|           | DiAD He et al. (2024b)           | 80.0        | 80.0        | 77.3                 | 91.1        | 7.7         | 15.4                 | 67.5        | 8.4         | 59.9        |
|           | ViTAD Zhang et al. (2023a)       | 86.0        | 85.1        | 74.5                 | 98.5        | 24.8        | 32.4                 | 89.3        | 19.3        | 71.6        |
|           | InvAD Zhang et al. (2024a)       | <b>92.1</b> | <b>90.3</b> | <b>81.7</b>          | <u>99.4</u> | <u>30.4</u> | <u>36.1</u>          | <u>95.1</u> | <u>22.0</u> | <b>76.6</b> |
|           | InvAD-lite Zhang et al. (2024a)  | 88.7        | 87.2        | 77.4                 | <u>99.3</u> | 28.9        | 33.6                 | 94.8        | 20.2        | 74.3        |
|           | MambaAD He et al. (2024a)        | 88.4        | 86.9        | 76.7                 | 99.2        | 27.4        | 35.7                 | 93.8        | 21.7        | 74.0        |
|           | Hybrid                           |             |             |                      |             |             |                      |             |             |             |
|           | UniAD You et al. (2022)          | 90.2        | 88.8        | <u>80.2</u>          | 99.3        | 25.4        | 32.0                 | 94.4        | 19.1        | 74.6        |
|           | RD++ Tien et al. (2023)          | 90.6        | 89.4        | <u>79.7</u>          | <b>99.5</b> | 29.2        | 35.9                 | <b>96.8</b> | 21.9        | 76.0        |
|           | DesTSeg Zhang et al. (2023c)     | 80.5        | 79.5        | 68.4                 | 83.3        | <b>53.8</b> | <b>53.0</b>          | 56.0        | <b>36.1</b> | 68.8        |
| fire hood | Aug.                             |             |             |                      |             |             |                      |             |             |             |
|           | DRAEM Zavrtanik et al. (2021)    | 56.3        | 39.5        | 53.4                 | 42.7        | 0.1         | 0.2                  | 9.9         | 0.1         | 31.5        |
|           | SimpleNet Liu et al. (2023)      | 51.3        | 39.9        | 52.9                 | 76.8        | 1.1         | 4.8                  | 39.9        | 2.5         | 39.3        |
|           | CFA Lee et al. (2022)            | 56.2        | 40.6        | 52.9                 | 79.6        | 0.4         | 1.4                  | 42.0        | 0.7         | 40.4        |
|           | Emb.                             |             |             |                      |             |             |                      |             |             |             |
|           | CFLOW-AD Gudovskiy et al. (2022) | 80.3        | 73.8        | 68.2                 | 98.1        | 21.6        | 22.7                 | 86.0        | 12.8        | 65.6        |
|           | PyramidalFlow Lei et al. (2023)  | 56.5        | 39.1        | 54.1                 | 50.0        | 0.2         | 0.1                  | 15.4        | 0.1         | 33.2        |
|           | Rec.                             |             |             |                      |             |             |                      |             |             |             |
|           | RD Deng & Li (2022)              | 78.4        | 70.8        | 64.5                 | <u>98.9</u> | <u>28.3</u> | <u>34.6</u>          | 88.4        | 20.9        | 66.9        |
|           | DiAD He et al. (2024b)           | <b>83.3</b> | <b>81.7</b> | <b>80.5</b>          | 91.8        | 3.2         | 9.2                  | 66.7        | 4.8         | 59.5        |
|           | ViTAD Zhang et al. (2023a)       | 75.6        | 67.8        | 60.6                 | 98.0        | 18.0        | 27.8                 | 82.5        | 16.1        | 62.3        |
|           | InvAD Zhang et al. (2024a)       | 82.1        | 75.1        | 68.3                 | <b>99.0</b> | 28.2        | 35.3                 | <b>89.4</b> | 21.5        | <b>69.1</b> |
|           | InvAD-lite Zhang et al. (2024a)  | 80.0        | 73.6        | 65.6                 | 98.8        | 24.4        | 31.6                 | 87.5        | 18.7        | 66.8        |
|           | MambaAD He et al. (2024a)        | 79.9        | 73.5        | 65.4                 | 98.7        | 25.9        | 33.0                 | 86.8        | 19.7        | 67.0        |
|           | Hybrid                           |             |             |                      |             |             |                      |             |             |             |
|           | UniAD You et al. (2022)          | 80.3        | <u>74.5</u> | 66.8                 | 98.6        | 25.6        | 33.5                 | 84.8        | 20.1        | <u>67.2</u> |
|           | RD++ Tien et al. (2023)          | 80.5        | 73.7        | 66.7                 | 98.9        | <b>29.2</b> | <b>36.6</b>          | <b>89.4</b> | <b>22.4</b> | <u>68.6</u> |
|           | DesTSeg Zhang et al. (2023c)     | 75.6        | 65.6        | 61.5                 | 78.4        | 26.7        | 34.1                 | 45.9        | 20.6        | 56.9        |
| mint      | Aug.                             |             |             |                      |             |             |                      |             |             |             |
|           | DRAEM Zavrtanik et al. (2021)    | 51.8        | 46.9        | 64.0                 | 45.3        | 0.1         | 0.1                  | 13.9        | 0.1         | 34.5        |
|           | SimpleNet Liu et al. (2023)      | 55.7        | 51.9        | 63.8                 | 73.1        | 0.5         | 3.0                  | 26.8        | 1.5         | 41.5        |
|           | CFA Lee et al. (2022)            | 51.2        | 49.0        | 63.8                 | 77.1        | 0.1         | 0.3                  | 39.2        | 0.2         | 41.9        |
|           | Emb.                             |             |             |                      |             |             |                      |             |             |             |
|           | CFLOW-AD Gudovskiy et al. (2022) | 63.6        | 64.1        | 63.7                 | 92.8        | 8.7         | 12.8                 | 61.4        | 6.8         | 53.9        |
|           | PyramidalFlow Lei et al. (2023)  | 57.0        | 51.2        | 63.8                 | 50.0        | 0.0         | 0.1                  | 15.0        | 0.1         | 36.8        |
|           | Rec.                             |             |             |                      |             |             |                      |             |             |             |
|           | RD Deng & Li (2022)              | 66.3        | 64.6        | 65.1                 | 94.9        | 12.8        | 23.8                 | 73.5        | 13.5        | 58.3        |
|           | DiAD He et al. (2024b)           | 76.7        | 76.7        | <b>76.0</b>          | 91.1        | 5.7         | 11.6                 | 64.2        | 6.2         | 57.4        |
|           | ViTAD Zhang et al. (2023a)       | 69.2        | 70.1        | 64.9                 | 94.7        | 13.9        | 26.6                 | 70.0        | 15.3        | 59.7        |
|           | InvAD Zhang et al. (2024a)       | <b>76.8</b> | <b>77.1</b> | 68.9                 | <b>98.2</b> | <u>18.5</u> | <b>29.1</b>          | <b>82.8</b> | <b>17.0</b> | <b>65.7</b> |
|           | InvAD-lite Zhang et al. (2024a)  | 72.0        | 73.1        | <u>66.2</u>          | <u>97.3</u> | <u>17.9</u> | 28.6                 | <u>80.0</u> | <u>16.7</u> | <u>63.2</u> |
|           | MambaAD He et al. (2024a)        | 72.6        | 73.8        | <u>66.2</u>          | 97.1        | 16.7        | 27.2                 | 76.9        | 15.8        | 62.7        |
|           | Hybrid                           |             |             |                      |             |             |                      |             |             |             |
|           | UniAD You et al. (2022)          | 67.6        | 68.6        | 64.4                 | 94.6        | 9.3         | 22.2                 | 63.2        | 12.5        | 57.1        |
|           | RD++ Tien et al. (2023)          | 67.6        | 66.6        | 65.2                 | 96.2        | 13.7        | 25.2                 | 76.9        | 14.4        | 59.7        |
|           | DesTSeg Zhang et al. (2023c)     | 62.8        | 60.6        | 64.2                 | 66.5        | <b>21.1</b> | <u>27.5</u>          | 27.5        | 15.9        | 49.1        |
| mounts    | Aug.                             |             |             |                      |             |             |                      |             |             |             |
|           | DRAEM Zavrtanik et al. (2021)    | 49.8        | 34.4        | 52.1                 | 37.5        | 0.1         | 0.2                  | 10.3        | 0.1         | 28.7        |
|           | SimpleNet Liu et al. (2023)      | 49.9        | 39.2        | 52.1                 | 87.2        | 1.4         | 4.2                  | 63.0        | 2.2         | 43.0        |
|           | CFA Lee et al. (2022)            | 62.8        | 49.5        | 53.9                 | 89.9        | 3.3         | 9.3                  | 68.6        | 4.9         | 49.1        |
|           | Emb.                             |             |             |                      |             |             |                      |             |             |             |
|           | CFLOW-AD Gudovskiy et al. (2022) | 82.9        | 74.5        | 70.3                 | 96.1        | 16.9        | 25.5                 | 86.4        | 14.6        | 66.1        |
|           | PyramidalFlow Lei et al. (2023)  | 56.1        | 41.1        | 52.1                 | 82.7        | 1.0         | 4.0                  | 54.3        | 2.0         | 42.6        |
|           | Rec.                             |             |             |                      |             |             |                      |             |             |             |
|           | RD Deng & Li (2022)              | 88.6        | <u>79.8</u> | 75.0                 | <u>99.3</u> | <u>30.7</u> | <u>37.5</u>          | <u>95.1</u> | <u>23.0</u> | <u>73.4</u> |
|           | DiAD He et al. (2024b)           | 75.3        | 74.5        | <b>82.5</b>          | 84.3        | 0.4         | 1.1                  | 48.8        | 0.5         | 52.4        |
|           | ViTAD Zhang et al. (2023a)       | 84.9        | 74.8        | 71.4                 | 98.8        | 25.1        | 32.2                 | 91.7        | 19.2        | 69.5        |
|           | InvAD Zhang et al. (2024a)       | <b>88.9</b> | 79.3        | <u>77.2</u>          | <b>99.4</b> | <b>31.2</b> | 35.7                 | <u>94.2</u> | 21.7        | <b>73.5</b> |
|           | InvAD-lite Zhang et al. (2024a)  | 87.4        | 76.6        | 75.7                 | <u>99.3</u> | 27.4        | 32.7                 | <u>94.2</u> | 19.5        | 71.6        |
|           | MambaAD He et al. (2024a)        | 87.4        | 78.3        | 74.2                 | <u>99.1</u> | 30.9        | 35.2                 | <u>92.6</u> | 21.3        | 72.2        |
|           | Hybrid                           |             |             |                      |             |             |                      |             |             |             |
|           | UniAD You et al. (2022)          | 87.2        | 75.6        | <u>76.2</u>          | <b>99.4</b> | 28.1        | 33.6                 | <b>95.3</b> | 20.2        | 71.9        |
|           | RD++ Tien et al. (2023)          | 88.5        | <b>80.6</b> | 74.5                 | <u>99.3</u> | 28.8        | <u>36.2</u>          | <b>95.3</b> | 22.1        | <u>73.1</u> |
|           | DesTSeg Zhang et al. (2023c)     | 72.8        | 53.9        | 62.6                 | 79.6        | 27.5        | <b>37.6</b>          | 58.0        | <b>23.1</b> | 56.9        |

Table A48: Benchmarked results on Real-IAD dataset Wang et al. (2024) by the suggested metrics in Sec. 3.3.

|               | Method                           | Image-level |             |                      | Pixel-level |             |                      | mAU-PRO     | mIoU-max    | mAD         |
|---------------|----------------------------------|-------------|-------------|----------------------|-------------|-------------|----------------------|-------------|-------------|-------------|
|               |                                  | mAU-ROC     | mAP         | mF <sub>1</sub> -max | mAU-ROC     | mAP         | mF <sub>1</sub> -max |             |             |             |
| pcb           | Aug.                             |             |             |                      |             |             |                      |             |             |             |
|               | DRAEM Zavrtanik et al. (2021)    | 56.8        | 64.0        | 76.2                 | 45.3        | 0.1         | 0.3                  | 13.9        | 0.2         | 40.3        |
|               | SimpleNet Liu et al. (2023)      | 54.2        | 63.4        | 75.5                 | 76.8        | 0.4         | 1.0                  | 45.8        | 0.5         | 47.7        |
|               | CFA Lee et al. (2022)            | 51.5        | 62.4        | 75.5                 | 88.6        | 1.2         | 3.5                  | 58.6        | 1.8         | 50.6        |
|               | Emb.                             |             |             |                      |             |             |                      |             |             |             |
|               | CFLOW-AD Gudovskiy et al. (2022) | 74.3        | 83.2        | 76.6                 | 95.1        | 15.0        | 23.8                 | 75.6        | 13.5        | 65.2        |
|               | PyramidalFlow Lei et al. (2023)  | 54.8        | 64.5        | 75.7                 | 81.6        | 0.3         | 0.7                  | 45.0        | 0.4         | 48.5        |
|               | RD Deng & Li (2022)              | 79.2        | 85.4        | 79.7                 | 97.5        | 16.1        | 24.3                 | 88.6        | 13.8        | 69.0        |
|               | DiAD He et al. (2024b)           | 86.0        | 85.1        | 85.4                 | 92.0        | 3.7         | 7.4                  | 66.5        | 3.8         | 60.9        |
|               | Rec.                             |             |             |                      |             |             |                      |             |             |             |
|               | ViTAD Zhang et al. (2023a)       | 83.3        | 89.2        | 81.2                 | 98.2        | 25.7        | 33.6                 | 88.2        | 20.2        | 73.0        |
| phone.battery | InvAD Zhang et al. (2024a)       | <b>91.9</b> | <b>95.2</b> | <b>86.9</b>          | <b>99.4</b> | <b>50.7</b> | <b>53.2</b>          | <b>94.9</b> | <b>36.2</b> | <b>82.9</b> |
|               | InvAD-lite Zhang et al. (2024a)  | 90.3        | 94.3        | 85.4                 | 99.3        | 49.1        | 51.9                 | 94.5        | 35.1        | 81.8        |
|               | MambaAD He et al. (2024a)        | 90.3        | 94.3        | 85.1                 | 99.2        | 48.4        | 51.7                 | 93.8        | 34.9        | 81.6        |
|               | Hybrid                           |             |             |                      |             |             |                      |             |             |             |
|               | UniAD You et al. (2022)          | 81.0        | 88.2        | 78.9                 | 97.2        | 22.0        | 32.1                 | 81.7        | 19.1        | 70.5        |
|               | RD++ Tien et al. (2023)          | 82.2        | 88.3        | 80.6                 | 97.9        | 22.6        | 31.0                 | 89.0        | 18.3        | 71.9        |
|               | DesTSeg Zhang et al. (2023c)     | 82.0        | 89.2        | 79.0                 | 90.0        | 50.6        | 52.6                 | 66.1        | 35.7        | 74.1        |
|               | Aug.                             |             |             |                      |             |             |                      |             |             |             |
|               | DRAEM Zavrtanik et al. (2021)    | 51.7        | 46.1        | 58.0                 | 45.8        | 0.1         | 0.2                  | 14.6        | 0.1         | 33.6        |
|               | SimpleNet Liu et al. (2023)      | 55.2        | 48.7        | 58.1                 | 75.4        | 1.5         | 6.0                  | 46.8        | 3.1         | 43.2        |
|               | CFA Lee et al. (2022)            | 49.9        | 43.5        | 58.0                 | 64.0        | 0.9         | 3.1                  | 40.6        | 1.6         | 38.8        |
|               | Emb.                             |             |             |                      |             |             |                      |             |             |             |
|               | CFLOW-AD Gudovskiy et al. (2022) | 74.9        | 73.4        | 64.2                 | 75.2        | 13.6        | 22.7                 | 83.9        | 12.8        | 59.8        |
| plastic.nut   | PyramidalFlow Lei et al. (2023)  | 45.5        | 36.1        | 58.4                 | 71.6        | 0.4         | 1.2                  | 27.2        | 0.6         | 35.9        |
|               | RD Deng & Li (2022)              | 87.5        | 82.5        | 77.4                 | 77.3        | 22.3        | 32.1                 | 94.6        | 19.1        | 69.5        |
|               | DiAD He et al. (2024b)           | 82.3        | 77.7        | 75.9                 | 96.8        | 5.3         | 11.4                 | 85.4        | 6.0         | 62.1        |
|               | Rec.                             |             |             |                      |             |             |                      |             |             |             |
|               | ViTAD Zhang et al. (2023a)       | 90.7        | 89.3        | 79.4                 | 98.8        | 24.1        | 32.3                 | 91.0        | 19.3        | 74.0        |
|               | InvAD Zhang et al. (2024a)       | <b>91.2</b> | 87.7        | 80.8                 | 86.2        | 22.2        | 30.4                 | 95.1        | 17.9        | 72.5        |
|               | InvAD-lite Zhang et al. (2024a)  | <b>91.2</b> | <b>89.6</b> | <b>81.8</b>          | 80.3        | 25.5        | 33.8                 | <b>95.7</b> | 20.3        | 73.2        |
|               | MambaAD He et al. (2024a)        | 90.2        | 88.6        | 80.6                 | <b>99.4</b> | <b>35.2</b> | <b>39.9</b>          | <b>95.5</b> | <b>24.9</b> | <b>77.0</b> |
|               | Hybrid                           |             |             |                      |             |             |                      |             |             |             |
|               | UniAD You et al. (2022)          | 84.9        | 81.2        | 73.5                 | 89.1        | 10.5        | 18.4                 | 88.7        | 10.1        | 65.8        |
|               | RD++ Tien et al. (2023)          | 88.6        | 85.1        | 78.4                 | 83.4        | 22.5        | 31.9                 | 95.1        | 19.0        | 71.1        |
|               | DesTSeg Zhang et al. (2023c)     | 83.4        | 78.5        | 71.9                 | 75.6        | 10.5        | 20.6                 | 62.3        | 11.5        | 60.1        |
| plastic.plug  | Aug.                             |             |             |                      |             |             |                      |             |             |             |
|               | DRAEM Zavrtanik et al. (2021)    | 53.7        | 34.0        | 51.7                 | 51.4        | 0.1         | 0.1                  | 16.7        | 0.0         | 31.8        |
|               | SimpleNet Liu et al. (2023)      | 61.9        | 43.0        | 52.6                 | 74.0        | 0.5         | 2.3                  | 40.9        | 1.2         | 41.0        |
|               | CFA Lee et al. (2022)            | 60.2        | 39.8        | 52.9                 | 75.3        | 0.2         | 0.8                  | 39.1        | 0.4         | 39.9        |
|               | Emb.                             |             |             |                      |             |             |                      |             |             |             |
|               | CFLOW-AD Gudovskiy et al. (2022) | 69.7        | 60.5        | 53.6                 | 95.6        | 13.4        | 14.9                 | 79.1        | 8.0         | 56.0        |
|               | PyramidalFlow Lei et al. (2023)  | 45.0        | 29.3        | 49.7                 | 76.3        | 0.1         | 0.4                  | 29.3        | 0.2         | 33.9        |
|               | RD Deng & Li (2022)              | 81.3        | 70.0        | 64.5                 | 98.8        | 22.4        | 30.4                 | 92.6        | 17.9        | 66.5        |
|               | DiAD He et al. (2024b)           | 71.9        | 58.2        | 65.6                 | 81.1        | 0.4         | 3.4                  | 38.6        | 1.7         | 45.6        |
|               | Rec.                             |             |             |                      |             |             |                      |             |             |             |
|               | ViTAD Zhang et al. (2023a)       | 82.3        | 73.8        | 64.8                 | 97.6        | 20.8        | 28.3                 | 87.1        | 16.5        | 66.0        |
| plastic.plug  | InvAD Zhang et al. (2024a)       | <b>89.7</b> | <b>82.7</b> | <b>74.6</b>          | <b>99.5</b> | 29.0        | 32.7                 | <b>96.9</b> | 19.6        | <b>73.4</b> |
|               | InvAD-lite Zhang et al. (2024a)  | 88.7        | 81.6        | 73.3                 | <b>99.5</b> | 30.3        | 34.6                 | <b>97.0</b> | 20.9        | <b>73.3</b> |
|               | MambaAD He et al. (2024a)        | 87.8        | 82.0        | 71.9                 | <b>99.5</b> | 34.3        | 38.0                 | 96.8        | 23.4        | <b>73.9</b> |
|               | Hybrid                           |             |             |                      |             |             |                      |             |             |             |
|               | UniAD You et al. (2022)          | 80.1        | 70.5        | 63.0                 | 98.4        | 23.0        | 28.4                 | 89.9        | 16.5        | 65.6        |
|               | RD++ Tien et al. (2023)          | 79.8        | 69.1        | 63.7                 | 98.9        | 21.9        | 28.8                 | 92.5        | 16.8        | 65.7        |
|               | DesTSeg Zhang et al. (2023c)     | 84.8        | 78.4        | 68.9                 | 85.2        | <b>49.2</b> | <b>49.5</b>          | 62.7        | <b>32.9</b> | 69.5        |
|               | Aug.                             |             |             |                      |             |             |                      |             |             |             |
|               | DRAEM Zavrtanik et al. (2021)    | 64.1        | 52.9        | 54.8                 | 41.6        | 0.0         | 0.1                  | 9.4         | 0.0         | 35.0        |
|               | SimpleNet Liu et al. (2023)      | 51.3        | 40.0        | 54.6                 | 75.9        | 0.2         | 0.8                  | 38.6        | 0.4         | 38.8        |
|               | CFA Lee et al. (2022)            | 42.0        | 33.4        | 54.6                 | 85.6        | 0.2         | 0.9                  | 53.7        | 0.5         | 39.2        |
|               | Emb.                             |             |             |                      |             |             |                      |             |             |             |
|               | CFLOW-AD Gudovskiy et al. (2022) | 78.8        | 75.2        | 64.9                 | 97.2        | 11.8        | 20.7                 | 85.7        | 11.5        | 63.4        |
| plastic.plug  | PyramidalFlow Lei et al. (2023)  | 46.2        | 35.2        | 54.6                 | 79.7        | 0.1         | 0.3                  | 40.5        | 0.2         | 37.7        |
|               | RD Deng & Li (2022)              | 82.6        | 75.5        | 68.8                 | 99.1        | 21.3        | 30.2                 | <b>95.5</b> | 17.8        | 68.6        |
|               | DiAD He et al. (2024b)           | 88.7        | <b>89.2</b> | <b>90.9</b>          | 92.9        | 8.7         | 15.0                 | 66.1        | 8.1         | 64.5        |
|               | Rec.                             |             |             |                      |             |             |                      |             |             |             |
|               | ViTAD Zhang et al. (2023a)       | 80.8        | 74.7        | 66.7                 | 97.5        | 13.3        | 22.6                 | 84.6        | 12.7        | 64.3        |
|               | InvAD Zhang et al. (2024a)       | <b>89.0</b> | 82.9        | 76.2                 | 99.0        | 22.9        | 30.7                 | 94.3        | 18.1        | 72.2        |
|               | InvAD-lite Zhang et al. (2024a)  | 88.0        | 83.9        | 74.6                 | 99.1        | <b>26.2</b> | <b>33.7</b>          | 94.3        | <b>20.2</b> | <b>72.7</b> |
|               | MambaAD He et al. (2024a)        | 86.5        | 83.4        | 72.8                 | 99.0        | 25.2        | 32.3                 | 93.0        | 19.3        | 71.6        |
|               | Hybrid                           |             |             |                      |             |             |                      |             |             |             |
|               | UniAD You et al. (2022)          | 80.9        | 76.6        | 66.8                 | 98.6        | 18.4        | 27.1                 | 89.9        | 15.7        | 66.6        |
|               | RD++ Tien et al. (2023)          | 85.5        | 77.9        | 73.2                 | <b>99.2</b> | 21.3        | 28.8                 | <b>95.8</b> | 16.8        | 70.1        |
|               | DesTSeg Zhang et al. (2023c)     | 73.6        | 64.7        | 61.6                 | 71.9        | 4.4         | 8.7                  | 41.7        | 4.6         | 49.2        |



Table A49: Benchmarked results on Real-IAD dataset Wang et al. (2024) by the suggested metrics in Sec. 3.3.

|                   | Method                           | Image-level |             |                      | Pixel-level |             |                      | mAU-PRO     | mIoU-max    | mAD         |
|-------------------|----------------------------------|-------------|-------------|----------------------|-------------|-------------|----------------------|-------------|-------------|-------------|
|                   |                                  | mAU-ROC     | mAP         | mF <sub>1</sub> -max | mAU-ROC     | mAP         | mF <sub>1</sub> -max |             |             |             |
| porcelain_doll    | Aug.                             |             |             |                      |             |             |                      |             |             |             |
|                   | DRAEM Zavrtanik et al. (2021)    | 45.1        | 29.1        | 49.8                 | 46.6        | 0.1         | 0.1                  | 14.6        | 0.1         | 28.3        |
|                   | SimpleNet Liu et al. (2023)      | 63.5        | 50.7        | 51.2                 | 81.4        | 2.4         | 7.4                  | 48.9        | 3.8         | 45.1        |
|                   | CFA Lee et al. (2022)            | 69.4        | 55.1        | 55.2                 | 80.1        | 0.1         | 0.3                  | 41.7        | 0.2         | 45.2        |
|                   | Emb.                             |             |             |                      |             |             |                      |             |             |             |
|                   | CFLOW-AD Gudovskiy et al. (2022) | 83.6        | 78.1        | 68.2                 | 97.1        | 14.0        | 20.9                 | 86.6        | 11.7        | 65.6        |
|                   | PyramidalFlow Lei et al. (2023)  | 48.7        | 34.0        | 49.8                 | 84.5        | 0.2         | 0.3                  | 48.7        | 0.2         | 38.8        |
|                   | Rec.                             |             |             |                      |             |             |                      |             |             |             |
|                   | RD Deng & Li (2022)              | 87.3        | 78.2        | 72.3                 | 99.2        | 25.1        | 33.8                 | 96.1        | 20.3        | 71.4        |
|                   | DiAD He et al. (2024b)           | 72.6        | 66.8        | 65.2                 | 93.1        | 1.4         | 4.8                  | 70.4        | 2.5         | 53.5        |
|                   | ViTAD Zhang et al. (2023a)       | 86.4        | 77.5        | 70.8                 | 99.0        | 21.6        | 29.7                 | 94.7        | 17.4        | 69.7        |
|                   | InvAD Zhang et al. (2024a)       | 87.1        | 78.2        | 70.5                 | 98.5        | 23.3        | 33.0                 | 92.7        | 19.7        | 70.2        |
|                   | InvAD-lite Zhang et al. (2024a)  | <b>88.6</b> | <b>82.8</b> | <b>74.4</b>          | <b>99.3</b> | <u>32.0</u> | <u>36.6</u>          | <u>96.4</u> | <u>22.4</u> | <b>74.0</b> |
|                   | MambaAD He et al. (2024a)        | 88.4        | 82.7        | <b>74.4</b>          | 99.2        | <u>32.2</u> | <u>36.9</u>          | 95.9        | <u>22.6</u> | 73.9        |
|                   | Hybrid                           |             |             |                      |             |             |                      |             |             |             |
|                   | UniAD You et al. (2022)          | 84.9        | 76.0        | 70.3                 | 98.6        | 14.9        | 24.8                 | 93.3        | 14.1        | 67.5        |
|                   | RD++ Tien et al. (2023)          | 88.4        | <u>80.7</u> | 72.6                 | <b>99.3</b> | 26.3        | 34.7                 | <b>96.7</b> | 21.0        | <u>72.4</u> |
|                   | DesTSeg Zhang et al. (2023c)     | 75.0        | 61.4        | 59.4                 | 76.3        | <b>35.4</b> | <b>38.7</b>          | 44.5        | <b>24.0</b> | 57.0        |
| regulator         | Aug.                             |             |             |                      |             |             |                      |             |             |             |
|                   | DRAEM Zavrtanik et al. (2021)    | 46.1        | 26.1        | 43.8                 | 38.8        | 0.0         | 0.1                  | 11.4        | 0.0         | 25.6        |
|                   | SimpleNet Liu et al. (2023)      | 47.5        | 26.2        | 43.8                 | 79.9        | 0.1         | 0.7                  | 40.8        | 0.4         | 34.8        |
|                   | CFA Lee et al. (2022)            | 55.7        | 32.2        | 45.1                 | 81.4        | 0.4         | 1.4                  | 41.5        | 0.7         | 37.8        |
|                   | Emb.                             |             |             |                      |             |             |                      |             |             |             |
|                   | CFLOW-AD Gudovskiy et al. (2022) | 50.5        | 29.5        | 43.9                 | 88.2        | 1.2         | 2.1                  | 58.0        | 1.0         | 39.3        |
|                   | PyramidalFlow Lei et al. (2023)  | 55.1        | 31.3        | 44.9                 | 76.9        | 0.1         | 0.3                  | 42.9        | 0.1         | 36.9        |
|                   | Rec.                             |             |             |                      |             |             |                      |             |             |             |
|                   | RD Deng & Li (2022)              | 67.9        | 49.9        | 48.9                 | 98.1        | 9.0         | 17.7                 | 89.6        | 9.7         | 54.6        |
|                   | DiAD He et al. (2024b)           | 72.1        | 71.4        | <b>78.2</b>          | 84.2        | 0.4         | 1.5                  | 44.4        | 0.7         | 50.3        |
|                   | ViTAD Zhang et al. (2023a)       | 61.3        | 45.6        | 44.7                 | 95.6        | 7.6         | 17.8                 | 78.3        | 9.8         | 50.2        |
|                   | InvAD Zhang et al. (2024a)       | <b>84.5</b> | <b>78.6</b> | 68.8                 | <b>99.5</b> | 25.9        | <b>33.7</b>          | <b>96.6</b> | <b>20.3</b> | <b>70.6</b> |
|                   | InvAD-lite Zhang et al. (2024a)  | 75.7        | <u>67.1</u> | <u>57.3</u>          | 98.7        | 18.1        | 29.2                 | 92.6        | 17.1        | 63.2        |
|                   | MambaAD He et al. (2024a)        | 72.1        | 62.7        | 53.4                 | 97.9        | <u>21.7</u> | <u>30.1</u>          | 88.5        | <u>17.7</u> | <u>61.1</u> |
|                   | Hybrid                           |             |             |                      |             |             |                      |             |             |             |
|                   | UniAD You et al. (2022)          | 51.9        | 34.4        | 44.3                 | 94.2        | 7.3         | 14.9                 | 72.1        | 8.1         | 45.3        |
|                   | RD++ Tien et al. (2023)          | 70.3        | 54.4        | 51.2                 | 98.3        | 11.1        | 20.1                 | 90.8        | 11.2        | 56.9        |
|                   | DesTSeg Zhang et al. (2023c)     | 68.9        | 56.3        | 48.6                 | 67.9        | <b>29.1</b> | <u>32.6</u>          | 35.5        | <u>19.5</u> | 49.6        |
| rolled_strip_base | Aug.                             |             |             |                      |             |             |                      |             |             |             |
|                   | DRAEM Zavrtanik et al. (2021)    | 53.3        | 68.5        | 79.8                 | 37.1        | 0.1         | 0.3                  | 9.4         | 0.1         | 39.5        |
|                   | SimpleNet Liu et al. (2023)      | 66.7        | 80.1        | 79.9                 | 77.7        | 1.5         | 4.9                  | 50.3        | 2.5         | 54.6        |
|                   | CFA Lee et al. (2022)            | 54.9        | 68.8        | 80.1                 | 85.0        | 0.7         | 1.6                  | 51.5        | 0.8         | 51.3        |
|                   | Emb.                             |             |             |                      |             |             |                      |             |             |             |
|                   | CFLOW-AD Gudovskiy et al. (2022) | 92.6        | 96.6        | 88.9                 | 97.8        | 10.6        | 15.0                 | 93.2        | 8.1         | 73.4        |
|                   | PyramidalFlow Lei et al. (2023)  | 59.9        | 74.9        | 79.8                 | 88.1        | 1.3         | 3.5                  | 69.1        | 1.8         | 56.0        |
|                   | Rec.                             |             |             |                      |             |             |                      |             |             |             |
|                   | RD Deng & Li (2022)              | 97.8        | 98.8        | 95.1                 | 99.7        | 30.5        | 39.3                 | 98.7        | 24.4        | 82.1        |
|                   | DiAD He et al. (2024b)           | 68.4        | 55.9        | 56.8                 | 87.7        | 0.6         | 3.2                  | 63.4        | 1.6         | 48.0        |
|                   | ViTAD Zhang et al. (2023a)       | 98.3        | 99.1        | 95.5                 | 99.5        | 27.1        | 35.5                 | 97.8        | 21.6        | 81.3        |
|                   | InvAD Zhang et al. (2024a)       | <b>99.3</b> | <b>99.6</b> | <b>97.7</b>          | <b>99.8</b> | <u>32.8</u> | <u>42.5</u>          | <b>99.0</b> | <u>27.0</u> | <b>83.7</b> |
|                   | InvAD-lite Zhang et al. (2024a)  | 98.0        | 99.0        | 95.3                 | <b>99.8</b> | <u>31.6</u> | <u>41.1</u>          | <b>99.0</b> | <u>25.9</u> | <u>82.7</u> |
|                   | MambaAD He et al. (2024a)        | 98.3        | 99.2        | 95.6                 | 99.6        | 27.4        | 32.3                 | 98.2        | 19.2        | 81.0        |
|                   | Hybrid                           |             |             |                      |             |             |                      |             |             |             |
|                   | UniAD You et al. (2022)          | 98.7        | <u>99.3</u> | <u>96.1</u>          | 99.5        | 21.6        | 32.9                 | 98.2        | 19.7        | 80.5        |
|                   | RD++ Tien et al. (2023)          | 96.3        | 97.9        | 93.5                 | 99.7        | 26.8        | 36.4                 | 98.5        | 22.2        | 80.6        |
|                   | DesTSeg Zhang et al. (2023c)     | 96.5        | 98.4        | 93.2                 | 91.2        | <b>55.9</b> | <b>55.5</b>          | 81.4        | <b>38.5</b> | <u>83.5</u> |
| sim_card_set      | Aug.                             |             |             |                      |             |             |                      |             |             |             |
|                   | DRAEM Zavrtanik et al. (2021)    | 56.7        | 62.2        | 70.7                 | 47.5        | 0.2         | 0.3                  | 18.6        | 0.1         | 39.9        |
|                   | SimpleNet Liu et al. (2023)      | 50.3        | 57.9        | 70.7                 | 73.9        | 2.8         | 7.1                  | 30.3        | 3.7         | 44.1        |
|                   | CFA Lee et al. (2022)            | 50.0        | 57.1        | 70.7                 | 79.5        | 0.9         | 3.0                  | 39.3        | 1.5         | 45.0        |
|                   | Emb.                             |             |             |                      |             |             |                      |             |             |             |
|                   | CFLOW-AD Gudovskiy et al. (2022) | 91.5        | 92.9        | 85.3                 | 98.2        | 30.3        | 35.2                 | 87.9        | 21.3        | 76.4        |
|                   | PyramidalFlow Lei et al. (2023)  | 77.9        | 75.3        | 77.1                 | 66.0        | 1.0         | 0.6                  | 31.0        | 0.3         | 50.7        |
|                   | Rec.                             |             |             |                      |             |             |                      |             |             |             |
|                   | RD Deng & Li (2022)              | 91.7        | 92.0        | 85.2                 | 98.4        | 39.3        | 43.6                 | <u>89.0</u> | 27.9        | 78.6        |
|                   | DiAD He et al. (2024b)           | 72.6        | 53.7        | 61.5                 | 89.9        | 1.7         | 5.8                  | 60.4        | 3.0         | 49.4        |
|                   | ViTAD Zhang et al. (2023a)       | 92.9        | 92.4        | <b>89.5</b>          | 96.2        | 23.3        | 31.1                 | 75.4        | 18.4        | 74.1        |
|                   | InvAD Zhang et al. (2024a)       | 94.1        | 94.2        | 87.6                 | 98.0        | 37.7        | 43.0                 | 84.7        | 27.4        | 78.9        |
|                   | InvAD-lite Zhang et al. (2024a)  | <u>94.5</u> | <u>95.0</u> | <u>88.2</u>          | <u>98.6</u> | <u>46.7</u> | <u>46.9</u>          | 88.9        | 30.6        | 81.4        |
|                   | MambaAD He et al. (2024a)        | <b>94.7</b> | <b>95.4</b> | <u>87.9</u>          | <b>98.7</b> | <u>51.0</u> | <u>50.4</u>          | 89.1        | <u>33.7</u> | <u>82.5</u> |
|                   | Hybrid                           |             |             |                      |             |             |                      |             |             |             |
|                   | UniAD You et al. (2022)          | 91.4        | 91.9        | 84.3                 | 97.8        | 34.7        | 41.2                 | 85.8        | 25.9        | 77.0        |
|                   | RD++ Tien et al. (2023)          | 93.7        | 94.1        | 87.2                 | 98.6        | 40.4        | 43.2                 | <b>89.9</b> | 27.6        | 79.8        |
|                   | DesTSeg Zhang et al. (2023c)     | 92.9        | <u>94.4</u> | 86.3                 | 95.7        | <b>69.4</b> | <b>65.7</b>          | 81.0        | <b>49.0</b> | <b>84.6</b> |

Table A50: Benchmarked results on Real-IAD dataset Wang et al. (2024) by the suggested metrics in Sec. 3.3.

|               | Method                             | Image-level |             |                      | Pixel-level |             |                      | mAU-PRO     | mIoU-max    | mAD         |
|---------------|------------------------------------|-------------|-------------|----------------------|-------------|-------------|----------------------|-------------|-------------|-------------|
|               |                                    | mAU-ROC     | mAP         | mF <sub>1</sub> -max | mAU-ROC     | mAP         | mF <sub>1</sub> -max |             |             |             |
| switch        | Aug. DRAEM Zavrtanik et al. (2021) | 46.5        | 52.1        | 68.6                 | 44.5        | 0.3         | 0.6                  | 12.9        | 0.3         | 35.2        |
|               | SimpleNet Liu et al. (2023)        | 47.8        | 53.1        | 68.6                 | 69.9        | 1.2         | 3.1                  | 49.3        | 1.6         | 43.7        |
|               | Emb. CFA Lee et al. (2022)         | 52.2        | 56.1        | 68.6                 | 76.0        | 1.1         | 2.9                  | 44.1        | 1.5         | 45.0        |
|               | CFLOW-AD Gudovskiy et al. (2022)   | 75.3        | 79.9        | 72.5                 | 90.9        | 13.9        | 17.7                 | 78.8        | 9.7         | 63.1        |
|               | PyramidalFlow Lei et al. (2023)    | 60.8        | 62.0        | 69.9                 | 50.0        | 0.3         | 0.6                  | 15.0        | 0.3         | 40.4        |
|               | Rec. RD Deng & Li (2022)           | 84.6        | 87.5        | 78.2                 | 94.4        | 19.4        | 26.6                 | 91.0        | 15.3        | 70.6        |
|               | DiAD He et al. (2024b)             | 73.4        | 49.4        | 61.2                 | 90.5        | 1.4         | 5.3                  | 64.2        | 2.7         | 49.3        |
|               | ViTAD Zhang et al. (2023a)         | 87.8        | 90.0        | 80.6                 | 96.4        | 28.8        | 39.2                 | 88.5        | 24.4        | 74.7        |
|               | InvAD Zhang et al. (2024a)         | <b>95.8</b> | <b>96.8</b> | <b>91.1</b>          | <b>98.9</b> | 43.9        | <b>51.5</b>          | <b>96.0</b> | 34.7        | <b>83.6</b> |
|               | InvAD-lite Zhang et al. (2024a)    | 92.8        | 94.5        | 86.7                 | <b>99.0</b> | <b>44.3</b> | 48.6                 | <b>95.1</b> | 32.1        | <b>81.5</b> |
|               | MambaAD He et al. (2024a)          | 92.4        | 94.3        | 86.3                 | 98.4        | 34.9        | 42.2                 | 93.8        | 26.7        | 79.2        |
|               | Hybrid UniAD You et al. (2022)     | 85.0        | 88.4        | 77.8                 | 98.8        | 51.4        | 55.4                 | 91.1        | 38.3        | 79.0        |
| tape          | RD++ Tien et al. (2023)            | 82.4        | 86.1        | 75.8                 | 95.9        | 22.0        | 29.7                 | 90.9        | 17.5        | 70.5        |
|               | DesTSeg Zhang et al. (2023c)       | 89.4        | 92.4        | 82.1                 | 87.9        | <b>61.3</b> | <b>57.9</b>          | 68.3        | <b>40.8</b> | 78.4        |
|               | Aug. DRAEM Zavrtanik et al. (2021) | 50.0        | 35.4        | 54.6                 | 38.0        | 0.1         | 0.2                  | 11.4        | 0.1         | 29.5        |
|               | SimpleNet Liu et al. (2023)        | 46.3        | 37.4        | 54.6                 | 82.8        | 1.3         | 4.0                  | 42.8        | 2.0         | 39.4        |
|               | Emb. CFA Lee et al. (2022)         | 54.5        | 42.1        | 55.1                 | 80.2        | 0.5         | 1.9                  | 51.1        | 1.0         | 42.0        |
|               | CFLOW-AD Gudovskiy et al. (2022)   | 93.5        | 92.6        | 84.3                 | 99.2        | 24.6        | 24.8                 | 95.6        | 14.2        | 75.6        |
|               | PyramidalFlow Lei et al. (2023)    | 60.4        | 43.3        | 58.3                 | 66.9        | 0.2         | 0.4                  | 10.6        | 0.2         | 36.8        |
|               | Rec. RD Deng & Li (2022)           | 96.2        | 95.4        | 88.4                 | 99.7        | <b>42.0</b> | <b>47.4</b>          | 98.4        | 31.1        | 82.6        |
|               | DiAD He et al. (2024b)             | 73.9        | 57.8        | 66.1                 | 81.7        | 0.4         | 2.7                  | 47.3        | 1.3         | 47.1        |
|               | ViTAD Zhang et al. (2023a)         | 93.6        | 92.6        | 84.6                 | 99.4        | 30.7        | 38.7                 | 95.9        | 24.0        | 78.2        |
|               | InvAD Zhang et al. (2024a)         | <b>97.8</b> | <b>96.9</b> | <b>91.9</b>          | 99.7        | 38.9        | 44.0                 | 98.3        | 28.2        | 82.9        |
|               | InvAD-lite Zhang et al. (2024a)    | 97.3        | 96.4        | 90.1                 | 99.7        | 41.1        | 45.8                 | 98.4        | 29.7        | 82.9        |
| terminalblock | MambaAD He et al. (2024a)          | 97.1        | 96.2        | 89.6                 | <b>99.8</b> | <b>45.9</b> | <b>48.4</b>          | 98.4        | 31.9        | <b>83.7</b> |
|               | Hybrid UniAD You et al. (2022)     | 96.9        | 95.9        | 88.7                 | 99.6        | 31.6        | 38.4                 | 97.5        | 23.8        | 80.3        |
|               | RD++ Tien et al. (2023)            | 96.8        | 95.8        | 89.8                 | <b>99.8</b> | 40.7        | 46.1                 | <b>98.5</b> | 30.0        | <b>82.7</b> |
|               | DesTSeg Zhang et al. (2023c)       | 90.1        | 88.7        | 79.2                 | 87.1        | <b>58.3</b> | <b>55.9</b>          | 67.7        | <b>38.8</b> | 76.6        |
|               | Aug. DRAEM Zavrtanik et al. (2021) | 44.5        | 49.0        | 68.7                 | 46.6        | 0.1         | 0.1                  | 13.6        | 0.1         | 34.6        |
|               | SimpleNet Liu et al. (2023)        | 53.6        | 56.1        | 68.7                 | 85.0        | 0.7         | 2.0                  | 57.7        | 1.0         | 47.9        |
|               | Emb. CFA Lee et al. (2022)         | 55.9        | 59.9        | 68.7                 | 89.9        | 0.7         | 2.8                  | 64.0        | 1.4         | 50.4        |
|               | CFLOW-AD Gudovskiy et al. (2022)   | 81.1        | 84.3        | 76.0                 | 97.0        | 12.1        | 17.7                 | 86.5        | 9.7         | 66.9        |
|               | PyramidalFlow Lei et al. (2023)    | 57.8        | 57.5        | 70.0                 | 91.0        | 0.5         | 1.7                  | 67.3        | 0.8         | 50.9        |
|               | Rec. RD Deng & Li (2022)           | 89.5        | 90.0        | 83.2                 | 99.5        | <b>27.9</b> | <b>35.6</b>          | 98.0        | 21.7        | 76.4        |
|               | DiAD He et al. (2024b)             | 62.1        | 36.4        | 47.8                 | 75.5        | 0.1         | 1.1                  | 38.5        | 0.5         | 37.4        |
|               | ViTAD Zhang et al. (2023a)         | 89.6        | 89.3        | 85.1                 | 98.9        | 20.1        | 30.1                 | 94.8        | 17.7        | 74.5        |
| toothbrush    | InvAD Zhang et al. (2024a)         | <b>97.4</b> | <b>98.0</b> | <b>92.5</b>          | <b>99.8</b> | <b>35.5</b> | <b>39.1</b>          | <b>98.8</b> | <b>24.3</b> | <b>82.1</b> |
|               | InvAD-lite Zhang et al. (2024a)    | 96.9        | 97.6        | 91.4                 | <b>99.8</b> | <b>34.6</b> | <b>38.2</b>          | <b>98.8</b> | 23.6        | <b>81.6</b> |
|               | MambaAD He et al. (2024a)          | 95.3        | 95.5        | 89.8                 | 99.6        | 26.8        | 32.8                 | 97.6        | 19.6        | 78.9        |
|               | Hybrid UniAD You et al. (2022)     | 87.0        | 88.6        | 80.6                 | 99.1        | 22.7        | 30.8                 | 94.6        | 18.2        | 73.6        |
|               | RD++ Tien et al. (2023)            | 89.3        | 90.2        | 82.3                 | 99.5        | 27.7        | 35.0                 | 97.8        | 21.2        | 76.1        |
|               | DesTSeg Zhang et al. (2023c)       | 68.4        | 73.3        | 69.4                 | 69.3        | 22.2        | 27.2                 | 40.3        | 15.7        | 55.1        |
|               | Aug. DRAEM Zavrtanik et al. (2021) | 47.1        | 50.4        | 69.8                 | 39.4        | 0.6         | 1.6                  | 14.2        | 0.8         | 34.9        |
|               | SimpleNet Liu et al. (2023)        | 61.7        | 63.5        | 70.2                 | 79.1        | 3.0         | 7.3                  | 46.3        | 3.8         | 49.5        |
|               | Emb. CFA Lee et al. (2022)         | 58.4        | 60.3        | 70.4                 | 84.6        | 3.8         | 6.7                  | 48.3        | 3.5         | 49.4        |
|               | CFLOW-AD Gudovskiy et al. (2022)   | 70.3        | 74.9        | 71.7                 | 94.7        | 18.8        | 14.0                 | 78.0        | 7.6         | 61.8        |
|               | PyramidalFlow Lei et al. (2023)    | 48.1        | 50.9        | 70.1                 | 50.8        | 8.4         | 2.6                  | 15.6        | 1.3         | 37.9        |
|               | Rec. RD Deng & Li (2022)           | 81.8        | 83.9        | 77.4                 | 96.9        | 26.3        | 33.6                 | 89.0        | 20.2        | 71.2        |
| toothbrush    | DiAD He et al. (2024b)             | <b>91.2</b> | <b>93.7</b> | <b>90.9</b>          | 82.0        | 1.9         | 6.6                  | 54.5        | 3.4         | 60.1        |
|               | ViTAD Zhang et al. (2023a)         | 81.8        | 84.8        | 76.5                 | 96.7        | 25.3        | 34.9                 | 87.1        | 21.1        | 71.0        |
|               | InvAD Zhang et al. (2024a)         | 88.2        | 90.0        | 81.6                 | <b>97.6</b> | <b>29.5</b> | <b>37.8</b>          | 91.0        | 23.3        | <b>75.3</b> |
|               | InvAD-lite Zhang et al. (2024a)    | 87.0        | 88.5        | 80.9                 | 97.4        | <b>29.3</b> | <b>37.0</b>          | 90.8        | 22.7        | 74.5        |
|               | MambaAD He et al. (2024a)          | 86.2        | 87.5        | 80.7                 | <b>97.6</b> | <b>30.1</b> | <b>37.9</b>          | <b>91.9</b> | <b>23.4</b> | 74.6        |
|               | Hybrid UniAD You et al. (2022)     | 81.9        | 83.9        | 77.9                 | 96.1        | 20.5        | 30.2                 | 85.9        | 17.8        | 69.7        |
|               | RD++ Tien et al. (2023)            | 83.6        | 85.5        | 78.7                 | 97.2        | 27.5        | 35.8                 | 90.0        | 21.8        | 72.6        |
|               | DesTSeg Zhang et al. (2023c)       | 72.4        | 76.2        | 71.5                 | 67.3        | 21.8        | 27.9                 | 42.0        | 16.2        | 56.6        |

Table A51: Benchmarked results on Real-IAD dataset Wang et al. (2024) by the suggested metrics in Sec. 3.3.

|                                              | Method | Image-level                                      |             |                      | Pixel-level |             |                      | mAU-PRO     | mIoU-max    | mAD         |             |
|----------------------------------------------|--------|--------------------------------------------------|-------------|----------------------|-------------|-------------|----------------------|-------------|-------------|-------------|-------------|
|                                              |        | mAU-ROC                                          | mAP         | mF <sub>1</sub> -max | mAU-ROC     | mAP         | mF <sub>1</sub> -max |             |             |             |             |
| toy                                          | Aug.   | DRAEM <a href="#">Zavrtanik et al. (2021)</a>    | 55.3        | 60.6                 | 73.6        | 41.6        | 0.1                  | 0.2         | 10.6        | 0.1         | 38.1        |
|                                              |        | SimpleNet <a href="#">Liu et al. (2023)</a>      | 53.7        | 61.8                 | 73.4        | 75.2        | 0.2                  | 0.9         | 36.9        | 0.5         | 45.6        |
|                                              | Emb.   | CFA <a href="#">Lee et al. (2022)</a>            | 47.8        | 56.6                 | 73.4        | 78.3        | 0.3                  | 1.0         | 40.6        | 0.5         | 44.7        |
|                                              |        | CFLOW-AD <a href="#">Gudovskiy et al. (2022)</a> | 60.6        | 68.8                 | 73.7        | 87.5        | 2.1                  | 8.2         | 56.9        | 4.3         | 53.2        |
|                                              |        | PyramidalFlow <a href="#">Lei et al. (2023)</a>  | 56.2        | 65.2                 | 73.4        | 79.8        | 0.4                  | 1.6         | 47.4        | 0.8         | 48.6        |
|                                              |        | RD <a href="#">Deng &amp; Li (2022)</a>          | 70.4        | 74.8                 | 75.7        | 95.1        | 5.1                  | 13.0        | 82.6        | 7.0         | 61.3        |
|                                              | Rec.   | DiAD <a href="#">He et al. (2024b)</a>           | 66.2        | 57.3                 | 59.8        | 82.1        | 1.1                  | 4.2         | 50.3        | 2.1         | 45.9        |
|                                              |        | ViTAD <a href="#">Zhang et al. (2023a)</a>       | 76.5        | 82.9                 | 76.0        | 92.8        | 9.2                  | 19.8        | 79.2        | 11.0        | 64.4        |
|                                              |        | InvAD <a href="#">Zhang et al. (2024a)</a>       | <b>86.8</b> | <b>89.8</b>          | <b>83.5</b> | <b>98.0</b> | 16.6                 | 25.7        | <b>91.8</b> | 14.8        | <b>72.4</b> |
|                                              |        | InvAD-lite <a href="#">Zhang et al. (2024a)</a>  | 84.4        | 88.9                 | 80.3        | <b>96.6</b> | <b>18.1</b>          | <b>29.0</b> | 89.2        | <b>17.0</b> | <b>71.4</b> |
|                                              | Hybrid | MambaAD <a href="#">He et al. (2024a)</a>        | 83.7        | 88.4                 | 79.7        | 96.2        | 16.8                 | 26.1        | 88.0        | 15.0        | 70.4        |
|                                              |        | UniAD <a href="#">You et al. (2022)</a>          | 68.5        | 75.1                 | 74.4        | 93.6        | 4.8                  | 11.8        | 73.0        | 6.3         | 59.2        |
| RD++ <a href="#">Tien et al. (2023)</a>      |        | 73.4                                             | 78.1        | 76.4                 | 96.0        | 7.8         | 17.7                 | 85.6        | 9.7         | 63.9        |             |
| DesTSeg <a href="#">Zhang et al. (2023c)</a> |        | 71.5                                             | 77.5        | 75.8                 | 67.5        | 12.9        | 19.6                 | 47.5        | 10.8        | 55.9        |             |
| toy_brick                                    | Aug.   | DRAEM <a href="#">Zavrtanik et al. (2021)</a>    | 51.5        | 42.9                 | 57.9        | 48.5        | 0.1                  | 0.3         | 11.3        | 0.1         | 32.9        |
|                                              |        | SimpleNet <a href="#">Liu et al. (2023)</a>      | 57.4        | 48.8                 | 57.9        | 85.9        | 4.5                  | 10.6        | 47.0        | 5.6         | 45.8        |
|                                              | Emb.   | CFA <a href="#">Lee et al. (2022)</a>            | 56.7        | 45.9                 | 58.3        | 78.7        | 1.3                  | 3.9         | 40.6        | 2.0         | 42.4        |
|                                              |        | CFLOW-AD <a href="#">Gudovskiy et al. (2022)</a> | 74.2        | 69.7                 | 64.0        | 96.1        | 24.2                 | 26.7        | 79.2        | 15.4        | 62.9        |
|                                              |        | PyramidalFlow <a href="#">Lei et al. (2023)</a>  | 54.6        | 43.4                 | 58.2        | 50.1        | 0.1                  | 0.3         | 15.3        | 0.2         | 34.3        |
|                                              |        | RD <a href="#">Deng &amp; Li (2022)</a>          | 63.4        | 56.2                 | 58.9        | 96.2        | 16.6                 | 24.4        | 75.8        | 13.9        | 56.4        |
|                                              | Rec.   | DiAD <a href="#">He et al. (2024b)</a>           | 68.4        | 45.3                 | 55.9        | 93.5        | 3.1                  | 8.1         | 66.4        | 4.2         | 48.7        |
|                                              |        | ViTAD <a href="#">Zhang et al. (2023a)</a>       | 69.1        | 64.3                 | 60.2        | 94.6        | 20.6                 | 29.4        | 72.9        | 17.2        | 59.5        |
|                                              |        | InvAD <a href="#">Zhang et al. (2024a)</a>       | 74.1        | 67.4                 | 64.4        | 97.6        | 25.4                 | 31.4        | 82.4        | 18.6        | 63.9        |
|                                              |        | InvAD-lite <a href="#">Zhang et al. (2024a)</a>  | 69.1        | 62.4                 | 61.1        | 96.4        | 17.5                 | 24.2        | 78.0        | 13.8        | 59.1        |
|                                              | Hybrid | MambaAD <a href="#">He et al. (2024a)</a>        | 70.6        | 64.0                 | 61.8        | 96.6        | 18.9                 | 26.8        | 75.9        | 15.5        | 60.0        |
|                                              |        | UniAD <a href="#">You et al. (2022)</a>          | <b>78.9</b> | <b>74.6</b>          | <b>68.1</b> | <b>97.7</b> | 21.8                 | 30.4        | <b>82.7</b> | 17.9        | <b>66.0</b> |
| RD++ <a href="#">Tien et al. (2023)</a>      |        | 66.7                                             | 58.3        | 60.6                 | 96.7        | 17.1        | 25.3                 | 77.3        | 14.5        | 58.0        |             |
| DesTSeg <a href="#">Zhang et al. (2023c)</a> |        | 72.7                                             | 68.5        | 62.8                 | 82.5        | <b>30.1</b> | <b>35.7</b>          | 55.5        | <b>21.8</b> | 59.5        |             |
| transistor1                                  | Aug.   | DRAEM <a href="#">Zavrtanik et al. (2021)</a>    | 57.2        | 59.6                 | 72.2        | 43.3        | 0.2                  | 0.6         | 13.0        | 0.3         | 38.6        |
|                                              |        | SimpleNet <a href="#">Liu et al. (2023)</a>      | 61.7        | 66.8                 | 72.6        | 84.5        | 5.4                  | 10.1        | 58.5        | 5.3         | 53.3        |
|                                              | Emb.   | CFA <a href="#">Lee et al. (2022)</a>            | 53.9        | 63.0                 | 72.1        | 87.7        | 3.5                  | 8.7         | 56.8        | 4.5         | 51.1        |
|                                              |        | CFLOW-AD <a href="#">Gudovskiy et al. (2022)</a> | 91.8        | 94.7                 | 86.2        | 98.1        | 26.2                 | 28.3        | 90.7        | 16.5        | 75.9        |
|                                              |        | PyramidalFlow <a href="#">Lei et al. (2023)</a>  | 49.1        | 56.2                 | 72.4        | 77.1        | 0.4                  | 0.9         | 35.3        | 0.4         | 43.8        |
|                                              |        | RD <a href="#">Deng &amp; Li (2022)</a>          | 90.9        | 93.7                 | 85.2        | 99.1        | 30.5                 | 36.5        | 95.5        | 22.3        | 77.7        |
|                                              | Rec.   | DiAD <a href="#">He et al. (2024b)</a>           | 73.1        | 63.1                 | 62.7        | 88.6        | 7.2                  | 15.3        | 58.1        | 8.3         | 52.6        |
|                                              |        | ViTAD <a href="#">Zhang et al. (2023a)</a>       | 91.7        | 93.9                 | 86.3        | 98.8        | 32.0                 | 36.4        | 93.5        | 22.2        | 77.9        |
|                                              |        | InvAD <a href="#">Zhang et al. (2024a)</a>       | <b>97.6</b> | <b>98.2</b>          | <b>94.2</b> | <b>99.5</b> | 38.7                 | 39.9        | <b>97.5</b> | 24.9        | <b>82.8</b> |
|                                              |        | InvAD-lite <a href="#">Zhang et al. (2024a)</a>  | 96.4        | 97.5                 | 92.1        | <b>99.5</b> | 40.5                 | 42.4        | 97.4        | 26.9        | 82.6        |
|                                              | Hybrid | MambaAD <a href="#">He et al. (2024a)</a>        | 94.9        | 96.4                 | 89.2        | 99.4        | 38.1                 | 39.4        | 96.8        | 24.5        | 81.0        |
|                                              |        | UniAD <a href="#">You et al. (2022)</a>          | 93.7        | 95.9                 | 88.8        | 98.9        | 27.3                 | 33.0        | 94.2        | 19.8        | 78.1        |
| RD++ <a href="#">Tien et al. (2023)</a>      |        | 93.4                                             | 95.5        | 89.0                 | 99.3        | 34.6        | 38.5                 | 96.2        | 23.8        | 79.9        |             |
| DesTSeg <a href="#">Zhang et al. (2023c)</a> |        | 88.0                                             | 91.6        | 82.5                 | 87.9        | <b>44.0</b> | <b>44.1</b>          | 67.0        | <b>28.3</b> | 74.1        |             |
| u_block                                      | Aug.   | DRAEM <a href="#">Zavrtanik et al. (2021)</a>    | 55.2        | 35.2                 | 49.4        | 43.5        | 0.1                  | 0.2         | 10.0        | 0.1         | 30.0        |
|                                              |        | SimpleNet <a href="#">Liu et al. (2023)</a>      | 58.4        | 40.0                 | 51.2        | 72.8        | 0.6                  | 2.5         | 40.2        | 1.3         | 39.4        |
|                                              | Emb.   | CFA <a href="#">Lee et al. (2022)</a>            | 54.9        | 38.6                 | 48.9        | 74.7        | 0.3                  | 1.8         | 36.4        | 0.9         | 37.9        |
|                                              |        | CFLOW-AD <a href="#">Gudovskiy et al. (2022)</a> | 80.3        | 73.0                 | 63.8        | 98.4        | 19.9                 | 24.7        | 89.3        | 14.1        | 65.2        |
|                                              |        | PyramidalFlow <a href="#">Lei et al. (2023)</a>  | 44.9        | 28.6                 | 48.8        | 81.9        | 0.5                  | 1.2         | 39.5        | 0.6         | 35.8        |
|                                              |        | RD <a href="#">Deng &amp; Li (2022)</a>          | 90.1        | 85.5                 | 75.4        | <b>99.6</b> | 40.3                 | 45.8        | 97.2        | 29.7        | 77.2        |
|                                              | Rec.   | DiAD <a href="#">He et al. (2024b)</a>           | 75.2        | 68.4                 | 67.9        | 88.8        | 1.6                  | 5.4         | 54.2        | 2.8         | 51.6        |
|                                              |        | ViTAD <a href="#">Zhang et al. (2023a)</a>       | 84.3        | 78.2                 | 67.8        | 99.0        | 30.3                 | 38.4        | 90.8        | 23.8        | 70.7        |
|                                              |        | InvAD <a href="#">Zhang et al. (2024a)</a>       | <b>92.9</b> | <b>89.5</b>          | <b>80.5</b> | <b>99.6</b> | 33.4                 | 41.3        | 96.7        | 26.0        | <b>77.7</b> |
|                                              |        | InvAD-lite <a href="#">Zhang et al. (2024a)</a>  | 90.4        | 86.4                 | 76.2        | <b>99.6</b> | 34.5                 | 43.0        | 96.8        | 27.4        | 76.4        |
|                                              | Hybrid | MambaAD <a href="#">He et al. (2024a)</a>        | 90.0        | 85.8                 | 74.8        | 99.5        | 33.2                 | 42.8        | 96.1        | 27.2        | 75.7        |
|                                              |        | UniAD <a href="#">You et al. (2022)</a>          | 88.2        | 83.7                 | 74.4        | 99.3        | 24.2                 | 32.7        | 94.9        | 19.6        | 72.4        |
| RD++ <a href="#">Tien et al. (2023)</a>      |        | 90.2                                             | 85.9        | 75.7                 | <b>99.6</b> | 34.1        | 41.2                 | <b>97.3</b> | 26.0        | 76.0        |             |
| DesTSeg <a href="#">Zhang et al. (2023c)</a> |        | 76.7                                             | 70.4        | 61.0                 | 83.6        | <b>57.6</b> | <b>55.0</b>          | 53.3        | <b>37.9</b> | 65.9        |             |

Table A52: Benchmarked results on Real-IAD dataset Wang et al. (2024) by the suggested metrics in Sec. 3.3.

|              | Method | Image-level                                      |             |             | Pixel-level |             |             | mAU-PRO     | mIoU-max    | mAD         |             |
|--------------|--------|--------------------------------------------------|-------------|-------------|-------------|-------------|-------------|-------------|-------------|-------------|-------------|
|              |        | mAU-ROC                                          | mAP         | mF1-max     | mAU-ROC     | mAP         | mF1-max     |             |             |             |             |
| usb          | Aug.   | DRAEM <a href="#">Zavrtanik et al. (2021)</a>    | 45.8        | 43.8        | 63.0        | 48.2        | 0.1         | 0.5         | 19.9        | 0.3         | 34.0        |
|              |        | SimpleNet <a href="#">Liu et al. (2023)</a>      | 52.2        | 49.0        | 63.0        | 80.4        | 0.8         | 2.8         | 50.8        | 1.4         | 44.2        |
|              |        | CFA <a href="#">Lee et al. (2022)</a>            | 56.6        | 48.6        | 63.2        | 85.9        | 0.7         | 2.4         | 51.6        | 1.2         | 45.6        |
|              | Emb.   | CFLOW-AD <a href="#">Gudovskiy et al. (2022)</a> | 68.0        | 69.8        | 63.4        | 94.8        | 13.0        | 15.8        | 75.0        | 8.6         | 58.4        |
|              |        | PyramidalFlow <a href="#">Lei et al. (2023)</a>  | 48.3        | 44.5        | 63.0        | 79.2        | 0.2         | 0.2         | 39.8        | 0.1         | 40.9        |
|              |        | RD <a href="#">Deng &amp; Li (2022)</a>          | 85.2        | 84.6        | 75.6        | 98.1        | 26.8        | 35.2        | 91.2        | 21.3        | 72.3        |
|              | Rec.   | DiAD <a href="#">He et al. (2024b)</a>           | 58.9        | 37.4        | 45.7        | 78.0        | 1.0         | 3.1         | 28.0        | 1.6         | 36.0        |
|              |        | ViTAD <a href="#">Zhang et al. (2023a)</a>       | 86.9        | 87.3        | 77.7        | 98.3        | 26.1        | 34.8        | 90.6        | 21.1        | 73.2        |
|              |        | InvAD <a href="#">Zhang et al. (2024a)</a>       | <b>94.1</b> | <b>93.3</b> | <b>86.8</b> | <b>99.5</b> | 38.5        | 44.0        | <b>97.2</b> | 28.2        | <b>80.6</b> |
|              |        | InvAD-lite <a href="#">Zhang et al. (2024a)</a>  | 93.1        | 92.7        | 85.8        | <b>99.5</b> | 37.0        | 43.7        | 96.8        | 27.9        | 79.9        |
|              |        | MambaAD <a href="#">He et al. (2024a)</a>        | 92.7        | 92.7        | 85.3        | 99.3        | 39.7        | 44.8        | 96.0        | 28.9        | 80.1        |
|              |        | UniAD <a href="#">You et al. (2022)</a>          | 80.8        | 81.8        | 70.9        | 98.0        | 21.0        | 30.9        | 85.8        | 18.3        | 68.4        |
| usb_adaptor  | Aug.   | RD++ <a href="#">Tien et al. (2023)</a>          | 85.5        | 85.8        | 75.6        | 98.0        | 27.2        | 36.3        | 90.8        | 22.2        | 72.7        |
|              |        | DesTSeg <a href="#">Zhang et al. (2023c)</a>     | 87.6        | 88.3        | 78.5        | 91.5        | <b>45.0</b> | <b>50.9</b> | 70.5        | <b>34.2</b> | 74.6        |
|              |        | DRAEM <a href="#">Zavrtanik et al. (2021)</a>    | 54.0        | 45.6        | 56.5        | 49.5        | 0.1         | 0.1         | 20.0        | 0.0         | 34.7        |
|              | Emb.   | SimpleNet <a href="#">Liu et al. (2023)</a>      | 49.9        | 40.6        | 56.7        | 52.3        | 0.1         | 0.4         | 19.2        | 0.2         | 33.5        |
|              |        | CFA <a href="#">Lee et al. (2022)</a>            | 52.1        | 41.8        | 56.6        | 78.4        | 0.1         | 0.8         | 39.5        | 0.4         | 39.9        |
|              |        | CFLOW-AD <a href="#">Gudovskiy et al. (2022)</a> | 69.9        | 64.1        | 59.5        | 96.2        | 8.1         | 16.6        | 80.8        | 9.1         | 57.5        |
|              | Rec.   | PyramidalFlow <a href="#">Lei et al. (2023)</a>  | 53.4        | 40.5        | 56.8        | 84.2        | 0.2         | 0.6         | 48.4        | 0.3         | 41.8        |
|              |        | RD <a href="#">Deng &amp; Li (2022)</a>          | 70.9        | 61.0        | 61.9        | 94.4        | 9.7         | 18.7        | 74.4        | 10.3        | 57.0        |
|              |        | DiAD <a href="#">He et al. (2024b)</a>           | 76.9        | 60.2        | 67.2        | 94.0        | 2.3         | 6.6         | 75.5        | 3.4         | 54.7        |
|              |        | ViTAD <a href="#">Zhang et al. (2023a)</a>       | 76.1        | 66.1        | 66.2        | 90.8        | 5.9         | 13.9        | 56.2        | 7.5         | 55.6        |
|              |        | InvAD <a href="#">Zhang et al. (2024a)</a>       | <b>80.0</b> | 74.4        | 66.8        | 96.5        | 15.8        | 24.3        | 79.3        | 13.8        | 63.9        |
|              |        | InvAD-lite <a href="#">Zhang et al. (2024a)</a>  | 79.8        | 74.2        | <b>67.3</b> | <b>97.0</b> | 16.6        | 24.8        | <b>82.8</b> | 14.2        | <b>64.5</b> |
| vepill       | Aug.   | MambaAD <a href="#">He et al. (2024a)</a>        | 79.1        | <b>75.7</b> | 66.0        | <b>97.0</b> | 15.8        | 24.9        | 81.6        | 14.2        | 64.2        |
|              |        | UniAD <a href="#">You et al. (2022)</a>          | 76.9        | 71.5        | 64.3        | 96.5        | 10.9        | 19.8        | 80.1        | 11.0        | 61.4        |
|              |        | RD++ <a href="#">Tien et al. (2023)</a>          | 69.9        | 62.7        | 61.1        | 94.7        | 10.2        | 20.1        | 76.2        | 11.2        | 57.4        |
|              | Emb.   | DesTSeg <a href="#">Zhang et al. (2023c)</a>     | 78.0        | 73.3        | 66.1        | 80.8        | <b>27.6</b> | <b>36.7</b> | 51.2        | <b>22.4</b> | 60.8        |
|              |        | DRAEM <a href="#">Zavrtanik et al. (2021)</a>    | 47.3        | 37.7        | 56.2        | 31.2        | 0.3         | 0.8         | 7.2         | 0.4         | 28.5        |
|              |        | SimpleNet <a href="#">Liu et al. (2023)</a>      | 62.8        | 52.2        | 58.6        | 82.0        | 6.5         | 12.0        | 47.6        | 6.4         | 47.4        |
|              | Rec.   | CFA <a href="#">Lee et al. (2022)</a>            | 58.4        | 47.1        | 57.3        | 85.5        | 4.3         | 9.3         | 54.5        | 4.9         | 46.3        |
|              |        | CFLOW-AD <a href="#">Gudovskiy et al. (2022)</a> | 81.4        | 79.1        | 67.5        | 97.3        | 35.6        | 41.3        | 84.6        | 26.0        | 70.3        |
|              |        | PyramidalFlow <a href="#">Lei et al. (2023)</a>  | 55.7        | 43.9        | 57.8        | 72.3        | 0.6         | 0.8         | 28.4        | 0.4         | 39.0        |
|              |        | RD <a href="#">Deng &amp; Li (2022)</a>          | 85.1        | 80.3        | 72.5        | 98.3        | 43.7        | 48.2        | 89.1        | 31.8        | 74.6        |
|              |        | DiAD <a href="#">He et al. (2024b)</a>           | 64.1        | 40.4        | 56.2        | 90.2        | 1.3         | 5.2         | 60.8        | 2.7         | 45.5        |
|              |        | ViTAD <a href="#">Zhang et al. (2023a)</a>       | 82.2        | 80.5        | 70.4        | 97.6        | 44.4        | 50.0        | 81.3        | 33.3        | 73.0        |
| wooden_beads | Aug.   | InvAD <a href="#">Zhang et al. (2024a)</a>       | <b>90.1</b> | <b>88.0</b> | <b>78.2</b> | 98.9        | <b>50.4</b> | <b>55.2</b> | 91.1        | <b>38.1</b> | <b>79.7</b> |
|              |        | InvAD-lite <a href="#">Zhang et al. (2024a)</a>  | 84.6        | 82.2        | 71.3        | 98.4        | 41.4        | 48.1        | 87.9        | 31.7        | 74.2        |
|              |        | MambaAD <a href="#">He et al. (2024a)</a>        | 88.5        | 87.6        | 77.6        | 98.7        | 47.9        | 52.0        | 89.4        | 35.1        | 78.3        |
|              | Emb.   | UniAD <a href="#">You et al. (2022)</a>          | 88.6        | 86.3        | 75.8        | <b>99.2</b> | 47.3        | 47.7        | <b>92.7</b> | 31.3        | 77.6        |
|              |        | RD++ <a href="#">Tien et al. (2023)</a>          | 85.9        | 82.6        | 73.0        | 98.5        | 46.0        | 50.7        | 90.2        | 34.0        | 75.9        |
|              |        | DesTSeg <a href="#">Zhang et al. (2023c)</a>     | 69.5        | 65.1        | 58.6        | 75.3        | 44.1        | 45.1        | 43.5        | 29.1        | 58.2        |
|              | Rec.   | DRAEM <a href="#">Zavrtanik et al. (2021)</a>    | 52.8        | 44.9        | 60.2        | 43.9        | 0.1         | 0.3         | 12.5        | 0.1         | 33.4        |
|              |        | SimpleNet <a href="#">Liu et al. (2023)</a>      | 56.2        | 52.2        | 60.2        | 75.5        | 1.2         | 4.4         | 36.2        | 2.2         | 42.8        |
|              |        | CFA <a href="#">Lee et al. (2022)</a>            | 55.3        | 46.2        | 60.2        | 83.6        | 0.8         | 3.1         | 48.4        | 1.6         | 43.9        |
|              |        | CFLOW-AD <a href="#">Gudovskiy et al. (2022)</a> | 79.7        | 79.3        | 68.6        | 96.5        | 20.2        | 27.3        | 79.5        | 15.8        | 65.9        |
|              |        | PyramidalFlow <a href="#">Lei et al. (2023)</a>  | 66.4        | 56.3        | 64.8        | 50.1        | 0.6         | 0.3         | 15.1        | 0.1         | 39.5        |
|              |        | RD <a href="#">Deng &amp; Li (2022)</a>          | 81.1        | 79.1        | 70.1        | 97.9        | 27.2        | 35.5        | 85.8        | 21.6        | 69.2        |
| wooden_heads | Aug.   | DiAD <a href="#">He et al. (2024b)</a>           | 62.1        | 56.4        | 65.9        | 85.0        | 1.1         | 4.7         | 45.6        | 2.4         | 45.8        |
|              |        | ViTAD <a href="#">Zhang et al. (2023a)</a>       | 82.8        | 82.3        | 72.9        | 97.1        | 31.0        | 37.4        | 79.4        | 23.0        | 70.3        |
|              |        | InvAD <a href="#">Zhang et al. (2024a)</a>       | <b>86.6</b> | <b>85.6</b> | <b>76.2</b> | <b>98.4</b> | <b>35.5</b> | <b>40.3</b> | <b>88.0</b> | <b>25.3</b> | <b>74.2</b> |
|              | Emb.   | InvAD-lite <a href="#">Zhang et al. (2024a)</a>  | 85.6        | 84.6        | 75.1        | 98.2        | 30.5        | 37.3        | 87.9        | 22.9        | 72.6        |
|              |        | MambaAD <a href="#">He et al. (2024a)</a>        | 83.3        | 82.3        | 72.7        | 98.1        | 32.4        | 39.7        | 85.3        | 24.8        | 71.7        |
|              |        | UniAD <a href="#">You et al. (2022)</a>          | 80.9        | 80.1        | 70.3        | 97.7        | 20.3        | 27.9        | 85.0        | 16.2        | 67.4        |
|              | Hybrid | RD++ <a href="#">Tien et al. (2023)</a>          | 83.4        | 81.4        | 72.5        | 98.2        | 28.9        | 36.5        | 87.8        | 22.3        | 71.0        |
|              |        | DesTSeg <a href="#">Zhang et al. (2023c)</a>     | 78.2        | 73.6        | 69.8        | 77.9        | 30.8        | 34.9        | 50.5        | 21.1        | 61.2        |

Table A53: Benchmarked results on Real-IAD dataset Wang et al. (2024) by the suggested metrics in Sec. 3.3.

|           | Method                             | Image-level |             |                      | Pixel-level |             |                      | mAU-PRO     | mIoU-max    | mAD         |
|-----------|------------------------------------|-------------|-------------|----------------------|-------------|-------------|----------------------|-------------|-------------|-------------|
|           |                                    | mAU-ROC     | mAP         | mF <sub>1</sub> -max | mAU-ROC     | mAP         | mF <sub>1</sub> -max |             |             |             |
| woodstick | Aug. DRAEM Zavrtanik et al. (2021) | 52.9        | 28.3        | 45.2                 | 57.3        | 0.1         | 0.2                  | 22.9        | 0.1         | 31.1        |
|           | SimpleNet Liu et al. (2023)        | 55.7        | 35.7        | 44.6                 | 74.0        | 2.8         | 9.1                  | 32.1        | 4.8         | 37.4        |
|           | Emb. CFA Lee et al. (2022)         | 57.8        | 33.2        | 46.5                 | 70.2        | 0.9         | 4.1                  | 26.5        | 2.1         | 35.6        |
|           | CFLOW-AD Gudovskiy et al. (2022)   | 71.3        | 60.5        | 52.8                 | 92.6        | 32.1        | 38.3                 | 67.9        | 23.7        | 59.6        |
|           | PyramidalFlow Lei et al. (2023)    | 50.1        | 28.1        | 44.4                 | 50.0        | 0.0         | 0.2                  | 15.0        | 0.1         | 28.6        |
|           | Rec. RD Deng & Li (2022)           | 77.5        | 61.9        | 58.5                 | 97.8        | 31.2        | 38.8                 | 85.0        | 24.0        | 64.6        |
|           | DiAD He et al. (2024b)             | 74.1        | 66.0        | 62.1                 | 90.9        | 2.6         | 8.0                  | 60.7        | 4.2         | 52.1        |
|           | ViTAD Zhang et al. (2023a)         | 75.6        | 64.0        | 56.3                 | 96.3        | 38.4        | 43.7                 | 77.8        | 28.0        | 64.7        |
|           | InvAD Zhang et al. (2024a)         | 80.8        | 67.6        | 62.7                 | <b>98.0</b> | 39.0        | 45.1                 | <b>85.9</b> | 29.1        | 68.7        |
|           | InvAD-lite Zhang et al. (2024a)    | 78.7        | 65.9        | 59.3                 | 97.6        | 36.3        | 41.0                 | 83.8        | 25.8        | 66.3        |
|           | MambaAD He et al. (2024a)          | <b>81.8</b> | 71.0        | 64.4                 | 97.9        | 42.8        | 47.0                 | 85.5        | 30.7        | 70.3        |
|           | Hybrid UniAD You et al. (2022)     | 81.1        | <b>73.7</b> | <b>64.6</b>          | 94.8        | 41.5        | 46.0                 | 79.2        | 29.9        | 69.3        |
|           | RD++ Tien et al. (2023)            | 77.2        | 61.2        | 58.2                 | 97.9        | 30.6        | 38.0                 | 85.3        | 23.4        | 64.2        |
|           | DesTSeg Zhang et al. (2023c)       | 80.2        | 70.6        | 60.5                 | 91.9        | <b>61.5</b> | <b>60.5</b>          | 69.9        | <b>43.4</b> | <b>70.7</b> |
|           | Aug. DRAEM Zavrtanik et al. (2021) | 46.5        | 61.6        | 76.7                 | 36.4        | 0.7         | 1.5                  | 11.3        | 0.8         | 37.0        |
|           | SimpleNet Liu et al. (2023)        | 56.8        | 67.7        | 76.7                 | 52.7        | 1.2         | 3.8                  | 24.3        | 1.9         | 43.8        |
| zipper    | Emb. CFA Lee et al. (2022)         | 80.6        | 88.0        | 79.9                 | 92.5        | 15.6        | 22.6                 | 78.3        | 12.7        | 67.5        |
|           | CFLOW-AD Gudovskiy et al. (2022)   | 94.3        | 97.1        | 90.3                 | 98.2        | 34.9        | 35.6                 | 91.0        | 21.6        | 79.4        |
|           | PyramidalFlow Lei et al. (2023)    | 49.2        | 61.7        | 77.5                 | 49.9        | 0.7         | 1.4                  | 15.6        | 0.7         | 39.9        |
|           | Rec. RD Deng & Li (2022)           | 95.4        | 97.2        | 91.6                 | 99.0        | 43.7        | 49.9                 | 96.5        | 33.2        | 83.5        |
|           | DiAD He et al. (2024b)             | 86.0        | 87.0        | 84.0                 | 90.2        | 12.5        | 18.8                 | 53.5        | 10.4        | 61.7        |
|           | ViTAD Zhang et al. (2023a)         | 98.8        | 99.3        | 95.9                 | 99.1        | 47.8        | 50.3                 | 96.4        | 33.6        | 85.7        |
|           | InvAD Zhang et al. (2024a)         | 98.8        | 99.2        | 96.0                 | 99.2        | 54.3        | 56.8                 | 97.0        | 39.7        | 87.4        |
|           | InvAD-lite Zhang et al. (2024a)    | 98.9        | 99.4        | 95.6                 | 99.2        | 54.0        | 57.4                 | 97.0        | 40.3        | 87.4        |
|           | MambaAD He et al. (2024a)          | <b>99.4</b> | <b>99.6</b> | <b>97.1</b>          | <b>99.3</b> | <b>58.4</b> | <b>60.9</b>          | <b>97.6</b> | <b>43.8</b> | <b>88.9</b> |
|           | Hybrid UniAD You et al. (2022)     | 98.2        | 98.9        | 95.3                 | 98.4        | 33.1        | 36.9                 | 95.1        | 22.6        | 81.7        |
|           | RD++ Tien et al. (2023)            | 97.0        | 98.3        | 93.0                 | 99.1        | 47.1        | 51.6                 | 96.4        | 34.7        | 84.8        |
|           | DesTSeg Zhang et al. (2023c)       | 93.4        | 96.0        | 89.6                 | 70.5        | 18.9        | 25.2                 | 71.2        | 14.4        | 69.7        |
|           | Aug. DRAEM Zavrtanik et al. (2021) | 50.9        | 45.9        | 61.3                 | 44.0        | 0.2         | 0.4                  | 13.6        | 0.2         | 33.6        |
|           | SimpleNet Liu et al. (2023)        | 54.9        | 50.6        | 61.5                 | 76.1        | 1.9         | 4.9                  | 42.4        | 2.5         | 43.5        |
|           | Emb. CFA Lee et al. (2022)         | 55.7        | 50.5        | 61.9                 | 81.3        | 1.6         | 3.8                  | 48.8        | 2.0         | 45.0        |
|           | CFLOW-AD Gudovskiy et al. (2022)   | 77.0        | 75.8        | 69.9                 | 94.8        | 17.6        | 21.7                 | 80.4        | 12.4        | 63.9        |
| Avg       | PyramidalFlow Lei et al. (2023)    | 54.4        | 48.0        | 62.0                 | 71.1        | 1.2         | 1.1                  | 34.9        | 0.5         | 40.9        |
|           | Rec. RD Deng & Li (2022)           | 82.7        | 79.3        | 74.1                 | 97.2        | 25.2        | 32.8                 | 90.0        | 20.0        | 70.0        |
|           | DiAD He et al. (2024b)             | 75.6        | 66.4        | 69.9                 | 88.0        | 2.9         | 7.1                  | 58.1        | 3.7         | 52.6        |
|           | ViTAD Zhang et al. (2023a)         | 82.7        | 80.2        | 73.7                 | 97.2        | 24.3        | 32.3                 | 84.8        | 19.6        | 69.3        |
|           | InvAD Zhang et al. (2024a)         | <b>89.4</b> | <b>87.0</b> | <b>80.2</b>          | 98.4        | 32.6        | 38.9                 | <b>92.7</b> | 24.6        | <b>75.6</b> |
|           | InvAD-lite Zhang et al. (2024a)    | 87.2        | 85.2        | 77.8                 | 98.0        | 31.7        | 37.9                 | 92.0        | 23.8        | 74.2        |
|           | MambaAD He et al. (2024a)          | 87.0        | 85.3        | 77.6                 | <b>98.6</b> | 32.4        | 38.1                 | 91.2        | 23.9        | 74.2        |
|           | Hybrid UniAD You et al. (2022)     | 83.1        | 81.2        | 74.5                 | 97.4        | 23.3        | 30.9                 | 87.1        | 18.6        | 69.6        |
|           | RD++ Tien et al. (2023)            | 83.6        | 80.6        | 74.8                 | 97.7        | 25.9        | 33.6                 | 90.7        | 20.5        | 70.8        |
|           | DesTSeg Zhang et al. (2023c)       | 79.3        | 76.7        | 70.7                 | 80.3        | <b>36.9</b> | <b>40.3</b>          | 56.1        | <b>26.2</b> | 64.5        |

## M DETAILED QUANTITATIVE RESULTS ON COCO-AD DATASET UNDER 100 EPOCHS

Table A54: Benchmarked results on COCO-AD dataset [Zhang et al. \(2024a\)](#) by the suggested metrics in Sec. 3.3.

|   | Method | Image-level                                      |             |                      | Pixel-level |             |                      | mAU-PRO     | mIoU-max    | mAD         |
|---|--------|--------------------------------------------------|-------------|----------------------|-------------|-------------|----------------------|-------------|-------------|-------------|
|   |        | mAU-ROC                                          | mAP         | mF <sub>1</sub> -max | mAU-ROC     | mAP         | mF <sub>1</sub> -max |             |             |             |
| 0 | Aug.   | DRAEM <a href="#">Zavrtanik et al. (2021)</a>    | 48.8        | 74.5                 | 85.0        | 51.9        | 16.6                 | 27.7        | 18.1        | 49.0        |
|   |        | SimpleNet <a href="#">Liu et al. (2023)</a>      | 63.4        | 82.1                 | 85.0        | 78.2        | 39.1                 | 44.6        | 44.4        | 64.2        |
|   |        | CFA <a href="#">Lee et al. (2022)</a>            | 52.1        | 76.1                 | 85.0        | 59.3        | 22.2                 | 29.6        | 19.4        | 51.8        |
|   |        | CFLOW-AD <a href="#">Gudovskiy et al. (2022)</a> | 80.2        | 91.2                 | 87.1        | 81.9        | 46.4                 | 48.9        | 51.8        | 71.7        |
|   |        | PyramidalFlow <a href="#">Lei et al. (2023)</a>  | 48.5        | 73.3                 | 85.0        | 50.0        | 8.1                  | 27.7        | 15.0        | 47.1        |
|   | Emb.   | RD <a href="#">Deng &amp; Li (2022)</a>          | 65.7        | 82.0                 | 85.0        | 72.0        | 30.8                 | 38.3        | 47.9        | 62.4        |
|   |        | DiAD <a href="#">He et al. (2024b)</a>           | 57.5        | 77.5                 | 85.3        | 67.0        | 33.4                 | 26.2        | 28.8        | 53.7        |
|   |        | ViTAD <a href="#">Zhang et al. (2023a)</a>       | <b>84.8</b> | <b>93.9</b>          | <b>88.0</b> | <b>83.1</b> | <b>55.3</b>          | <b>53.2</b> | 51.0        | <b>74.8</b> |
|   |        | InvAD <a href="#">Zhang et al. (2024a)</a>       | 74.3        | 88.1                 | 85.1        | 78.0        | 41.6                 | 44.6        | <b>52.3</b> | 68.3        |
|   |        | InvAD-lite <a href="#">Zhang et al. (2024a)</a>  | 75.7        | 89.7                 | 85.3        | 76.6        | 40.8                 | 43.0        | 47.8        | 67.8        |
|   |        | MambaAD <a href="#">He et al. (2024a)</a>        | 74.0        | 88.9                 | 85.2        | 75.4        | 38.2                 | 41.5        | 48.9        | 66.9        |
|   | Rec.   | UniAD <a href="#">You et al. (2022)</a>          | 66.2        | 84.5                 | 85.1        | 70.4        | 29.3                 | 36.7        | 39.8        | 61.3        |
|   |        | RD++ <a href="#">Tien et al. (2023)</a>          | 70.3        | 85.4                 | 85.1        | 74.9        | 34.9                 | 41.1        | 50.3        | 65.3        |
|   |        | DesTSeg <a href="#">Zhang et al. (2023c)</a>     | 57.1        | 77.4                 | 85.0        | 54.2        | 21.2                 | 27.7        | 28.2        | 53.0        |
|   | Hybrid | DRAEM <a href="#">Zavrtanik et al. (2021)</a>    | 47.4        | 42.7                 | 60.9        | 48.1        | 2.4                  | 5.8         | 13.6        | 33.9        |
|   |        | SimpleNet <a href="#">Liu et al. (2023)</a>      | 45.0        | 39.8                 | 60.9        | 53.3        | 3.5                  | 6.5         | 19.3        | 34.6        |
| 1 | Aug.   | CFA <a href="#">Lee et al. (2022)</a>            | 52.4        | 44.8                 | 61.0        | 56.6        | 3.4                  | 6.9         | 13.1        | 36.4        |
|   |        | CFLOW-AD <a href="#">Gudovskiy et al. (2022)</a> | <b>59.5</b> | <b>50.0</b>          | <b>61.7</b> | 76.1        | 8.2                  | 14.2        | <b>46.4</b> | 46.6        |
|   |        | PyramidalFlow <a href="#">Lei et al. (2023)</a>  | 52.4        | 45.7                 | 60.9        | 50.1        | <b>19.5</b>          | 5.8         | 15.0        | 37.8        |
|   | Emb.   | RD <a href="#">Deng &amp; Li (2022)</a>          | 54.6        | 46.3                 | 61.0        | 70.1        | 5.9                  | 10.7        | 40.9        | 42.9        |
|   |        | DiAD <a href="#">He et al. (2024b)</a>           | 54.4        | 49.8                 | <b>62.2</b> | 71.3        | 11.8                 | 7.8         | 28.8        | 6.2         |
|   |        | ViTAD <a href="#">Zhang et al. (2023a)</a>       | 58.5        | <b>51.2</b>          | 61.8        | <b>78.9</b> | <b>16.3</b>          | <b>23.4</b> | 38.1        | <b>13.3</b> |
|   |        | InvAD <a href="#">Zhang et al. (2024a)</a>       | 55.7        | 47.9                 | 61.0        | 73.4        | 7.9                  | 13.4        | 43.0        | 7.2         |
|   |        | InvAD-lite <a href="#">Zhang et al. (2024a)</a>  | 54.0        | 47.0                 | 61.1        | 71.9        | 7.3                  | 12.2        | 36.6        | 6.5         |
|   |        | MambaAD <a href="#">He et al. (2024a)</a>        | 54.9        | 47.7                 | 61.0        | 70.8        | 6.2                  | 11.0        | 38.4        | 5.8         |
|   | Rec.   | UniAD <a href="#">You et al. (2022)</a>          | 55.9        | 47.8                 | 61.0        | 69.1        | 5.9                  | 10.4        | 37.3        | 5.5         |
|   |        | RD++ <a href="#">Tien et al. (2023)</a>          | 55.8        | 46.6                 | 61.1        | 69.2        | 6.2                  | 8.8         | 41.1        | 4.6         |
|   |        | DesTSeg <a href="#">Zhang et al. (2023c)</a>     | 54.2        | 47.0                 | 61.1        | 59.1        | 5.3                  | 9.6         | 29.5        | 5.0         |
|   | Hybrid | DRAEM <a href="#">Zavrtanik et al. (2021)</a>    | 58.1        | 37.0                 | 51.0        | 50.4        | 5.6                  | 11.9        | 15.2        | 6.3         |
|   |        | SimpleNet <a href="#">Liu et al. (2023)</a>      | 55.3        | 36.8                 | 49.9        | 55.7        | 7.8                  | 12.9        | 22.7        | 6.9         |
|   | Aug.   | CFA <a href="#">Lee et al. (2022)</a>            | 62.2        | 42.3                 | 51.6        | 60.4        | 9.2                  | 15.1        | 26.8        | 8.2         |
|   |        | CFLOW-AD <a href="#">Gudovskiy et al. (2022)</a> | 65.5        | 44.8                 | 53.7        | 75.8        | 14.0                 | 22.8        | 46.1        | 12.9        |
| 2 |        | PyramidalFlow <a href="#">Lei et al. (2023)</a>  | 50.2        | 32.4                 | 49.4        | 50.0        | 9.4                  | 11.9        | 15.0        | 6.3         |
|   | Emb.   | RD <a href="#">Deng &amp; Li (2022)</a>          | 58.6        | 37.3                 | 50.9        | 67.3        | 11.3                 | 17.3        | 40.7        | 9.5         |
|   |        | DiAD <a href="#">He et al. (2024b)</a>           | 63.8        | 43.4                 | 52.5        | 68.0        | 19.2                 | 12.2        | 33.2        | 10.6        |
|   |        | ViTAD <a href="#">Zhang et al. (2023a)</a>       | <b>67.5</b> | <b>53.9</b>          | 52.6        | <b>80.5</b> | <b>28.9</b>          | <b>35.9</b> | 40.2        | <b>21.9</b> |
|   |        | InvAD <a href="#">Zhang et al. (2024a)</a>       | 66.5        | 45.8                 | <b>54.4</b> | 73.5        | 15.5                 | 23.5        | <b>49.5</b> | 13.3        |
|   |        | InvAD-lite <a href="#">Zhang et al. (2024a)</a>  | 67.4        | 48.9                 | 53.7        | 72.1        | 16.2                 | 23.0        | 43.1        | 13.0        |
|   |        | MambaAD <a href="#">He et al. (2024a)</a>        | 65.2        | 45.3                 | 53.3        | 70.9        | 13.9                 | 21.4        | 45.0        | 12.0        |
|   | Rec.   | UniAD <a href="#">You et al. (2022)</a>          | 48.8        | 31.6                 | 49.5        | 60.0        | 7.6                  | 14.6        | 27.9        | 7.9         |
|   |        | RD++ <a href="#">Tien et al. (2023)</a>          | 51.5        | 31.0                 | 50.3        | 70.3        | 12.7                 | 16.9        | 43.5        | 9.2         |
|   |        | DesTSeg <a href="#">Zhang et al. (2023c)</a>     | 56.6        | 37.8                 | 50.0        | 53.8        | 8.8                  | 11.9        | 22.3        | 6.3         |
|   | Hybrid | DRAEM <a href="#">Zavrtanik et al. (2021)</a>    | 59.6        | 39.8                 | 53.3        | 49.1        | 5.8                  | 12.4        | 14.3        | 6.6         |
|   |        | SimpleNet <a href="#">Liu et al. (2023)</a>      | 58.6        | 38.7                 | 53.4        | 53.7        | 7.5                  | 12.9        | 18.0        | 6.9         |
|   | Aug.   | CFA <a href="#">Lee et al. (2022)</a>            | 60.0        | 41.5                 | 52.9        | 48.4        | 6.4                  | 12.4        | 12.2        | 6.6         |
|   |        | CFLOW-AD <a href="#">Gudovskiy et al. (2022)</a> | <b>65.5</b> | <b>45.7</b>          | <b>55.5</b> | <b>70.1</b> | <b>12.6</b>          | <b>19.7</b> | <b>46.3</b> | <b>10.9</b> |
|   |        | PyramidalFlow <a href="#">Lei et al. (2023)</a>  | 55.2        | 38.1                 | 51.2        | 50.0        | 16.7                 | 12.4        | 15.0        | 6.6         |
| 3 | Emb.   | RD <a href="#">Deng &amp; Li (2022)</a>          | 51.4        | 34.1                 | 51.3        | 56.7        | 7.8                  | 13.7        | 29.7        | 7.4         |
|   |        | DiAD <a href="#">He et al. (2024b)</a>           | 60.1        | 41.4                 | 52.9        | 65.9        | <b>17.5</b>          | 10.6        | 32.3        | 9.6         |
|   |        | ViTAD <a href="#">Zhang et al. (2023a)</a>       | 56.6        | 38.2                 | 52.3        | 62.3        | 10.0                 | 16.4        | 27.1        | 9.0         |
|   |        | InvAD <a href="#">Zhang et al. (2024a)</a>       | 60.2        | 42.0                 | 53.1        | 59.7        | 9.0                  | 14.9        | 38.5        | 8.0         |
|   |        | InvAD-lite <a href="#">Zhang et al. (2024a)</a>  | 56.2        | 38.6                 | 51.6        | 59.1        | 8.6                  | 14.3        | 31.3        | 7.7         |
|   |        | MambaAD <a href="#">He et al. (2024a)</a>        | 57.1        | 38.9                 | 51.5        | 58.6        | 8.5                  | 14.2        | 34.0        | 7.6         |
|   | Rec.   | UniAD <a href="#">You et al. (2022)</a>          | 49.9        | 33.2                 | 51.3        | 59.0        | 8.2                  | 14.4        | 32.1        | 7.8         |
|   |        | RD++ <a href="#">Tien et al. (2023)</a>          | 52.5        | 34.3                 | 51.6        | 58.5        | 8.3                  | 13.5        | 33.7        | 7.3         |
|   |        | DesTSeg <a href="#">Zhang et al. (2023c)</a>     | 49.8        | 35.3                 | 51.1        | 50.8        | 7.2                  | 12.4        | 17.6        | 6.6         |
|   | Hybrid |                                                  |             |                      |             |             |                      |             |             |             |



Table A55: Benchmarked results on COCO-AD dataset [Zhang et al. \(2024a\)](#) by the suggested metrics in [Sec. 3.3](#).

|     | Method | Image-level                                      |             |                      | Pixel-level |             |                      | mAU-PRO     | mIoU-max    | mAD         |
|-----|--------|--------------------------------------------------|-------------|----------------------|-------------|-------------|----------------------|-------------|-------------|-------------|
|     |        | mAU-ROC                                          | mAP         | mF <sub>1</sub> -max | mAU-ROC     | mAP         | mF <sub>1</sub> -max |             |             |             |
| Avg | Aug.   | DRAEM <a href="#">Zavrtanik et al. (2021)</a>    | 53.5        | 48.5                 | 62.5        | 49.9        | 7.6                  | 14.4        | 15.3        | 38.3        |
|     |        | SimpleNet <a href="#">Liu et al. (2023)</a>      | 55.6        | 49.4                 | 62.3        | 60.2        | 14.5                 | 19.2        | 26.1        | 42.9        |
|     |        | CFA <a href="#">Lee et al. (2022)</a>            | 56.7        | 51.2                 | 62.6        | 56.2        | 10.3                 | 16.0        | 17.9        | 41.0        |
|     | Emb.   | CFLOW-AD <a href="#">Gudovskiy et al. (2022)</a> | <b>67.7</b> | <b>57.9</b>          | <b>64.5</b> | <b>76.0</b> | <b>20.3</b>          | <b>26.4</b> | <b>47.7</b> | <b>53.0</b> |
|     |        | PyramidalFlow <a href="#">Lei et al. (2023)</a>  | 51.6        | 47.4                 | 61.6        | 50.0        | 13.4                 | 14.4        | 15.0        | 38.4        |
|     |        | RD <a href="#">Deng &amp; Li (2022)</a>          | 57.6        | 49.9                 | 62.0        | 66.5        | 13.9                 | 20.0        | 39.8        | 45.8        |
|     | Rec.   | DiAD <a href="#">He et al. (2024b)</a>           | 59.0        | 53.0                 | 63.2        | 68.1        | 20.5                 | 14.2        | 30.8        | 44.1        |
|     |        | ViTAD <a href="#">Zhang et al. (2023a)</a>       | 66.9        | <b>59.3</b>          | 63.7        | <b>76.2</b> | <b>27.6</b>          | <b>32.2</b> | 39.1        | <b>20.1</b> |
|     |        | InvAD <a href="#">Zhang et al. (2024a)</a>       | 64.2        | 56.0                 | 63.4        | 71.2        | 18.5                 | 24.1        | 45.8        | 50.5        |
|     |        | InvAD-lite <a href="#">Zhang et al. (2024a)</a>  | 63.3        | 56.0                 | 62.9        | 69.9        | 18.2                 | 23.1        | 39.7        | 49.2        |
|     |        | MambaAD <a href="#">He et al. (2024a)</a>        | 62.8        | 55.2                 | 62.8        | 68.9        | 16.7                 | 22.0        | 41.6        | 48.8        |
|     |        | UniAD <a href="#">You et al. (2022)</a>          | 55.2        | 49.3                 | 61.7        | 64.6        | 12.8                 | 19.0        | 34.3        | 44.0        |
|     | Hybrid | RD++ <a href="#">Tien et al. (2023)</a>          | 57.5        | 49.3                 | 62.0        | 68.2        | 15.5                 | 20.1        | 42.2        | 46.4        |
|     |        | DesTSeg <a href="#">Zhang et al. (2023c)</a>     | 54.4        | 49.4                 | 61.8        | 54.5        | 10.6                 | 15.4        | 24.4        | 40.7        |

## N DETAILED QUANTITATIVE RESULTS ON MVTEC AD DATASET UNDER 300 EPOCHS

Table A56: Benchmarked results on MVTEC AD dataset [Bergmann et al. \(2019\)](#) by the suggested metrics in Sec. 3.3.

|         | Method | Image-level                                      |             |                      | Pixel-level |             |                      | mAU-PRO     | mIoU-max    | mAD         |
|---------|--------|--------------------------------------------------|-------------|----------------------|-------------|-------------|----------------------|-------------|-------------|-------------|
|         |        | mAU-ROC                                          | mAP         | mF <sub>1</sub> -max | mAU-ROC     | mAP         | mF <sub>1</sub> -max |             |             |             |
| bottle  | Aug.   | DRAEM <a href="#">Zavrtanik et al. (2021)</a>    | 42.8        | 73.8                 | 86.3        | 55.0        | 6.2                  | 11.3        | 15.8        | 44.9        |
|         |        | SimpleNet <a href="#">Liu et al. (2023)</a>      | 85.4        | 95.6                 | 87.6        | 80.8        | 21.9                 | 26.6        | 50.7        | 67.3        |
|         |        | RealNet <a href="#">Zhang et al. (2024c)</a>     | 98.7        | 99.6                 | 96.9        | 72.5        | 60.5                 | 53.4        | 61.5        | 80.2        |
|         | Emb.   | CFA <a href="#">Lee et al. (2022)</a>            | 36.7        | 71.5                 | 86.3        | 23.6        | 3.5                  | 10.9        | 2.4         | 37.5        |
|         |        | PatchCore <a href="#">Roth et al. (2022)</a>     | <b>100.</b> | <b>100.</b>          | <b>100.</b> | <b>98.9</b> | 79.0                 | <u>77.1</u> | 96.1        | <u>62.7</u> |
|         |        | CFLOW-AD <a href="#">Gudovskiy et al. (2022)</a> | 99.9        | <b>100.</b>          | 99.2        | 97.3        | 62.3                 | 63.9        | 92.1        | 47.0        |
|         |        | PyramidalFlow <a href="#">Lei et al. (2023)</a>  | 75.1        | 91.3                 | 86.9        | 54.8        | 7.4                  | 11.8        | 17.9        | 6.3         |
|         |        | RD <a href="#">Deng &amp; Li (2022)</a>          | 99.6        | <u>99.9</u>          | <u>98.4</u> | 97.8        | 68.0                 | 67.9        | 94.6        | 51.5        |
|         | Rec.   | DiAD <a href="#">He et al. (2024b)</a>           | 97.8        | 99.1                 | <u>99.2</u> | 93.5        | 45.9                 | 49.4        | 75.9        | 32.8        |
|         |        | ViTAD <a href="#">Zhang et al. (2023a)</a>       | <b>100.</b> | <b>100.</b>          | <b>100.</b> | <u>98.8</u> | <u>80.0</u>          | <u>75.3</u> | 94.7        | 60.4        |
|         |        | InvAD <a href="#">Zhang et al. (2024a)</a>       | <b>100.</b> | <b>100.</b>          | <b>100.</b> | 98.4        | 74.8                 | 72.2        | 95.2        | 56.6        |
|         |        | InvAD-lite <a href="#">Zhang et al. (2024a)</a>  | <b>100.</b> | <b>100.</b>          | <b>100.</b> | 98.4        | 74.8                 | 73.2        | 95.5        | 57.7        |
|         |        | MambaAD <a href="#">He et al. (2024a)</a>        | <b>100.</b> | <b>100.</b>          | <b>100.</b> | <b>98.9</b> | 80.3                 | <u>77.1</u> | <b>96.2</b> | 62.7        |
|         | Hybrid | UniAD <a href="#">You et al. (2022)</a>          | 99.8        | <b>100.</b>          | 99.2        | 98.0        | 68.9                 | 69.8        | 94.5        | 53.6        |
|         |        | RD++ <a href="#">Tien et al. (2023)</a>          | 99.8        | <b>100.</b>          | 99.2        | 98.2        | 71.0                 | 71.3        | 94.8        | 55.4        |
|         |        | DesTSeg <a href="#">Zhang et al. (2023c)</a>     | <b>100.</b> | <b>100.</b>          | <b>100.</b> | 95.7        | <b>88.0</b>          | <b>80.8</b> | 92.6        | <b>67.8</b> |
|         | Aug.   | DRAEM <a href="#">Zavrtanik et al. (2021)</a>    | 53.6        | 66.2                 | 76.0        | 52.4        | 2.7                  | 5.6         | 14.7        | 2.9         |
|         |        | SimpleNet <a href="#">Liu et al. (2023)</a>      | 71.3        | 81.6                 | 77.1        | 76.8        | 13.0                 | 18.2        | 51.5        | 10.0        |
|         |        | RealNet <a href="#">Zhang et al. (2024c)</a>     | 63.3        | 80.1                 | 76.0        | 59.8        | 29.4                 | 26.6        | 29.1        | 15.3        |
|         | Emb.   | CFA <a href="#">Lee et al. (2022)</a>            | 56.4        | 71.8                 | 76.0        | 57.1        | 7.4                  | 8.1         | 16.3        | 4.2         |
|         |        | PatchCore <a href="#">Roth et al. (2022)</a>     | <b>99.8</b> | <b>99.9</b>          | <b>99.5</b> | <b>97.7</b> | 51.6                 | <u>55.2</u> | <b>93.6</b> | 38.1        |
|         |        | CFLOW-AD <a href="#">Gudovskiy et al. (2022)</a> | 90.3        | 94.1                 | 88.2        | 89.9        | 27.7                 | 33.8        | 79.4        | 20.3        |
|         |        | PyramidalFlow <a href="#">Lei et al. (2023)</a>  | 59.6        | 75.3                 | 76.3        | 74.7        | 17.9                 | 17.8        | 37.5        | 9.8         |
|         |        | RD <a href="#">Deng &amp; Li (2022)</a>          | 81.9        | 88.4                 | 80.6        | 84.9        | 25.9                 | 33.0        | 76.8        | 19.8        |
|         | Rec.   | DiAD <a href="#">He et al. (2024b)</a>           | 85.9        | 92.4                 | 85.7        | 90.8        | 27.2                 | 33.0        | 64.4        | 19.8        |
|         |        | ViTAD <a href="#">Zhang et al. (2023a)</a>       | 98.8        | 99.2                 | <u>96.3</u> | 95.4        | 41.0                 | 45.0        | 88.9        | 29.1        |
|         |        | InvAD <a href="#">Zhang et al. (2024a)</a>       | <u>99.2</u> | <u>99.5</u>          | <u>96.8</u> | <u>97.3</u> | 47.0                 | <u>51.1</u> | <u>92.1</u> | 34.3        |
|         |        | InvAD-lite <a href="#">Zhang et al. (2024a)</a>  | 96.3        | 97.7                 | 92.6        | 90.2        | 36.9                 | 45.7        | 86.5        | 29.6        |
|         |        | MambaAD <a href="#">He et al. (2024a)</a>        | 98.9        | 99.3                 | 95.6        | 95.9        | 42.6                 | 48.0        | 90.9        | 31.6        |
|         | Hybrid | UniAD <a href="#">You et al. (2022)</a>          | 96.6        | 98.0                 | 91.8        | <u>97.0</u> | <u>49.3</u>          | <u>55.2</u> | 86.6        | <u>38.2</u> |
|         |        | RD++ <a href="#">Tien et al. (2023)</a>          | 94.5        | 96.3                 | 91.6        | 93.7        | 37.2                 | 44.5        | 86.4        | 28.6        |
|         |        | DesTSeg <a href="#">Zhang et al. (2023c)</a>     | 93.0        | 96.2                 | 88.3        | 92.2        | <b>62.8</b>          | <b>62.3</b> | 70.9        | <b>45.3</b> |
| capsule | Aug.   | DRAEM <a href="#">Zavrtanik et al. (2021)</a>    | 41.4        | 81.7                 | 90.5        | 47.9        | 1.1                  | 1.8         | 17.6        | 0.9         |
|         |        | SimpleNet <a href="#">Liu et al. (2023)</a>      | 73.6        | 92.1                 | 91.1        | 93.4        | 19.8                 | 26.6        | 77.1        | 15.3        |
|         |        | RealNet <a href="#">Zhang et al. (2024c)</a>     | 51.0        | 85.4                 | 90.5        | 51.8        | 23.3                 | 5.7         | 18.8        | 2.9         |
|         | Emb.   | CFA <a href="#">Lee et al. (2022)</a>            | 40.2        | 79.1                 | 90.5        | 81.8        | 4.0                  | 8.4         | 56.0        | 4.4         |
|         |        | PatchCore <a href="#">Roth et al. (2022)</a>     | <b>99.2</b> | <b>99.8</b>          | <b>98.6</b> | <b>99.0</b> | 49.0                 | <u>52.9</u> | 95.7        | <u>35.9</u> |
|         |        | CFLOW-AD <a href="#">Gudovskiy et al. (2022)</a> | 87.8        | 97.2                 | 93.4        | 89.5        | 39.9                 | 43.7        | 93.3        | 28.0        |
|         |        | PyramidalFlow <a href="#">Lei et al. (2023)</a>  | 54.6        | 87.9                 | 90.5        | 89.5        | 9.1                  | 15.1        | 55.7        | 8.2         |
|         |        | RD <a href="#">Deng &amp; Li (2022)</a>          | <u>98.2</u> | 99.6                 | 96.9        | 98.8        | 44.2                 | 50.4        | <b>96.0</b> | 33.7        |
|         | Rec.   | DiAD <a href="#">He et al. (2024b)</a>           | 97.9        | <u>99.6</u>          | <u>97.3</u> | 90.3        | 16.2                 | 23.1        | 54.2        | 13.0        |
|         |        | ViTAD <a href="#">Zhang et al. (2023a)</a>       | 95.8        | 99.1                 | 95.4        | 98.1        | 41.6                 | 47.5        | 92.2        | 31.2        |
|         |        | InvAD <a href="#">Zhang et al. (2024a)</a>       | <u>98.2</u> | <u>99.6</u>          | <u>96.9</u> | <b>99.0</b> | <u>47.5</u>          | 51.1        | 95.8        | 34.3        |
|         |        | InvAD-lite <a href="#">Zhang et al. (2024a)</a>  | 96.5        | 99.2                 | 96.8        | 98.6        | 43.9                 | 49.0        | 95.1        | 32.5        |
|         |        | MambaAD <a href="#">He et al. (2024a)</a>        | 94.8        | 98.9                 | 95.4        | 98.4        | 43.8                 | 47.1        | 93.9        | 30.8        |
|         | Hybrid | UniAD <a href="#">You et al. (2022)</a>          | 87.5        | 96.9                 | 93.5        | 98.7        | 45.6                 | 48.5        | 92.5        | 32.0        |
|         |        | RD++ <a href="#">Tien et al. (2023)</a>          | 97.6        | <u>99.5</u>          | 96.8        | <u>98.8</u> | 45.4                 | <u>51.2</u> | <u>95.7</u> | 34.4        |
|         |        | DesTSeg <a href="#">Zhang et al. (2023c)</a>     | 91.3        | 98.2                 | 93.4        | 86.0        | <b>57.5</b>          | <b>58.4</b> | 59.0        | <b>41.3</b> |
|         | Aug.   | DRAEM <a href="#">Zavrtanik et al. (2021)</a>    | 34.4        | 72.8                 | 86.4        | 50.2        | 1.6                  | 3.2         | 15.2        | 1.6         |
|         |        | SimpleNet <a href="#">Liu et al. (2023)</a>      | 88.8        | 96.7                 | 89.6        | 95.4        | 37.3                 | 44.0        | 80.9        | 28.2        |
|         |        | RealNet <a href="#">Zhang et al. (2024c)</a>     | 97.3        | 99.2                 | 96.1        | 87.8        | <b>73.0</b>          | <b>68.3</b> | 82.3        | <b>51.8</b> |
|         | Emb.   | CFA <a href="#">Lee et al. (2022)</a>            | 54.3        | 81.4                 | 86.4        | 41.0        | 3.1                  | 8.0         | 25.7        | 4.2         |
|         |        | PatchCore <a href="#">Roth et al. (2022)</a>     | 98.4        | 99.5                 | 97.8        | <u>99.1</u> | <u>66.4</u>          | <u>64.6</u> | 95.2        | <u>47.7</u> |
|         |        | CFLOW-AD <a href="#">Gudovskiy et al. (2022)</a> | 99.2        | 99.8                 | 98.3        | 98.9        | 59.0                 | 61.4        | 94.7        | 44.3        |
|         |        | PyramidalFlow <a href="#">Lei et al. (2023)</a>  | 56.7        | 80.3                 | 86.4        | 81.9        | 7.3                  | 14.9        | 49.0        | 8.0         |
|         |        | RD <a href="#">Deng &amp; Li (2022)</a>          | 98.4        | 99.5                 | 97.2        | 99.0        | 57.7                 | 60.1        | 95.6        | 42.9        |
|         | Rec.   | DiAD <a href="#">He et al. (2024b)</a>           | 91.3        | 97.6                 | 90.5        | 87.7        | 16.9                 | 26.6        | 65.5        | 15.4        |
|         |        | ViTAD <a href="#">Zhang et al. (2023a)</a>       | 99.4        | <u>99.8</u>          | <b>99.4</b> | 98.9        | 61.1                 | 64.2        | 94.3        | 47.3        |
|         |        | InvAD <a href="#">Zhang et al. (2024a)</a>       | 98.8        | <u>99.7</u>          | 97.2        | <u>99.1</u> | 60.9                 | 62.2        | <u>95.6</u> | 45.2        |
|         |        | InvAD-lite <a href="#">Zhang et al. (2024a)</a>  | 99.5        | 99.8                 | 98.9        | 99.0        | 55.6                 | 60.1        | <u>96.0</u> | 42.9        |
|         |        | MambaAD <a href="#">He et al. (2024a)</a>        | <b>99.9</b> | <b>100.</b>          | <b>99.4</b> | <b>99.2</b> | 62.7                 | 63.3        | <b>97.2</b> | 46.3        |
|         | Hybrid | UniAD <a href="#">You et al. (2022)</a>          | 99.8        | 99.9                 | <b>99.4</b> | 98.5        | 52.9                 | 52.6        | 95.2        | 35.7        |
|         |        | RD++ <a href="#">Tien et al. (2023)</a>          | 97.4        | 99.3                 | 96.6        | 98.8        | 52.1                 | 56.3        | 94.5        | 39.2        |
|         |        | DesTSeg <a href="#">Zhang et al. (2023c)</a>     | 93.6        | 97.9                 | 94.4        | 96.1        | <u>72.3</u>          | <u>67.5</u> | 94.2        | <u>50.9</u> |
| carpet  | Aug.   | DRAEM <a href="#">Zavrtanik et al. (2021)</a>    | 34.4        | 72.8                 | 86.4        | 50.2        | 1.6                  | 3.2         | 15.2        | 1.6         |
|         |        | SimpleNet <a href="#">Liu et al. (2023)</a>      | 88.8        | 96.7                 | 89.6        | 95.4        | 37.3                 | 44.0        | 80.9        | 28.2        |
|         |        | RealNet <a href="#">Zhang et al. (2024c)</a>     | 97.3        | 99.2                 | 96.1        | 87.8        | <b>73.0</b>          | <b>68.3</b> | 82.3        | <b>51.8</b> |
|         | Emb.   | CFA <a href="#">Lee et al. (2022)</a>            | 54.3        | 81.4                 | 86.4        | 41.0        | 3.1                  | 8.0         | 25.7        | 4.2         |
|         |        | PatchCore <a href="#">Roth et al. (2022)</a>     | 98.4        | 99.5                 | 97.8        | <u>99.1</u> | <u>66.4</u>          | <u>64.6</u> | 95.2        | <u>47.7</u> |
|         |        | CFLOW-AD <a href="#">Gudovskiy et al. (2022)</a> | 99.2        | 99.8                 | 98.3        | 98.9        | 59.0                 | 61.4        | 94.7        | 44.3        |
|         |        | PyramidalFlow <a href="#">Lei et al. (2023)</a>  | 56.7        | 80.3                 | 86.4        | 81.9        | 7.3                  | 14.9        | 49.0        | 8.0         |
|         |        | RD <a href="#">Deng &amp; Li (2022)</a>          | 98.4        | 99.5                 | 97.2        | 99.0        | 57.7                 | 60.1        | 95.6        | 42.9        |
|         | Rec.   | DiAD <a href="#">He et al. (2024b)</a>           | 91.3        | 97.6                 | 90.5        | 87.7        | 16.9                 | 26.6        | 65.5        | 15.4        |
|         |        | ViTAD <a href="#">Zhang et al. (2023a)</a>       | 99.4        | <u>99.8</u>          | <b>99.4</b> | 98.9        | 61.1                 | 64.2        | 94.3        | 47.3        |
|         |        | InvAD <a href="#">Zhang et al. (2024a)</a>       | 98.8        | <u>99.7</u>          | 97.2        | <u>99.1</u> | 60.9                 | 62.2        | <u>95.6</u> | 45.2        |
|         |        | InvAD-lite <a href="#">Zhang et al. (2024a)</a>  | 99.5        | 99.8                 | 98.9        | 99.0        | 55.6                 | 60.1        | <u>96.0</u> | 42.9        |
|         |        | MambaAD <a href="#">He et al. (2024a)</a>        | <b>99.9</b> | <b>100.</b>          | <b>99.4</b> | <b>99.2</b> | 62.7                 | 63.3        | <b>97.2</b> | 46.3        |
|         | Hybrid | UniAD <a href="#">You et al. (2022)</a>          | 99.8        | 99.9                 | <b>99.4</b> | 98.5        | 52.9                 | 52.6        | 95.2        | 35.7        |
|         |        | RD++ <a href="#">Tien et al. (2023)</a>          | 97.4        | 99.3                 | 96.6        | 98.8        | 52.1                 | 56.3        | 94.5        | 39.2        |
|         |        | DesTSeg <a href="#">Zhang et al. (2023c)</a>     | 93.6        | 97.9                 | 94.4        | 96.1        | <u>72.3</u>          | <u>67.5</u> | 94.2        | <u>50.9</u> |

Table A57: Benchmarked results on MVTec AD dataset [Bergmann et al. \(2019\)](#) by the suggested metrics in Sec. 3.3.

|                                           | Method                                    | Image-level                                      |                                               |                      | Pixel-level |      |                      | mAU-PRO | mIoU-max | mAD  |      |      |
|-------------------------------------------|-------------------------------------------|--------------------------------------------------|-----------------------------------------------|----------------------|-------------|------|----------------------|---------|----------|------|------|------|
|                                           |                                           | mAU-ROC                                          | mAP                                           | mF <sub>1</sub> -max | mAU-ROC     | mAP  | mF <sub>1</sub> -max |         |          |      |      |      |
| grid                                      | Aug.                                      | DRAEM <a href="#">Zavrtanik et al. (2021)</a>    | 64.2                                          | 84.1                 | 85.5        | 49.3 | 0.6                  | 1.4     | 14.3     | 0.7  | 47.2 |      |
|                                           |                                           | SimpleNet <a href="#">Liu et al. (2023)</a>      | 40.5                                          | 69.4                 | 85.7        | 38.2 | 0.5                  | 1.4     | 3.6      | 0.7  | 38.1 |      |
|                                           |                                           | RealNet <a href="#">Zhang et al. (2024c)</a>     | 97.4                                          | 99.3                 | 98.2        | 81.0 | 47.8                 | 49.2    | 70.3     | 32.6 | 80.2 |      |
|                                           | Emb.                                      | CFA <a href="#">Lee et al. (2022)</a>            | 51.2                                          | 79.2                 | 85.1        | 27.5 | 0.4                  | 1.4     | 1.7      | 0.7  | 39.8 |      |
|                                           |                                           | PatchCore <a href="#">Roth et al. (2022)</a>     | 99.4                                          | 99.8                 | 98.2        | 98.9 | 40.8                 | 44.3    | 94.0     | 28.4 | 84.3 |      |
|                                           |                                           | CFLOW-AD <a href="#">Gudovskiy et al. (2022)</a> | 89.4                                          | 96.5                 | 88.9        | 93.6 | 21.3                 | 26.9    | 82.3     | 15.5 | 73.8 |      |
|                                           |                                           | PyramidalFlow <a href="#">Lei et al. (2023)</a>  | 78.4                                          | 90.2                 | 88.7        | 90.0 | 13.9                 | 22.4    | 75.5     | 12.6 | 68.1 |      |
|                                           | Rec.                                      | RD <a href="#">Deng &amp; Li (2022)</a>          | 97.8                                          | 99.3                 | 96.6        | 99.2 | 45.9                 | 47.6    | 97.3     | 31.2 | 85.2 |      |
|                                           |                                           | DiAD <a href="#">He et al. (2024b)</a>           | 99.7                                          | 99.9                 | 98.3        | 85.7 | 3.9                  | 9.7     | 57.4     | 5.1  | 65.0 |      |
|                                           |                                           | ViTAD <a href="#">Zhang et al. (2023a)</a>       | 99.6                                          | 99.9                 | 99.1        | 98.6 | 30.6                 | 36.6    | 95.8     | 22.4 | 82.5 |      |
|                                           |                                           | InvAD <a href="#">Zhang et al. (2024a)</a>       | 100.                                          | 100.                 | 100.        | 99.2 | 45.5                 | 47.3    | 97.3     | 31.0 | 86.2 |      |
|                                           |                                           | InvAD-lite <a href="#">Zhang et al. (2024a)</a>  | 100.                                          | 100.                 | 100.        | 99.3 | 50.0                 | 50.2    | 97.7     | 33.5 | 87.2 |      |
|                                           | MambaAD <a href="#">He et al. (2024a)</a> | 100.                                             | 100.                                          | 100.                 | 99.2        | 48.6 | 48.3                 | 97.6    | 31.8     | 86.7 |      |      |
|                                           | Hybrid                                    | UniAD <a href="#">You et al. (2022)</a>          | 98.8                                          | 99.6                 | 96.6        | 97.0 | 23.8                 | 30.0    | 92.1     | 17.6 | 79.5 |      |
|                                           |                                           | RD++ <a href="#">Tien et al. (2023)</a>          | 99.1                                          | 99.7                 | 98.2        | 99.1 | 43.7                 | 48.1    | 96.7     | 31.6 | 85.5 |      |
|                                           |                                           | DesTSeg <a href="#">Zhang et al. (2023c)</a>     | 99.8                                          | 99.9                 | 99.1        | 99.3 | 65.9                 | 64.9    | 97.8     | 48.0 | 90.8 |      |
|                                           | hazelnut                                  | Aug.                                             | DRAEM <a href="#">Zavrtanik et al. (2021)</a> | 51.0                 | 69.7        | 77.8 | 32.8                 | 2.2     | 4.2      | 11.2 | 2.1  | 39.4 |
|                                           |                                           |                                                  | SimpleNet <a href="#">Liu et al. (2023)</a>   | 93.0                 | 96.1        | 91.5 | 92.0                 | 24.7    | 33.0     | 81.2 | 19.8 | 75.6 |
|                                           |                                           |                                                  | RealNet <a href="#">Zhang et al. (2024c)</a>  | 99.4                 | 99.6        | 98.6 | 70.2                 | 47.1    | 44.9     | 64.3 | 29.0 | 77.9 |
| Emb.                                      |                                           | CFA <a href="#">Lee et al. (2022)</a>            | 66.1                                          | 79.8                 | 78.9        | 38.0 | 4.7                  | 8.1     | 26.7     | 4.2  | 47.2 |      |
|                                           |                                           | PatchCore <a href="#">Roth et al. (2022)</a>     | 100.                                          | 100.                 | 100.        | 99.0 | 61.2                 | 63.6    | 96.2     | 46.6 | 90.0 |      |
|                                           |                                           | CFLOW-AD <a href="#">Gudovskiy et al. (2022)</a> | 99.9                                          | 99.9                 | 99.3        | 98.5 | 59.9                 | 56.9    | 95.7     | 39.8 | 88.7 |      |
|                                           |                                           | PyramidalFlow <a href="#">Lei et al. (2023)</a>  | 88.5                                          | 93.6                 | 87.7        | 88.1 | 31.8                 | 39.3    | 75.5     | 24.5 | 74.3 |      |
| Rec.                                      |                                           | RD <a href="#">Deng &amp; Li (2022)</a>          | 100.                                          | 100.                 | 100.        | 98.6 | 58.3                 | 59.3    | 96.4     | 42.1 | 89.1 |      |
|                                           |                                           | DiAD <a href="#">He et al. (2024b)</a>           | 96.6                                          | 98.5                 | 96.3        | 95.3 | 27.9                 | 37.2    | 81.0     | 22.9 | 76.1 |      |
|                                           |                                           | ViTAD <a href="#">Zhang et al. (2023a)</a>       | 99.8                                          | 99.9                 | 98.6        | 98.9 | 64.1                 | 62.6    | 95.2     | 45.5 | 89.8 |      |
|                                           |                                           | InvAD <a href="#">Zhang et al. (2024a)</a>       | 100.                                          | 100.                 | 100.        | 98.9 | 58.7                 | 60.3    | 96.6     | 43.2 | 89.3 |      |
|                                           |                                           | InvAD-lite <a href="#">Zhang et al. (2024a)</a>  | 100.                                          | 100.                 | 100.        | 98.8 | 58.1                 | 60.9    | 95.6     | 43.8 | 89.2 |      |
| MambaAD <a href="#">He et al. (2024a)</a> |                                           | 100.                                             | 100.                                          | 100.                 | 99.0        | 64.8 | 65.6                 | 95.8    | 48.8     | 90.7 |      |      |
| Hybrid                                    |                                           | UniAD <a href="#">You et al. (2022)</a>          | 99.9                                          | 100.                 | 99.3        | 98.1 | 53.5                 | 55.2    | 94.6     | 38.1 | 87.5 |      |
|                                           |                                           | RD++ <a href="#">Tien et al. (2023)</a>          | 93.4                                          | 94.0                 | 94.6        | 98.7 | 57.1                 | 58.0    | 96.4     | 40.9 | 85.8 |      |
|                                           |                                           | DesTSeg <a href="#">Zhang et al. (2023c)</a>     | 99.7                                          | 99.8                 | 99.3        | 97.9 | 90.2                 | 84.2    | 90.5     | 72.7 | 95.2 |      |
| leather                                   |                                           | Aug.                                             | DRAEM <a href="#">Zavrtanik et al. (2021)</a> | 80.3                 | 91.5        | 87.8 | 48.8                 | 0.8     | 1.3      | 16.7 | 0.7  | 51.7 |
|                                           |                                           |                                                  | SimpleNet <a href="#">Liu et al. (2023)</a>   | 87.3                 | 95.2        | 90.1 | 82.2                 | 5.3     | 11.7     | 74.6 | 6.2  | 67.2 |
|                                           |                                           |                                                  | RealNet <a href="#">Zhang et al. (2024c)</a>  | 100.                 | 100.        | 100. | 95.8                 | 73.8    | 70.4     | 93.9 | 54.3 | 91.7 |
|                                           | Emb.                                      | CFA <a href="#">Lee et al. (2022)</a>            | 58.1                                          | 80.3                 | 86.7        | 23.7 | 0.4                  | 1.3     | 1.7      | 0.6  | 40.9 |      |
|                                           |                                           | PatchCore <a href="#">Roth et al. (2022)</a>     | 100.                                          | 100.                 | 100.        | 99.4 | 52.1                 | 51.2    | 97.8     | 34.5 | 87.6 |      |
|                                           |                                           | CFLOW-AD <a href="#">Gudovskiy et al. (2022)</a> | 100.                                          | 100.                 | 100.        | 99.3 | 48.8                 | 49.0    | 98.3     | 32.4 | 86.9 |      |
|                                           |                                           | PyramidalFlow <a href="#">Lei et al. (2023)</a>  | 39.1                                          | 65.1                 | 87.2        | 47.9 | 0.3                  | 1.3     | 11.6     | 0.6  | 39.5 |      |
|                                           | Rec.                                      | RD <a href="#">Deng &amp; Li (2022)</a>          | 100.                                          | 100.                 | 100.        | 99.3 | 38.2                 | 45.4    | 97.8     | 29.4 | 85.1 |      |
|                                           |                                           | DiAD <a href="#">He et al. (2024b)</a>           | 97.4                                          | 99.0                 | 96.8        | 91.5 | 6.4                  | 13.3    | 77.9     | 7.1  | 68.9 |      |
|                                           |                                           | ViTAD <a href="#">Zhang et al. (2023a)</a>       | 100.                                          | 100.                 | 100.        | 99.5 | 51.3                 | 55.4    | 98.0     | 38.3 | 88.0 |      |
|                                           |                                           | InvAD <a href="#">Zhang et al. (2024a)</a>       | 100.                                          | 100.                 | 100.        | 99.4 | 49.9                 | 52.1    | 97.9     | 35.2 | 87.4 |      |
|                                           |                                           | InvAD-lite <a href="#">Zhang et al. (2024a)</a>  | 100.                                          | 100.                 | 100.        | 99.2 | 41.2                 | 46.4    | 98.4     | 30.2 | 85.7 |      |
|                                           | MambaAD <a href="#">He et al. (2024a)</a> | 100.                                             | 100.                                          | 100.                 | 99.3        | 47.7 | 50.1                 | 98.6    | 33.4     | 87.0 |      |      |
|                                           | Hybrid                                    | UniAD <a href="#">You et al. (2022)</a>          | 100.                                          | 100.                 | 100.        | 98.9 | 36.3                 | 38.1    | 97.6     | 23.5 | 83.9 |      |
|                                           |                                           | RD++ <a href="#">Tien et al. (2023)</a>          | 100.                                          | 100.                 | 100.        | 99.2 | 39.7                 | 44.4    | 97.4     | 28.5 | 85.1 |      |
|                                           |                                           | DesTSeg <a href="#">Zhang et al. (2023c)</a>     | 100.                                          | 100.                 | 99.5        | 99.5 | 80.6                 | 73.4    | 98.8     | 58.0 | 94.0 |      |
|                                           | metal_nut                                 | Aug.                                             | DRAEM <a href="#">Zavrtanik et al. (2021)</a> | 61.2                 | 86.4        | 89.4 | 39.8                 | 8.4     | 21.2     | 10.8 | 11.9 | 49.5 |
|                                           |                                           |                                                  | SimpleNet <a href="#">Liu et al. (2023)</a>   | 74.3                 | 92.3        | 90.1 | 79.9                 | 33.0    | 36.8     | 52.7 | 22.5 | 68.1 |
|                                           |                                           |                                                  | RealNet <a href="#">Zhang et al. (2024c)</a>  | 63.4                 | 90.4        | 89.4 | 51.6                 | 37.6    | 21.0     | 31.2 | 11.7 | 58.2 |
| Emb.                                      |                                           | CFA <a href="#">Lee et al. (2022)</a>            | 55.7                                          | 87.0                 | 89.4        | 58.4 | 16.2                 | 24.9    | 10.0     | 14.2 | 52.4 |      |
|                                           |                                           | PatchCore <a href="#">Roth et al. (2022)</a>     | 100.                                          | 100.                 | 100.        | 98.8 | 88.9                 | 85.8    | 95.6     | 75.1 | 96.1 |      |
|                                           |                                           | CFLOW-AD <a href="#">Gudovskiy et al. (2022)</a> | 97.8                                          | 99.5                 | 97.3        | 96.0 | 71.4                 | 68.3    | 88.8     | 51.9 | 89.7 |      |
|                                           |                                           | PyramidalFlow <a href="#">Lei et al. (2023)</a>  | 68.0                                          | 91.1                 | 89.9        | 80.1 | 32.8                 | 43.5    | 31.7     | 27.8 | 65.0 |      |
| Rec.                                      |                                           | RD <a href="#">Deng &amp; Li (2022)</a>          | 59.9                                          | 83.6                 | 93.9        | 92.1 | 50.0                 | 52.2    | 87.5     | 35.3 | 74.8 |      |
|                                           |                                           | DiAD <a href="#">He et al. (2024b)</a>           | 94.6                                          | 98.8                 | 94.2        | 94.4 | 73.7                 | 72.5    | 53.9     | 56.9 | 83.2 |      |
|                                           |                                           | ViTAD <a href="#">Zhang et al. (2023a)</a>       | 99.9                                          | 100.                 | 99.5        | 96.1 | 74.2                 | 75.9    | 92.9     | 61.2 | 92.3 |      |
|                                           |                                           | InvAD <a href="#">Zhang et al. (2024a)</a>       | 100.                                          | 100.                 | 100.        | 97.7 | 81.3                 | 82.0    | 93.7     | 69.5 | 94.3 |      |
|                                           |                                           | InvAD-lite <a href="#">Zhang et al. (2024a)</a>  | 99.7                                          | 99.9                 | 98.9        | 97.4 | 79.6                 | 80.4    | 93.8     | 67.2 | 93.7 |      |
| MambaAD <a href="#">He et al. (2024a)</a> |                                           | 99.8                                             | 100.                                          | 98.9                 | 97.1        | 77.3 | 80.2                 | 94.3    | 66.9     | 93.4 |      |      |
| Hybrid                                    |                                           | UniAD <a href="#">You et al. (2022)</a>          | 98.3                                          | 99.5                 | 98.9        | 92.6 | 48.8                 | 63.0    | 79.4     | 46.0 | 84.9 |      |
|                                           |                                           | RD++ <a href="#">Tien et al. (2023)</a>          | 100.                                          | 100.                 | 99.5        | 96.6 | 74.0                 | 77.4    | 93.4     | 63.1 | 92.6 |      |
|                                           |                                           | DesTSeg <a href="#">Zhang et al. (2023c)</a>     | 100.                                          | 100.                 | 100.        | 96.9 | 91.2                 | 86.1    | 93.2     | 75.6 | 95.9 |      |

Table A58: Benchmarked results on MVTec AD dataset [Bergmann et al. \(2019\)](#) by the suggested metrics in Sec. 3.3.

|            | Method | Image-level                                      |      |                      | Pixel-level |      |                      | mAU-PRO | mIoU-max | mAD  |      |
|------------|--------|--------------------------------------------------|------|----------------------|-------------|------|----------------------|---------|----------|------|------|
|            |        | mAU-ROC                                          | mAP  | mF <sub>1</sub> -max | mAU-ROC     | mAP  | mF <sub>1</sub> -max |         |          |      |      |
| pill       | Aug.   | DRAEM <a href="#">Zavrtanik et al. (2021)</a>    | 68.0 | 91.5                 | 92.5        | 46.0 | 3.3                  | 6.6     | 18.4     | 3.4  | 51.3 |
|            |        | SimpleNet <a href="#">Liu et al. (2023)</a>      | 71.4 | 93.5                 | 91.6        | 94.1 | 53.0                 | 50.7    | 77.7     | 34.0 | 77.2 |
|            |        | RealNet <a href="#">Zhang et al. (2024c)</a>     | 63.3 | 91.6                 | 91.6        | 51.1 | 41.1                 | 6.5     | 28.3     | 3.4  | 57.0 |
|            | Emb.   | CFA <a href="#">Lee et al. (2022)</a>            | 62.4 | 89.5                 | 91.6        | 48.5 | 4.8                  | 9.5     | 27.3     | 5.0  | 51.8 |
|            |        | PatchCore <a href="#">Roth et al. (2022)</a>     | 97.0 | 99.4                 | 96.5        | 98.1 | 76.8                 | 74.0    | 96.1     | 58.7 | 91.9 |
|            |        | CFLOW-AD <a href="#">Gudovskiy et al. (2022)</a> | 85.0 | 96.8                 | 92.3        | 96.5 | 56.2                 | 55.8    | 90.9     | 38.7 | 83.1 |
|            |        | PyramidalFlow <a href="#">Lei et al. (2023)</a>  | 68.7 | 93.0                 | 91.8        | 77.6 | 13.9                 | 24.2    | 61.2     | 13.8 | 64.4 |
|            | Rec.   | RD <a href="#">Deng &amp; Li (2022)</a>          | 97.0 | 99.5                 | 97.2        | 97.5 | 63.1                 | 64.5    | 96.0     | 47.6 | 89.1 |
|            |        | DiAD <a href="#">He et al. (2024b)</a>           | 94.7 | 99.0                 | 97.2        | 93.0 | 50.4                 | 50.6    | 65.7     | 33.9 | 78.6 |
|            |        | ViTAD <a href="#">Zhang et al. (2023a)</a>       | 96.2 | 99.4                 | 96.4        | 98.7 | 77.5                 | 75.4    | 95.5     | 60.6 | 92.1 |
|            |        | InvAD <a href="#">Zhang et al. (2024a)</a>       | 97.6 | 99.6                 | 97.2        | 98.0 | 69.9                 | 68.3    | 96.4     | 51.9 | 90.6 |
|            |        | InvAD-lite <a href="#">Zhang et al. (2024a)</a>  | 96.5 | 99.4                 | 96.1        | 98.0 | 71.7                 | 70.6    | 96.6     | 54.6 | 90.8 |
|            |        | MambaAD <a href="#">He et al. (2024a)</a>        | 95.5 | 99.2                 | 96.5        | 97.1 | 61.3                 | 64.1    | 95.6     | 47.2 | 88.3 |
|            | Hybrid | UniAD <a href="#">You et al. (2022)</a>          | 94.1 | 98.9                 | 95.1        | 95.1 | 40.7                 | 45.9    | 94.7     | 29.8 | 82.6 |
|            |        | RD++ <a href="#">Tien et al. (2023)</a>          | 97.6 | 99.5                 | 97.9        | 98.2 | 73.4                 | 70.9    | 96.3     | 54.9 | 91.5 |
|            |        | DesTSeg <a href="#">Zhang et al. (2023c)</a>     | 88.9 | 97.8                 | 93.0        | 89.5 | 83.5                 | 77.4    | 48.9     | 63.1 | 84.0 |
| screw      | Aug.   | DRAEM <a href="#">Zavrtanik et al. (2021)</a>    | 53.0 | 75.7                 | 85.6        | 51.6 | 0.4                  | 0.5     | 17.5     | 0.3  | 44.5 |
|            |        | SimpleNet <a href="#">Liu et al. (2023)</a>      | 63.0 | 84.6                 | 85.3        | 91.3 | 1.7                  | 3.8     | 70.5     | 1.9  | 59.7 |
|            |        | RealNet <a href="#">Zhang et al. (2024c)</a>     | 72.7 | 89.0                 | 85.6        | 50.6 | 9.2                  | 1.9     | 17.0     | 1.0  | 51.1 |
|            | Emb.   | CFA <a href="#">Lee et al. (2022)</a>            | 64.2 | 82.6                 | 85.9        | 32.2 | 0.2                  | 0.8     | 13.1     | 0.4  | 44.6 |
|            |        | PatchCore <a href="#">Roth et al. (2022)</a>     | 98.3 | 99.4                 | 97.1        | 99.5 | 41.5                 | 44.6    | 97.2     | 28.7 | 84.5 |
|            |        | CFLOW-AD <a href="#">Gudovskiy et al. (2022)</a> | 71.4 | 88.4                 | 85.8        | 97.0 | 17.2                 | 24.2    | 89.3     | 13.7 | 69.4 |
|            |        | PyramidalFlow <a href="#">Lei et al. (2023)</a>  | 46.7 | 72.0                 | 85.3        | 58.5 | 0.3                  | 1.3     | 10.7     | 0.6  | 42.9 |
|            | Rec.   | RD <a href="#">Deng &amp; Li (2022)</a>          | 98.3 | 99.5                 | 96.1        | 99.4 | 41.3                 | 44.9    | 97.1     | 29.0 | 84.3 |
|            |        | DiAD <a href="#">He et al. (2024b)</a>           | 72.4 | 87.1                 | 87.5        | 86.4 | 3.1                  | 8.2     | 55.4     | 4.3  | 57.1 |
|            |        | ViTAD <a href="#">Zhang et al. (2023a)</a>       | 91.2 | 97.0                 | 92.0        | 98.9 | 33.2                 | 39.8    | 93.6     | 24.9 | 79.9 |
|            |        | InvAD <a href="#">Zhang et al. (2024a)</a>       | 97.2 | 99.0                 | 95.9        | 99.6 | 49.5                 | 51.6    | 97.5     | 34.8 | 86.0 |
|            |        | InvAD-lite <a href="#">Zhang et al. (2024a)</a>  | 93.9 | 97.8                 | 93.5        | 99.5 | 46.9                 | 50.4    | 97.7     | 33.7 | 84.3 |
|            |        | MambaAD <a href="#">He et al. (2024a)</a>        | 93.9 | 97.6                 | 94.0        | 99.4 | 50.1                 | 50.2    | 97.4     | 33.5 | 84.7 |
|            | Hybrid | UniAD <a href="#">You et al. (2022)</a>          | 92.4 | 96.6                 | 93.3        | 98.9 | 31.5                 | 37.8    | 94.2     | 23.3 | 79.8 |
|            |        | RD++ <a href="#">Tien et al. (2023)</a>          | 98.7 | 99.6                 | 96.7        | 99.5 | 41.7                 | 47.5    | 97.7     | 31.1 | 85.0 |
|            |        | DesTSeg <a href="#">Zhang et al. (2023c)</a>     | 86.4 | 95.3                 | 89.8        | 74.4 | 49.2                 | 46.7    | 50.1     | 30.5 | 72.8 |
| tile       | Aug.   | DRAEM <a href="#">Zavrtanik et al. (2021)</a>    | 63.4 | 83.5                 | 83.8        | 48.8 | 6.4                  | 13.2    | 14.2     | 7.0  | 48.8 |
|            |        | SimpleNet <a href="#">Liu et al. (2023)</a>      | 86.5 | 94.9                 | 88.1        | 75.0 | 27.3                 | 35.7    | 49.0     | 21.7 | 68.3 |
|            |        | RealNet <a href="#">Zhang et al. (2024c)</a>     | 98.7 | 99.6                 | 98.2        | 91.9 | 84.8                 | 78.4    | 87.3     | 64.5 | 92.2 |
|            | Emb.   | CFA <a href="#">Lee et al. (2022)</a>            | 52.5 | 76.5                 | 83.6        | 22.5 | 4.2                  | 13.2    | 5.3      | 7.0  | 41.1 |
|            |        | PatchCore <a href="#">Roth et al. (2022)</a>     | 100. | 100.                 | 99.4        | 96.4 | 58.7                 | 67.1    | 86.6     | 50.5 | 88.5 |
|            |        | CFLOW-AD <a href="#">Gudovskiy et al. (2022)</a> | 99.7 | 99.9                 | 99.4        | 95.9 | 55.9                 | 62.1    | 86.7     | 45.0 | 87.4 |
|            |        | PyramidalFlow <a href="#">Lei et al. (2023)</a>  | 82.9 | 93.8                 | 85.4        | 79.5 | 46.6                 | 41.2    | 49.2     | 25.9 | 70.7 |
|            | Rec.   | RD <a href="#">Deng &amp; Li (2022)</a>          | 97.9 | 99.2                 | 95.2        | 95.2 | 48.4                 | 60.4    | 85.7     | 43.2 | 84.9 |
|            |        | DiAD <a href="#">He et al. (2024b)</a>           | 93.0 | 96.6                 | 96.3        | 76.2 | 25.0                 | 33.8    | 50.5     | 20.3 | 67.4 |
|            |        | ViTAD <a href="#">Zhang et al. (2023a)</a>       | 99.9 | 100.                 | 98.8        | 96.5 | 56.5                 | 68.7    | 88.0     | 52.3 | 88.5 |
|            |        | InvAD <a href="#">Zhang et al. (2024a)</a>       | 100. | 100.                 | 100.        | 95.5 | 50.0                 | 61.3    | 87.6     | 44.2 | 86.8 |
|            |        | InvAD-lite <a href="#">Zhang et al. (2024a)</a>  | 98.2 | 99.3                 | 96.5        | 94.4 | 47.9                 | 55.8    | 82.4     | 38.7 | 84.1 |
|            |        | MambaAD <a href="#">He et al. (2024a)</a>        | 98.2 | 99.3                 | 96.0        | 93.7 | 44.7                 | 54.0    | 80.8     | 37.0 | 83.1 |
|            | Hybrid | UniAD <a href="#">You et al. (2022)</a>          | 100. | 100.                 | 100.        | 92.6 | 43.2                 | 51.4    | 81.5     | 34.6 | 83.6 |
|            |        | RD++ <a href="#">Tien et al. (2023)</a>          | 99.9 | 100.                 | 99.4        | 96.3 | 52.8                 | 64.3    | 88.7     | 47.4 | 87.6 |
|            |        | DesTSeg <a href="#">Zhang et al. (2023c)</a>     | 100. | 100.                 | 100.        | 98.9 | 95.9                 | 89.5    | 98.0     | 81.0 | 97.8 |
| toothbrush | Aug.   | DRAEM <a href="#">Zavrtanik et al. (2021)</a>    | 43.6 | 68.4                 | 83.3        | 49.9 | 1.7                  | 3.8     | 16.1     | 2.0  | 41.5 |
|            |        | SimpleNet <a href="#">Liu et al. (2023)</a>      | 91.4 | 96.5                 | 90.9        | 94.4 | 36.7                 | 40.9    | 72.1     | 25.7 | 77.0 |
|            |        | RealNet <a href="#">Zhang et al. (2024c)</a>     | 85.0 | 94.6                 | 86.6        | 72.3 | 41.5                 | 43.2    | 25.6     | 27.6 | 67.2 |
|            | Emb.   | CFA <a href="#">Lee et al. (2022)</a>            | 43.6 | 72.2                 | 83.3        | 52.5 | 5.6                  | 9.5     | 39.9     | 5.0  | 46.6 |
|            |        | PatchCore <a href="#">Roth et al. (2022)</a>     | 91.9 | 96.2                 | 95.2        | 99.0 | 54.8                 | 58.5    | 91.0     | 41.3 | 85.1 |
|            |        | CFLOW-AD <a href="#">Gudovskiy et al. (2022)</a> | 83.3 | 94.3                 | 84.6        | 98.2 | 46.0                 | 52.3    | 85.7     | 35.5 | 79.0 |
|            |        | PyramidalFlow <a href="#">Lei et al. (2023)</a>  | 60.3 | 82.9                 | 83.3        | 75.0 | 17.5                 | 18.1    | 16.5     | 10.0 | 53.6 |
|            | Rec.   | RD <a href="#">Deng &amp; Li (2022)</a>          | 35.8 | 62.6                 | 85.7        | 97.3 | 21.3                 | 40.0    | 86.1     | 25.0 | 61.3 |
|            |        | DiAD <a href="#">He et al. (2024b)</a>           | 95.0 | 98.0                 | 95.2        | 89.7 | 11.1                 | 18.4    | 64.9     | 10.1 | 67.5 |
|            |        | ViTAD <a href="#">Zhang et al. (2023a)</a>       | 100. | 100.                 | 100.        | 99.1 | 54.7                 | 62.5    | 91.0     | 45.4 | 88.4 |
|            |        | InvAD <a href="#">Zhang et al. (2024a)</a>       | 94.2 | 97.6                 | 95.2        | 99.0 | 52.4                 | 59.7    | 91.5     | 42.5 | 85.7 |
|            |        | InvAD-lite <a href="#">Zhang et al. (2024a)</a>  | 98.1 | 99.2                 | 96.8        | 99.0 | 50.3                 | 59.7    | 91.2     | 42.6 | 86.5 |
|            |        | MambaAD <a href="#">He et al. (2024a)</a>        | 98.9 | 99.6                 | 96.8        | 99.0 | 47.8                 | 60.3    | 92.5     | 43.2 | 86.7 |
|            | Hybrid | UniAD <a href="#">You et al. (2022)</a>          | 90.3 | 95.6                 | 95.2        | 98.5 | 39.1                 | 49.9    | 87.9     | 33.2 | 81.3 |
|            |        | RD++ <a href="#">Tien et al. (2023)</a>          | 96.7 | 98.7                 | 95.1        | 99.1 | 57.0                 | 61.5    | 92.2     | 44.4 | 87.1 |
|            |        | DesTSeg <a href="#">Zhang et al. (2023c)</a>     | 93.9 | 97.7                 | 92.3        | 97.5 | 74.5                 | 70.7    | 81.1     | 54.6 | 87.8 |

Table A59: Benchmarked results on MVTec AD dataset [Bergmann et al. \(2019\)](#) by the suggested metrics in Sec. 3.3.

|            | Method | Image-level                                      |      |         | Pixel-level |      |         | mAU-PRO | mIoU-max | mAD  |      |
|------------|--------|--------------------------------------------------|------|---------|-------------|------|---------|---------|----------|------|------|
|            |        | mAU-ROC                                          | mAP  | mF1-max | mAU-ROC     | mAP  | mF1-max |         |          |      |      |
| transistor | Aug.   | DRAEM <a href="#">Zavrtanik et al. (2021)</a>    | 42.0 | 36.8    | 57.6        | 50.4 | 4.2     | 9.2     | 14.9     | 4.8  | 32.6 |
|            |        | SimpleNet <a href="#">Liu et al. (2023)</a>      | 81.8 | 81.9    | 70.1        | 75.8 | 31.9    | 38.0    | 57.0     | 23.5 | 64.3 |
|            |        | RealNet <a href="#">Zhang et al. (2024c)</a>     | 73.2 | 76.8    | 68.8        | 57.5 | 48.6    | 22.7    | 31.6     | 12.8 | 56.5 |
|            | Emb.   | CFA <a href="#">Lee et al. (2022)</a>            | 70.0 | 59.8    | 66.0        | 53.8 | 8.0     | 12.0    | 24.0     | 6.4  | 44.9 |
|            |        | PatchCore <a href="#">Roth et al. (2022)</a>     | 99.8 | 99.7    | 97.5        | 96.0 | 62.3    | 59.2    | 90.8     | 42.0 | 88.0 |
|            |        | CFLOW-AD <a href="#">Gudovskiy et al. (2022)</a> | 92.4 | 93.4    | 88.9        | 84.6 | 38.8    | 40.3    | 74.1     | 25.3 | 75.5 |
|            |        | PyramidalFlow <a href="#">Lei et al. (2023)</a>  | 66.9 | 64.9    | 59.8        | 73.4 | 17.9    | 20.4    | 25.2     | 11.3 | 49.0 |
|            | Rec.   | RD <a href="#">Deng &amp; Li (2022)</a>          | 93.7 | 94.4    | 90.9        | 85.6 | 41.7    | 44.7    | 74.8     | 28.8 | 77.3 |
|            |        | DiAD <a href="#">He et al. (2024b)</a>           | 99.0 | 98.7    | 97.5        | 98.1 | 72.8    | 68.5    | 85.3     | 52.1 | 88.6 |
|            |        | ViTAD <a href="#">Zhang et al. (2023a)</a>       | 98.5 | 97.9    | 92.1        | 93.7 | 57.6    | 54.5    | 77.0     | 37.5 | 83.4 |
|            |        | InvAD <a href="#">Zhang et al. (2024a)</a>       | 99.7 | 99.6    | 96.4        | 97.1 | 69.4    | 66.3    | 93.1     | 49.6 | 90.0 |
|            |        | InvAD-lite <a href="#">Zhang et al. (2024a)</a>  | 96.6 | 95.6    | 87.8        | 95.0 | 62.4    | 59.7    | 85.7     | 42.5 | 84.5 |
|            |        | MambaAD <a href="#">He et al. (2024a)</a>        | 100. | 99.9    | 98.8        | 95.7 | 64.4    | 63.5    | 86.4     | 46.5 | 88.5 |
|            | Hybrid | UniAD <a href="#">You et al. (2022)</a>          | 100. | 100.    | 100.        | 97.6 | 65.2    | 65.8    | 94.4     | 49.0 | 90.4 |
|            |        | RD++ <a href="#">Tien et al. (2023)</a>          | 95.4 | 95.0    | 92.3        | 89.5 | 48.8    | 50.2    | 78.3     | 33.5 | 80.5 |
|            |        | DesTSeg <a href="#">Zhang et al. (2023c)</a>     | 99.5 | 99.3    | 96.3        | 76.6 | 60.4    | 56.6    | 78.2     | 39.5 | 83.2 |
| wood       | Aug.   | DRAEM <a href="#">Zavrtanik et al. (2021)</a>    | 52.4 | 82.0    | 86.3        | 47.8 | 3.7     | 7.5     | 13.7     | 3.9  | 45.9 |
|            |        | SimpleNet <a href="#">Liu et al. (2023)</a>      | 84.4 | 93.4    | 91.5        | 74.6 | 15.1    | 23.3    | 53.6     | 13.2 | 65.7 |
|            |        | RealNet <a href="#">Zhang et al. (2024c)</a>     | 99.6 | 99.9    | 99.2        | 87.4 | 77.0    | 73.7    | 85.4     | 58.3 | 90.2 |
|            | Emb.   | CFA <a href="#">Lee et al. (2022)</a>            | 81.7 | 92.4    | 90.3        | 64.8 | 7.7     | 12.9    | 31.0     | 6.9  | 58.6 |
|            |        | PatchCore <a href="#">Roth et al. (2022)</a>     | 98.7 | 99.6    | 96.7        | 95.2 | 52.1    | 52.3    | 91.3     | 35.4 | 85.5 |
|            |        | CFLOW-AD <a href="#">Gudovskiy et al. (2022)</a> | 98.9 | 99.7    | 97.5        | 94.4 | 47.0    | 50.4    | 91.0     | 33.7 | 84.7 |
|            |        | PyramidalFlow <a href="#">Lei et al. (2023)</a>  | 86.8 | 95.2    | 89.9        | 71.2 | 35.9    | 15.2    | 50.3     | 8.2  | 66.9 |
|            | Rec.   | RD <a href="#">Deng &amp; Li (2022)</a>          | 99.4 | 99.8    | 98.3        | 95.5 | 49.4    | 51.7    | 91.6     | 34.9 | 85.6 |
|            |        | DiAD <a href="#">He et al. (2024b)</a>           | 93.5 | 97.5    | 94.4        | 83.1 | 15.0    | 22.8    | 58.0     | 12.8 | 66.3 |
|            |        | ViTAD <a href="#">Zhang et al. (2023a)</a>       | 98.9 | 99.7    | 96.8        | 96.1 | 60.8    | 57.9    | 88.6     | 40.8 | 87.2 |
|            |        | InvAD <a href="#">Zhang et al. (2024a)</a>       | 98.9 | 99.6    | 98.3        | 94.8 | 48.3    | 50.0    | 89.9     | 33.3 | 84.8 |
|            |        | InvAD-lite <a href="#">Zhang et al. (2024a)</a>  | 97.3 | 99.1    | 95.9        | 94.9 | 47.3    | 48.4    | 88.7     | 31.9 | 83.6 |
|            |        | MambaAD <a href="#">He et al. (2024a)</a>        | 98.7 | 99.6    | 96.8        | 94.2 | 46.7    | 47.7    | 92.1     | 31.3 | 84.3 |
|            | Hybrid | UniAD <a href="#">You et al. (2022)</a>          | 98.6 | 99.6    | 96.7        | 93.3 | 38.4    | 43.5    | 88.0     | 27.8 | 82.0 |
|            |        | RD++ <a href="#">Tien et al. (2023)</a>          | 99.3 | 99.8    | 98.3        | 95.3 | 50.2    | 51.1    | 90.3     | 34.3 | 85.4 |
|            |        | DesTSeg <a href="#">Zhang et al. (2023c)</a>     | 99.2 | 99.7    | 98.4        | 94.1 | 83.6    | 76.8    | 94.8     | 62.3 | 93.2 |
| zipper     | Aug.   | DRAEM <a href="#">Zavrtanik et al. (2021)</a>    | 77.0 | 90.6    | 89.8        | 60.1 | 3.7     | 4.1     | 26.4     | 2.1  | 54.7 |
|            |        | SimpleNet <a href="#">Liu et al. (2023)</a>      | 95.0 | 98.7    | 93.5        | 92.6 | 39.2    | 44.6    | 78.3     | 28.7 | 79.7 |
|            |        | RealNet <a href="#">Zhang et al. (2024c)</a>     | 80.6 | 94.8    | 88.1        | 65.5 | 55.0    | 40.5    | 42.0     | 25.4 | 69.3 |
|            | Emb.   | CFA <a href="#">Lee et al. (2022)</a>            | 43.4 | 78.6    | 88.1        | 32.7 | 1.6     | 4.2     | 9.1      | 2.1  | 41.0 |
|            |        | PatchCore <a href="#">Roth et al. (2022)</a>     | 99.6 | 99.9    | 98.7        | 98.9 | 63.4    | 64.6    | 96.4     | 47.8 | 90.1 |
|            |        | CFLOW-AD <a href="#">Gudovskiy et al. (2022)</a> | 96.0 | 98.7    | 97.1        | 98.0 | 50.1    | 55.7    | 92.8     | 38.6 | 85.7 |
|            |        | PyramidalFlow <a href="#">Lei et al. (2023)</a>  | 60.9 | 87.5    | 88.1        | 70.0 | 6.0     | 8.1     | 32.7     | 4.2  | 54.0 |
|            | Rec.   | RD <a href="#">Deng &amp; Li (2022)</a>          | 99.5 | 99.9    | 99.2        | 98.4 | 52.4    | 59.9    | 95.2     | 42.8 | 88.0 |
|            |        | DiAD <a href="#">He et al. (2024b)</a>           | 71.8 | 89.5    | 90.2        | 84.0 | 13.5    | 23.8    | 55.5     | 13.5 | 61.2 |
|            |        | ViTAD <a href="#">Zhang et al. (2023a)</a>       | 97.7 | 99.3    | 97.5        | 95.9 | 43.6    | 50.2    | 89.4     | 33.6 | 84.0 |
|            |        | InvAD <a href="#">Zhang et al. (2024a)</a>       | 99.6 | 99.9    | 99.2        | 98.4 | 50.8    | 58.0    | 95.0     | 40.9 | 87.6 |
|            |        | InvAD-lite <a href="#">Zhang et al. (2024a)</a>  | 99.3 | 99.8    | 97.5        | 98.5 | 57.7    | 61.0    | 95.5     | 43.9 | 88.5 |
|            |        | MambaAD <a href="#">He et al. (2024a)</a>        | 99.1 | 99.8    | 97.4        | 98.2 | 58.2    | 60.5    | 95.0     | 43.3 | 88.4 |
|            | Hybrid | UniAD <a href="#">You et al. (2022)</a>          | 95.3 | 98.5    | 96.2        | 97.0 | 37.7    | 46.6    | 91.4     | 30.4 | 82.4 |
|            |        | RD++ <a href="#">Tien et al. (2023)</a>          | 68.2 | 89.3    | 92.2        | 98.3 | 50.8    | 57.9    | 94.5     | 40.7 | 79.3 |
|            |        | DesTSeg <a href="#">Zhang et al. (2023c)</a>     | 99.4 | 99.8    | 98.3        | 94.7 | 80.8    | 74.1    | 90.9     | 58.8 | 92.1 |
| Avg        | Aug.   | DRAEM <a href="#">Zavrtanik et al. (2021)</a>    | 55.2 | 77.0    | 83.9        | 48.7 | 3.1     | 6.3     | 15.8     | 3.3  | 45.3 |
|            |        | SimpleNet <a href="#">Liu et al. (2023)</a>      | 79.2 | 90.8    | 87.6        | 82.4 | 24.0    | 29.0    | 62.0     | 17.8 | 67.6 |
|            |        | RealNet <a href="#">Zhang et al. (2024c)</a>     | 82.9 | 93.3    | 90.9        | 69.8 | 50.0    | 40.4    | 51.2     | 28.5 | 70.9 |
|            | Emb.   | CFA <a href="#">Lee et al. (2022)</a>            | 55.8 | 78.8    | 84.5        | 43.9 | 4.8     | 8.9     | 19.3     | 4.7  | 46.1 |
|            |        | PatchCore <a href="#">Roth et al. (2022)</a>     | 98.8 | 99.5    | 98.4        | 98.3 | 59.9    | 61.0    | 94.2     | 44.9 | 88.6 |
|            |        | CFLOW-AD <a href="#">Gudovskiy et al. (2022)</a> | 92.7 | 97.2    | 94.0        | 95.8 | 46.8    | 49.6    | 89.0     | 34.0 | 82.5 |
|            |        | PyramidalFlow <a href="#">Lei et al. (2023)</a>  | 66.2 | 84.3    | 85.1        | 74.2 | 17.2    | 19.6    | 40.0     | 11.4 | 58.1 |
|            | Rec.   | RD <a href="#">Deng &amp; Li (2022)</a>          | 90.5 | 95.0    | 95.1        | 95.9 | 47.1    | 52.1    | 91.2     | 35.8 | 82.6 |
|            |        | DiAD <a href="#">He et al. (2024b)</a>           | 92.0 | 96.8    | 94.4        | 89.3 | 27.3    | 32.7    | 64.4     | 21.3 | 71.0 |
|            |        | ViTAD <a href="#">Zhang et al. (2023a)</a>       | 98.4 | 99.4    | 97.5        | 97.5 | 55.2    | 58.1    | 91.7     | 42.0 | 87.0 |
|            |        | InvAD <a href="#">Zhang et al. (2024a)</a>       | 98.9 | 99.6    | 98.2        | 98.1 | 57.1    | 59.6    | 94.4     | 43.1 | 88.1 |
|            |        | InvAD-lite <a href="#">Zhang et al. (2024a)</a>  | 98.1 | 99.1    | 96.8        | 97.3 | 55.0    | 58.1    | 93.1     | 41.7 | 86.9 |
|            |        | MambaAD <a href="#">He et al. (2024a)</a>        | 98.5 | 99.5    | 97.7        | 97.6 | 56.1    | 58.7    | 93.6     | 42.3 | 87.5 |
|            | Hybrid | UniAD <a href="#">You et al. (2022)</a>          | 96.8 | 98.9    | 97.0        | 96.8 | 45.0    | 50.2    | 91.0     | 34.2 | 84.2 |
|            |        | RD++ <a href="#">Tien et al. (2023)</a>          | 95.8 | 98.0    | 96.6        | 97.3 | 53.0    | 57.0    | 92.9     | 40.5 | 85.9 |
|            |        | DesTSeg <a href="#">Zhang et al. (2023c)</a>     | 96.3 | 98.8    | 96.1        | 92.6 | 75.8    | 71.3    | 82.6     | 56.6 | 88.8 |

## O DETAILED QUANTITATIVE RESULTS ON MVTEC 3D DATASET UNDER 300 EPOCHS

Table A60: Benchmarked results on MVTEC 3D dataset [Bergmann et al. \(2022b\)](#) by the suggested metrics in Sec. 3.3.

|             | Method | Image-level                                      |             |                      | Pixel-level |             |                      | mAU-PRO     | mIoU-max    | mAD         |
|-------------|--------|--------------------------------------------------|-------------|----------------------|-------------|-------------|----------------------|-------------|-------------|-------------|
|             |        | mAU-ROC                                          | mAP         | mF <sub>1</sub> -max | mAU-ROC     | mAP         | mF <sub>1</sub> -max |             |             |             |
| bagel       | Aug.   | DRAEM <a href="#">Zavrtanik et al. (2021)</a>    | 59.8        | 86.3                 | 88.9        | 53.2        | 1.5                  | 5.3         | 28.4        | 50.2        |
|             |        | SimpleNet <a href="#">Liu et al. (2023)</a>      | 80.8        | 94.3                 | 91.3        | 95.7        | 19.2                 | 28.0        | 78.1        | 72.0        |
|             |        | CFA <a href="#">Lee et al. (2022)</a>            | 68.2        | 90.2                 | 88.9        | 71.5        | 12.8                 | 23.4        | 34.8        | 59.0        |
|             | Emb.   | PatchCore <a href="#">Roth et al. (2022)</a>     | 91.8        | 98.0                 | 92.9        | 98.8        | 43.7                 | 46.8        | 93.3        | 82.4        |
|             |        | CFLOW-AD <a href="#">Gudovskiy et al. (2022)</a> | 79.6        | 94.4                 | 89.8        | 98.3        | 31.0                 | 39.1        | 89.6        | 76.2        |
|             |        | PyramidalFlow <a href="#">Lei et al. (2023)</a>  | 59.9        | 87.0                 | 88.9        | 93.9        | 11.9                 | 17.7        | 76.8        | 64.3        |
|             | Rec.   | RD <a href="#">Deng &amp; Li (2022)</a>          | 91.8        | 97.9                 | 94.3        | 98.6        | 39.2                 | 44.8        | 91.2        | 81.6        |
|             |        | DiAD <a href="#">He et al. (2024b)</a>           | 89.6        | 97.6                 | 91.5        | 89.6        | 4.5                  | 10.3        | 66.2        | 64.2        |
|             |        | ViTAD <a href="#">Zhang et al. (2023a)</a>       | 89.3        | 97.1                 | 93.4        | 98.6        | 38.6                 | 43.6        | 91.8        | 80.7        |
|             |        | InvAD <a href="#">Zhang et al. (2024a)</a>       | 91.3        | 97.8                 | 92.5        | <b>98.9</b> | 44.7                 | 48.5        | <b>93.8</b> | 82.7        |
|             |        | InvAD-lite <a href="#">Zhang et al. (2024a)</a>  | 81.1        | 94.8                 | 91.1        | 98.3        | 40.1                 | 44.5        | 89.6        | 78.6        |
|             |        | MambaAD <a href="#">He et al. (2024a)</a>        | 91.9        | 98.0                 | 92.0        | 98.6        | 38.3                 | 43.6        | 93.1        | 81.2        |
|             | Hybrid | UniAD <a href="#">You et al. (2022)</a>          | 84.9        | 96.1                 | 89.9        | 98.0        | 32.9                 | 37.6        | 89.2        | 77.4        |
|             |        | RD++ <a href="#">Tien et al. (2023)</a>          | 85.6        | 96.2                 | 91.8        | 98.7        | 39.3                 | 45.9        | 91.8        | 80.1        |
|             |        | DesTSeg <a href="#">Zhang et al. (2023c)</a>     | <b>96.8</b> | <b>99.3</b>          | <b>95.2</b> | 96.6        | <b>66.6</b>          | <b>64.1</b> | 89.2        | <b>88.1</b> |
| cable gland | Aug.   | DRAEM <a href="#">Zavrtanik et al. (2021)</a>    | 26.1        | 68.5                 | 89.2        | 56.9        | 0.4                  | 0.9         | 26.6        | 41.2        |
|             |        | SimpleNet <a href="#">Liu et al. (2023)</a>      | 87.1        | 96.6                 | 92.9        | 96.9        | 13.8                 | 20.3        | 90.3        | 73.8        |
|             |        | CFA <a href="#">Lee et al. (2022)</a>            | 42.9        | 80.5                 | 89.2        | 43.1        | 1.3                  | 5.5         | 23.3        | 44.6        |
|             | Emb.   | PatchCore <a href="#">Roth et al. (2022)</a>     | 96.4        | 99.0                 | 96.1        | <b>99.5</b> | 37.3                 | 43.6        | 98.3        | 83.4        |
|             |        | CFLOW-AD <a href="#">Gudovskiy et al. (2022)</a> | 75.4        | 92.1                 | 89.7        | 97.2        | 11.4                 | 16.9        | 91.5        | 70.0        |
|             |        | PyramidalFlow <a href="#">Lei et al. (2023)</a>  | 55.4        | 83.9                 | 89.2        | 75.4        | 0.8                  | 2.2         | 47.2        | 53.8        |
|             | Rec.   | RD <a href="#">Deng &amp; Li (2022)</a>          | 91.5        | 97.7                 | 93.6        | 99.4        | 36.8                 | 41.9        | 98.2        | 81.7        |
|             |        | DiAD <a href="#">He et al. (2024b)</a>           | 88.1        | 96.5                 | 94.6        | 94.5        | 4.1                  | 10.0        | 81.3        | 67.0        |
|             |        | ViTAD <a href="#">Zhang et al. (2023a)</a>       | 85.9        | 95.0                 | 92.7        | 98.8        | 24.2                 | 32.4        | 96.2        | 77.1        |
|             |        | InvAD <a href="#">Zhang et al. (2024a)</a>       | <b>97.3</b> | <b>99.3</b>          | <b>97.7</b> | <b>99.5</b> | 40.6                 | 46.9        | <b>98.7</b> | <b>84.8</b> |
|             |        | InvAD-lite <a href="#">Zhang et al. (2024a)</a>  | 95.1        | 98.8                 | 94.8        | 99.4        | 40.9                 | 47.7        | 98.4        | 83.9        |
|             |        | MambaAD <a href="#">He et al. (2024a)</a>        | 94.6        | 98.7                 | 94.9        | 99.4        | 40.5                 | 46.1        | 98.4        | 83.6        |
|             | Hybrid | UniAD <a href="#">You et al. (2022)</a>          | 78.8        | 91.7                 | 91.6        | 98.5        | 23.5                 | 32.4        | 95.3        | 74.9        |
|             |        | RD++ <a href="#">Tien et al. (2023)</a>          | 94.6        | 98.6                 | 95.6        | <b>99.5</b> | 41.0                 | 45.3        | 98.4        | 83.7        |
|             |        | DesTSeg <a href="#">Zhang et al. (2023c)</a>     | 88.2        | 97.1                 | 91.3        | 86.8        | <b>45.8</b>          | <b>52.1</b> | 80.2        | <b>35.2</b> |
| carrot      | Aug.   | DRAEM <a href="#">Zavrtanik et al. (2021)</a>    | 32.5        | 76.1                 | 90.7        | 57.7        | 0.7                  | 1.4         | 31.5        | 44.6        |
|             |        | SimpleNet <a href="#">Liu et al. (2023)</a>      | 68.2        | 91.5                 | 91.0        | 96.5        | 8.8                  | 15.7        | 86.3        | 67.7        |
|             |        | CFA <a href="#">Lee et al. (2022)</a>            | 48.3        | 85.8                 | 90.7        | 56.3        | 2.6                  | 5.8         | 32.4        | 49.6        |
|             | Emb.   | PatchCore <a href="#">Roth et al. (2022)</a>     | <b>95.2</b> | <b>99.0</b>          | 95.6        | <b>99.4</b> | 25.9                 | 30.8        | 97.7        | <b>80.0</b> |
|             |        | CFLOW-AD <a href="#">Gudovskiy et al. (2022)</a> | 86.8        | 97.2                 | 92.6        | 98.9        | 18.6                 | 25.6        | 96.0        | 76.0        |
|             |        | PyramidalFlow <a href="#">Lei et al. (2023)</a>  | 64.8        | 88.4                 | 91.3        | 96.0        | 11.6                 | 18.0        | 86.4        | 67.2        |
|             | Rec.   | RD <a href="#">Deng &amp; Li (2022)</a>          | 85.4        | 96.3                 | 93.1        | 99.3        | 25.8                 | 32.3        | 97.6        | 77.7        |
|             |        | DiAD <a href="#">He et al. (2024b)</a>           | 92.7        | 98.1                 | <b>98.1</b> | 97.6        | 6.3                  | 12.0        | 91.0        | 70.8        |
|             |        | ViTAD <a href="#">Zhang et al. (2023a)</a>       | 79.4        | 94.0                 | 92.5        | 98.8        | 19.5                 | 26.2        | 95.9        | 74.4        |
|             |        | InvAD <a href="#">Zhang et al. (2024a)</a>       | 89.9        | 97.5                 | 94.9        | 99.2        | 24.8                 | 29.6        | 97.4        | 78.4        |
|             |        | InvAD-lite <a href="#">Zhang et al. (2024a)</a>  | 89.0        | 97.4                 | 93.5        | 99.3        | 27.1                 | 32.5        | <b>98.0</b> | 78.8        |
|             |        | MambaAD <a href="#">He et al. (2024a)</a>        | 90.7        | 97.6                 | 95.2        | <b>99.4</b> | 27.1                 | 32.0        | <b>98.0</b> | 79.3        |
|             | Hybrid | UniAD <a href="#">You et al. (2022)</a>          | 73.1        | 93.0                 | 92.0        | 98.2        | 13.6                 | 20.5        | 94.0        | 71.3        |
|             |        | RD++ <a href="#">Tien et al. (2023)</a>          | 88.8        | 97.3                 | 93.5        | 99.3        | 24.4                 | 29.8        | 97.2        | 77.9        |
|             |        | DesTSeg <a href="#">Zhang et al. (2023c)</a>     | 77.4        | 94.0                 | 90.7        | 66.8        | <b>34.7</b>          | <b>33.5</b> | 42.8        | 65.9        |
| cookie      | Aug.   | DRAEM <a href="#">Zavrtanik et al. (2021)</a>    | 51.8        | 80.7                 | <b>89.2</b> | 44.9        | 1.2                  | 3.5         | 14.5        | 45.0        |
|             |        | SimpleNet <a href="#">Liu et al. (2023)</a>      | 62.0        | 85.7                 | 88.0        | 93.1        | 21.9                 | 29.6        | 73.1        | 66.5        |
|             |        | CFA <a href="#">Lee et al. (2022)</a>            | 48.2        | 81.2                 | 88.0        | 49.8        | 5.2                  | 11.2        | 22.9        | 47.4        |
|             | Emb.   | PatchCore <a href="#">Roth et al. (2022)</a>     | 71.0        | 91.6                 | 88.0        | <b>98.0</b> | <b>52.4</b>          | <b>50.2</b> | <b>92.5</b> | <b>78.4</b> |
|             |        | CFLOW-AD <a href="#">Gudovskiy et al. (2022)</a> | 46.9        | 78.7                 | 88.4        | 96.9        | 30.8                 | 31.6        | 89.1        | 66.7        |
|             |        | PyramidalFlow <a href="#">Lei et al. (2023)</a>  | 24.9        | 69.8                 | 88.0        | 85.7        | 6.3                  | 12.3        | 62.7        | 51.3        |
|             | Rec.   | RD <a href="#">Deng &amp; Li (2022)</a>          | 49.9        | 81.2                 | 88.0        | 96.3        | 24.4                 | 31.4        | 86.4        | 66.3        |
|             |        | DiAD <a href="#">He et al. (2024b)</a>           | 53.6        | 79.3                 | 88.0        | 87.4        | 6.1                  | 10.8        | 67.5        | 56.1        |
|             |        | ViTAD <a href="#">Zhang et al. (2023a)</a>       | 71.9        | <b>91.7</b>          | 88.5        | 97.5        | 46.3                 | 47.5        | 87.1        | 76.8        |
|             |        | InvAD <a href="#">Zhang et al. (2024a)</a>       | 62.8        | 87.8                 | 88.0        | <b>98.0</b> | 46.3                 | 46.6        | 91.5        | 75.1        |
|             |        | InvAD-lite <a href="#">Zhang et al. (2024a)</a>  | 67.1        | 89.2                 | 88.3        | 96.2        | 29.1                 | 34.2        | 83.9        | 71.2        |
|             |        | MambaAD <a href="#">He et al. (2024a)</a>        | 67.2        | 89.2                 | 88.0        | 96.5        | 36.7                 | 39.2        | 83.4        | 72.7        |
|             | Hybrid | UniAD <a href="#">You et al. (2022)</a>          | <b>72.1</b> | 90.8                 | 88.5        | 97.4        | 42.5                 | 46.8        | 89.8        | 76.5        |
|             |        | RD++ <a href="#">Tien et al. (2023)</a>          | 56.1        | 83.8                 | 88.0        | 97.3        | 36.7                 | 39.6        | 88.5        | 70.7        |
|             |        | DesTSeg <a href="#">Zhang et al. (2023c)</a>     | 70.7        | 90.5                 | 88.6        | 81.0        | 50.2                 | <b>50.4</b> | 51.7        | <b>33.7</b> |



Table A61: Benchmarked results on MVTec 3D dataset [Bergmann et al. \(2022b\)](#) by the suggested metrics in Sec. 3.3.

|        | Method                                             | Image-level |             |                      | Pixel-level |             |                      | mAU-PRO     | mIoU-max    | mAD         |
|--------|----------------------------------------------------|-------------|-------------|----------------------|-------------|-------------|----------------------|-------------|-------------|-------------|
|        |                                                    | mAU-ROC     | mAP         | mF <sub>1</sub> -max | mAU-ROC     | mAP         | mF <sub>1</sub> -max |             |             |             |
| dowel  | Aug. DRAEM <a href="#">Zavrtanik et al. (2021)</a> | 41.9        | 77.5        | 88.9                 | 34.5        | 0.5         | 2.5                  | 17.0        | 1.2         | 41.5        |
|        | SimpleNet <a href="#">Liu et al. (2023)</a>        | 86.2        | 96.5        | 90.0                 | 96.6        | 13.7        | 21.9                 | 85.2        | 12.3        | 72.6        |
|        | Emb. CFA <a href="#">Lee et al. (2022)</a>         | 60.1        | 82.8        | 90.4                 | 58.5        | 0.4         | 0.9                  | 21.1        | 0.4         | 49.0        |
|        | PatchCore <a href="#">Roth et al. (2022)</a>       | 98.2        | 99.6        | 97.5                 | 99.3        | 44.5        | 46.7                 | 96.3        | 30.5        | 85.1        |
|        | CFLOW-AD <a href="#">Gudovskiy et al. (2022)</a>   | 94.9        | 98.8        | 95.2                 | 98.9        | 29.9        | 34.1                 | 94.8        | 20.6        | 80.4        |
|        | PyramidalFlow <a href="#">Lei et al. (2023)</a>    | 61.3        | 85.5        | 89.3                 | 93.5        | 5.6         | 10.7                 | 74.2        | 5.7         | 62.4        |
|        | Rec. RD <a href="#">Deng &amp; Li (2022)</a>       | 99.4        | <b>99.9</b> | 98.6                 | <b>99.7</b> | 51.6        | <b>51.4</b>          | <b>98.8</b> | <b>34.5</b> | <b>87.3</b> |
|        | DiAD <a href="#">He et al. (2024b)</a>             | 69.9        | 90.8        | 92.4                 | 78.6        | 4.5         | 9.7                  | 48.2        | 5.1         | 56.3        |
|        | ViTAD <a href="#">Zhang et al. (2023a)</a>         | 94.3        | 98.6        | 93.8                 | 99.2        | 37.0        | 41.1                 | 95.9        | 25.9        | 81.9        |
|        | InvAD <a href="#">Zhang et al. (2024a)</a>         | 99.2        | 99.8        | <b>99.0</b>          | <b>99.7</b> | 50.5        | 50.6                 | 98.3        | 33.8        | 87.1        |
|        | InvAD-lite <a href="#">Zhang et al. (2024a)</a>    | 96.5        | 99.2        | 96.2                 | 99.6        | 50.0        | 50.0                 | 97.4        | 33.3        | 85.8        |
|        | MambaAD <a href="#">He et al. (2024a)</a>          | 97.6        | 99.4        | 96.1                 | 99.5        | 51.6        | 50.4                 | 97.4        | 33.7        | 86.2        |
|        | Hybrid UniAD <a href="#">You et al. (2022)</a>     | 94.0        | 98.6        | 93.0                 | 99.1        | 35.6        | 41.2                 | 96.1        | 25.9        | 81.6        |
|        | RD++ <a href="#">Tien et al. (2023)</a>            | <b>99.6</b> | <b>99.9</b> | <b>99.0</b>          | <b>99.7</b> | <b>52.2</b> | 50.6                 | 98.7        | 33.9        | <b>87.4</b> |
|        | DesTSeg <a href="#">Zhang et al. (2023c)</a>       | 82.3        | 95.5        | 89.8                 | 84.4        | 39.8        | 45.8                 | 63.0        | 29.7        | 73.7        |
|        | Aug. DRAEM <a href="#">Zavrtanik et al. (2021)</a> | 50.1        | 83.0        | 88.9                 | 57.0        | 0.3         | 0.4                  | 19.2        | 0.2         | 46.6        |
|        | SimpleNet <a href="#">Liu et al. (2023)</a>        | 74.3        | 93.3        | 88.9                 | 86.4        | 10.8        | 21.9                 | 64.2        | 12.3        | 65.7        |
| foam   | Emb. CFA <a href="#">Lee et al. (2022)</a>         | 61.7        | 88.7        | 88.9                 | 44.4        | 6.4         | 16.1                 | 32.5        | 8.8         | 52.3        |
|        | PatchCore <a href="#">Roth et al. (2022)</a>       | 78.9        | 94.4        | 89.9                 | 94.9        | 18.8        | 29.6                 | 83.4        | 17.4        | 72.2        |
|        | CFLOW-AD <a href="#">Gudovskiy et al. (2022)</a>   | 73.8        | 93.3        | 89.3                 | 85.3        | 16.2        | 26.4                 | 57.3        | 15.2        | 65.9        |
|        | PyramidalFlow <a href="#">Lei et al. (2023)</a>    | 55.5        | 81.3        | 89.9                 | 61.2        | 0.4         | 0.5                  | 32.7        | 0.3         | 49.6        |
|        | Rec. RD <a href="#">Deng &amp; Li (2022)</a>       | 74.7        | 92.9        | 89.9                 | 93.5        | 14.1        | 27.3                 | 79.6        | 15.8        | 69.7        |
|        | DiAD <a href="#">He et al. (2024b)</a>             | 79.9        | 95.3        | 88.9                 | 88.3        | 2.0         | 6.3                  | 62.1        | 3.2         | 60.4        |
|        | ViTAD <a href="#">Zhang et al. (2023a)</a>         | 79.4        | 94.4        | <b>90.8</b>          | 94.0        | 14.2        | 25.6                 | 80.7        | 14.7        | 70.9        |
|        | InvAD <a href="#">Zhang et al. (2024a)</a>         | <b>87.4</b> | <b>96.8</b> | <b>91.6</b>          | 93.8        | 18.9        | 30.1                 | 81.3        | 17.7        | 74.0        |
|        | InvAD-lite <a href="#">Zhang et al. (2024a)</a>    | 86.4        | 96.5        | 90.5                 | 94.9        | 24.2        | 32.9                 | 83.6        | 19.7        | 75.0        |
|        | MambaAD <a href="#">He et al. (2024a)</a>          | 84.3        | 95.9        | 89.9                 | <b>95.3</b> | 25.2        | 33.6                 | <b>84.8</b> | 20.2        | 74.9        |
|        | Hybrid UniAD <a href="#">You et al. (2022)</a>     | 75.0        | 93.2        | 88.9                 | 83.2        | 9.8         | 22.4                 | 57.1        | 12.6        | 64.4        |
|        | RD++ <a href="#">Tien et al. (2023)</a>            | 69.2        | 91.5        | 89.0                 | 92.4        | 14.7        | 26.6                 | 75.8        | 15.4        | 67.8        |
|        | DesTSeg <a href="#">Zhang et al. (2023c)</a>       | 85.0        | 96.4        | 89.8                 | 85.5        | <b>44.7</b> | <b>49.6</b>          | 74.4        | <b>33.0</b> | <b>77.0</b> |
|        | Aug. DRAEM <a href="#">Zavrtanik et al. (2021)</a> | 48.5        | 82.0        | 89.1                 | 47.4        | 0.6         | 2.3                  | 19.3        | 1.2         | 45.3        |
|        | SimpleNet <a href="#">Liu et al. (2023)</a>        | 65.4        | 87.9        | 89.1                 | 94.3        | 5.8         | 12.1                 | 80.3        | 6.5         | 64.5        |
|        | Emb. CFA <a href="#">Lee et al. (2022)</a>         | 61.2        | 87.5        | 89.4                 | 43.3        | 1.7         | 7.6                  | 24.4        | 4.0         | 49.3        |
|        | PatchCore <a href="#">Roth et al. (2022)</a>       | 75.2        | 92.7        | 91.2                 | 98.2        | 26.4        | 32.4                 | 93.3        | 19.3        | 74.5        |
| peach  | CFLOW-AD <a href="#">Gudovskiy et al. (2022)</a>   | 74.4        | 91.8        | 90.5                 | 97.9        | 16.2        | 18.4                 | 92.3        | 10.2        | 70.9        |
|        | PyramidalFlow <a href="#">Lei et al. (2023)</a>    | 68.7        | 90.0        | 89.6                 | 95.2        | 6.1         | 11.7                 | 83.8        | 6.2         | 66.0        |
|        | Rec. RD <a href="#">Deng &amp; Li (2022)</a>       | 64.3        | 86.3        | 91.7                 | 98.3        | 12.9        | 20.5                 | 93.2        | 11.4        | 68.5        |
|        | DiAD <a href="#">He et al. (2024b)</a>             | <b>92.2</b> | 94.1        | <b>97.7</b>          | 95.6        | 4.3         | 8.7                  | 84.7        | 4.5         | 68.2        |
|        | ViTAD <a href="#">Zhang et al. (2023a)</a>         | 61.2        | 87.2        | 89.1                 | 98.0        | 18.5        | 24.8                 | 92.0        | 14.1        | 68.7        |
|        | InvAD <a href="#">Zhang et al. (2024a)</a>         | 82.5        | 94.2        | 93.3                 | 99.2        | 36.9        | 39.5                 | 96.8        | 24.6        | 79.0        |
|        | InvAD-lite <a href="#">Zhang et al. (2024a)</a>    | 85.6        | 96.1        | 90.6                 | 99.0        | 33.2        | 36.9                 | 95.6        | 22.6        | 78.5        |
|        | MambaAD <a href="#">He et al. (2024a)</a>          | 89.5        | <b>96.9</b> | 94.2                 | <b>99.4</b> | 44.0        | 44.3                 | <b>97.2</b> | 28.5        | <b>82.4</b> |
|        | Hybrid UniAD <a href="#">You et al. (2022)</a>     | 70.0        | 89.8        | 91.2                 | 98.0        | 18.5        | 23.5                 | 92.6        | 13.3        | 70.9        |
|        | RD++ <a href="#">Tien et al. (2023)</a>            | 73.0        | 89.2        | 92.6                 | 98.8        | 22.4        | 29.9                 | 94.7        | 17.6        | 73.2        |
|        | DesTSeg <a href="#">Zhang et al. (2023c)</a>       | 80.3        | 94.9        | 89.8                 | 84.9        | <b>46.6</b> | <b>46.6</b>          | 70.6        | <b>30.4</b> | 75.3        |
|        | Aug. DRAEM <a href="#">Zavrtanik et al. (2021)</a> | 49.0        | 82.9        | 89.3                 | 58.8        | 0.9         | 3.3                  | 36.1        | 1.7         | 49.3        |
|        | SimpleNet <a href="#">Liu et al. (2023)</a>        | 61.1        | 86.8        | 89.3                 | 95.4        | 3.2         | 8.0                  | 85.0        | 4.2         | 63.5        |
|        | Emb. CFA <a href="#">Lee et al. (2022)</a>         | 41.6        | 75.9        | 89.3                 | 14.3        | 0.5         | 1.4                  | 6.9         | 0.7         | 37.4        |
|        | PatchCore <a href="#">Roth et al. (2022)</a>       | 56.8        | 83.9        | 90.2                 | 98.9        | 9.8         | 17.0                 | 96.0        | 9.3         | 66.2        |
|        | CFLOW-AD <a href="#">Gudovskiy et al. (2022)</a>   | 63.9        | 86.8        | 89.3                 | 98.5        | 10.3        | 13.8                 | 95.0        | 7.4         | 67.2        |
|        | PyramidalFlow <a href="#">Lei et al. (2023)</a>    | 62.3        | 87.3        | 90.5                 | 97.0        | 8.2         | 15.1                 | 90.5        | 8.2         | 66.4        |
| potato | Rec. RD <a href="#">Deng &amp; Li (2022)</a>       | 62.9        | 87.4        | 91.1                 | <b>99.1</b> | 14.6        | 21.7                 | 96.4        | 12.2        | 69.2        |
|        | DiAD <a href="#">He et al. (2024b)</a>             | <b>87.9</b> | <b>97.0</b> | <b>93.0</b>          | 98.5        | 8.4         | 14.1                 | 94.7        | 7.6         | 70.5        |
|        | ViTAD <a href="#">Zhang et al. (2023a)</a>         | 57.9        | 86.4        | 89.8                 | 98.8        | 13.0        | 18.2                 | 95.6        | 10.0        | 67.2        |
|        | InvAD <a href="#">Zhang et al. (2024a)</a>         | 67.0        | 90.2        | 90.6                 | <b>99.1</b> | 15.7        | <b>23.6</b>          | 96.4        | <b>13.4</b> | <b>70.7</b> |
|        | InvAD-lite <a href="#">Zhang et al. (2024a)</a>    | 63.3        | 87.8        | 90.4                 | 98.9        | 11.6        | 17.5                 | 95.2        | 9.6         | 68.2        |
|        | MambaAD <a href="#">He et al. (2024a)</a>          | 58.6        | 85.3        | 90.2                 | 99.0        | <b>16.4</b> | 22.8                 | 95.5        | 12.9        | 68.2        |
|        | Hybrid UniAD <a href="#">You et al. (2022)</a>     | 51.6        | 82.7        | 89.3                 | 97.9        | 7.2         | 11.9                 | 92.6        | 6.3         | 63.5        |
|        | RD++ <a href="#">Tien et al. (2023)</a>            | 62.3        | 88.0        | 90.1                 | <b>99.1</b> | 15.2        | 22.1                 | <b>96.5</b> | 12.4        | 69.2        |
|        | DesTSeg <a href="#">Zhang et al. (2023c)</a>       | 64.7        | 89.2        | 90.2                 | 54.3        | 12.8        | 10.9                 | 21.7        | 5.7         | 53.1        |

Table A62: Benchmarked results on MVTec 3D dataset [Bergmann et al. \(2022b\)](#) by the suggested metrics in Sec. 3.3.

|      | Method                                             | Image-level |             |                      | Pixel-level |             |                      | mAU-PRO     | mIoU-max    | mAD         |
|------|----------------------------------------------------|-------------|-------------|----------------------|-------------|-------------|----------------------|-------------|-------------|-------------|
|      |                                                    | mAU-ROC     | mAP         | mF <sub>1</sub> -max | mAU-ROC     | mAP         | mF <sub>1</sub> -max |             |             |             |
| rope | Aug. DRAEM <a href="#">Zavrtanik et al. (2021)</a> | 54.8        | 67.5        | 82.4                 | 41.6        | 0.8         | 1.0                  | 18.6        | 0.5         | 41.9        |
|      | SimpleNet <a href="#">Liu et al. (2023)</a>        | 95.5        | 98.2        | 92.9                 | 98.9        | 41.7        | 46.1                 | 90.4        | 30.0        | 82.4        |
|      | Emb. CFA <a href="#">Lee et al. (2022)</a>         | 93.0        | 97.2        | 92.4                 | 89.8        | 38.0        | 45.6                 | 70.3        | 29.6        | 77.6        |
|      | PatchCore <a href="#">Roth et al. (2022)</a>       | 96.7        | 98.7        | 95.5                 | <b>99.6</b> | <b>55.6</b> | <b>56.9</b>          | 97.4        | <b>39.7</b> | <b>87.2</b> |
|      | CFLOW-AD <a href="#">Gudovskiy et al. (2022)</a>   | 93.8        | 97.6        | 92.2                 | 99.3        | 43.6        | 47.2                 | 95.4        | 30.9        | 83.0        |
|      | PyramidalFlow <a href="#">Lei et al. (2023)</a>    | 15.9        | 51.0        | 81.2                 | 79.2        | 1.1         | 1.9                  | 43.2        | 1.0         | 40.4        |
|      | Rec. RD <a href="#">Deng &amp; Li (2022)</a>       | 96.0        | 98.4        | 93.1                 | <b>99.6</b> | 48.2        | 53.8                 | <b>97.7</b> | 36.8        | 85.3        |
|      | DiAD <a href="#">He et al. (2024b)</a>             | 76.9        | 86.1        | 85.1                 | 94.5        | 6.8         | 13.8                 | 74.5        | 7.4         | 62.5        |
|      | ViTAD <a href="#">Zhang et al. (2023a)</a>         | 97.0        | 98.9        | 95.6                 | 98.5        | 41.3        | 42.7                 | 89.0        | 27.1        | 82.5        |
|      | InvAD <a href="#">Zhang et al. (2024a)</a>         | 96.0        | 98.5        | 95.5                 | <b>99.6</b> | 52.4        | 56.0                 | 96.5        | 38.9        | 86.4        |
|      | InvAD-lite <a href="#">Zhang et al. (2024a)</a>    | 95.4        | 98.2        | 94.7                 | 99.2        | 45.1        | 46.8                 | 95.4        | 30.5        | 83.9        |
|      | MambaAD <a href="#">He et al. (2024a)</a>          | 95.4        | 98.0        | 93.1                 | 99.3        | 49.2        | 48.9                 | 95.8        | 32.4        | 84.4        |
|      | Hybrid UniAD <a href="#">You et al. (2022)</a>     | <b>97.4</b> | <b>99.0</b> | <b>96.2</b>          | 99.3        | 39.4        | 45.5                 | 96.5        | 29.5        | 83.9        |
|      | RD++ <a href="#">Tien et al. (2023)</a>            | 95.4        | 98.2        | 94.2                 | <b>99.6</b> | 49.2        | 54.1                 | 97.6        | 37.1        | 85.5        |
|      | DesTSeg <a href="#">Zhang et al. (2023c)</a>       | 94.1        | 97.9        | 93.3                 | 96.9        | <b>55.6</b> | 56.8                 | 92.3        | 39.6        | 85.2        |
|      | Aug. DRAEM <a href="#">Zavrtanik et al. (2021)</a> | 77.4        | 89.3        | <b>93.5</b>          | 55.1        | 0.3         | 0.9                  | 22.9        | 0.5         | 53.3        |
|      | SimpleNet <a href="#">Liu et al. (2023)</a>        | 68.4        | 87.4        | 89.0                 | 86.0        | 5.0         | 10.0                 | 59.0        | 5.3         | 60.8        |
|      | Emb. CFA <a href="#">Lee et al. (2022)</a>         | 75.9        | 92.9        | 87.4                 | 48.8        | 0.7         | 1.7                  | 17.8        | 0.8         | 51.3        |
| tire | PatchCore <a href="#">Roth et al. (2022)</a>       | 80.1        | 93.6        | 87.9                 | 99.1        | 22.6        | 31.1                 | 95.8        | 18.4        | 74.7        |
|      | CFLOW-AD <a href="#">Gudovskiy et al. (2022)</a>   | 58.0        | 83.3        | 87.9                 | 97.6        | 7.7         | 14.8                 | 91.0        | 8.0         | 64.6        |
|      | PyramidalFlow <a href="#">Lei et al. (2023)</a>    | 56.6        | 83.6        | 88.3                 | 94.7        | 7.2         | 13.9                 | 82.5        | 7.4         | 62.9        |
|      | Rec. RD <a href="#">Deng &amp; Li (2022)</a>       | 76.8        | 91.6        | 89.1                 | 99.1        | 18.9        | 28.6                 | 96.0        | 16.7        | 73.2        |
|      | DiAD <a href="#">He et al. (2024b)</a>             | 57.7        | 78.0        | 87.4                 | 93.2        | 4.9         | 9.6                  | 80.6        | 5.0         | 58.7        |
|      | ViTAD <a href="#">Zhang et al. (2023a)</a>         | 71.0        | 89.2        | 88.7                 | 97.6        | 17.0        | 28.2                 | 89.1        | 16.4        | 70.5        |
|      | InvAD <a href="#">Zhang et al. (2024a)</a>         | 89.7        | 96.8        | 91.0                 | <b>99.5</b> | 31.3        | 39.6                 | <b>97.7</b> | 24.7        | 79.8        |
|      | InvAD-lite <a href="#">Zhang et al. (2024a)</a>    | <b>91.5</b> | <b>97.6</b> | 93.2                 | 99.4        | <b>42.9</b> | 46.5                 | 97.0        | 30.3        | <b>82.8</b> |
|      | MambaAD <a href="#">He et al. (2024a)</a>          | 88.2        | 96.3        | 92.3                 | <b>99.5</b> | 42.3        | <b>47.2</b>          | 97.1        | <b>30.9</b> | 81.9        |
|      | Hybrid UniAD <a href="#">You et al. (2022)</a>     | 72.8        | 91.3        | 88.8                 | 98.1        | 14.0        | 24.6                 | 90.9        | 14.0        | 70.6        |
|      | RD++ <a href="#">Tien et al. (2023)</a>            | 76.5        | 92.1        | 88.0                 | 99.2        | 20.3        | 27.7                 | 96.4        | 16.1        | 73.2        |
|      | DesTSeg <a href="#">Zhang et al. (2023c)</a>       | 85.6        | 95.9        | 90.1                 | 84.3        | 40.9        | 42.5                 | 65.1        | 27.0        | 74.4        |
|      | Aug. DRAEM <a href="#">Zavrtanik et al. (2021)</a> | 49.2        | 79.4        | 89.0                 | 50.7        | 0.7         | 2.2                  | 23.4        | 1.1         | 45.9        |
|      | SimpleNet <a href="#">Liu et al. (2023)</a>        | 74.9        | 91.8        | 90.2                 | 94.0        | 14.4        | 21.4                 | 79.2        | 12.4        | 68.9        |
|      | Emb. CFA <a href="#">Lee et al. (2022)</a>         | 60.1        | 86.3        | 89.5                 | 52.0        | 7.0         | 11.9                 | 28.7        | 6.9         | 51.8        |
|      | PatchCore <a href="#">Roth et al. (2022)</a>       | 84.1        | 95.1        | 92.5                 | <b>98.6</b> | 33.7        | 38.5                 | <b>94.4</b> | 24.5        | 78.4        |
|      | CFLOW-AD <a href="#">Gudovskiy et al. (2022)</a>   | 74.8        | 91.4        | 90.5                 | 96.9        | 21.6        | 26.8                 | 89.2        | 15.9        | 72.1        |
|      | PyramidalFlow <a href="#">Lei et al. (2023)</a>    | 52.5        | 80.8        | 88.6                 | 87.2        | 5.9         | 10.4                 | 68.0        | 5.6         | 58.4        |
| Avg  | Rec. RD <a href="#">Deng &amp; Li (2022)</a>       | 79.3        | 93.0        | 92.3                 | 98.3        | 28.6        | 35.4                 | 93.5        | 22.1        | 76.1        |
|      | DiAD <a href="#">He et al. (2024b)</a>             | 78.8        | 91.3        | 91.7                 | 91.8        | 5.2         | 10.5                 | 75.1        | 5.6         | 63.5        |
|      | ViTAD <a href="#">Zhang et al. (2023a)</a>         | 78.7        | 93.3        | 91.5                 | 98.0        | 27.0        | 33.0                 | 91.3        | 20.2        | 75.1        |
|      | InvAD <a href="#">Zhang et al. (2024a)</a>         | <b>86.3</b> | <b>95.9</b> | <b>93.4</b>          | <b>98.7</b> | <b>36.2</b> | <b>41.1</b>          | <b>94.9</b> | <b>26.4</b> | <b>79.8</b> |
|      | InvAD-lite <a href="#">Zhang et al. (2024a)</a>    | 85.1        | 95.6        | 92.3                 | 98.4        | 34.4        | 39.0                 | 93.4        | 24.6        | <u>78.7</u> |
|      | MambaAD <a href="#">He et al. (2024a)</a>          | 85.8        | 95.5        | 92.6                 | 98.6        | 37.1        | 40.8                 | 94.1        | 26.0        | 79.5        |
|      | Hybrid UniAD <a href="#">You et al. (2022)</a>     | 77.0        | 92.6        | 91.0                 | 96.8        | 23.7        | 30.6                 | 89.4        | 18.6        | 73.5        |
|      | RD++ <a href="#">Tien et al. (2023)</a>            | 80.1        | 93.5        | 92.2                 | 98.4        | 31.5        | 37.2                 | 93.6        | 23.4        | 76.9        |
|      | DesTSeg <a href="#">Zhang et al. (2023c)</a>       | 82.5        | 95.1        | 90.9                 | 82.1        | <b>43.8</b> | <b>45.2</b>          | 65.1        | <b>30.2</b> | 74.3        |

## P DETAILED QUANTITATIVE RESULTS ON MVTEC LOCO DATASET UNDER 300 EPOCHS

Table A63: Benchmarked results on MVTEC LOCO dataset [Bergmann et al. \(2022a\)](#) by the suggested metrics in Sec. 3.3.

|               | Method                                           | Image-level |             |             | Pixel-level |             |             | mAU-PRO     | mIoU-max    | mAD         |
|---------------|--------------------------------------------------|-------------|-------------|-------------|-------------|-------------|-------------|-------------|-------------|-------------|
|               |                                                  | mAU-ROC     | mAP         | $mF_1$ -max | mAU-ROC     | mAP         | $mF_1$ -max |             |             |             |
| breakfast_box | Aug.                                             |             |             |             |             |             |             |             |             |             |
|               | DRAEM <a href="#">Zavrtanik et al. (2021)</a>    | 48.8        | 68.9        | 77.2        | 50.1        | 6.5         | 12.5        | 14.3        | 6.7         | 42.9        |
|               | SimpleNet <a href="#">Liu et al. (2023)</a>      | <b>89.4</b> | <b>94.5</b> | <b>85.9</b> | <b>89.6</b> | <b>58.6</b> | <b>56.1</b> | <b>75.4</b> | <b>39.0</b> | <b>79.9</b> |
|               | Emb.                                             |             |             |             |             |             |             |             |             |             |
|               | CFA <a href="#">Lee et al. (2022)</a>            | 72.0        | 83.2        | 78.7        | 75.6        | 34.3        | 32.6        | 39.1        | 19.5        | 61.7        |
|               | PatchCore <a href="#">Roth et al. (2022)</a>     | 77.1        | 88.4        | 78.0        | 89.4        | 55.4        | 49.3        | <b>76.1</b> | 32.8        | 74.4        |
|               | CFLOW-AD <a href="#">Gudovskiy et al. (2022)</a> | 75.8        | 86.7        | 77.8        | 88.8        | 50.1        | 48.1        | 71.7        | 31.7        | 72.4        |
|               | PyramidalFlow <a href="#">Lei et al. (2023)</a>  | 61.2        | 78.0        | 77.2        | 70.6        | 34.9        | 32.5        | 34.4        | 19.4        | 57.6        |
|               | Rec.                                             |             |             |             |             |             |             |             |             |             |
|               | RD <a href="#">Deng &amp; Li (2022)</a>          | 63.4        | 79.2        | 77.2        | 83.7        | 26.6        | 35.6        | 63.9        | 21.6        | 62.9        |
|               | DiAD <a href="#">He et al. (2024b)</a>           | 56.8        | 74.3        | 77.2        | 81.6        | 22.9        | 34.2        | 35.5        | 20.6        | 54.6        |
|               | ViTAD <a href="#">Zhang et al. (2023a)</a>       | 75.0        | 86.2        | 78.7        | 88.1        | 52.4        | 50.8        | 65.7        | 34.1        | 72.1        |
|               | InvAD <a href="#">Zhang et al. (2024a)</a>       | 78.8        | 88.5        | 79.2        | <b>89.7</b> | <b>58.9</b> | <b>56.2</b> | <b>75.7</b> | <b>39.1</b> | <b>76.1</b> |
|               | InvAD-lite <a href="#">Zhang et al. (2024a)</a>  | 71.7        | 83.9        | 78.0        | 88.3        | 47.6        | 47.7        | 73.6        | 31.3        | 71.1        |
|               | MambaAD <a href="#">He et al. (2024a)</a>        | 69.3        | 82.9        | 77.2        | 87.4        | 37.0        | 43.6        | 70.7        | 27.9        | 68.1        |
|               | Hybrid                                           |             |             |             |             |             |             |             |             |             |
|               | UniAD <a href="#">You et al. (2022)</a>          | 77.5        | 88.4        | 77.4        | 88.0        | 51.8        | 50.1        | 72.8        | 33.4        | 73.4        |
|               | RD++ <a href="#">Tien et al. (2023)</a>          | 68.2        | 81.7        | 77.2        | 86.6        | 39.7        | 43.9        | 67.0        | 28.2        | 67.5        |
|               | DesTSeg <a href="#">Zhang et al. (2023c)</a>     | 84.0        | 91.1        | 82.2        | 77.5        | <b>64.0</b> | <b>57.9</b> | 68.0        | <b>40.8</b> | 76.3        |
| juice_bottle  | Aug.                                             |             |             |             |             |             |             |             |             |             |
|               | DRAEM <a href="#">Zavrtanik et al. (2021)</a>    | 52.9        | 75.6        | 83.4        | 40.0        | 5.3         | 10.2        | 14.7        | 5.4         | 44.1        |
|               | SimpleNet <a href="#">Liu et al. (2023)</a>      | 96.0        | 98.6        | 93.6        | 86.4        | 47.5        | 55.1        | 84.8        | 38.0        | 82.3        |
|               | Emb.                                             |             |             |             |             |             |             |             |             |             |
|               | CFA <a href="#">Lee et al. (2022)</a>            | 73.0        | 88.2        | 83.4        | 85.1        | 26.9        | 29.1        | 57.4        | 17.1        | 65.6        |
|               | PatchCore <a href="#">Roth et al. (2022)</a>     | 95.2        | 98.3        | 94.1        | 89.9        | <b>56.2</b> | 57.8        | 87.1        | 40.6        | <b>84.3</b> |
|               | CFLOW-AD <a href="#">Gudovskiy et al. (2022)</a> | <b>96.2</b> | <b>98.6</b> | 93.9        | <b>91.7</b> | 44.7        | 47.8        | 85.4        | 31.4        | 81.8        |
|               | PyramidalFlow <a href="#">Lei et al. (2023)</a>  | 77.3        | 91.1        | 83.7        | 51.9        | 36.9        | 10.1        | 17.6        | 5.3         | 56.6        |
|               | Rec.                                             |             |             |             |             |             |             |             |             |             |
|               | RD <a href="#">Deng &amp; Li (2022)</a>          | 89.5        | 96.4        | 90.3        | 89.4        | 47.3        | 48.2        | 84.2        | 31.8        | 79.7        |
|               | DiAD <a href="#">He et al. (2024b)</a>           | 96.0        | 98.3        | 94.1        | 81.1        | 41.0        | 45.2        | 76.0        | 29.2        | 76.0        |
|               | ViTAD <a href="#">Zhang et al. (2023a)</a>       | 90.5        | 96.4        | 88.6        | 88.6        | 48.1        | 49.2        | 83.4        | 32.6        | 79.6        |
|               | InvAD <a href="#">Zhang et al. (2024a)</a>       | 96.1        | 98.6        | 94.8        | <b>90.9</b> | <b>56.1</b> | <b>58.7</b> | <b>88.2</b> | <b>41.5</b> | <b>85.0</b> |
|               | InvAD-lite <a href="#">Zhang et al. (2024a)</a>  | 94.7        | 98.1        | 93.7        | <b>90.8</b> | 52.9        | 56.8        | <b>87.6</b> | 39.7        | 83.8        |
|               | MambaAD <a href="#">He et al. (2024a)</a>        | 93.2        | 97.6        | 91.7        | 89.8        | 53.9        | 55.8        | 86.5        | 38.7        | 82.8        |
|               | Hybrid                                           |             |             |             |             |             |             |             |             |             |
|               | UniAD <a href="#">You et al. (2022)</a>          | 95.4        | 98.3        | 93.2        | 90.7        | 55.5        | <b>58.3</b> | <b>89.3</b> | 41.2        | <b>84.5</b> |
|               | RD++ <a href="#">Tien et al. (2023)</a>          | 90.7        | 96.7        | 89.6        | 90.1        | 49.7        | 52.4        | 84.7        | 35.5        | 80.8        |
|               | DesTSeg <a href="#">Zhang et al. (2023c)</a>     | <b>99.5</b> | <b>99.8</b> | <b>97.9</b> | 79.5        | <b>59.9</b> | <b>59.1</b> | 79.6        | <b>41.9</b> | <b>84.3</b> |
| pushpins      | Aug.                                             |             |             |             |             |             |             |             |             |             |
|               | DRAEM <a href="#">Zavrtanik et al. (2021)</a>    | 62.2        | 66.8        | 72.2        | 53.9        | 0.8         | 1.9         | 11.5        | 1.0         | 42.0        |
|               | SimpleNet <a href="#">Liu et al. (2023)</a>      | 76.5        | 83.6        | 74.9        | 55.8        | 2.7         | 7.4         | 59.6        | 3.8         | 54.9        |
|               | Emb.                                             |             |             |             |             |             |             |             |             |             |
|               | CFA <a href="#">Lee et al. (2022)</a>            | 47.2        | 57.8        | 71.4        | 51.1        | 0.9         | 1.7         | 22.7        | 0.9         | 39.0        |
|               | PatchCore <a href="#">Roth et al. (2022)</a>     | 74.3        | 82.8        | 72.7        | 56.1        | 3.1         | 7.5         | 63.6        | 3.9         | 54.6        |
|               | CFLOW-AD <a href="#">Gudovskiy et al. (2022)</a> | 63.3        | 71.4        | 71.4        | 39.5        | 1.2         | 3.4         | 52.8        | 1.7         | 46.5        |
|               | PyramidalFlow <a href="#">Lei et al. (2023)</a>  | 45.7        | 52.1        | 71.5        | 55.2        | 0.8         | 1.7         | 18.8        | 0.9         | 37.8        |
|               | Rec.                                             |             |             |             |             |             |             |             |             |             |
|               | RD <a href="#">Deng &amp; Li (2022)</a>          | 71.5        | 79.6        | 72.3        | 51.1        | 2.2         | 7.5         | 68.2        | 3.9         | 53.4        |
|               | DiAD <a href="#">He et al. (2024b)</a>           | 69.0        | 73.8        | 72.9        | 61.4        | 1.6         | 4.6         | 49.7        | 2.4         | 47.6        |
|               | ViTAD <a href="#">Zhang et al. (2023a)</a>       | 68.3        | 74.6        | 73.6        | 46.5        | 2.3         | 5.7         | 57.4        | 2.9         | 50.1        |
|               | InvAD <a href="#">Zhang et al. (2024a)</a>       | <b>82.6</b> | <b>88.3</b> | <b>77.9</b> | <b>72.2</b> | 4.2         | <b>9.3</b>  | <b>77.4</b> | <b>4.9</b>  | <b>61.9</b> |
|               | InvAD-lite <a href="#">Zhang et al. (2024a)</a>  | 78.2        | 84.1        | 76.4        | <b>64.0</b> | 3.2         | 8.5         | 70.3        | 4.5         | 58.0        |
|               | MambaAD <a href="#">He et al. (2024a)</a>        | 78.8        | <b>85.1</b> | 76.9        | 61.1        | 2.8         | 8.7         | <b>70.5</b> | <b>4.5</b>  | <b>58.0</b> |
|               | Hybrid                                           |             |             |             |             |             |             |             |             |             |
|               | UniAD <a href="#">You et al. (2022)</a>          | 71.3        | 79.9        | 72.2        | 46.3        | 2.3         | 8.1         | 62.0        | 4.2         | 52.1        |
|               | RD++ <a href="#">Tien et al. (2023)</a>          | 75.7        | 82.7        | 73.4        | 54.1        | 2.7         | 7.7         | 67.4        | 4.0         | <b>55.1</b> |
|               | DesTSeg <a href="#">Zhang et al. (2023c)</a>     | 72.2        | 81.3        | 71.4        | 55.1        | <b>4.3</b>  | <b>10.1</b> | 64.0        | <b>5.3</b>  | 54.2        |
| screw_bag     | Aug.                                             |             |             |             |             |             |             |             |             |             |
|               | DRAEM <a href="#">Zavrtanik et al. (2021)</a>    | 49.1        | 66.4        | 78.4        | 45.6        | 6.0         | 13.8        | 10.6        | 7.4         | 41.8        |
|               | SimpleNet <a href="#">Liu et al. (2023)</a>      | 65.3        | 78.1        | 78.3        | 55.5        | 9.2         | 14.8        | 48.8        | 8.0         | 53.0        |
|               | Emb.                                             |             |             |             |             |             |             |             |             |             |
|               | CFA <a href="#">Lee et al. (2022)</a>            | 48.9        | 65.2        | 78.2        | 51.1        | 8.0         | 13.6        | 26.4        | 7.3         | 44.4        |
|               | PatchCore <a href="#">Roth et al. (2022)</a>     | 70.1        | 82.8        | 78.2        | 72.1        | 13.1        | 22.0        | 62.1        | 12.4        | <b>59.7</b> |
|               | CFLOW-AD <a href="#">Gudovskiy et al. (2022)</a> | 64.8        | 78.7        | 78.4        | 68.9        | 11.4        | 20.6        | <b>66.8</b> | 11.5        | <b>57.9</b> |
|               | PyramidalFlow <a href="#">Lei et al. (2023)</a>  | 54.2        | 66.8        | 78.2        | 49.9        | 5.8         | 13.6        | 15.9        | 7.3         | 43.8        |
|               | Rec.                                             |             |             |             |             |             |             |             |             |             |
|               | RD <a href="#">Deng &amp; Li (2022)</a>          | 63.7        | 78.1        | 78.2        | 71.6        | 12.6        | 21.8        | 52.0        | 12.3        | 56.4        |
|               | DiAD <a href="#">He et al. (2024b)</a>           | <b>81.7</b> | <b>91.1</b> | <b>80.6</b> | 71.4        | 12.0        | 22.2        | 58.9        | 12.5        | <b>59.7</b> |
|               | ViTAD <a href="#">Zhang et al. (2023a)</a>       | 64.1        | 76.9        | 79.6        | 72.4        | 13.1        | 21.6        | 40.9        | 12.1        | 55.3        |
|               | InvAD <a href="#">Zhang et al. (2024a)</a>       | <b>70.3</b> | 82.4        | 78.2        | <b>73.4</b> | <b>13.7</b> | <b>22.8</b> | 52.8        | <b>12.9</b> | <b>58.8</b> |
|               | InvAD-lite <a href="#">Zhang et al. (2024a)</a>  | 63.7        | 77.4        | 78.5        | 72.7        | <b>13.2</b> | 22.4        | 48.1        | 12.6        | 56.2        |
|               | MambaAD <a href="#">He et al. (2024a)</a>        | 62.6        | 76.4        | 78.2        | <b>73.2</b> | <b>13.4</b> | 22.7        | 49.0        | 12.8        | 56.0        |
|               | Hybrid                                           |             |             |             |             |             |             |             |             |             |
|               | UniAD <a href="#">You et al. (2022)</a>          | 65.0        | 77.1        | 78.5        | 67.5        | 11.3        | 19.3        | 62.8        | 10.7        | 56.9        |
|               | RD++ <a href="#">Tien et al. (2023)</a>          | 64.9        | 79.3        | 78.2        | 69.8        | 12.2        | 20.5        | 51.3        | 11.4        | 56.3        |
|               | DesTSeg <a href="#">Zhang et al. (2023c)</a>     | 70.0        | 81.1        | <b>79.0</b> | 50.3        | 8.6         | 13.6        | 46.4        | 7.3         | 53.2        |

Table A64: Benchmarked results on MVTec LOCO dataset [Bergmann et al. \(2022a\)](#) by the suggested metrics in Sec. 3.3.

| Method              |                                                 | Image-level                                      |                                         |         | Pixel-level |      |         | mAU-PRO | mIoU-max | mAD  |      |      |
|---------------------|-------------------------------------------------|--------------------------------------------------|-----------------------------------------|---------|-------------|------|---------|---------|----------|------|------|------|
|                     |                                                 | mAU-ROC                                          | mAP                                     | mF1-max | mAU-ROC     | mAP  | mF1-max |         |          |      |      |      |
| splicing-connectors | Aug.                                            | DRAEM <a href="#">Zavrtanik et al. (2021)</a>    | 44.0                                    | 56.7    | 76.4        | 50.5 | 7.4     | 14.1    | 17.5     | 7.6  | 40.7 |      |
|                     |                                                 | SimpleNet <a href="#">Liu et al. (2023)</a>      | 81.7                                    | 90.9    | 80.0        | 67.0 | 23.5    | 27.2    | 37.6     | 15.8 | 61.5 |      |
|                     | Emb.                                            | CFA <a href="#">Lee et al. (2022)</a>            | 61.6                                    | 74.3    | 76.5        | 60.3 | 12.4    | 16.6    | 36.1     | 9.1  | 51.1 |      |
|                     |                                                 | PatchCore <a href="#">Roth et al. (2022)</a>     | 85.6                                    | 92.9    | 84.4        | 68.1 | 21.5    | 22.3    | 60.8     | 12.6 | 65.4 |      |
|                     |                                                 | CFLOW-AD <a href="#">Gudovskiy et al. (2022)</a> | 80.0                                    | 89.7    | 78.2        | 65.4 | 20.4    | 21.9    | 73.5     | 12.3 | 64.0 |      |
|                     | PyramidalFlow <a href="#">Lei et al. (2023)</a> | 52.3                                             | 64.1                                    | 76.4    | 49.8        | 5.9  | 14.0    | 15.1    | 7.5      | 42.7 |      |      |
|                     |                                                 | Rec.                                             | RD <a href="#">Deng &amp; Li (2022)</a> | 80.5    | 89.6        | 78.9 | 58.0    | 16.4    | 18.0     | 69.0 | 9.9  | 61.7 |
|                     |                                                 |                                                  | DiAD <a href="#">He et al. (2024b)</a>  | 82.3    | 85.5        | 82.7 | 65.2    | 15.6    | 20.2     | 51.7 | 11.2 | 57.6 |
|                     | ViTAD <a href="#">Zhang et al. (2023a)</a>      |                                                  | 82.8                                    | 91.0    | 79.8        | 70.6 | 23.6    | 25.4    | 62.5     | 14.6 | 65.0 |      |
|                     | InvAD <a href="#">Zhang et al. (2024a)</a>      |                                                  | 83.8                                    | 91.6    | 81.7        | 62.4 | 21.4    | 23.7    | 70.1     | 13.4 | 65.0 |      |
|                     | InvAD-lite <a href="#">Zhang et al. (2024a)</a> |                                                  | 81.5                                    | 90.3    | 81.4        | 69.0 | 23.1    | 24.4    | 67.5     | 13.9 | 65.2 |      |
|                     | MambaAD <a href="#">He et al. (2024a)</a>       |                                                  | 87.3                                    | 93.7    | 84.8        | 76.0 | 32.7    | 33.7    | 66.1     | 20.3 | 70.4 |      |
|                     | Hybrid                                          | UniAD <a href="#">You et al. (2022)</a>          | 84.2                                    | 91.6    | 83.0        | 80.5 | 42.2    | 43.2    | 66.6     | 27.5 | 72.2 |      |
|                     |                                                 | RD++ <a href="#">Tien et al. (2023)</a>          | 78.7                                    | 89.0    | 78.1        | 60.0 | 16.6    | 18.0    | 69.3     | 9.9  | 61.5 |      |
|                     |                                                 | DesTSeg <a href="#">Zhang et al. (2023c)</a>     | 80.1                                    | 89.8    | 78.8        | 56.3 | 22.1    | 18.5    | 37.9     | 10.2 | 58.3 |      |
| Avg                 | Aug.                                            | DRAEM <a href="#">Zavrtanik et al. (2021)</a>    | 51.4                                    | 66.9    | 77.5        | 48.0 | 5.2     | 10.5    | 13.7     | 5.6  | 42.3 |      |
|                     |                                                 | SimpleNet <a href="#">Liu et al. (2023)</a>      | 81.8                                    | 89.1    | 82.5        | 70.9 | 28.3    | 32.1    | 61.2     | 20.9 | 66.3 |      |
|                     | Emb.                                            | CFA <a href="#">Lee et al. (2022)</a>            | 60.6                                    | 73.7    | 77.6        | 64.7 | 16.5    | 18.8    | 36.4     | 10.8 | 52.4 |      |
|                     |                                                 | PatchCore <a href="#">Roth et al. (2022)</a>     | 80.5                                    | 89.0    | 81.5        | 75.1 | 29.9    | 31.8    | 69.9     | 20.4 | 67.7 |      |
|                     |                                                 | CFLOW-AD <a href="#">Gudovskiy et al. (2022)</a> | 76.0                                    | 85.0    | 79.9        | 70.9 | 25.6    | 28.4    | 70.0     | 17.7 | 64.5 |      |
|                     | PyramidalFlow <a href="#">Lei et al. (2023)</a> | 58.1                                             | 70.4                                    | 77.4    | 55.5        | 16.8 | 14.4    | 20.4    | 8.1      | 47.7 |      |      |
|                     |                                                 | Rec.                                             | RD <a href="#">Deng &amp; Li (2022)</a> | 73.7    | 84.6        | 79.4 | 70.7    | 21.0    | 26.2     | 67.5 | 15.9 | 62.8 |
|                     |                                                 |                                                  | DiAD <a href="#">He et al. (2024b)</a>  | 77.2    | 84.6        | 81.5 | 72.1    | 18.6    | 25.3     | 54.4 | 15.2 | 59.1 |
|                     | ViTAD <a href="#">Zhang et al. (2023a)</a>      |                                                  | 76.2                                    | 85.0    | 80.1        | 73.2 | 27.9    | 30.6    | 62.0     | 19.3 | 64.4 |      |
|                     | InvAD <a href="#">Zhang et al. (2024a)</a>      |                                                  | 82.3                                    | 89.9    | 82.4        | 77.7 | 30.9    | 34.1    | 72.8     | 22.4 | 69.4 |      |
|                     | InvAD-lite <a href="#">Zhang et al. (2024a)</a> |                                                  | 78.0                                    | 86.8    | 81.6        | 77.0 | 28.0    | 32.0    | 69.4     | 20.4 | 66.9 |      |
|                     | MambaAD <a href="#">He et al. (2024a)</a>       |                                                  | 78.2                                    | 87.1    | 81.8        | 77.5 | 28.0    | 32.9    | 68.6     | 20.8 | 67.1 |      |
|                     | Hybrid                                          | UniAD <a href="#">You et al. (2022)</a>          | 78.7                                    | 87.1    | 80.9        | 74.6 | 32.6    | 35.8    | 70.7     | 23.4 | 67.8 |      |
|                     |                                                 | RD++ <a href="#">Tien et al. (2023)</a>          | 75.7                                    | 85.9    | 79.3        | 72.1 | 24.2    | 28.5    | 67.9     | 17.8 | 64.2 |      |
|                     |                                                 | DesTSeg <a href="#">Zhang et al. (2023c)</a>     | 81.2                                    | 88.6    | 81.8        | 63.7 | 31.8    | 31.9    | 59.2     | 21.1 | 65.3 |      |

## Q DETAILED QUANTITATIVE RESULTS ON VISA DATASET UNDER 300 EPOCHS

Table A65: Benchmarked results on VisA dataset [Zou et al. \(2022\)](#) by the suggested metrics in [Sec. 3.3](#).

|            | Method | Image-level                                      |             |                      | Pixel-level |             |                      | mAU-PRO     | mIoU-max    | mAD         |             |
|------------|--------|--------------------------------------------------|-------------|----------------------|-------------|-------------|----------------------|-------------|-------------|-------------|-------------|
|            |        | mAU-ROC                                          | mAP         | mF <sub>1</sub> -max | mAU-ROC     | mAP         | mF <sub>1</sub> -max |             |             |             |             |
| candle     | Aug.   | DRAEM <a href="#">Zavrtanik et al. (2021)</a>    | 58.1        | 59.6                 | 67.6        | 45.7        | 0.1                  | 0.6         | 16.7        | 0.3         | 38.8        |
|            |        | SimpleNet <a href="#">Liu et al. (2023)</a>      | 83.3        | 85.8                 | 77.7        | 91.3        | 7.6                  | 17.6        | 80.4        | 9.7         | 65.7        |
|            |        | RealNet <a href="#">Zhang et al. (2024c)</a>     | 53.6        | 63.1                 | 66.7        | 53.5        | 8.8                  | 9.0         | 53.6        | 4.7         | 46.2        |
|            | Emb.   | CFA <a href="#">Lee et al. (2022)</a>            | 86.6        | 85.0                 | 80.0        | 79.4        | 2.6                  | 9.0         | 58.0        | 4.7         | 60.6        |
|            |        | CFLOW-AD <a href="#">Gudovskiy et al. (2022)</a> | 92.4        | 93.2                 | 85.4        | 98.8        | 14.7                 | 24.0        | 93.7        | 13.6        | 74.1        |
|            |        | PyramidalFlow <a href="#">Lei et al. (2023)</a>  | 80.6        | 75.9                 | 77.0        | 84.5        | 2.2                  | 7.7         | 79.7        | 4.0         | 60.7        |
|            | Rec.   | RD <a href="#">Deng &amp; Li (2022)</a>          | 91.8        | 92.7                 | 83.9        | 99.0        | 19.1                 | 30.5        | 95.2        | 18.0        | 75.2        |
|            |        | DiAD <a href="#">He et al. (2024b)</a>           | <b>99.3</b> | <b>99.3</b>          | <b>96.0</b> | 80.1        | 1.0                  | 2.6         | 41.4        | 1.3         | 60.0        |
|            |        | ViTAD <a href="#">Zhang et al. (2023a)</a>       | 90.0        | 91.5                 | 82.4        | 96.1        | 17.1                 | 27.6        | 86.5        | 16.0        | 72.4        |
|            |        | InvAD <a href="#">Zhang et al. (2024a)</a>       | 95.2        | 94.9                 | 92.2        | <b>99.3</b> | 23.3                 | 33.5        | 95.7        | 20.1        | 78.5        |
|            |        | InvAD-lite <a href="#">Zhang et al. (2024a)</a>  | 97.2        | 97.5                 | 92.9        | 99.1        | 20.5                 | 30.9        | <b>96.2</b> | 18.3        | 78.8        |
|            |        | MambaAD <a href="#">He et al. (2024a)</a>        | 95.5        | 95.8                 | 89.6        | 99.1        | 22.4                 | 32.4        | 96.1        | 19.3        | 78.1        |
|            | Hybrid | UniAD <a href="#">You et al. (2022)</a>          | 97.3        | 97.4                 | 91.6        | <b>99.3</b> | 24.4                 | 33.9        | 94.8        | 20.4        | <b>79.3</b> |
|            |        | RD++ <a href="#">Tien et al. (2023)</a>          | 92.7        | 92.8                 | 87.6        | <b>99.3</b> | 25.5                 | 36.3        | 95.4        | 22.2        | 77.6        |
|            |        | DesTSeg <a href="#">Zhang et al. (2023c)</a>     | 89.8        | 89.8                 | 83.0        | 74.5        | <b>39.5</b>          | <b>41.4</b> | 49.9        | <b>26.1</b> | 69.4        |
| capsules   | Aug.   | DRAEM <a href="#">Zavrtanik et al. (2021)</a>    | 71.9        | 80.7                 | 77.5        | 39.1        | 0.3                  | 1.0         | 10.7        | 0.5         | 44.7        |
|            |        | SimpleNet <a href="#">Liu et al. (2023)</a>      | 66.9        | 79.4                 | 77.2        | 90.0        | 21.2                 | 28.3        | 57.5        | 16.5        | 61.9        |
|            |        | RealNet <a href="#">Zhang et al. (2024c)</a>     | 81.6        | 90.5                 | 79.8        | 74.6        | 34.2                 | 41.1        | 39.6        | 25.9        | 65.7        |
|            | Emb.   | CFA <a href="#">Lee et al. (2022)</a>            | 59.6        | 70.8                 | 78.7        | 60.6        | 0.5                  | 1.0         | 24.3        | 0.5         | 45.7        |
|            |        | CFLOW-AD <a href="#">Gudovskiy et al. (2022)</a> | 57.5        | 73.8                 | 77.5        | 94.5        | 27.9                 | 27.8        | 65.9        | 16.1        | 61.8        |
|            |        | PyramidalFlow <a href="#">Lei et al. (2023)</a>  | 60.5        | 72.8                 | 77.8        | 81.9        | 2.3                  | 6.5         | 61.3        | 3.3         | 54.2        |
|            | Rec.   | RD <a href="#">Deng &amp; Li (2022)</a>          | 81.0        | 89.7                 | 81.6        | 99.3        | 57.3                 | 59.4        | 91.9        | 42.3        | <u>80.5</u> |
|            |        | DiAD <a href="#">He et al. (2024b)</a>           | 66.7        | 80.5                 | 79.7        | 94.3        | 8.0                  | 16.4        | 55.3        | 8.9         | 57.3        |
|            |        | ViTAD <a href="#">Zhang et al. (2023a)</a>       | 80.2        | 88.2                 | 80.2        | 98.3        | 31.1                 | 41.3        | 76.0        | 26.0        | 72.3        |
|            |        | InvAD <a href="#">Zhang et al. (2024a)</a>       | 87.2        | 92.8                 | 84.5        | <b>99.6</b> | <b>67.1</b>          | <b>61.9</b> | <b>94.9</b> | <b>44.8</b> | <b>84.5</b> |
|            |        | InvAD-lite <a href="#">Zhang et al. (2024a)</a>  | <b>88.8</b> | 92.5                 | <b>87.4</b> | 99.3        | 60.7                 | 59.1        | <b>94.9</b> | 42.0        | 84.0        |
|            |        | MambaAD <a href="#">He et al. (2024a)</a>        | 83.4        | 88.4                 | 83.8        | 98.8        | 32.8                 | 41.6        | 87.6        | 26.2        | 75.2        |
|            | Hybrid | UniAD <a href="#">You et al. (2022)</a>          | 73.5        | 85.6                 | 79.1        | 98.4        | 52.1                 | 53.6        | 80.8        | 36.6        | 75.3        |
|            |        | RD++ <a href="#">Tien et al. (2023)</a>          | 79.5        | 88.6                 | 79.8        | 99.1        | 56.8                 | 59.7        | 91.4        | 42.6        | 79.7        |
|            |        | DesTSeg <a href="#">Zhang et al. (2023c)</a>     | 86.5        | <b>92.9</b>          | 85.6        | 95.7        | 38.7                 | 42.8        | 77.8        | 27.2        | 76.0        |
| cashew     | Aug.   | DRAEM <a href="#">Zavrtanik et al. (2021)</a>    | 19.8        | 54.8                 | 80.0        | 53.0        | 1.5                  | 3.4         | 40.8        | 1.7         | 38.1        |
|            |        | SimpleNet <a href="#">Liu et al. (2023)</a>      | 87.1        | 93.3                 | 87.2        | 98.5        | <b>68.0</b>          | <u>65.2</u> | 85.0        | <u>48.3</u> | <u>84.2</u> |
|            |        | RealNet <a href="#">Zhang et al. (2024c)</a>     | 89.5        | 95.4                 | 86.8        | 53.5        | 25.4                 | 10.1        | 29.0        | 5.3         | 60.0        |
|            | Emb.   | CFA <a href="#">Lee et al. (2022)</a>            | 78.3        | 87.5                 | 83.8        | 82.3        | 23.2                 | 29.5        | 28.8        | 17.3        | 62.1        |
|            |        | CFLOW-AD <a href="#">Gudovskiy et al. (2022)</a> | 95.6        | 98.1                 | 92.7        | <b>99.0</b> | 52.5                 | 54.4        | <b>94.6</b> | 37.4        | 85.3        |
|            |        | PyramidalFlow <a href="#">Lei et al. (2023)</a>  | 89.0        | 93.8                 | 90.6        | 49.8        | 0.6                  | 2.2         | 15.2        | 1.1         | 54.0        |
|            | Rec.   | RD <a href="#">Deng &amp; Li (2022)</a>          | 93.3        | 96.5                 | 91.5        | 92.3        | 44.9                 | 50.1        | 84.5        | 33.4        | 80.9        |
|            |        | DiAD <a href="#">He et al. (2024b)</a>           | <b>99.8</b> | <b>99.9</b>          | <b>99.0</b> | 89.1        | 45.6                 | 50.1        | 21.5        | 33.4        | 72.1        |
|            |        | ViTAD <a href="#">Zhang et al. (2023a)</a>       | 87.6        | 94.0                 | 87.5        | 98.3        | 62.6                 | 61.4        | 79.3        | 44.3        | 82.6        |
|            |        | InvAD <a href="#">Zhang et al. (2024a)</a>       | 96.0        | 98.3                 | 93.9        | 97.6        | <u>65.5</u>          | <b>65.5</b> | 89.7        | <b>48.7</b> | <b>87.8</b> |
|            |        | InvAD-lite <a href="#">Zhang et al. (2024a)</a>  | 92.7        | 96.4                 | 88.8        | 94.6        | 55.4                 | 57.9        | 88.9        | 40.7        | 83.4        |
|            |        | MambaAD <a href="#">He et al. (2024a)</a>        | 92.5        | 96.3                 | 90.3        | 94.7        | 50.8                 | 55.0        | 86.2        | 37.9        | 82.4        |
|            | Hybrid | UniAD <a href="#">You et al. (2022)</a>          | 90.4        | 95.2                 | 87.7        | 97.9        | 44.5                 | 48.9        | 89.0        | 32.4        | 80.6        |
|            |        | RD++ <a href="#">Tien et al. (2023)</a>          | 93.5        | 96.4                 | 92.7        | 95.9        | 56.3                 | 56.7        | 85.1        | 39.6        | 83.8        |
|            |        | DesTSeg <a href="#">Zhang et al. (2023c)</a>     | 86.6        | 93.1                 | 86.5        | 84.4        | 48.2                 | 52.0        | 55.8        | 35.2        | 74.4        |
| chewinggum | Aug.   | DRAEM <a href="#">Zavrtanik et al. (2021)</a>    | 33.5        | 58.0                 | 79.0        | 32.3        | 0.3                  | 1.1         | 4.2         | 0.6         | 33.2        |
|            |        | SimpleNet <a href="#">Liu et al. (2023)</a>      | 94.6        | 97.6                 | 91.3        | 97.9        | 39.7                 | 45.3        | 74.7        | 29.3        | 79.5        |
|            |        | RealNet <a href="#">Zhang et al. (2024c)</a>     | 89.0        | 95.3                 | 87.0        | 82.2        | 63.8                 | 61.5        | 42.3        | 44.5        | 76.4        |
|            | Emb.   | CFA <a href="#">Lee et al. (2022)</a>            | 75.9        | 87.8                 | 82.7        | 84.4        | 16.6                 | 26.5        | 43.1        | 15.3        | 62.4        |
|            |        | CFLOW-AD <a href="#">Gudovskiy et al. (2022)</a> | 97.2        | 98.8                 | 95.2        | 99.2        | 61.9                 | 60.3        | 87.8        | 43.1        | <u>87.2</u> |
|            |        | PyramidalFlow <a href="#">Lei et al. (2023)</a>  | 74.5        | 84.3                 | 83.3        | 50.1        | 0.7                  | 1.1         | 15.1        | 0.6         | 48.7        |
|            | Rec.   | RD <a href="#">Deng &amp; Li (2022)</a>          | 95.5        | 98.0                 | 93.8        | 98.7        | 58.4                 | 61.0        | 78.1        | 43.9        | 84.9        |
|            |        | DiAD <a href="#">He et al. (2024b)</a>           | 97.6        | 98.4                 | <u>96.6</u> | 68.5        | 15.6                 | 30.6        | 18.6        | 18.0        | 60.8        |
|            |        | ViTAD <a href="#">Zhang et al. (2023a)</a>       | 95.2        | 97.8                 | 92.3        | 97.7        | 60.7                 | 58.5        | 71.4        | 41.3        | 83.6        |
|            |        | InvAD <a href="#">Zhang et al. (2024a)</a>       | <u>97.7</u> | <u>99.0</u>          | <u>95.8</u> | 98.6        | 57.2                 | 59.0        | 80.0        | 41.9        | 85.6        |
|            |        | InvAD-lite <a href="#">Zhang et al. (2024a)</a>  | 97.6        | 99.0                 | 95.3        | 98.3        | 56.7                 | 56.4        | 78.8        | 39.3        | 84.9        |
|            |        | MambaAD <a href="#">He et al. (2024a)</a>        | 97.3        | 98.8                 | 94.7        | 97.3        | 27.4                 | 38.0        | 78.2        | 23.4        | 78.6        |
|            | Hybrid | UniAD <a href="#">You et al. (2022)</a>          | <b>99.1</b> | <b>99.5</b>          | <b>96.8</b> | <b>99.3</b> | 62.4                 | 59.6        | <b>88.2</b> | 42.5        | <b>87.9</b> |
|            |        | RD++ <a href="#">Tien et al. (2023)</a>          | 96.2        | 98.3                 | 93.0        | 98.8        | 58.8                 | 61.8        | 80.1        | 44.7        | 85.4        |
|            |        | DesTSeg <a href="#">Zhang et al. (2023c)</a>     | 96.8        | 98.7                 | 95.3        | 97.5        | <b>78.3</b>          | <b>70.2</b> | 68.4        | <b>54.1</b> | 87.8        |

Table A66: Benchmarked results on VisA dataset [Zou et al. \(2022\)](#) by the suggested metrics in Sec. 3.3.

|           | Method | Image-level                                      |             |                      | Pixel-level |             |                      | mAU-PRO     | mIoU-max    | mAD         |             |
|-----------|--------|--------------------------------------------------|-------------|----------------------|-------------|-------------|----------------------|-------------|-------------|-------------|-------------|
|           |        | mAU-ROC                                          | mAP         | mF <sub>1</sub> -max | mAU-ROC     | mAP         | mF <sub>1</sub> -max |             |             |             |             |
| fryum     | Aug.   | DRAEM <a href="#">Zavrtanik et al. (2021)</a>    | 46.2        | 65.7                 | 80.0        | 51.2        | 3.5                  | 8.7         | 25.5        | 4.6         | 43.1        |
|           |        | SimpleNet <a href="#">Liu et al. (2023)</a>      | 82.0        | 91.5                 | 84.0        | 93.4        | 40.6                 | 41.7        | 78.5        | 26.4        | 74.7        |
|           |        | RealNet <a href="#">Zhang et al. (2024c)</a>     | 80.1        | 90.6                 | 81.0        | 57.0        | 32.4                 | 17.8        | 22.8        | 9.8         | 58.2        |
|           | Emb.   | CFA <a href="#">Lee et al. (2022)</a>            | 65.4        | 81.3                 | 80.6        | 76.7        | 16.2                 | 22.1        | 41.3        | 12.4        | 57.4        |
|           |        | CFLOW-AD <a href="#">Gudovskiy et al. (2022)</a> | 91.2        | 96.0                 | 90.3        | <b>97.6</b> | <b>53.8</b>          | <b>55.8</b> | 87.4        | 38.7        | 83.1        |
|           |        | PyramidalFlow <a href="#">Lei et al. (2023)</a>  | 80.2        | 90.0                 | 82.2        | 89.3        | 19.2                 | 18.3        | 74.5        | 10.1        | 67.2        |
|           | Rec.   | RD <a href="#">Deng &amp; Li (2022)</a>          | 95.8        | 98.1                 | 92.4        | 97.0        | 48.1                 | 51.8        | <b>93.1</b> | 35.0        | 84.0        |
|           |        | DiAD <a href="#">He et al. (2024b)</a>           | <b>97.0</b> | <b>98.3</b>          | <b>95.6</b> | 97.5        | <b>59.0</b>          | <b>61.8</b> | 68.9        | <b>44.7</b> | 82.6        |
|           |        | ViTAD <a href="#">Zhang et al. (2023a)</a>       | 94.3        | 97.5                 | 91.1        | 97.5        | 47.2                 | 52.0        | 88.9        | 35.1        | 82.8        |
|           |        | InvAD <a href="#">Zhang et al. (2024a)</a>       | <b>97.0</b> | <b>98.6</b>          | <b>93.1</b> | 97.5        | 52.5                 | 56.2        | 92.1        | <b>39.1</b> | <b>85.4</b> |
|           |        | InvAD-lite <a href="#">Zhang et al. (2024a)</a>  | 96.0        | 98.1                 | 92.8        | 97.3        | 50.6                 | 53.2        | <b>93.2</b> | 36.3        | 84.6        |
|           |        | MambaAD <a href="#">He et al. (2024a)</a>        | 96.3        | 98.2                 | 93.1        | 97.1        | 49.7                 | 52.9        | 92.4        | 36.0        | 84.4        |
|           | Hybrid | UniAD <a href="#">You et al. (2022)</a>          | 91.0        | 96.0                 | 87.9        | 97.3        | 45.3                 | 52.4        | 85.5        | 35.5        | 80.9        |
|           |        | RD++ <a href="#">Tien et al. (2023)</a>          | 95.7        | 98.1                 | 92.2        | 97.2        | 49.9                 | 53.6        | 92.0        | 36.6        | 84.3        |
|           |        | DesTSeg <a href="#">Zhang et al. (2023c)</a>     | 92.3        | 96.6                 | 88.5        | 67.0        | 47.6                 | 41.3        | 35.4        | 26.0        | 70.1        |
| macaroni1 | Aug.   | DRAEM <a href="#">Zavrtanik et al. (2021)</a>    | 89.4        | 86.6                 | 81.5        | 38.7        | 0.0                  | 0.1         | 6.2         | 0.0         | 48.5        |
|           |        | SimpleNet <a href="#">Liu et al. (2023)</a>      | 65.8        | 60.9                 | 65.6        | 91.4        | 1.5                  | 4.6         | 66.5        | 2.4         | 52.5        |
|           |        | RealNet <a href="#">Zhang et al. (2024c)</a>     | 69.9        | 75.2                 | 66.7        | 54.7        | 14.6                 | 12.4        | 19.7        | 6.6         | 48.0        |
|           | Emb.   | CFA <a href="#">Lee et al. (2022)</a>            | 56.0        | 57.4                 | 66.9        | 87.7        | 0.4                  | 2.4         | 56.0        | 1.2         | 48.4        |
|           |        | CFLOW-AD <a href="#">Gudovskiy et al. (2022)</a> | 81.8        | 78.7                 | 75.7        | 99.1        | 7.9                  | 13.2        | 95.2        | 7.1         | 66.3        |
|           |        | PyramidalFlow <a href="#">Lei et al. (2023)</a>  | 57.6        | 53.5                 | 70.0        | 91.0        | 0.5                  | 2.0         | 60.0        | 1.0         | 49.4        |
|           | Rec.   | RD <a href="#">Deng &amp; Li (2022)</a>          | 95.2        | 93.7                 | 88.8        | <b>99.8</b> | <b>23.6</b>          | <b>31.1</b> | 97.2        | 18.4        | <b>77.7</b> |
|           |        | DiAD <a href="#">He et al. (2024b)</a>           | <b>96.3</b> | <b>94.9</b>          | <b>92.4</b> | 55.2        | 0.0                  | 0.1         | 3.6         | 0.0         | 48.9        |
|           |        | ViTAD <a href="#">Zhang et al. (2023a)</a>       | 85.3        | 83.5                 | 76.0        | 98.6        | 7.1                  | 15.4        | 90.7        | 8.3         | 67.3        |
|           |        | InvAD <a href="#">Zhang et al. (2024a)</a>       | 95.2        | 93.4                 | 88.7        | 99.7        | 21.8                 | 30.5        | 97.3        | 18.0        | 77.4        |
|           |        | InvAD-lite <a href="#">Zhang et al. (2024a)</a>  | 94.2        | 92.5                 | 86.2        | <b>99.8</b> | 19.3                 | 27.7        | <b>97.7</b> | 16.1        | 76.0        |
|           |        | MambaAD <a href="#">He et al. (2024a)</a>        | 91.9        | 89.4                 | 83.2        | 99.3        | 13.4                 | 21.9        | 95.4        | 12.3        | 72.8        |
|           | Hybrid | UniAD <a href="#">You et al. (2022)</a>          | 88.1        | 86.2                 | 80.0        | 99.4        | 10.8                 | 20.1        | 95.6        | 11.2        | 70.6        |
|           |        | RD++ <a href="#">Tien et al. (2023)</a>          | 92.8        | 91.2                 | 86.5        | 99.7        | <b>24.0</b>          | <b>32.4</b> | 96.7        | <b>19.3</b> | <b>76.7</b> |
|           |        | DesTSeg <a href="#">Zhang et al. (2023c)</a>     | 93.5        | 89.9                 | 90.6        | 73.3        | 15.2                 | 25.7        | 36.6        | 14.7        | 64.5        |
| macaroni2 | Aug.   | DRAEM <a href="#">Zavrtanik et al. (2021)</a>    | 57.7        | 53.4                 | 63.4        | 58.9        | 0.0                  | 0.1         | 25.1        | 0.1         | 39.6        |
|           |        | SimpleNet <a href="#">Liu et al. (2023)</a>      | 57.9        | 53.2                 | 63.3        | 89.8        | 0.4                  | 1.7         | 66.4        | 0.9         | 48.9        |
|           |        | RealNet <a href="#">Zhang et al. (2024c)</a>     | 59.0        | 60.2                 | 67.3        | 53.5        | 6.8                  | 8.3         | 20.1        | 4.3         | 42.2        |
|           | Emb.   | CFA <a href="#">Lee et al. (2022)</a>            | 58.6        | 56.7                 | 66.9        | 82.1        | 0.1                  | 0.8         | 48.5        | 0.4         | 46.8        |
|           |        | CFLOW-AD <a href="#">Gudovskiy et al. (2022)</a> | 67.1        | 65.5                 | 65.6        | 97.4        | 1.9                  | 6.3         | 89.9        | 3.3         | 57.5        |
|           |        | PyramidalFlow <a href="#">Lei et al. (2023)</a>  | 62.5        | 59.1                 | 71.6        | 83.2        | 0.1                  | 0.2         | 35.0        | 0.1         | 47.0        |
|           | Rec.   | RD <a href="#">Deng &amp; Li (2022)</a>          | 85.6        | 79.3                 | 81.0        | 99.6        | <b>12.3</b>          | <b>20.2</b> | 97.0        | <b>11.3</b> | 69.6        |
|           |        | DiAD <a href="#">He et al. (2024b)</a>           | 56.0        | 46.8                 | 68.2        | 56.8        | 0.0                  | 0.1         | 15.8        | 0.0         | 34.8        |
|           |        | ViTAD <a href="#">Zhang et al. (2023a)</a>       | 77.2        | 70.3                 | 74.2        | 98.1        | 3.5                  | 9.5         | 88.1        | 5.0         | 61.8        |
|           |        | InvAD <a href="#">Zhang et al. (2024a)</a>       | <b>88.3</b> | <b>83.9</b>          | <b>83.2</b> | 99.6        | <b>11.4</b>          | <b>19.1</b> | 97.8        | 10.6        | <b>71.1</b> |
|           |        | InvAD-lite <a href="#">Zhang et al. (2024a)</a>  | 88.1        | <b>84.6</b>          | 80.4        | <b>99.7</b> | <b>11.7</b>          | <b>19.8</b> | <b>98.2</b> | <b>11.0</b> | 70.9        |
|           |        | MambaAD <a href="#">He et al. (2024a)</a>        | 80.5        | 74.3                 | 75.7        | 96.5        | 2.0                  | 7.3         | 87.1        | 3.8         | 62.5        |
|           | Hybrid | UniAD <a href="#">You et al. (2022)</a>          | 81.3        | 81.1                 | 71.9        | 98.3        | 5.6                  | 13.2        | 92.8        | 7.0         | 65.3        |
|           |        | RD++ <a href="#">Tien et al. (2023)</a>          | 82.8        | 76.9                 | 80.2        | 99.5        | 9.6                  | 18.3        | 96.2        | 10.1        | 67.9        |
|           |        | DesTSeg <a href="#">Zhang et al. (2023c)</a>     | 72.2        | 70.4                 | 73.1        | 62.8        | 10.3                 | 17.2        | 36.0        | 9.4         | 51.7        |
| peb1      | Aug.   | DRAEM <a href="#">Zavrtanik et al. (2021)</a>    | 80.6        | 78.0                 | 78.2        | 53.2        | 0.6                  | 0.9         | 21.4        | 0.5         | 49.0        |
|           |        | SimpleNet <a href="#">Liu et al. (2023)</a>      | 85.2        | 87.0                 | 78.1        | 98.6        | 73.1                 | 69.7        | 79.0        | 53.5        | 81.8        |
|           |        | RealNet <a href="#">Zhang et al. (2024c)</a>     | 82.7        | 83.6                 | 77.5        | 73.6        | 40.1                 | 43.6        | 27.3        | 27.9        | 63.7        |
|           | Emb.   | CFA <a href="#">Lee et al. (2022)</a>            | 58.0        | 63.9                 | 66.7        | 88.4        | 19.7                 | 29.9        | 39.1        | 17.5        | 53.6        |
|           |        | CFLOW-AD <a href="#">Gudovskiy et al. (2022)</a> | 94.9        | 95.2                 | 88.2        | 99.1        | 73.0                 | 68.8        | 88.3        | 52.4        | 87.5        |
|           |        | PyramidalFlow <a href="#">Lei et al. (2023)</a>  | 67.7        | 64.6                 | 71.9        | 53.4        | 34.1                 | 11.3        | 15.3        | 6.0         | 48.3        |
|           | Rec.   | RD <a href="#">Deng &amp; Li (2022)</a>          | 96.4        | 96.4                 | 91.8        | 99.5        | 66.8                 | 62.2        | 96.1        | 45.1        | 88.0        |
|           |        | DiAD <a href="#">He et al. (2024b)</a>           | 91.7        | 94.1                 | 89.5        | 95.7        | 27.7                 | 39.5        | 56.5        | 24.6        | 70.7        |
|           |        | ViTAD <a href="#">Zhang et al. (2023a)</a>       | 95.6        | 94.1                 | 91.3        | 99.4        | 65.6                 | 61.9        | 89.2        | 44.8        | 86.3        |
|           |        | InvAD <a href="#">Zhang et al. (2024a)</a>       | 96.8        | 96.2                 | 92.9        | <b>99.8</b> | <b>80.3</b>          | <b>75.4</b> | <b>96.7</b> | <b>60.5</b> | <b>91.7</b> |
|           |        | InvAD-lite <a href="#">Zhang et al. (2024a)</a>  | <b>97.7</b> | <b>97.2</b>          | <b>94.2</b> | <b>99.8</b> | 79.3                 | 73.5        | <b>97.1</b> | 58.1        | <b>91.9</b> |
|           |        | MambaAD <a href="#">He et al. (2024a)</a>        | 96.0        | 94.7                 | 94.1        | <b>99.8</b> | 79.8                 | 72.8        | 94.9        | 57.2        | 90.9        |
|           | Hybrid | UniAD <a href="#">You et al. (2022)</a>          | 96.3        | 95.5                 | 92.8        | 99.4        | 68.1                 | 63.3        | 90.5        | 46.3        | 87.6        |
|           |        | RD++ <a href="#">Tien et al. (2023)</a>          | 96.3        | 96.0                 | 90.9        | 99.4        | 64.9                 | 59.1        | 95.5        | 42.0        | 87.1        |
|           |        | DesTSeg <a href="#">Zhang et al. (2023c)</a>     | 78.6        | 77.3                 | 74.5        | 96.0        | 66.5                 | 64.3        | 68.6        | 47.3        | 75.3        |



Table A67: Benchmarked results on VisA dataset Zou et al. (2022) by the suggested metrics in Sec. 3.3.

|            | Method | Image-level                                      |      |                      | Pixel-level |      |                      | mAU-PRO | mIoU-max | mAD  |      |
|------------|--------|--------------------------------------------------|------|----------------------|-------------|------|----------------------|---------|----------|------|------|
|            |        | mAU-ROC                                          | mAP  | mF <sub>1</sub> -max | mAU-ROC     | mAP  | mF <sub>1</sub> -max |         |          |      |      |
| pcb2       | Aug.   | DRAEM <a href="#">Zavrtanik et al. (2021)</a>    | 35.0 | 44.1                 | 66.7        | 44.9 | 0.2                  | 0.4     | 10.0     | 0.2  | 31.2 |
|            |        | SimpleNet <a href="#">Liu et al. (2023)</a>      | 82.5 | 83.8                 | 75.6        | 94.9 | 7.2                  | 15.1    | 76.0     | 8.2  | 64.5 |
|            |        | RealNet <a href="#">Zhang et al. (2024c)</a>     | 87.0 | 89.3                 | 79.2        | 72.2 | 13.9                 | 23.0    | 40.3     | 13.0 | 61.3 |
|            | Emb.   | CFA <a href="#">Lee et al. (2022)</a>            | 57.2 | 65.9                 | 66.7        | 80.0 | 2.7                  | 7.5     | 47.7     | 3.9  | 48.9 |
|            |        | CFLOW-AD <a href="#">Gudovskiy et al. (2022)</a> | 92.1 | 93.0                 | 85.6        | 96.5 | 12.6                 | 18.9    | 82.5     | 10.5 | 71.4 |
|            |        | PyramidalFlow <a href="#">Lei et al. (2023)</a>  | 66.8 | 71.1                 | 68.7        | 92.7 | 7.4                  | 8.6     | 74.9     | 4.5  | 57.4 |
|            | Rec.   | RD <a href="#">Deng &amp; Li (2022)</a>          | 97.3 | 96.9                 | 94.2        | 97.7 | 21.1                 | 30.1    | 91.7     | 17.7 | 78.1 |
|            |        | DiAD <a href="#">He et al. (2024b)</a>           | 89.9 | 91.7                 | 82.9        | 82.2 | 4.4                  | 12.2    | 48.1     | 6.5  | 58.8 |
|            |        | ViTAD <a href="#">Zhang et al. (2023a)</a>       | 90.0 | 89.0                 | 84.2        | 98.0 | 12.5                 | 20.4    | 82.6     | 11.4 | 70.6 |
|            |        | InvAD <a href="#">Zhang et al. (2024a)</a>       | 97.0 | 97.3                 | 93.9        | 99.1 | 15.7                 | 23.4    | 92.8     | 13.2 | 76.9 |
|            |        | InvAD-lite <a href="#">Zhang et al. (2024a)</a>  | 96.2 | 96.4                 | 90.1        | 99.0 | 11.7                 | 23.4    | 92.5     | 13.3 | 75.4 |
|            |        | MambaAD <a href="#">He et al. (2024a)</a>        | 96.1 | 96.3                 | 91.0        | 99.0 | 14.2                 | 24.1    | 91.2     | 13.7 | 75.8 |
|            | Hybrid | UniAD <a href="#">You et al. (2022)</a>          | 93.5 | 94.1                 | 87.2        | 98.3 | 13.0                 | 19.5    | 86.0     | 10.8 | 72.9 |
|            |        | RD++ <a href="#">Tien et al. (2023)</a>          | 97.9 | 98.3                 | 96.0        | 98.0 | 25.5                 | 33.4    | 91.7     | 20.0 | 79.8 |
|            |        | DesTSeg <a href="#">Zhang et al. (2023c)</a>     | 82.8 | 83.2                 | 78.1        | 94.4 | 19.1                 | 24.0    | 69.8     | 13.6 | 66.6 |
| pcb3       | Aug.   | DRAEM <a href="#">Zavrtanik et al. (2021)</a>    | 45.6 | 50.3                 | 66.7        | 41.2 | 0.2                  | 0.5     | 11.0     | 0.3  | 33.7 |
|            |        | SimpleNet <a href="#">Liu et al. (2023)</a>      | 84.2 | 86.2                 | 76.6        | 97.3 | 12.9                 | 22.4    | 82.7     | 12.6 | 68.1 |
|            |        | RealNet <a href="#">Zhang et al. (2024c)</a>     | 87.0 | 90.8                 | 82.9        | 76.9 | 24.6                 | 32.2    | 40.9     | 19.2 | 65.3 |
|            | Emb.   | CFA <a href="#">Lee et al. (2022)</a>            | 56.3 | 60.8                 | 67.1        | 85.6 | 13.8                 | 22.5    | 49.6     | 12.7 | 52.1 |
|            |        | CFLOW-AD <a href="#">Gudovskiy et al. (2022)</a> | 80.8 | 84.1                 | 74.2        | 96.4 | 20.6                 | 26.0    | 81.1     | 14.9 | 67.9 |
|            |        | PyramidalFlow <a href="#">Lei et al. (2023)</a>  | 66.3 | 68.6                 | 67.6        | 90.7 | 5.0                  | 12.3    | 58.0     | 6.5  | 54.5 |
|            | Rec.   | RD <a href="#">Deng &amp; Li (2022)</a>          | 96.8 | 96.7                 | 90.6        | 98.0 | 23.8                 | 34.6    | 93.6     | 20.9 | 78.6 |
|            |        | DiAD <a href="#">He et al. (2024b)</a>           | 94.0 | 94.4                 | 88.1        | 87.2 | 4.0                  | 10.7    | 41.8     | 5.7  | 60.0 |
|            |        | ViTAD <a href="#">Zhang et al. (2023a)</a>       | 91.2 | 91.1                 | 86.1        | 98.3 | 22.6                 | 28.7    | 88.0     | 16.8 | 74.4 |
|            |        | InvAD <a href="#">Zhang et al. (2024a)</a>       | 97.7 | 97.9                 | 93.3        | 99.2 | 15.8                 | 28.0    | 93.2     | 16.2 | 77.7 |
|            |        | InvAD-lite <a href="#">Zhang et al. (2024a)</a>  | 96.4 | 96.5                 | 90.6        | 99.2 | 17.8                 | 28.0    | 93.6     | 16.3 | 77.1 |
|            |        | MambaAD <a href="#">He et al. (2024a)</a>        | 95.2 | 95.5                 | 88.7        | 99.1 | 18.9                 | 27.4    | 92.5     | 15.8 | 76.3 |
|            | Hybrid | UniAD <a href="#">You et al. (2022)</a>          | 89.8 | 90.6                 | 83.3        | 98.5 | 13.4                 | 23.9    | 86.1     | 13.5 | 71.7 |
|            |        | RD++ <a href="#">Tien et al. (2023)</a>          | 95.7 | 95.6                 | 90.8        | 98.0 | 30.9                 | 34.1    | 93.3     | 20.5 | 79.1 |
|            |        | DesTSeg <a href="#">Zhang et al. (2023c)</a>     | 95.8 | 96.3                 | 89.8        | 90.6 | 27.5                 | 31.6    | 61.2     | 18.7 | 73.3 |
| pcb4       | Aug.   | DRAEM <a href="#">Zavrtanik et al. (2021)</a>    | 73.1 | 66.8                 | 77.3        | 36.1 | 0.4                  | 1.3     | 6.1      | 0.7  | 41.7 |
|            |        | SimpleNet <a href="#">Liu et al. (2023)</a>      | 95.4 | 95.1                 | 91.1        | 92.2 | 13.9                 | 23.4    | 67.1     | 13.2 | 71.5 |
|            |        | RealNet <a href="#">Zhang et al. (2024c)</a>     | 92.1 | 92.1                 | 84.4        | 68.6 | 37.2                 | 38.7    | 31.4     | 24.0 | 66.8 |
|            | Emb.   | CFA <a href="#">Lee et al. (2022)</a>            | 89.5 | 87.4                 | 83.7        | 91.4 | 7.6                  | 14.1    | 70.0     | 7.6  | 66.3 |
|            |        | CFLOW-AD <a href="#">Gudovskiy et al. (2022)</a> | 98.9 | 98.8                 | 95.7        | 96.8 | 22.2                 | 29.7    | 85.6     | 17.4 | 78.2 |
|            |        | PyramidalFlow <a href="#">Lei et al. (2023)</a>  | 62.6 | 64.8                 | 69.5        | 92.7 | 6.9                  | 12.4    | 78.4     | 6.6  | 56.6 |
|            | Rec.   | RD <a href="#">Deng &amp; Li (2022)</a>          | 99.9 | 99.9                 | 98.5        | 97.7 | 30.0                 | 35.4    | 88.4     | 21.5 | 81.2 |
|            |        | DiAD <a href="#">He et al. (2024b)</a>           | 99.8 | 99.7                 | 99.0        | 95.4 | 9.9                  | 18.4    | 82.4     | 10.1 | 72.1 |
|            |        | ViTAD <a href="#">Zhang et al. (2023a)</a>       | 98.9 | 98.5                 | 97.0        | 99.0 | 42.2                 | 47.7    | 93.5     | 31.3 | 84.4 |
|            |        | InvAD <a href="#">Zhang et al. (2024a)</a>       | 99.9 | 99.9                 | 98.5        | 98.5 | 44.1                 | 43.4    | 90.6     | 27.7 | 84.3 |
|            |        | InvAD-lite <a href="#">Zhang et al. (2024a)</a>  | 99.7 | 99.7                 | 97.5        | 98.8 | 49.7                 | 48.7    | 92.0     | 32.2 | 85.6 |
|            |        | MambaAD <a href="#">He et al. (2024a)</a>        | 99.7 | 99.7                 | 96.4        | 98.6 | 44.0                 | 44.9    | 90.6     | 28.9 | 84.1 |
|            | Hybrid | UniAD <a href="#">You et al. (2022)</a>          | 99.4 | 99.4                 | 96.2        | 97.6 | 34.3                 | 39.0    | 85.2     | 24.2 | 81.2 |
|            |        | RD++ <a href="#">Tien et al. (2023)</a>          | 99.9 | 99.9                 | 99.0        | 97.1 | 27.4                 | 35.9    | 85.8     | 21.9 | 80.6 |
|            |        | DesTSeg <a href="#">Zhang et al. (2023c)</a>     | 98.0 | 98.0                 | 93.0        | 94.4 | 53.8                 | 52.1    | 74.9     | 35.3 | 82.6 |
| pipe.fryum | Aug.   | DRAEM <a href="#">Zavrtanik et al. (2021)</a>    | 63.2 | 76.9                 | 80.8        | 46.0 | 1.3                  | 3.1     | 14.3     | 1.6  | 44.9 |
|            |        | SimpleNet <a href="#">Liu et al. (2023)</a>      | 83.7 | 92.1                 | 84.2        | 97.9 | 64.1                 | 61.6    | 76.6     | 44.5 | 80.9 |
|            |        | RealNet <a href="#">Zhang et al. (2024c)</a>     | 79.1 | 91.2                 | 80.3        | 64.1 | 48.5                 | 37.7    | 39.6     | 23.2 | 65.5 |
|            | Emb.   | CFA <a href="#">Lee et al. (2022)</a>            | 63.7 | 81.4                 | 80.0        | 96.8 | 61.0                 | 59.4    | 77.8     | 42.3 | 74.4 |
|            |        | CFLOW-AD <a href="#">Gudovskiy et al. (2022)</a> | 97.6 | 98.8                 | 95.0        | 99.2 | 61.6                 | 61.4    | 94.9     | 44.3 | 88.2 |
|            |        | PyramidalFlow <a href="#">Lei et al. (2023)</a>  | 59.7 | 76.7                 | 80.0        | 89.8 | 15.7                 | 21.5    | 64.2     | 12.1 | 60.0 |
|            | Rec.   | RD <a href="#">Deng &amp; Li (2022)</a>          | 98.2 | 99.1                 | 96.6        | 99.1 | 55.1                 | 58.1    | 95.9     | 41.0 | 87.5 |
|            |        | DiAD <a href="#">He et al. (2024b)</a>           | 97.7 | 98.7                 | 98.0        | 98.6 | 55.1                 | 58.1    | 77.9     | 41.0 | 83.5 |
|            |        | ViTAD <a href="#">Zhang et al. (2023a)</a>       | 97.6 | 98.9                 | 94.6        | 99.5 | 65.1                 | 66.3    | 94.9     | 49.6 | 89.2 |
|            |        | InvAD <a href="#">Zhang et al. (2024a)</a>       | 99.5 | 99.7                 | 98.0        | 99.5 | 69.7                 | 67.1    | 95.1     | 50.5 | 91.0 |
|            |        | InvAD-lite <a href="#">Zhang et al. (2024a)</a>  | 98.3 | 99.2                 | 95.6        | 99.2 | 61.5                 | 60.5    | 95.1     | 43.4 | 88.4 |
|            |        | MambaAD <a href="#">He et al. (2024a)</a>        | 98.8 | 99.3                 | 97.6        | 98.8 | 52.4                 | 53.0    | 94.2     | 36.0 | 86.6 |
|            | Hybrid | UniAD <a href="#">You et al. (2022)</a>          | 97.0 | 98.5                 | 95.1        | 98.9 | 50.1                 | 55.0    | 93.9     | 37.9 | 85.7 |
|            |        | RD++ <a href="#">Tien et al. (2023)</a>          | 94.1 | 96.9                 | 91.9        | 98.9 | 54.9                 | 57.0    | 94.2     | 39.9 | 85.3 |
|            |        | DesTSeg <a href="#">Zhang et al. (2023c)</a>     | 95.0 | 97.5                 | 93.1        | 86.8 | 74.3                 | 69.7    | 55.9     | 53.5 | 83.4 |

Table A68: Benchmarked results on VisA dataset Zou et al. (2022) by the suggested metrics in Sec. 3.3.

|     | Method | Image-level                                      |      |                      | Pixel-level |      |                      | mAU-PRO | mIoU-max | mAD  |      |
|-----|--------|--------------------------------------------------|------|----------------------|-------------|------|----------------------|---------|----------|------|------|
|     |        | mAU-ROC                                          | mAP  | mF <sub>1</sub> -max | mAU-ROC     | mAP  | mF <sub>1</sub> -max |         |          |      |      |
| Avg | Aug.   | DRAEM <a href="#">Zavrtanik et al. (2021)</a>    | 56.2 | 64.6                 | 74.9        | 45.0 | 0.7                  | 1.8     | 16.0     | 0.9  | 40.6 |
|     |        | SimpleNet <a href="#">Liu et al. (2023)</a>      | 80.7 | 83.8                 | 79.3        | 94.4 | 29.2                 | 33.1    | 74.2     | 22.1 | 69.5 |
|     |        | RealNet <a href="#">Zhang et al. (2024c)</a>     | 79.2 | 84.8                 | 78.3        | 65.4 | 29.2                 | 27.9    | 33.9     | 17.4 | 59.9 |
|     | Emb.   | CFA <a href="#">Lee et al. (2022)</a>            | 67.1 | 73.8                 | 75.3        | 83.0 | 13.7                 | 18.7    | 48.7     | 11.3 | 56.5 |
|     |        | CFLOW-AD <a href="#">Gudovskiy et al. (2022)</a> | 87.2 | 89.5                 | 85.1        | 97.8 | 34.2                 | 37.2    | 87.3     | 24.9 | 75.7 |
|     |        | PyramidalFlow <a href="#">Lei et al. (2023)</a>  | 69.0 | 72.9                 | 75.8        | 79.1 | 7.9                  | 8.7     | 52.6     | 4.7  | 54.8 |
|     | Rec.   | RD <a href="#">Deng &amp; Li (2022)</a>          | 93.9 | 94.8                 | 90.4        | 98.1 | 38.4                 | 43.7    | 91.9     | 29.0 | 80.5 |
|     |        | DiAD <a href="#">He et al. (2024b)</a>           | 90.5 | 91.4                 | 90.4        | 83.4 | 19.2                 | 25.0    | 44.3     | 16.2 | 63.5 |
|     |        | ViTAD <a href="#">Zhang et al. (2023a)</a>       | 90.3 | 91.2                 | 86.4        | 98.2 | 36.4                 | 40.9    | 85.8     | 27.5 | 77.3 |
|     |        | InvAD <a href="#">Zhang et al. (2024a)</a>       | 95.6 | 96.0                 | 92.3        | 99.0 | 43.7                 | 46.9    | 93.0     | 32.6 | 82.6 |
|     |        | InvAD-lite <a href="#">Zhang et al. (2024a)</a>  | 95.3 | 95.8                 | 91.0        | 98.7 | 41.2                 | 44.9    | 93.2     | 30.6 | 81.8 |
|     |        | MambaAD <a href="#">He et al. (2024a)</a>        | 93.6 | 93.9                 | 89.8        | 98.2 | 34.0                 | 39.3    | 90.5     | 25.9 | 79.0 |
|     | Hybrid | UniAD <a href="#">You et al. (2022)</a>          | 91.4 | 93.3                 | 87.5        | 98.5 | 35.3                 | 40.2    | 89.0     | 26.5 | 78.2 |
|     |        | RD++ <a href="#">Tien et al. (2023)</a>          | 93.1 | 94.1                 | 90.0        | 98.4 | 40.4                 | 44.8    | 91.4     | 29.9 | 80.6 |
|     |        | DesTSeg <a href="#">Zhang et al. (2023c)</a>     | 89.0 | 90.3                 | 85.9        | 84.8 | 43.3                 | 44.4    | 57.5     | 30.1 | 73.0 |

## R DETAILED QUANTITATIVE RESULTS ON BTAD DATASET UNDER 300 EPOCHS

Table A69: Benchmarked results on BTAD dataset [Mishra et al. \(2021\)](#) by the suggested metrics in [Sec. 3.3](#).

|     | Method                                    | Image-level                                      |      |                      | Pixel-level |      |                      | mAU-PRO | mIoU-max | mAD  |      |
|-----|-------------------------------------------|--------------------------------------------------|------|----------------------|-------------|------|----------------------|---------|----------|------|------|
|     |                                           | mAU-ROC                                          | mAP  | mF <sub>1</sub> -max | mAU-ROC     | mAP  | mF <sub>1</sub> -max |         |          |      |      |
| 01  | Aug.                                      | DRAEM <a href="#">Zavrtanik et al. (2021)</a>    | 75.0 | 88.7                 | 86.7        | 44.8 | 2.8                  | 6.3     | 13.0     | 3.3  | 50.1 |
|     |                                           | SimpleNet <a href="#">Liu et al. (2023)</a>      | 99.2 | 99.7                 | 98.0        | 94.6 | 38.0                 | 42.6    | 64.2     | 27.1 | 79.4 |
|     |                                           | RealNet <a href="#">Zhang et al. (2024c)</a>     | 100. | 100.                 | 100.        | 94.2 | 63.8                 | 63.6    | 84.3     | 46.6 | 88.2 |
|     | Emb.                                      | CFA <a href="#">Lee et al. (2022)</a>            | 98.2 | 99.4                 | 99.0        | 94.6 | 37.3                 | 43.0    | 64.5     | 27.4 | 79.4 |
|     |                                           | PatchCore <a href="#">Roth et al. (2022)</a>     | 99.6 | 99.8                 | 99.0        | 97.1 | 55.5                 | 56.6    | 75.8     | 39.5 | 85.4 |
|     |                                           | CFLOW-AD <a href="#">Gudovskiy et al. (2022)</a> | 95.5 | 98.4                 | 93.6        | 94.8 | 36.2                 | 45.6    | 66.4     | 29.5 | 78.3 |
|     | Rec.                                      | PyramidalFlow <a href="#">Lei et al. (2023)</a>  | 90.3 | 94.1                 | 94.2        | 51.8 | 14.7                 | 6.3     | 17.1     | 3.3  | 57.7 |
|     |                                           | RD <a href="#">Deng &amp; Li (2022)</a>          | 99.9 | 100.                 | 99.0        | 97.6 | 55.3                 | 57.2    | 82.6     | 40.1 | 86.4 |
|     |                                           | DiAD <a href="#">He et al. (2024b)</a>           | 99.5 | 99.8                 | 99.0        | 90.1 | 24.3                 | 30.8    | 72.6     | 18.2 | 73.7 |
|     | Hybrid                                    | ViTAD <a href="#">Zhang et al. (2023a)</a>       | 98.3 | 99.3                 | 96.9        | 96.5 | 55.0                 | 55.2    | 69.2     | 38.2 | 83.6 |
|     |                                           | InvAD <a href="#">Zhang et al. (2024a)</a>       | 99.9 | 100.                 | 99.0        | 97.5 | 57.4                 | 58.8    | 80.7     | 41.7 | 86.6 |
|     |                                           | InvAD-lite <a href="#">Zhang et al. (2024a)</a>  | 98.2 | 99.4                 | 96.9        | 97.1 | 56.7                 | 59.5    | 75.4     | 42.3 | 85.2 |
| 02  | Aug.                                      | MambaAD <a href="#">He et al. (2024a)</a>        | 97.7 | 99.2                 | 96.0        | 97.1 | 55.3                 | 59.0    | 75.9     | 41.8 | 84.7 |
|     |                                           | UniAD <a href="#">You et al. (2022)</a>          | 99.8 | 99.9                 | 99.0        | 97.4 | 55.7                 | 57.7    | 80.1     | 40.6 | 86.1 |
|     |                                           | RD++ <a href="#">Tien et al. (2023)</a>          | 99.4 | 99.8                 | 97.9        | 97.5 | 53.5                 | 56.9    | 80.6     | 39.8 | 85.6 |
|     | Emb.                                      | DesTSeg <a href="#">Zhang et al. (2023c)</a>     | 98.3 | 99.4                 | 96.0        | 91.9 | 29.9                 | 43.9    | 69.9     | 28.1 | 78.4 |
|     |                                           | DRAEM <a href="#">Zavrtanik et al. (2021)</a>    | 63.6 | 92.6                 | 92.8        | 47.9 | 6.6                  | 10.4    | 16.2     | 5.5  | 51.6 |
|     |                                           | SimpleNet <a href="#">Liu et al. (2023)</a>      | 83.2 | 97.1                 | 93.2        | 94.6 | 49.2                 | 50.3    | 47.2     | 33.6 | 75.7 |
|     | Rec.                                      | RealNet <a href="#">Zhang et al. (2024c)</a>     | 80.0 | 96.7                 | 93.0        | 90.4 | 31.8                 | 51.8    | 44.0     | 35.0 | 72.2 |
|     |                                           | CFA <a href="#">Lee et al. (2022)</a>            | 80.3 | 96.5                 | 93.2        | 94.4 | 47.5                 | 51.2    | 47.6     | 34.5 | 75.1 |
|     |                                           | PatchCore <a href="#">Roth et al. (2022)</a>     | 83.8 | 97.3                 | 92.8        | 96.0 | 59.3                 | 59.8    | 54.1     | 42.7 | 79.3 |
|     | Hybrid                                    | CFLOW-AD <a href="#">Gudovskiy et al. (2022)</a> | 79.9 | 96.7                 | 92.8        | 96.3 | 59.3                 | 62.8    | 54.3     | 45.7 | 79.0 |
|     |                                           | PyramidalFlow <a href="#">Lei et al. (2023)</a>  | 73.7 | 95.2                 | 92.8        | 81.9 | 63.2                 | 52.9    | 32.5     | 35.9 | 72.4 |
|     |                                           | RD <a href="#">Deng &amp; Li (2022)</a>          | 82.9 | 97.2                 | 92.8        | 96.7 | 63.3                 | 64.2    | 58.3     | 47.2 | 80.8 |
| 03  | Aug.                                      | DiAD <a href="#">He et al. (2024b)</a>           | 72.9 | 95.2                 | 92.8        | 87.8 | 29.4                 | 37.1    | 45.1     | 22.8 | 65.8 |
|     |                                           | ViTAD <a href="#">Zhang et al. (2023a)</a>       | 84.0 | 97.3                 | 93.2        | 96.7 | 72.9                 | 67.2    | 51.2     | 50.6 | 81.8 |
|     |                                           | InvAD <a href="#">Zhang et al. (2024a)</a>       | 86.4 | 97.7                 | 93.8        | 96.4 | 60.2                 | 61.1    | 57.1     | 44.0 | 80.7 |
|     | Emb.                                      | InvAD-lite <a href="#">Zhang et al. (2024a)</a>  | 84.6 | 97.5                 | 92.8        | 96.4 | 59.8                 | 60.7    | 58.5     | 43.5 | 80.2 |
|     |                                           | MambaAD <a href="#">He et al. (2024a)</a>        | 81.6 | 97.0                 | 92.8        | 96.1 | 54.2                 | 59.2    | 57.6     | 42.0 | 78.6 |
|     |                                           | UniAD <a href="#">You et al. (2022)</a>          | 84.0 | 97.3                 | 92.8        | 95.1 | 43.5                 | 53.6    | 57.9     | 36.6 | 76.9 |
|     | Rec.                                      | RD++ <a href="#">Tien et al. (2023)</a>          | 84.3 | 97.4                 | 93.2        | 96.6 | 64.1                 | 63.4    | 57.3     | 46.4 | 81.0 |
|     |                                           | DesTSeg <a href="#">Zhang et al. (2023c)</a>     | 82.7 | 97.0                 | 92.8        | 93.6 | 58.6                 | 51.0    | 52.7     | 34.2 | 77.4 |
|     |                                           | DRAEM <a href="#">Zavrtanik et al. (2021)</a>    | 69.2 | 49.0                 | 59.1        | 50.4 | 0.3                  | 1.7     | 19.2     | 0.9  | 38.5 |
|     | Hybrid                                    | SimpleNet <a href="#">Liu et al. (2023)</a>      | 99.7 | 96.9                 | 90.6        | 99.4 | 35.6                 | 38.1    | 97.2     | 23.5 | 81.7 |
|     |                                           | RealNet <a href="#">Zhang et al. (2024c)</a>     | 99.3 | 92.2                 | 84.5        | 76.9 | 48.6                 | 51.1    | 45.3     | 34.4 | 73.7 |
|     |                                           | CFA <a href="#">Lee et al. (2022)</a>            | 99.8 | 97.5                 | 91.5        | 99.5 | 55.4                 | 54.9    | 95.0     | 37.8 | 86.2 |
| Avg | Aug.                                      | PatchCore <a href="#">Roth et al. (2022)</a>     | 99.8 | 97.3                 | 92.1        | 99.5 | 50.1                 | 48.2    | 98.0     | 31.8 | 85.2 |
|     |                                           | CFLOW-AD <a href="#">Gudovskiy et al. (2022)</a> | 99.3 | 91.8                 | 82.7        | 99.4 | 42.5                 | 38.5    | 97.5     | 23.9 | 80.4 |
|     |                                           | PyramidalFlow <a href="#">Lei et al. (2023)</a>  | 92.0 | 55.9                 | 50.0        | 94.8 | 5.2                  | 11.2    | 79.7     | 5.9  | 56.8 |
|     | Emb.                                      | RD <a href="#">Deng &amp; Li (2022)</a>          | 99.6 | 93.3                 | 89.6        | 99.7 | 52.7                 | 52.6    | 98.9     | 35.7 | 85.1 |
|     |                                           | DiAD <a href="#">He et al. (2024b)</a>           | 98.3 | 69.9                 | 86.1        | 97.9 | 7.7                  | 13.1    | 93.3     | 7.0  | 66.6 |
|     |                                           | ViTAD <a href="#">Zhang et al. (2023a)</a>       | 99.6 | 94.3                 | 90.9        | 99.6 | 47.0                 | 47.1    | 98.1     | 30.8 | 83.9 |
|     | Rec.                                      | InvAD <a href="#">Zhang et al. (2024a)</a>       | 99.6 | 94.1                 | 88.2        | 99.7 | 58.6                 | 56.4    | 98.7     | 39.3 | 86.2 |
|     |                                           | InvAD-lite <a href="#">Zhang et al. (2024a)</a>  | 99.8 | 96.8                 | 93.5        | 99.6 | 50.7                 | 51.0    | 98.2     | 34.2 | 85.8 |
|     |                                           | MambaAD <a href="#">He et al. (2024a)</a>        | 99.5 | 92.3                 | 90.3        | 99.6 | 44.2                 | 47.1    | 98.3     | 30.8 | 83.2 |
|     | Hybrid                                    | UniAD <a href="#">You et al. (2022)</a>          | 99.8 | 97.8                 | 93.1        | 99.7 | 57.8                 | 55.1    | 98.7     | 38.0 | 87.4 |
|     |                                           | RD++ <a href="#">Tien et al. (2023)</a>          | 99.7 | 95.6                 | 91.8        | 99.8 | 55.4                 | 54.3    | 98.8     | 37.3 | 86.4 |
|     |                                           | DesTSeg <a href="#">Zhang et al. (2023c)</a>     | 99.6 | 93.9                 | 92.5        | 98.9 | 28.8                 | 20.6    | 96.1     | 11.5 | 78.2 |
| Avg | Aug.                                      | DRAEM <a href="#">Zavrtanik et al. (2021)</a>    | 69.3 | 76.8                 | 79.5        | 47.7 | 3.2                  | 6.1     | 16.1     | 3.2  | 46.7 |
|     |                                           | SimpleNet <a href="#">Liu et al. (2023)</a>      | 94.0 | 97.9                 | 93.9        | 96.2 | 41.0                 | 43.7    | 69.6     | 28.1 | 78.9 |
|     |                                           | RealNet <a href="#">Zhang et al. (2024c)</a>     | 93.1 | 96.3                 | 92.5        | 87.2 | 48.0                 | 55.5    | 57.9     | 38.7 | 78.1 |
|     | Emb.                                      | CFA <a href="#">Lee et al. (2022)</a>            | 92.7 | 97.8                 | 94.6        | 96.2 | 46.7                 | 49.7    | 69.0     | 33.2 | 80.2 |
|     |                                           | PatchCore <a href="#">Roth et al. (2022)</a>     | 94.4 | 98.2                 | 94.6        | 97.5 | 55.0                 | 54.9    | 76.0     | 38.0 | 83.3 |
|     |                                           | CFLOW-AD <a href="#">Gudovskiy et al. (2022)</a> | 91.6 | 95.6                 | 89.7        | 96.9 | 46.0                 | 49.0    | 72.7     | 33.0 | 79.2 |
|     | Rec.                                      | PyramidalFlow <a href="#">Lei et al. (2023)</a>  | 85.3 | 81.7                 | 79.0        | 76.1 | 27.7                 | 23.4    | 43.1     | 15.0 | 62.3 |
|     |                                           | RD <a href="#">Deng &amp; Li (2022)</a>          | 94.1 | 96.8                 | 93.8        | 98.0 | 57.1                 | 58.0    | 79.9     | 41.0 | 84.1 |
|     |                                           | DiAD <a href="#">He et al. (2024b)</a>           | 90.2 | 88.3                 | 92.6        | 91.9 | 20.5                 | 27.0    | 70.3     | 16.0 | 68.7 |
|     | Hybrid                                    | ViTAD <a href="#">Zhang et al. (2023a)</a>       | 94.0 | 97.0                 | 93.7        | 97.6 | 58.3                 | 56.5    | 72.8     | 39.9 | 83.1 |
|     |                                           | InvAD <a href="#">Zhang et al. (2024a)</a>       | 95.3 | 97.3                 | 93.7        | 97.9 | 58.7                 | 58.8    | 78.8     | 41.7 | 84.5 |
|     |                                           | InvAD-lite <a href="#">Zhang et al. (2024a)</a>  | 94.2 | 97.9                 | 94.4        | 97.7 | 55.7                 | 57.0    | 77.4     | 40.0 | 83.7 |
| Avg | MambaAD <a href="#">He et al. (2024a)</a> | 92.9                                             | 96.2 | 93.0                 | 97.6        | 51.2 | 55.1                 | 77.3    | 38.2     | 82.2 |      |
|     | UniAD <a href="#">You et al. (2022)</a>   | 94.5                                             | 98.4 | 94.9                 | 97.4        | 52.4 | 55.5                 | 78.9    | 38.4     | 83.5 |      |
|     | RD++ <a href="#">Tien et al. (2023)</a>   | 94.5                                             | 97.6 | 94.3                 | 98.0        | 57.7 | 58.2                 | 78.9    | 41.2     | 84.3 |      |
| Avg | Aug.                                      | DesTSeg <a href="#">Zhang et al. (2023c)</a>     | 93.5 | 96.7                 | 93.8        | 94.8 | 39.1                 | 38.5    | 72.9     | 24.6 | 78.0 |

## S DETAILED QUANTITATIVE RESULTS ON MPDD DATASET UNDER 300 EPOCHS

Table A70: Benchmarked results on MPDD dataset [Jezek et al. \(2021\)](#) by the suggested metrics in [Sec. 3.3](#).

|               | Method                                             | Image-level |             |                      | Pixel-level |             |                      | mAU-PRO     | mIoU-max    | mAD         |
|---------------|----------------------------------------------------|-------------|-------------|----------------------|-------------|-------------|----------------------|-------------|-------------|-------------|
|               |                                                    | mAU-ROC     | mAP         | mF <sub>1</sub> -max | mAU-ROC     | mAP         | mF <sub>1</sub> -max |             |             |             |
| bracket.black | Aug. DRAEM <a href="#">Zavrtanik et al. (2021)</a> | 45.3        | 54.3        | 77.0                 | 52.8        | 0.2         | 0.5                  | 24.9        | 0.3         | 39.2        |
|               | SimpleNet <a href="#">Liu et al. (2023)</a>        | 78.7        | 85.3        | 80.4                 | 94.9        | 3.6         | 9.1                  | 89.3        | 4.7         | 65.3        |
|               | RealNet <a href="#">Zhang et al. (2024c)</a>       | 72.0        | 84.5        | 76.4                 | 64.4        | 9.5         | 16.7                 | 45.9        | 9.1         | 55.9        |
|               | Emb. CFA <a href="#">Lee et al. (2022)</a>         | 87.9        | 92.7        | 84.1                 | 93.8        | 2.9         | 8.8                  | 83.8        | 4.6         | 67.8        |
|               | PatchCore <a href="#">Roth et al. (2022)</a>       | 88.4        | 92.7        | 83.9                 | <b>98.5</b> | <b>11.0</b> | <b>21.0</b>          | <b>96.7</b> | <b>11.8</b> | <b>72.6</b> |
|               | CFLOW-AD <a href="#">Gudovskiy et al. (2022)</a>   | 64.8        | 74.6        | 76.7                 | 95.8        | 2.5         | 5.4                  | 86.5        | 2.8         | 59.8        |
|               | PyramidalFlow <a href="#">Lei et al. (2023)</a>    | 75.3        | 81.8        | 79.3                 | 89.5        | 0.4         | 1.0                  | 66.2        | 0.5         | 59.0        |
|               | Rec. RD <a href="#">Deng &amp; Li (2022)</a>       | 83.7        | 87.0        | 85.7                 | 97.6        | 5.9         | 12.3                 | 93.3        | 6.5         | 68.9        |
|               | DiAD <a href="#">He et al. (2024b)</a>             | <b>100.</b> | <b>100.</b> | <b>100.</b>          | 90.8        | 0.5         | 1.4                  | 63.8        | 0.7         | 65.2        |
|               | VITAD <a href="#">Zhang et al. (2023a)</a>         | 78.7        | 86.1        | 81.5                 | 96.0        | 2.7         | 7.8                  | 89.8        | 4.1         | 65.6        |
|               | InvAD <a href="#">Zhang et al. (2024a)</a>         | 88.2        | 93.2        | 83.8                 | 98.1        | 8.2         | 15.0                 | 95.5        | 8.1         | 71.3        |
|               | InvAD-lite <a href="#">Zhang et al. (2024a)</a>    | 81.2        | 87.5        | 81.7                 | 95.8        | 7.4         | 16.2                 | 90.6        | 8.8         | 68.0        |
|               | MambaAD <a href="#">He et al. (2024a)</a>          | 82.8        | 88.6        | 80.7                 | 94.8        | 4.6         | 13.1                 | 89.1        | 7.0         | 67.2        |
|               | Hybrid UniAD <a href="#">You et al. (2022)</a>     | 96.3        | 96.6        | 96.9                 | 94.8        | 0.9         | 2.2                  | 84.5        | 1.1         | 71.1        |
|               | RD++ <a href="#">Tien et al. (2023)</a>            | 82.3        | 86.2        | 81.7                 | 97.6        | 4.4         | 9.6                  | 93.8        | 5.0         | 67.4        |
|               | DesTSeg <a href="#">Zhang et al. (2023c)</a>       | 92.9        | 95.0        | 91.3                 | 91.9        | 6.0         | 14.2                 | 87.6        | 7.6         | 71.5        |
| bracket.brown | Aug. DRAEM <a href="#">Zavrtanik et al. (2021)</a> | 53.9        | 69.1        | 80.3                 | 54.4        | 0.7         | 1.3                  | 28.8        | 0.6         | 44.5        |
|               | SimpleNet <a href="#">Liu et al. (2023)</a>        | 92.4        | 95.3        | 93.5                 | 94.9        | 8.8         | 17.0                 | 87.4        | 9.3         | 72.9        |
|               | RealNet <a href="#">Zhang et al. (2024c)</a>       | 87.4        | 90.4        | 92.6                 | 51.4        | 10.1        | 3.5                  | 17.8        | 1.8         | 55.4        |
|               | Emb. CFA <a href="#">Lee et al. (2022)</a>         | 93.5        | 95.8        | 96.2                 | 91.5        | 7.4         | 17.7                 | 69.6        | 9.7         | 70.9        |
|               | PatchCore <a href="#">Roth et al. (2022)</a>       | 95.6        | 97.2        | 95.3                 | <b>98.6</b> | 26.2        | 32.0                 | <b>95.4</b> | 19.0        | 79.5        |
|               | CFLOW-AD <a href="#">Gudovskiy et al. (2022)</a>   | 77.8        | 81.6        | 87.7                 | 96.4        | 7.2         | 14.0                 | 92.5        | 7.5         | 67.4        |
|               | PyramidalFlow <a href="#">Lei et al. (2023)</a>    | 70.0        | 78.6        | 84.4                 | 93.9        | 5.5         | 12.6                 | 75.4        | 6.8         | 62.3        |
|               | Rec. RD <a href="#">Deng &amp; Li (2022)</a>       | 83.1        | 87.0        | 91.7                 | 96.0        | 14.2        | 23.2                 | 94.0        | 13.1        | 72.1        |
|               | DiAD <a href="#">He et al. (2024b)</a>             | 88.6        | 94.2        | 89.5                 | 94.8        | 22.5        | 29.9                 | 69.8        | 17.6        | 69.9        |
|               | VITAD <a href="#">Zhang et al. (2023a)</a>         | 86.0        | 87.8        | 91.9                 | 98.3        | 16.2        | 26.2                 | 95.0        | 15.1        | 73.7        |
|               | InvAD <a href="#">Zhang et al. (2024a)</a>         | 96.8        | 98.0        | <b>98.1</b>          | 96.3        | 18.7        | 29.4                 | 91.4        | 17.2        | 78.3        |
|               | InvAD-lite <a href="#">Zhang et al. (2024a)</a>    | 93.4        | 96.2        | 92.7                 | 98.5        | 21.4        | 31.6                 | 95.1        | 18.8        | 77.9        |
|               | MambaAD <a href="#">He et al. (2024a)</a>          | <b>97.2</b> | <b>98.5</b> | 97.1                 | 97.8        | 19.6        | 27.3                 | 92.8        | 15.8        | 78.5        |
|               | Hybrid UniAD <a href="#">You et al. (2022)</a>     | 93.1        | 95.8        | 93.5                 | <b>98.6</b> | <b>39.3</b> | <b>47.0</b>          | 90.7        | <b>30.8</b> | <b>81.5</b> |
|               | RD++ <a href="#">Tien et al. (2023)</a>            | 85.7        | 90.5        | 92.7                 | 96.8        | 19.8        | 27.7                 | 95.1        | 16.1        | 74.7        |
|               | DesTSeg <a href="#">Zhang et al. (2023c)</a>       | 91.4        | 92.4        | 96.2                 | 78.9        | 5.1         | 8.8                  | 66.9        | 4.6         | 66.6        |
| bracket.white | Aug. DRAEM <a href="#">Zavrtanik et al. (2021)</a> | 69.4        | 70.9        | 74.0                 | 66.1        | 0.1         | 0.2                  | 23.6        | 0.1         | 47.0        |
|               | SimpleNet <a href="#">Liu et al. (2023)</a>        | 88.4        | 91.4        | 83.0                 | 97.8        | 2.2         | 5.6                  | 86.4        | 2.9         | 67.8        |
|               | RealNet <a href="#">Zhang et al. (2024c)</a>       | 72.0        | 82.3        | 78.4                 | 81.4        | <b>30.1</b> | <b>39.6</b>          | 40.1        | <b>24.7</b> | 62.7        |
|               | Emb. CFA <a href="#">Lee et al. (2022)</a>         | 89.2        | 91.7        | 81.5                 | 94.9        | 0.8         | 2.9                  | 72.4        | 1.4         | 65.1        |
|               | PatchCore <a href="#">Roth et al. (2022)</a>       | 93.3        | 94.8        | 88.9                 | 98.8        | 10.0        | 19.3                 | 93.9        | 10.7        | 73.9        |
|               | CFLOW-AD <a href="#">Gudovskiy et al. (2022)</a>   | 75.3        | 76.4        | 73.0                 | 98.6        | 2.1         | 4.6                  | 93.8        | 2.4         | 62.3        |
|               | PyramidalFlow <a href="#">Lei et al. (2023)</a>    | 76.3        | 78.5        | 76.9                 | 99.0        | 6.3         | 14.2                 | 90.1        | 7.7         | 64.8        |
|               | Rec. RD <a href="#">Deng &amp; Li (2022)</a>       | 85.0        | 86.9        | 80.6                 | 98.9        | 1.7         | 5.0                  | 94.4        | 2.5         | 67.1        |
|               | DiAD <a href="#">He et al. (2024b)</a>             | 81.0        | 82.5        | 75.4                 | 94.2        | 0.2         | 0.6                  | 80.0        | 0.3         | 59.1        |
|               | VITAD <a href="#">Zhang et al. (2023a)</a>         | 79.4        | 85.4        | 77.2                 | 95.4        | 0.8         | 2.6                  | 86.6        | 1.3         | 63.5        |
|               | InvAD <a href="#">Zhang et al. (2024a)</a>         | 95.8        | <b>96.9</b> | 93.1                 | <b>99.3</b> | 10.7        | 20.9                 | 94.7        | 11.7        | <b>75.8</b> |
|               | InvAD-lite <a href="#">Zhang et al. (2024a)</a>    | 93.6        | 95.1        | 87.3                 | <b>99.3</b> | 6.8         | 10.7                 | 94.9        | 5.6         | 72.5        |
|               | MambaAD <a href="#">He et al. (2024a)</a>          | 93.6        | 95.1        | 89.7                 | <b>99.3</b> | 8.9         | 18.9                 | <b>95.0</b> | 10.5        | 74.2        |
|               | Hybrid UniAD <a href="#">You et al. (2022)</a>     | 82.4        | 80.5        | 79.3                 | 95.9        | 0.8         | 2.8                  | 82.0        | 1.4         | 63.1        |
|               | RD++ <a href="#">Tien et al. (2023)</a>            | 83.4        | 86.4        | 76.2                 | 98.7        | 1.6         | 4.3                  | 93.4        | 2.2         | 65.8        |
|               | DesTSeg <a href="#">Zhang et al. (2023c)</a>       | <b>96.3</b> | 93.5        | <b>94.9</b>          | 91.6        | 0.9         | 2.2                  | 52.6        | 1.1         | 65.9        |
| connector     | Aug. DRAEM <a href="#">Zavrtanik et al. (2021)</a> | 63.3        | 47.7        | 53.1                 | 30.3        | 0.5         | 1.5                  | 12.2        | 0.8         | 32.9        |
|               | SimpleNet <a href="#">Liu et al. (2023)</a>        | 99.3        | 98.5        | 96.6                 | 98.9        | 56.0        | 55.2                 | 96.5        | 38.2        | 87.4        |
|               | RealNet <a href="#">Zhang et al. (2024c)</a>       | 93.3        | 86.8        | 85.7                 | 70.7        | 47.9        | 42.9                 | 48.0        | 27.3        | 70.5        |
|               | Emb. CFA <a href="#">Lee et al. (2022)</a>         | 95.7        | 86.4        | 93.3                 | 97.1        | 31.9        | 39.9                 | 90.8        | 25.0        | 78.4        |
|               | PatchCore <a href="#">Roth et al. (2022)</a>       | <b>100.</b> | <b>100.</b> | <b>100.</b>          | <b>99.5</b> | <b>71.2</b> | <b>63.3</b>          | <b>98.4</b> | <b>46.3</b> | <b>91.5</b> |
|               | CFLOW-AD <a href="#">Gudovskiy et al. (2022)</a>   | 96.7        | 92.9        | 89.7                 | 97.4        | 33.1        | 33.2                 | 91.5        | 19.9        | 78.5        |
|               | PyramidalFlow <a href="#">Lei et al. (2023)</a>    | 58.3        | 38.3        | 54.5                 | 91.3        | 4.4         | 8.5                  | 73.7        | 4.4         | 47.4        |
|               | Rec. RD <a href="#">Deng &amp; Li (2022)</a>       | 99.8        | 99.5        | 96.6                 | 99.1        | 58.3        | 54.5                 | 97.2        | 37.5        | 88.0        |
|               | DiAD <a href="#">He et al. (2024b)</a>             | 88.3        | 81.5        | 74.3                 | 96.2        | 11.6        | 22.0                 | 87.7        | 12.4        | 66.0        |
|               | VITAD <a href="#">Zhang et al. (2023a)</a>         | 96.0        | 91.7        | 86.7                 | 99.3        | 39.8        | 46.9                 | 97.6        | 30.6        | 81.2        |
|               | InvAD <a href="#">Zhang et al. (2024a)</a>         | 98.3        | 95.7        | 96.6                 | 99.2        | 62.3        | 57.6                 | 97.3        | 40.5        | 88.0        |
|               | InvAD-lite <a href="#">Zhang et al. (2024a)</a>    | 96.7        | 83.4        | 96.6                 | 99.4        | 61.5        | 57.4                 | 97.9        | 40.2        | 85.6        |
|               | MambaAD <a href="#">He et al. (2024a)</a>          | 98.8        | 97.9        | 92.9                 | 99.2        | 55.4        | 53.4                 | 97.5        | 36.4        | 86.5        |
|               | Hybrid UniAD <a href="#">You et al. (2022)</a>     | 82.9        | 65.0        | 72.7                 | 97.6        | 14.0        | 24.0                 | 92.1        | 13.7        | 65.2        |
|               | RD++ <a href="#">Tien et al. (2023)</a>            | <b>100.</b> | <b>100.</b> | <b>100.</b>          | 99.3        | 66.3        | 59.8                 | 97.7        | 42.7        | 90.4        |
|               | DesTSeg <a href="#">Zhang et al. (2023c)</a>       | 90.7        | 77.3        | 87.5                 | 89.1        | 31.4        | 38.3                 | 81.2        | 23.7        | 72.6        |

Table A71: Benchmarked results on MPDD dataset [Jezek et al. \(2021\)](#) by the suggested metrics in [Sec. 3.3](#).

|             | Method | Image-level                                      |             |                      | Pixel-level |             |                      | mAU-PRO     | mIoU-max    | mAD         |
|-------------|--------|--------------------------------------------------|-------------|----------------------|-------------|-------------|----------------------|-------------|-------------|-------------|
|             |        | mAU-ROC                                          | mAP         | mF <sub>1</sub> -max | mAU-ROC     | mAP         | mF <sub>1</sub> -max |             |             |             |
| metal-plate | Aug.   | DRAEM <a href="#">Zavrtanik et al. (2021)</a>    | 71.7        | 89.7                 | 84.5        | 57.5        | 30.0                 | 21.2        | 25.7        | 57.8        |
|             |        | SimpleNet <a href="#">Liu et al. (2023)</a>      | <b>100.</b> | <b>100.</b>          | <b>100.</b> | 98.2        | 88.9                 | 81.3        | 88.1        | 94.6        |
|             |        | RealNet <a href="#">Zhang et al. (2024c)</a>     | <b>100.</b> | <b>100.</b>          | <b>100.</b> | 90.2        | 84.6                 | 80.4        | 80.7        | 92.0        |
|             | Emb.   | CFA <a href="#">Lee et al. (2022)</a>            | <b>100.</b> | <b>100.</b>          | <b>100.</b> | 98.8        | 92.6                 | 85.3        | 90.8        | 95.9        |
|             |        | PatchCore <a href="#">Roth et al. (2022)</a>     | <b>100.</b> | <b>100.</b>          | <b>100.</b> | 99.0        | 93.5                 | 86.1        | 94.1        | 96.6        |
|             |        | CFLOW-AD <a href="#">Gudovskiy et al. (2022)</a> | <b>100.</b> | <b>100.</b>          | <b>100.</b> | 98.6        | 89.7                 | 83.7        | 92.9        | 95.6        |
|             |        | PyramidalFlow <a href="#">Lei et al. (2023)</a>  | 78.3        | 92.4                 | 87.5        | 68.0        | 49.7                 | 40.2        | 29.1        | 66.4        |
|             | Rec.   | RD <a href="#">Deng &amp; Li (2022)</a>          | <b>100.</b> | <b>100.</b>          | <b>100.</b> | 99.1        | 92.6                 | 87.4        | <b>96.6</b> | 97.0        |
|             |        | DiAD <a href="#">He et al. (2024b)</a>           | 98.3        | 99.5                 | 98.6        | 87.2        | 54.3                 | 55.1        | 45.0        | 76.9        |
|             |        | ViTAD <a href="#">Zhang et al. (2023a)</a>       | <b>100.</b> | <b>100.</b>          | <b>100.</b> | <b>99.3</b> | <b>95.5</b>          | <b>88.2</b> | 94.8        | <b>97.2</b> |
|             |        | InvAD <a href="#">Zhang et al. (2024a)</a>       | <b>100.</b> | <b>100.</b>          | <b>100.</b> | 99.0        | 91.6                 | 86.6        | 95.7        | 96.6        |
|             |        | InvAD-lite <a href="#">Zhang et al. (2024a)</a>  | <b>100.</b> | <b>100.</b>          | <b>100.</b> | 98.6        | 88.9                 | 84.5        | 94.5        | 95.8        |
|             |        | MambaAD <a href="#">He et al. (2024a)</a>        | 99.8        | 99.9                 | 99.3        | 98.5        | 86.2                 | 84.3        | 94.7        | 95.3        |
|             | Hybrid | UniAD <a href="#">You et al. (2022)</a>          | 58.8        | 79.6                 | 85.0        | 93.3        | 50.4                 | 62.8        | 80.8        | 73.1        |
|             |        | RD++ <a href="#">Tien et al. (2023)</a>          | 99.9        | <b>100.</b>          | 99.3        | 99.0        | 91.1                 | 87.0        | 95.5        | 96.4        |
|             |        | DesTSeg <a href="#">Zhang et al. (2023c)</a>     | <b>100.</b> | <b>100.</b>          | <b>100.</b> | 96.9        | 93.8                 | 87.2        | 91.4        | 96.2        |
| tubes       | Aug.   | DRAEM <a href="#">Zavrtanik et al. (2021)</a>    | 57.4        | 73.4                 | 81.7        | 40.9        | 1.0                  | 3.5         | 15.6        | 43.0        |
|             |        | SimpleNet <a href="#">Liu et al. (2023)</a>      | 84.6        | 94.1                 | 84.6        | 97.9        | 42.4                 | 46.1        | 92.6        | 78.8        |
|             |        | RealNet <a href="#">Zhang et al. (2024c)</a>     | 91.3        | 95.9                 | 90.6        | 90.3        | 53.0                 | 55.2        | 81.2        | 81.3        |
|             | Emb.   | CFA <a href="#">Lee et al. (2022)</a>            | 85.6        | 94.4                 | 85.9        | 97.8        | 38.1                 | 43.7        | 91.7        | 78.2        |
|             |        | PatchCore <a href="#">Roth et al. (2022)</a>     | 90.4        | 96.6                 | 92.4        | 98.8        | 64.5                 | 63.8        | 95.5        | 86.9        |
|             |        | CFLOW-AD <a href="#">Gudovskiy et al. (2022)</a> | 68.0        | 85.0                 | 81.2        | 96.9        | 35.7                 | 39.6        | 88.2        | 71.6        |
|             |        | PyramidalFlow <a href="#">Lei et al. (2023)</a>  | 76.8        | 87.4                 | 83.2        | 92.5        | 8.4                  | 18.0        | 76.8        | 65.7        |
|             | Rec.   | RD <a href="#">Deng &amp; Li (2022)</a>          | 90.4        | 96.2                 | 88.5        | 98.9        | 64.7                 | 61.2        | 95.7        | 85.9        |
|             |        | DiAD <a href="#">He et al. (2024b)</a>           | 58.7        | 77.3                 | 81.2        | 85.6        | 2.8                  | 5.9         | 50.3        | 51.7        |
|             |        | ViTAD <a href="#">Zhang et al. (2023a)</a>       | 84.3        | 93.6                 | 84.5        | 98.5        | 52.5                 | 55.0        | 93.6        | 81.2        |
|             |        | InvAD <a href="#">Zhang et al. (2024a)</a>       | <b>96.6</b> | <b>98.7</b>          | <b>95.5</b> | <b>99.3</b> | 73.1                 | 69.0        | <b>97.4</b> | <b>90.8</b> |
|             |        | InvAD-lite <a href="#">Zhang et al. (2024a)</a>  | 91.6        | 96.8                 | 90.1        | 98.4        | 62.6                 | 63.0        | 94.3        | 86.2        |
|             |        | MambaAD <a href="#">He et al. (2024a)</a>        | 62.9        | 78.6                 | 81.9        | 96.5        | 26.7                 | 34.5        | 87.4        | 67.9        |
|             | Hybrid | UniAD <a href="#">You et al. (2022)</a>          | 67.3        | 81.6                 | 83.3        | 92.1        | 8.3                  | 14.7        | 72.7        | 62.2        |
|             |        | RD++ <a href="#">Tien et al. (2023)</a>          | 92.1        | 96.9                 | 90.0        | 99.2        | <b>73.6</b>          | <b>69.7</b> | 96.6        | 88.9        |
|             |        | DesTSeg <a href="#">Zhang et al. (2023c)</a>     | 84.0        | 92.3                 | 87.2        | 96.5        | 46.3                 | 46.7        | 89.9        | 78.8        |
| Avg         | Aug.   | DRAEM <a href="#">Zavrtanik et al. (2021)</a>    | 60.2        | 67.5                 | 75.1        | 50.4        | 5.4                  | 4.7         | 21.8        | 44.1        |
|             |        | SimpleNet <a href="#">Liu et al. (2023)</a>      | 90.6        | 94.1                 | 89.7        | 97.1        | 33.6                 | 35.7        | 90.0        | 77.8        |
|             |        | RealNet <a href="#">Zhang et al. (2024c)</a>     | 86.0        | 90.0                 | 87.3        | 74.7        | 39.2                 | 39.7        | 52.3        | 69.6        |
|             | Emb.   | CFA <a href="#">Lee et al. (2022)</a>            | 92.0        | 93.5                 | 90.2        | 95.7        | 29.0                 | 33.0        | 83.2        | 76.1        |
|             |        | PatchCore <a href="#">Roth et al. (2022)</a>     | 94.6        | 96.9                 | 93.4        | <b>98.9</b> | <b>46.1</b>          | <b>47.6</b> | <b>95.7</b> | <b>83.5</b> |
|             |        | CFLOW-AD <a href="#">Gudovskiy et al. (2022)</a> | 80.4        | 85.1                 | 84.7        | 97.3        | 28.4                 | 30.1        | 90.9        | 72.5        |
|             |        | PyramidalFlow <a href="#">Lei et al. (2023)</a>  | 72.5        | 76.2                 | 77.6        | 89.0        | 12.4                 | 15.8        | 68.5        | 60.9        |
|             | Rec.   | RD <a href="#">Deng &amp; Li (2022)</a>          | 90.3        | 92.8                 | 90.5        | 98.3        | 39.6                 | 40.6        | 95.2        | 79.8        |
|             |        | DiAD <a href="#">He et al. (2024b)</a>           | 85.8        | 89.2                 | 86.5        | 91.4        | 15.3                 | 19.2        | 66.1        | 64.8        |
|             |        | ViTAD <a href="#">Zhang et al. (2023a)</a>       | 87.4        | 90.8                 | 87.0        | 97.8        | 34.6                 | 37.8        | 92.9        | 77.1        |
|             |        | InvAD <a href="#">Zhang et al. (2024a)</a>       | <b>96.0</b> | <b>97.1</b>          | <b>94.5</b> | 98.5        | 44.1                 | 46.4        | 95.3        | <b>83.5</b> |
|             |        | InvAD-lite <a href="#">Zhang et al. (2024a)</a>  | 92.8        | 93.2                 | 91.4        | 98.3        | 41.4                 | 43.9        | 94.6        | 81.0        |
|             |        | MambaAD <a href="#">He et al. (2024a)</a>        | 89.2        | 93.1                 | 90.3        | 97.7        | 33.5                 | 38.6        | 92.8        | 78.3        |
|             | Hybrid | UniAD <a href="#">You et al. (2022)</a>          | 80.1        | 83.2                 | 85.1        | 95.4        | 19.0                 | 25.6        | 83.8        | 69.4        |
|             |        | RD++ <a href="#">Tien et al. (2023)</a>          | 90.6        | 93.3                 | 90.0        | 98.4        | 42.8                 | 43.0        | 95.3        | 80.6        |
|             |        | DesTSeg <a href="#">Zhang et al. (2023c)</a>     | 92.6        | 91.8                 | 92.8        | 90.8        | 30.6                 | 32.9        | 78.3        | 75.3        |

# T DETAILED QUANTITATIVE RESULTS ON MAD-REAL DATASET UNDER 300 EPOCHS

Table A72: Benchmarked results on MAD-Real dataset [Zhou et al. \(2024\)](#) by the suggested metrics in Sec. 3.3.

|          | Method                                           | Image-level |             |                      | Pixel-level |             |                      | mAU-PRO     | mIoU-max    | mAD         |
|----------|--------------------------------------------------|-------------|-------------|----------------------|-------------|-------------|----------------------|-------------|-------------|-------------|
|          |                                                  | mAU-ROC     | mAP         | mF <sub>1</sub> -max | mAU-ROC     | mAP         | mF <sub>1</sub> -max |             |             |             |
| Bear     | Aug.                                             |             |             |                      |             |             |                      |             |             |             |
|          | DRAEM <a href="#">Zavrtanik et al. (2021)</a>    | 62.5        | 91.6        | 90.6                 | 47.4        | 0.3         | 1.8                  | 25.3        | 0.9         | 50.1        |
|          | SimpleNet <a href="#">Liu et al. (2023)</a>      | 17.5        | 69.8        | 90.6                 | 74.6        | 1.2         | 4.9                  | 56.3        | 2.5         | 46.8        |
|          | Emb.                                             |             |             |                      |             |             |                      |             |             |             |
|          | CFA <a href="#">Lee et al. (2022)</a>            | 13.3        | 68.8        | 90.6                 | 99.0        | 3.9         | 9.6                  | 96.2        | 5.1         | 54.9        |
|          | PatchCore <a href="#">Roth et al. (2022)</a>     | 84.2        | 96.8        | 91.7                 | <b>99.6</b> | <b>17.6</b> | <b>29.5</b>          | <b>98.6</b> | <b>17.3</b> | <b>76.1</b> |
|          | CFLOW-AD <a href="#">Gudovskiy et al. (2022)</a> | 77.5        | 94.6        | 92.3                 | 99.4        | 6.3         | 12.2                 | 97.7        | 6.5         | 71.0        |
|          | PyramidalFlow <a href="#">Lei et al. (2023)</a>  | 7.5         | 67.7        | 90.6                 | 98.5        | 2.8         | 5.3                  | 94.9        | 2.7         | 52.8        |
|          | Rec.                                             |             |             |                      |             |             |                      |             |             |             |
|          | RD <a href="#">Deng &amp; Li (2022)</a>          | <b>86.7</b> | 96.4        | <b>96.0</b>          | 97.7        | 6.9         | 10.5                 | 92.9        | 5.5         | <u>72.5</u> |
|          | DiAD <a href="#">He et al. (2024b)</a>           | <b>85.0</b> | <b>97.0</b> | 90.6                 | 97.5        | 1.8         | 5.4                  | 92.0        | 2.8         | <u>67.0</u> |
|          | ViTAD <a href="#">Zhang et al. (2023a)</a>       | 42.5        | 79.5        | 90.6                 | 96.3        | 3.1         | 4.4                  | 88.0        | 2.2         | 59.4        |
| Bird     | InvAD <a href="#">Zhang et al. (2024a)</a>       | 80.8        | 96.0        | 92.0                 | <b>99.6</b> | <b>15.9</b> | <b>25.0</b>          | <b>98.5</b> | <b>14.3</b> | <u>74.7</u> |
|          | InvAD-lite <a href="#">Zhang et al. (2024a)</a>  | 47.5        | 82.3        | 90.6                 | 97.8        | 4.2         | 5.7                  | 93.3        | 2.9         | 61.9        |
|          | MambaAD <a href="#">He et al. (2024a)</a>        | 58.3        | 87.2        | 90.6                 | 99.2        | <u>11.2</u> | <u>18.8</u>          | 97.1        | 10.4        | 67.6        |
|          | Hybrid                                           |             |             |                      |             |             |                      |             |             |             |
|          | UniAD <a href="#">You et al. (2022)</a>          | 78.3        | 95.5        | 92.3                 | 99.0        | 5.3         | 12.8                 | 96.4        | 6.8         | 71.0        |
|          | RD++ <a href="#">Tien et al. (2023)</a>          | 74.2        | 93.9        | 92.3                 | 99.0        | 8.1         | 15.0                 | 96.6        | 8.1         | 70.7        |
|          | DesTSeg <a href="#">Zhang et al. (2023c)</a>     | 22.5        | 75.9        | 90.6                 | 91.4        | 0.5         | 1.2                  | 71.4        | 0.6         | 52.1        |
|          | Aug.                                             |             |             |                      |             |             |                      |             |             |             |
|          | DRAEM <a href="#">Zavrtanik et al. (2021)</a>    | 23.6        | 74.8        | 89.8                 | 58.7        | 0.7         | 1.4                  | 20.0        | 0.7         | 41.5        |
|          | SimpleNet <a href="#">Liu et al. (2023)</a>      | 60.0        | 86.9        | 89.8                 | 58.3        | 0.6         | 1.4                  | 20.8        | 0.7         | 49.6        |
|          | Emb.                                             |             |             |                      |             |             |                      |             |             |             |
|          | CFA <a href="#">Lee et al. (2022)</a>            | 54.5        | 83.0        | 89.8                 | 86.7        | 4.7         | 10.9                 | 57.1        | 5.8         | 57.8        |
| Elephant | PatchCore <a href="#">Roth et al. (2022)</a>     | 71.8        | 92.6        | <u>93.6</u>          | <b>96.4</b> | <b>32.2</b> | <b>39.7</b>          | <b>84.2</b> | <b>24.8</b> | <u>74.6</u> |
|          | CFLOW-AD <a href="#">Gudovskiy et al. (2022)</a> | 38.2        | 80.2        | 89.8                 | 89.5        | 2.9         | 6.3                  | 64.2        | 3.2         | 55.1        |
|          | PyramidalFlow <a href="#">Lei et al. (2023)</a>  | 15.5        | 68.6        | 89.8                 | 90.7        | 2.7         | 6.4                  | 66.5        | 3.3         | 49.8        |
|          | Rec.                                             |             |             |                      |             |             |                      |             |             |             |
|          | RD <a href="#">Deng &amp; Li (2022)</a>          | 23.6        | 72.4        | 89.8                 | 87.0        | 6.8         | 16.3                 | 56.7        | 8.9         | 51.8        |
|          | DiAD <a href="#">He et al. (2024b)</a>           | <b>90.9</b> | <b>98.3</b> | 95.2                 | 94.5        | 19.5        | 28.0                 | 77.3        | 16.3        | 72.0        |
|          | ViTAD <a href="#">Zhang et al. (2023a)</a>       | 62.7        | 87.5        | 91.7                 | 89.9        | 8.3         | 16.9                 | 61.9        | 9.2         | 62.4        |
|          | InvAD <a href="#">Zhang et al. (2024a)</a>       | 89.1        | 97.6        | 91.7                 | 93.4        | <u>25.0</u> | <u>37.3</u>          | 75.4        | <u>22.9</u> | <b>75.3</b> |
|          | InvAD-lite <a href="#">Zhang et al. (2024a)</a>  | 84.5        | 96.4        | 91.7                 | <u>96.2</u> | <u>23.1</u> | <u>29.3</u>          | <u>83.5</u> | 17.2        | <u>74.4</u> |
|          | MambaAD <a href="#">He et al. (2024a)</a>        | 77.3        | 93.1        | <b>95.7</b>          | <u>95.0</u> | <u>11.3</u> | 21.4                 | 78.7        | 12.0        | 70.1        |
|          | Hybrid                                           |             |             |                      |             |             |                      |             |             |             |
|          | UniAD <a href="#">You et al. (2022)</a>          | 41.8        | 78.2        | 89.8                 | 86.9        | 2.6         | 6.3                  | 65.7        | 3.2         | 55.2        |
| Parrot   | RD++ <a href="#">Tien et al. (2023)</a>          | 50.9        | 86.6        | 89.8                 | 90.0        | 8.2         | 17.8                 | 64.4        | 9.8         | 60.4        |
|          | DesTSeg <a href="#">Zhang et al. (2023c)</a>     | 72.7        | 93.3        | 91.7                 | 86.2        | 10.5        | 15.2                 | 59.3        | 8.2         | 64.3        |
|          | Aug.                                             |             |             |                      |             |             |                      |             |             |             |
|          | DRAEM <a href="#">Zavrtanik et al. (2021)</a>    | <b>62.2</b> | <b>87.9</b> | 87.8                 | 47.6        | 0.3         | 0.7                  | 13.5        | 0.4         | 47.4        |
|          | SimpleNet <a href="#">Liu et al. (2023)</a>      | 5.6         | 61.1        | 87.8                 | 64.1        | 0.8         | 2.8                  | 24.7        | 1.4         | 37.3        |
|          | Emb.                                             |             |             |                      |             |             |                      |             |             |             |
|          | CFA <a href="#">Lee et al. (2022)</a>            | 33.3        | 70.9        | 87.8                 | 87.5        | 6.0         | 11.0                 | 59.6        | 5.8         | 52.5        |
|          | PatchCore <a href="#">Roth et al. (2022)</a>     | 27.8        | 69.5        | 87.8                 | 93.7        | <b>11.1</b> | <b>18.3</b>          | 78.8        | <b>10.1</b> | 56.1        |
|          | CFLOW-AD <a href="#">Gudovskiy et al. (2022)</a> | 30.0        | 74.7        | 87.8                 | 90.9        | <u>7.0</u>  | <u>11.4</u>          | 67.3        | 6.1         | 54.2        |
|          | PyramidalFlow <a href="#">Lei et al. (2023)</a>  | 60.0        | 86.0        | 87.8                 | 92.5        | 2.7         | 5.4                  | 75.1        | 2.8         | <b>60.9</b> |
|          | Rec.                                             |             |             |                      |             |             |                      |             |             |             |
|          | RD <a href="#">Deng &amp; Li (2022)</a>          | 48.9        | 84.7        | 87.8                 | 88.4        | 2.1         | 5.2                  | 63.2        | 2.7         | <u>56.8</u> |
| Elephant | DiAD <a href="#">He et al. (2024b)</a>           | 20.0        | 64.3        | <b>90.0</b>          | 91.8        | 2.0         | 4.4                  | 73.1        | 2.2         | 49.4        |
|          | ViTAD <a href="#">Zhang et al. (2023a)</a>       | 43.3        | 79.9        | 87.8                 | <b>95.5</b> | <u>9.8</u>  | <u>15.9</u>          | <b>83.6</b> | <u>8.7</u>  | <u>60.8</u> |
|          | InvAD <a href="#">Zhang et al. (2024a)</a>       | 35.6        | 72.2        | 87.8                 | 92.9        | 5.0         | 11.3                 | 76.6        | 6.0         | 55.8        |
|          | InvAD-lite <a href="#">Zhang et al. (2024a)</a>  | 35.6        | 78.4        | 87.8                 | 91.6        | 4.9         | 11.3                 | 73.7        | 6.0         | 56.3        |
|          | MambaAD <a href="#">He et al. (2024a)</a>        | 24.4        | 67.4        | 87.8                 | 89.2        | 2.3         | 5.6                  | 70.6        | 2.9         | 50.9        |
|          | Hybrid                                           |             |             |                      |             |             |                      |             |             |             |
|          | UniAD <a href="#">You et al. (2022)</a>          | 13.3        | 63.1        | 87.8                 | 78.4        | 1.6         | 5.6                  | 38.8        | 2.9         | 42.9        |
|          | RD++ <a href="#">Tien et al. (2023)</a>          | 40.0        | 77.1        | 87.8                 | 87.5        | 2.1         | 5.0                  | 63.9        | 2.6         | 54.0        |
|          | DesTSeg <a href="#">Zhang et al. (2023c)</a>     | 12.2        | 64.6        | 87.8                 | 68.7        | 0.8         | 2.3                  | 36.5        | 1.2         | 41.0        |
|          | Aug.                                             |             |             |                      |             |             |                      |             |             |             |
|          | DRAEM <a href="#">Zavrtanik et al. (2021)</a>    | <b>30.4</b> | <b>76.4</b> | <b>92.0</b>          | 49.3        | 0.6         | 1.3                  | 13.5        | 0.6         | 41.2        |
|          | SimpleNet <a href="#">Liu et al. (2023)</a>      | 24.3        | 73.9        | 90.2                 | 58.3        | 0.8         | 1.8                  | 35.1        | 0.9         | 43.4        |
| Parrot   | Emb.                                             |             |             |                      |             |             |                      |             |             |             |
|          | CFA <a href="#">Lee et al. (2022)</a>            | 5.2         | 66.2        | 90.2                 | 42.0        | 0.5         | 1.3                  | 16.9        | 0.7         | 34.5        |
|          | PatchCore <a href="#">Roth et al. (2022)</a>     | 5.2         | 66.2        | 90.2                 | <b>81.7</b> | <b>2.1</b>  | <b>5.1</b>           | <b>64.0</b> | <b>2.6</b>  | <b>46.0</b> |
|          | CFLOW-AD <a href="#">Gudovskiy et al. (2022)</a> | 15.7        | 67.9        | 90.2                 | 66.7        | <u>1.0</u>  | <u>2.5</u>           | 41.7        | <u>1.2</u>  | <u>43.0</u> |
|          | PyramidalFlow <a href="#">Lei et al. (2023)</a>  | 9.6         | 69.4        | 90.2                 | 67.7        | <u>1.0</u>  | 2.2                  | 32.4        | 1.1         | 41.1        |
|          | Rec.                                             |             |             |                      |             |             |                      |             |             |             |
|          | RD <a href="#">Deng &amp; Li (2022)</a>          | 5.2         | 65.5        | 90.2                 | 64.5        | 0.9         | 2.1                  | 37.0        | 1.1         | 39.9        |
|          | DiAD <a href="#">He et al. (2024b)</a>           | 0.0         | 64.3        | 90.2                 | 56.3        | 0.7         | 1.7                  | 37.9        | 0.9         | 35.9        |
|          | ViTAD <a href="#">Zhang et al. (2023a)</a>       | 10.4        | 67.8        | 90.2                 | 70.3        | <u>1.1</u>  | <u>2.6</u>           | 40.7        | <u>1.3</u>  | 42.4        |
|          | InvAD <a href="#">Zhang et al. (2024a)</a>       | 5.2         | 65.7        | 90.2                 | 68.7        | <u>1.1</u>  | 2.4                  | 44.6        | <u>1.2</u>  | 41.5        |
|          | InvAD-lite <a href="#">Zhang et al. (2024a)</a>  | 3.5         | 65.1        | 90.2                 | 71.4        | <u>1.1</u>  | <u>2.5</u>           | 42.2        | <u>1.3</u>  | 41.1        |
|          | MambaAD <a href="#">He et al. (2024a)</a>        | 4.3         | 65.4        | 90.2                 | <u>72.5</u> | <u>1.1</u>  | <u>2.5</u>           | 46.1        | <u>1.3</u>  | 41.9        |
| Hybrid   | UniAD <a href="#">You et al. (2022)</a>          | 10.4        | 67.2        | 90.2                 | 61.5        | 0.8         | 1.9                  | 38.0        | 0.9         | 40.7        |
|          | RD++ <a href="#">Tien et al. (2023)</a>          | 2.6         | 64.8        | <u>90.2</u>          | 64.2        | 0.9         | 2.0                  | 35.7        | 1.0         | 39.1        |
|          | DesTSeg <a href="#">Zhang et al. (2023c)</a>     | 7.8         | 67.0        | 90.2                 | 66.4        | <u>1.1</u>  | <u>2.5</u>           | 30.5        | <u>1.3</u>  | 40.1        |



Table A73: Benchmarked results on MAD\_Real dataset [Zhou et al. \(2024\)](#) by the suggested metrics in Sec. 3.3.

|          | Method                                             | Image-level |             |                      | Pixel-level |             |                      | mAU-PRO     | mIoU-max    | mAD         |
|----------|----------------------------------------------------|-------------|-------------|----------------------|-------------|-------------|----------------------|-------------|-------------|-------------|
|          |                                                    | mAU-ROC     | mAP         | mF <sub>1</sub> -max | mAU-ROC     | mAP         | mF <sub>1</sub> -max |             |             |             |
| Pig      | Aug. DRAEM <a href="#">Zavrtanik et al. (2021)</a> | 43.5        | 72.6        | <b>89.5</b>          | 61.9        | 0.6         | 0.8                  | 26.9        | 0.4         | 45.5        |
|          | SimpleNet <a href="#">Liu et al. (2023)</a>        | 14.1        | 63.4        | 87.2                 | 76.6        | 1.7         | 6.1                  | 37.0        | 3.2         | 42.6        |
|          | Emb. CFA <a href="#">Lee et al. (2022)</a>         | 56.5        | 78.2        | <b>89.5</b>          | 93.0        | 5.0         | 11.3                 | 72.6        | 6.0         | 60.1        |
|          | PatchCore <a href="#">Roth et al. (2022)</a>       | 56.5        | 78.8        | <b>89.5</b>          | 98.5        | 19.9        | 28.7                 | 89.7        | 16.7        | 67.1        |
|          | CFLOW-AD <a href="#">Gudovskiy et al. (2022)</a>   | 57.6        | 78.4        | 87.2                 | 96.8        | 7.1         | 12.7                 | 86.1        | 6.8         | 62.5        |
|          | PyramidalFlow <a href="#">Lei et al. (2023)</a>    | 50.6        | 80.7        | <b>89.5</b>          | 96.4        | 6.8         | 13.4                 | 83.4        | 7.2         | 61.8        |
|          | Rec. RD <a href="#">Deng &amp; Li (2022)</a>       | 60.0        | 80.1        | 87.2                 | 98.0        | <b>20.0</b> | 29.6                 | 90.2        | 17.4        | <b>67.6</b> |
|          | DiAD <a href="#">He et al. (2024b)</a>             | 57.6        | 79.8        | 87.2                 | 96.4        | 9.0         | 18.9                 | 81.6        | 10.4        | 61.5        |
|          | ViTAD <a href="#">Zhang et al. (2023a)</a>         | 44.7        | 75.3        | 87.2                 | 97.6        | 9.2         | 19.4                 | 88.0        | 10.7        | 61.3        |
|          | InvAD <a href="#">Zhang et al. (2024a)</a>         | <b>64.7</b> | <b>81.2</b> | 88.9                 | 98.0        | 11.2        | 24.2                 | 88.1        | 13.8        | 66.8        |
|          | InvAD-lite <a href="#">Zhang et al. (2024a)</a>    | 57.6        | 78.1        | 88.2                 | <b>98.6</b> | <u>17.5</u> | <b>31.3</b>          | <b>93.2</b> | <b>18.5</b> | 67.4        |
|          | MambaAD <a href="#">He et al. (2024a)</a>          | 42.4        | 74.5        | 87.2                 | 97.3        | 8.5         | 18.6                 | 87.3        | 10.2        | 60.5        |
|          | Hybrid UniAD <a href="#">You et al. (2022)</a>     | 48.2        | 76.9        | <b>89.5</b>          | 89.5        | 2.1         | 4.9                  | 61.6        | 2.5         | 55.5        |
|          | RD++ <a href="#">Tien et al. (2023)</a>            | 56.5        | 79.2        | <b>89.5</b>          | 98.0        | 13.8        | 23.6                 | 91.2        | 13.3        | 65.9        |
|          | DesTSeg <a href="#">Zhang et al. (2023c)</a>       | 45.9        | 75.2        | 87.2                 | 84.8        | 1.4         | 3.3                  | 50.5        | 1.7         | 52.2        |
| Puppy    | Aug. DRAEM <a href="#">Zavrtanik et al. (2021)</a> | 57.0        | 87.0        | 88.9                 | 31.2        | 0.2         | 0.7                  | 13.7        | 0.3         | 44.5        |
|          | SimpleNet <a href="#">Liu et al. (2023)</a>        | 52.0        | 82.2        | 88.9                 | 90.8        | 1.7         | 4.4                  | 65.1        | 2.3         | 57.4        |
|          | Emb. CFA <a href="#">Lee et al. (2022)</a>         | 82.0        | 94.8        | 93.0                 | 98.5        | 6.7         | 14.0                 | 92.0        | 7.5         | 71.4        |
|          | PatchCore <a href="#">Roth et al. (2022)</a>       | <b>100.</b> | <b>100.</b> | <b>100.</b>          | 99.2        | 13.4        | 25.1                 | 92.1        | 14.3        | 78.7        |
|          | CFLOW-AD <a href="#">Gudovskiy et al. (2022)</a>   | 70.0        | 91.3        | 93.0                 | 99.2        | <b>31.8</b> | <u>34.5</u>          | 93.1        | 20.9        | 74.7        |
|          | PyramidalFlow <a href="#">Lei et al. (2023)</a>    | 68.0        | 91.2        | 88.9                 | 95.9        | 11.7        | 20.7                 | 77.6        | 11.5        | 67.1        |
|          | Rec. RD <a href="#">Deng &amp; Li (2022)</a>       | 82.0        | 95.6        | 88.9                 | 95.7        | 5.5         | 8.5                  | 83.8        | 4.4         | 68.6        |
|          | DiAD <a href="#">He et al. (2024b)</a>             | 91.0        | 97.7        | <u>95.2</u>          | 95.8        | 3.4         | 9.1                  | 80.8        | 4.8         | 67.6        |
|          | ViTAD <a href="#">Zhang et al. (2023a)</a>         | 65.0        | 90.2        | 88.9                 | 90.5        | 1.0         | 2.6                  | 69.6        | 1.3         | 61.1        |
|          | InvAD <a href="#">Zhang et al. (2024a)</a>         | <b>100.</b> | <b>100.</b> | <b>100.</b>          | <b>99.4</b> | 28.6        | <u>31.3</u>          | 93.7        | 18.5        | <b>81.6</b> |
|          | InvAD-lite <a href="#">Zhang et al. (2024a)</a>    | 97.0        | 99.3        | 97.4                 | 95.9        | 3.4         | 9.2                  | 82.8        | 4.8         | 72.9        |
|          | MambaAD <a href="#">He et al. (2024a)</a>          | 92.0        | 97.8        | <u>95.2</u>          | 98.7        | <u>26.1</u> | <b>36.1</b>          | <b>94.2</b> | <b>22.0</b> | 79.4        |
|          | Hybrid UniAD <a href="#">You et al. (2022)</a>     | 78.0        | 94.7        | 88.9                 | 98.7        | 12.0        | 20.2                 | 92.8        | 11.2        | 71.6        |
|          | RD++ <a href="#">Tien et al. (2023)</a>            | 65.0        | 90.3        | 90.9                 | 97.3        | 4.0         | 7.5                  | 90.5        | 3.9         | 65.9        |
|          | DesTSeg <a href="#">Zhang et al. (2023c)</a>       | 54.0        | 82.7        | 88.9                 | 93.1        | 1.5         | 3.9                  | 66.6        | 2.0         | 58.2        |
| Scorpion | Aug. DRAEM <a href="#">Zavrtanik et al. (2021)</a> | 46.1        | 83.9        | <b>90.2</b>          | 41.4        | 1.2         | 2.9                  | 10.8        | 1.5         | 43.7        |
|          | SimpleNet <a href="#">Liu et al. (2023)</a>        | 47.0        | 84.1        | <b>90.2</b>          | <u>83.5</u> | <b>9.0</b>  | <u>15.8</u>          | 50.3        | <u>8.6</u>  | <b>56.7</b> |
|          | Emb. CFA <a href="#">Lee et al. (2022)</a>         | 27.8        | 80.3        | <b>90.2</b>          | 61.0        | <u>5.4</u>  | <u>13.1</u>          | 26.3        | <u>7.0</u>  | 46.3        |
|          | PatchCore <a href="#">Roth et al. (2022)</a>       | 13.0        | 70.7        | <b>90.2</b>          | <b>88.2</b> | <u>8.8</u>  | <b>17.0</b>          | <b>61.6</b> | <b>9.3</b>  | <u>50.9</u> |
|          | CFLOW-AD <a href="#">Gudovskiy et al. (2022)</a>   | 54.8        | 87.2        | <b>90.2</b>          | 77.9        | 4.2         | 7.5                  | 34.0        | 3.9         | <u>54.1</u> |
|          | PyramidalFlow <a href="#">Lei et al. (2023)</a>    | 47.0        | 84.3        | <b>90.2</b>          | 65.5        | 2.6         | 5.8                  | 20.3        | 3.0         | 48.7        |
|          | Rec. RD <a href="#">Deng &amp; Li (2022)</a>       | <b>55.7</b> | <b>87.9</b> | <b>90.2</b>          | 66.3        | 2.1         | 4.9                  | 21.8        | 2.5         | <u>50.9</u> |
|          | DiAD <a href="#">He et al. (2024b)</a>             | 11.3        | 71.8        | <b>90.2</b>          | 71.9        | 3.1         | 6.8                  | 30.7        | 3.5         | 40.8        |
|          | ViTAD <a href="#">Zhang et al. (2023a)</a>         | 29.6        | 79.5        | <b>90.2</b>          | 62.7        | 1.9         | 4.2                  | 16.8        | 2.1         | 43.9        |
|          | InvAD <a href="#">Zhang et al. (2024a)</a>         | 31.3        | 80.4        | <b>90.2</b>          | 74.4        | 3.1         | 6.5                  | 30.8        | 3.4         | 48.0        |
|          | InvAD-lite <a href="#">Zhang et al. (2024a)</a>    | 32.2        | 79.2        | <b>90.2</b>          | 74.6        | 3.0         | 6.0                  | 28.1        | 3.1         | 47.6        |
|          | MambaAD <a href="#">He et al. (2024a)</a>          | 42.6        | 80.8        | <b>90.2</b>          | 75.0        | 2.9         | 6.3                  | 27.1        | 3.2         | 49.5        |
|          | Hybrid UniAD <a href="#">You et al. (2022)</a>     | 27.0        | 73.9        | <b>90.2</b>          | 78.6        | 4.2         | 9.1                  | 41.2        | 4.8         | 48.5        |
|          | RD++ <a href="#">Tien et al. (2023)</a>            | 25.2        | 75.8        | <b>90.2</b>          | 70.7        | 2.5         | 5.8                  | 24.6        | 3.0         | 44.8        |
|          | DesTSeg <a href="#">Zhang et al. (2023c)</a>       | 27.8        | 77.9        | <b>90.2</b>          | 68.1        | 3.2         | 8.0                  | 25.3        | 4.2         | 45.7        |
| Turtle   | Aug. DRAEM <a href="#">Zavrtanik et al. (2021)</a> | 58.1        | 85.3        | 91.3                 | 24.4        | 0.3         | 1.5                  | 9.2         | 0.8         | 43.5        |
|          | SimpleNet <a href="#">Liu et al. (2023)</a>        | 63.8        | 87.9        | 89.4                 | 94.6        | 7.0         | 15.1                 | 81.8        | 8.1         | 65.0        |
|          | Emb. CFA <a href="#">Lee et al. (2022)</a>         | <b>100.</b> | <b>100.</b> | <b>100.</b>          | 99.3        | <u>41.5</u> | <u>42.7</u>          | 96.8        | 27.2        | <u>85.0</u> |
|          | PatchCore <a href="#">Roth et al. (2022)</a>       | <b>100.</b> | <b>100.</b> | <b>100.</b>          | 99.5        | <u>43.1</u> | <u>48.4</u>          | 97.9        | <u>31.9</u> | <u>86.1</u> |
|          | CFLOW-AD <a href="#">Gudovskiy et al. (2022)</a>   | 99.0        | 99.8        | 97.7                 | 99.1        | 28.4        | 38.0                 | 96.5        | 23.5        | 82.2        |
|          | PyramidalFlow <a href="#">Lei et al. (2023)</a>    | 93.3        | 98.5        | 93.3                 | 98.4        | 23.9        | 33.3                 | 95.3        | 20.0        | 78.9        |
|          | Rec. RD <a href="#">Deng &amp; Li (2022)</a>       | 95.2        | 99.0        | 95.2                 | 98.5        | 23.2        | 30.4                 | 94.9        | 18.0        | 79.1        |
|          | DiAD <a href="#">He et al. (2024b)</a>             | 74.3        | 94.2        | 89.4                 | 93.2        | 7.5         | 13.5                 | 83.5        | 7.2         | 65.1        |
|          | ViTAD <a href="#">Zhang et al. (2023a)</a>         | 83.8        | 96.1        | 93.3                 | 95.6        | 6.2         | 13.2                 | 85.6        | 7.0         | 70.6        |
|          | InvAD <a href="#">Zhang et al. (2024a)</a>         | <b>100.</b> | <b>100.</b> | <b>100.</b>          | <b>99.7</b> | <b>51.9</b> | <b>50.0</b>          | <b>98.4</b> | <b>33.3</b> | <b>87.5</b> |
|          | InvAD-lite <a href="#">Zhang et al. (2024a)</a>    | 99.0        | 99.8        | 97.7                 | 98.0        | 15.5        | 21.6                 | 94.5        | 12.1        | 78.1        |
|          | MambaAD <a href="#">He et al. (2024a)</a>          | <b>100.</b> | <b>100.</b> | <b>100.</b>          | 99.3        | 32.8        | 39.2                 | 97.2        | 24.4        | 83.6        |
|          | Hybrid UniAD <a href="#">You et al. (2022)</a>     | 98.1        | 99.6        | 97.6                 | 98.2        | 22.8        | 31.5                 | 91.0        | 18.7        | 79.7        |
|          | RD++ <a href="#">Tien et al. (2023)</a>            | <b>100.</b> | <b>100.</b> | <b>100.</b>          | 99.2        | 25.1        | 35.8                 | 97.0        | 21.8        | 82.1        |
|          | DesTSeg <a href="#">Zhang et al. (2023c)</a>       | 54.3        | 86.7        | 89.4                 | 95.2        | 9.8         | 16.1                 | 77.0        | 8.8         | 63.2        |



Table A74: Benchmarked results on MAD\_Real dataset [Zhou et al. \(2024\)](#) by the suggested metrics in [Sec. 3.3](#).

|         | Method | Image-level                                      |             |                      | Pixel-level |             |                      | mAU-PRO     | mIoU-max    | mAD         |             |
|---------|--------|--------------------------------------------------|-------------|----------------------|-------------|-------------|----------------------|-------------|-------------|-------------|-------------|
|         |        | mAU-ROC                                          | mAP         | mF <sub>1</sub> -max | mAU-ROC     | mAP         | mF <sub>1</sub> -max |             |             |             |             |
| Unicorn | Aug.   | DRAEM <a href="#">Zavrtanik et al. (2021)</a>    | 36.2        | 79.8                 | 89.4        | 43.0        | 0.2                  | 0.5         | 9.9         | 0.2         | 40.9        |
|         |        | SimpleNet <a href="#">Liu et al. (2023)</a>      | 19.0        | 68.8                 | 89.4        | 81.8        | 0.9                  | 2.2         | 49.5        | 1.1         | 46.3        |
|         |        | CFA <a href="#">Lee et al. (2022)</a>            | 31.4        | 73.8                 | 89.4        | 67.8        | 0.8                  | 3.6         | 33.2        | 1.9         | 45.6        |
|         | Emb.   | PatchCore <a href="#">Roth et al. (2022)</a>     | 43.8        | 74.1                 | <b>93.3</b> | <b>97.3</b> | <b>6.8</b>           | <b>14.1</b> | <b>90.3</b> | <b>7.6</b>  | <b>61.3</b> |
|         |        | CFLOW-AD <a href="#">Gudovskiy et al. (2022)</a> | <b>63.8</b> | <b>90.9</b>          | <b>91.3</b> | <b>90.1</b> | <b>1.5</b>           | 3.3         | 65.7        | 1.7         | <b>61.1</b> |
|         |        | PyramidalFlow <a href="#">Lei et al. (2023)</a>  | <b>65.7</b> | 84.4                 | 89.4        | 82.2        | 0.9                  | 2.2         | 51.8        | 1.1         | 57.1        |
|         | Rec.   | RD <a href="#">Deng &amp; Li (2022)</a>          | 21.0        | 71.0                 | 89.4        | 73.5        | 0.5                  | 1.3         | 33.8        | 0.6         | 43.9        |
|         |        | DiAD <a href="#">He et al. (2024b)</a>           | 62.9        | <b>91.4</b>          | 89.4        | 86.0        | 1.0                  | 2.4         | 60.4        | 1.2         | 56.2        |
|         |        | ViTAD <a href="#">Zhang et al. (2023a)</a>       | 20.0        | 72.2                 | 89.4        | 73.9        | 0.5                  | 1.1         | 31.7        | 0.6         | 43.7        |
|         |        | InvAD <a href="#">Zhang et al. (2024a)</a>       | 31.4        | 72.8                 | 89.4        | 89.9        | 1.6                  | 4.3         | 67.3        | 2.2         | 52.7        |
|         |        | InvAD-lite <a href="#">Zhang et al. (2024a)</a>  | 32.4        | 72.3                 | 89.4        | 84.4        | 1.4                  | 4.3         | 57.0        | 2.2         | 50.7        |
|         |        | MambaAD <a href="#">He et al. (2024a)</a>        | 18.1        | 67.6                 | 89.4        | 81.7        | 0.8                  | 2.1         | 50.0        | 1.1         | 46.0        |
|         | Hybrid | UniAD <a href="#">You et al. (2022)</a>          | 16.2        | 66.6                 | 89.4        | 89.3        | 1.4                  | 3.7         | 66.1        | 1.9         | 48.8        |
|         |        | RD++ <a href="#">Tien et al. (2023)</a>          | 29.5        | 75.7                 | 89.4        | 81.4        | 0.7                  | 1.5         | 43.7        | 0.8         | 48.3        |
|         |        | DesTSeg <a href="#">Zhang et al. (2023c)</a>     | 21.0        | 69.4                 | 89.4        | 76.4        | 0.5                  | 1.3         | 31.0        | 0.6         | 43.6        |
| Whale   | Aug.   | DRAEM <a href="#">Zavrtanik et al. (2021)</a>    | 43.1        | 85.6                 | 92.8        | 20.2        | 0.1                  | 0.4         | 6.4         | 0.2         | 40.3        |
|         |        | SimpleNet <a href="#">Liu et al. (2023)</a>      | 58.1        | 91.5                 | 92.8        | 89.1        | 2.5                  | 8.2         | 68.5        | 4.3         | 61.4        |
|         |        | CFA <a href="#">Lee et al. (2022)</a>            | 80.6        | 96.2                 | 93.5        | 98.6        | 29.3                 | 32.2        | 90.5        | 19.2        | 76.4        |
|         | Emb.   | PatchCore <a href="#">Roth et al. (2022)</a>     | 95.0        | 99.1                 | <b>98.5</b> | 99.7        | <b>46.8</b>          | 47.4        | 97.8        | 31.0        | 85.2        |
|         |        | CFLOW-AD <a href="#">Gudovskiy et al. (2022)</a> | 67.5        | 94.4                 | 92.8        | 99.1        | 17.5                 | 24.7        | 95.1        | 14.1        | 72.0        |
|         |        | PyramidalFlow <a href="#">Lei et al. (2023)</a>  | 89.4        | 98.2                 | 95.5        | 98.0        | 20.2                 | 25.6        | 90.6        | 14.7        | 76.5        |
|         | Rec.   | RD <a href="#">Deng &amp; Li (2022)</a>          | 81.2        | 96.7                 | 92.8        | 98.9        | 19.2                 | 23.5        | 94.9        | 13.3        | 74.7        |
|         |        | DiAD <a href="#">He et al. (2024b)</a>           | 86.9        | 98.0                 | 94.1        | 94.6        | 2.9                  | 5.4         | 77.2        | 2.8         | 65.6        |
|         |        | ViTAD <a href="#">Zhang et al. (2023a)</a>       | 42.5        | 85.4                 | 92.8        | 96.3        | 3.6                  | 8.5         | 83.6        | 4.5         | 60.8        |
|         |        | InvAD <a href="#">Zhang et al. (2024a)</a>       | <b>96.9</b> | <b>99.5</b>          | 97.0        | <b>99.8</b> | 45.3                 | <b>50.1</b> | <b>98.7</b> | <b>33.4</b> | <b>85.6</b> |
|         |        | InvAD-lite <a href="#">Zhang et al. (2024a)</a>  | 83.8        | 96.6                 | 95.5        | 99.5        | 39.4                 | 41.9        | 98.2        | 26.5        | 80.9        |
|         |        | MambaAD <a href="#">He et al. (2024a)</a>        | 87.5        | 97.6                 | 95.5        | 99.7        | 33.8                 | 41.7        | 98.6        | 26.3        | 81.0        |
|         | Hybrid | UniAD <a href="#">You et al. (2022)</a>          | 42.5        | 87.3                 | 92.8        | 98.1        | 11.1                 | 19.6        | 91.1        | 10.9        | 64.6        |
|         |        | RD++ <a href="#">Tien et al. (2023)</a>          | 79.4        | 95.9                 | 92.8        | 99.2        | 27.9                 | 29.8        | 96.1        | 17.5        | 76.3        |
|         |        | DesTSeg <a href="#">Zhang et al. (2023c)</a>     | 42.5        | 86.4                 | 92.8        | 95.1        | 2.6                  | 6.0         | 79.3        | 3.1         | 59.8        |
| Avg     | Aug.   | DRAEM <a href="#">Zavrtanik et al. (2021)</a>    | 46.3        | 82.5                 | 90.2        | 42.5        | 0.5                  | 1.2         | 14.9        | 0.6         | 43.9        |
|         |        | SimpleNet <a href="#">Liu et al. (2023)</a>      | 36.1        | 77.0                 | 89.6        | 77.2        | 2.6                  | 6.3         | 48.9        | 3.3         | 50.7        |
|         |        | CFA <a href="#">Lee et al. (2022)</a>            | 48.5        | 81.2                 | 91.4        | 83.3        | 10.4                 | 15.0        | 64.1        | 8.6         | 58.5        |
|         | Emb.   | PatchCore <a href="#">Roth et al. (2022)</a>     | 59.7        | 84.8                 | <b>93.5</b> | <b>95.4</b> | <b>20.2</b>          | <b>27.3</b> | <b>85.5</b> | <b>16.6</b> | <b>68.2</b> |
|         |        | CFLOW-AD <a href="#">Gudovskiy et al. (2022)</a> | 57.4        | 85.9                 | 91.2        | 90.9        | 10.8                 | 15.3        | 74.1        | 8.8         | 63.0        |
|         |        | PyramidalFlow <a href="#">Lei et al. (2023)</a>  | 50.6        | 82.9                 | 90.5        | 88.6        | 7.5                  | 12.0        | 68.8        | 6.7         | 59.4        |
|         | Rec.   | RD <a href="#">Deng &amp; Li (2022)</a>          | 56.0        | 84.9                 | 90.7        | 86.9        | 8.7                  | 13.2        | 66.9        | 7.4         | 60.6        |
|         |        | DiAD <a href="#">He et al. (2024b)</a>           | 58.0        | 85.7                 | 91.1        | 87.8        | 5.1                  | 9.6         | 69.4        | 5.2         | 58.1        |
|         |        | ViTAD <a href="#">Zhang et al. (2023a)</a>       | 44.5        | 81.3                 | 90.2        | 86.9        | 4.5                  | 8.9         | 65.0        | 4.8         | 56.7        |
|         |        | InvAD <a href="#">Zhang et al. (2024a)</a>       | <b>63.5</b> | <b>86.5</b>          | 92.7        | 91.6        | 18.9                 | 24.2        | 77.2        | 14.9        | 66.9        |
|         |        | InvAD-lite <a href="#">Zhang et al. (2024a)</a>  | 57.3        | 84.8                 | 91.9        | 90.8        | 11.4                 | 16.3        | 74.7        | 9.5         | 63.1        |
|         |        | MambaAD <a href="#">He et al. (2024a)</a>        | 54.7        | 83.1                 | 92.2        | 90.8        | 13.1                 | 19.2        | 74.7        | 11.4        | 63.1        |
|         | Hybrid | UniAD <a href="#">You et al. (2022)</a>          | 45.4        | 80.3                 | 90.8        | 87.8        | 6.4                  | 11.6        | 68.3        | 6.4         | 57.8        |
|         |        | RD++ <a href="#">Tien et al. (2023)</a>          | 52.3        | 84.0                 | 91.3        | 88.7        | 9.3                  | 14.4        | 70.4        | 8.2         | 60.8        |
|         |        | DesTSeg <a href="#">Zhang et al. (2023c)</a>     | 36.1        | 77.9                 | 89.8        | 82.5        | 3.2                  | 6.0         | 52.7        | 3.2         | 52.0        |

## U DETAILED QUANTITATIVE RESULTS ON MAD\_SIM DATASET UNDER 300 EPOCHS

Table A75: Benchmarked results on MAD\_Sim dataset [Zhou et al. \(2024\)](#) by the suggested metrics in [Sec. 3.3](#).

|           | Method                                             | Image-level |             |                      | Pixel-level |             |                      | mAU-PRO     | mIoU-max    | mAD         |
|-----------|----------------------------------------------------|-------------|-------------|----------------------|-------------|-------------|----------------------|-------------|-------------|-------------|
|           |                                                    | mAU-ROC     | mAP         | mF <sub>1</sub> -max | mAU-ROC     | mAP         | mF <sub>1</sub> -max |             |             |             |
| 01Gorilla | Aug. DRAEM <a href="#">Zavrtanik et al. (2021)</a> | 54.4        | 91.6        | <b>95.1</b>          | 45.4        | 0.7         | 2.0                  | 19.4        | 1.0         | 48.6        |
|           | SimpleNet <a href="#">Liu et al. (2023)</a>        | 53.0        | 91.5        | <b>94.9</b>          | 90.9        | 2.7         | 5.7                  | 65.5        | 2.9         | 60.5        |
|           | Emb. CFA <a href="#">Lee et al. (2022)</a>         | 55.9        | 93.6        | <b>94.9</b>          | 79.0        | <u>7.2</u>  | <u>15.4</u>          | 55.8        | <u>8.3</u>  | 60.4        |
|           | CFLOW-AD <a href="#">Gudovskiy et al. (2022)</a>   | 54.4        | 92.8        | <b>94.9</b>          | 90.8        | 4.8         | 5.1                  | 65.4        | 2.6         | 61.1        |
|           | PyramidalFlow <a href="#">Lei et al. (2023)</a>    | 46.5        | 90.4        | <b>94.9</b>          | 91.5        | 3.7         | 6.0                  | 75.1        | 3.1         | 60.7        |
|           | Rec. RD <a href="#">Deng &amp; Li (2022)</a>       | 62.7        | 93.3        | <b>95.1</b>          | 93.1        | 4.5         | 9.0                  | 76.4        | 4.7         | 64.7        |
|           | DiAD <a href="#">He et al. (2024b)</a>             | 64.4        | 94.6        | <b>94.9</b>          | 91.6        | 3.6         | 8.3                  | 64.6        | 4.3         | 60.3        |
|           | ViTAD <a href="#">Zhang et al. (2023a)</a>         | 66.1        | 93.9        | <b>95.1</b>          | <u>93.7</u> | 5.9         | 10.6                 | 76.3        | 5.6         | <u>65.8</u> |
|           | InvAD <a href="#">Zhang et al. (2024a)</a>         | 67.4        | <b>95.7</b> | <b>94.9</b>          | <b>95.2</b> | <b>17.1</b> | <b>24.1</b>          | <b>82.0</b> | <b>13.7</b> | <b>70.3</b> |
|           | InvAD-lite <a href="#">Zhang et al. (2024a)</a>    | <b>70.6</b> | 95.5        | <b>94.9</b>          | <u>94.1</u> | <u>8.0</u>  | <u>15.1</u>          | 78.3        | <u>8.2</u>  | 67.9        |
|           | MambaAD <a href="#">He et al. (2024a)</a>          | 65.2        | 93.8        | <b>94.9</b>          | 92.8        | 5.0         | 10.7                 | 75.6        | 5.7         | 65.3        |
|           | Hybrid UniAD <a href="#">You et al. (2022)</a>     | 52.6        | 92.3        | <b>94.9</b>          | 92.7        | 6.3         | 11.0                 | 79.7        | 5.8         | 63.7        |
|           | RD++ <a href="#">Tien et al. (2023)</a>            | 53.6        | 91.1        | <b>94.9</b>          | 92.7        | 4.0         | 8.3                  | 74.6        | 4.3         | 62.4        |
|           | DesTSeg <a href="#">Zhang et al. (2023c)</a>       | 46.5        | 90.3        | <b>94.9</b>          | 58.2        | 5.0         | 9.0                  | 34.4        | 4.7         | 51.9        |
|           | Aug. DRAEM <a href="#">Zavrtanik et al. (2021)</a> | 41.9        | 90.6        | <u>95.2</u>          | 47.3        | 0.4         | 0.8                  | 14.1        | 0.4         | 45.8        |
|           | SimpleNet <a href="#">Liu et al. (2023)</a>        | 55.0        | 91.6        | <u>95.2</u>          | 83.2        | 1.3         | 2.6                  | 61.3        | 1.3         | 58.9        |
| 02Unicorn | Emb. CFA <a href="#">Lee et al. (2022)</a>         | 63.8        | 94.8        | <b>95.5</b>          | 67.8        | 1.4         | 3.9                  | 32.1        | 2.0         | 55.5        |
|           | CFLOW-AD <a href="#">Gudovskiy et al. (2022)</a>   | 59.0        | 93.5        | <u>95.2</u>          | 84.4        | 2.3         | 3.4                  | 55.4        | 1.7         | 59.5        |
|           | PyramidalFlow <a href="#">Lei et al. (2023)</a>    | 37.0        | 87.7        | <b>95.5</b>          | 80.3        | 1.1         | 2.3                  | 52.2        | 1.2         | 53.7        |
|           | Rec. RD <a href="#">Deng &amp; Li (2022)</a>       | 61.4        | 94.1        | <u>95.2</u>          | 85.3        | 2.0         | 4.1                  | 70.7        | 2.1         | 62.0        |
|           | DiAD <a href="#">He et al. (2024b)</a>             | 79.3        | 97.2        | <u>95.4</u>          | 80.0        | 1.6         | 4.5                  | 48.0        | 2.3         | 58.0        |
|           | ViTAD <a href="#">Zhang et al. (2023a)</a>         | 63.9        | 94.7        | <u>95.2</u>          | 86.5        | 2.4         | 5.8                  | 67.8        | 3.0         | 62.6        |
|           | InvAD <a href="#">Zhang et al. (2024a)</a>         | <b>79.7</b> | <b>97.6</b> | <u>95.4</u>          | <b>87.3</b> | <u>3.8</u>  | <u>9.8</u>           | <b>74.6</b> | <u>5.2</u>  | <b>67.4</b> |
|           | InvAD-lite <a href="#">Zhang et al. (2024a)</a>    | 71.3        | 96.0        | <u>95.2</u>          | 86.6        | <u>2.9</u>  | <u>6.4</u>           | <u>73.2</u> | <u>3.3</u>  | <u>64.9</u> |
|           | MambaAD <a href="#">He et al. (2024a)</a>          | 65.7        | 95.2        | <u>95.4</u>          | 84.3        | 2.1         | 4.7                  | 68.7        | 2.4         | 62.7        |
|           | Hybrid UniAD <a href="#">You et al. (2022)</a>     | 71.4        | 96.2        | <u>95.4</u>          | 87.1        | 2.5         | 6.3                  | 64.5        | <u>3.3</u>  | <u>63.9</u> |
|           | RD++ <a href="#">Tien et al. (2023)</a>            | 60.6        | 93.8        | <u>95.2</u>          | 85.1        | 2.3         | 4.6                  | 69.2        | 2.3         | 61.8        |
|           | DesTSeg <a href="#">Zhang et al. (2023c)</a>       | 72.0        | 96.1        | <b>95.5</b>          | 55.9        | <b>6.4</b>  | <b>10.5</b>          | 40.0        | <b>5.6</b>  | 58.0        |
|           | Aug. DRAEM <a href="#">Zavrtanik et al. (2021)</a> | 36.6        | 88.0        | <b>95.4</b>          | 46.6        | 1.3         | 1.5                  | 15.3        | 0.8         | 44.8        |
|           | SimpleNet <a href="#">Liu et al. (2023)</a>        | 55.2        | 91.6        | <b>95.4</b>          | 85.5        | 2.6         | 5.6                  | 58.6        | 2.9         | 59.4        |
|           | Emb. CFA <a href="#">Lee et al. (2022)</a>         | 31.3        | 87.1        | <b>95.4</b>          | 63.8        | 2.9         | 10.0                 | 36.7        | 5.3         | 49.8        |
|           | CFLOW-AD <a href="#">Gudovskiy et al. (2022)</a>   | 40.1        | 90.5        | <b>95.4</b>          | 84.8        | 3.8         | 5.1                  | 53.1        | 2.6         | 56.0        |
| 03Mallard | PyramidalFlow <a href="#">Lei et al. (2023)</a>    | 44.2        | 89.9        | <b>95.4</b>          | 83.9        | 2.5         | 5.0                  | 56.3        | 2.6         | 56.7        |
|           | Rec. RD <a href="#">Deng &amp; Li (2022)</a>       | 44.4        | 89.1        | <b>95.4</b>          | 83.5        | 3.4         | 7.9                  | 56.7        | 4.1         | 57.1        |
|           | DiAD <a href="#">He et al. (2024b)</a>             | <b>73.9</b> | <b>96.0</b> | <b>95.4</b>          | 83.0        | 2.4         | 4.6                  | 48.7        | 2.4         | 57.7        |
|           | ViTAD <a href="#">Zhang et al. (2023a)</a>         | 46.6        | 91.4        | <b>95.4</b>          | 85.2        | <u>5.3</u>  | <u>11.2</u>          | 60.4        | <u>5.9</u>  | 59.2        |
|           | InvAD <a href="#">Zhang et al. (2024a)</a>         | 46.5        | 91.3        | <b>95.4</b>          | 85.9        | <b>7.8</b>  | <b>13.4</b>          | <u>61.5</u> | <b>7.2</b>  | 59.9        |
|           | InvAD-lite <a href="#">Zhang et al. (2024a)</a>    | 40.9        | 90.2        | <b>95.4</b>          | 85.2        | <u>6.0</u>  | <u>11.1</u>          | 60.2        | <u>5.9</u>  | 58.1        |
|           | MambaAD <a href="#">He et al. (2024a)</a>          | 55.2        | 93.6        | <b>95.4</b>          | 84.2        | 4.9         | 10.5                 | 57.9        | <u>5.6</u>  | <b>60.4</b> |
|           | Hybrid UniAD <a href="#">You et al. (2022)</a>     | 33.9        | 87.0        | <b>95.4</b>          | <b>86.1</b> | 3.8         | 8.9                  | <b>61.8</b> | 4.7         | 56.1        |
|           | RD++ <a href="#">Tien et al. (2023)</a>            | 37.1        | 87.9        | <b>95.4</b>          | 84.0        | 3.4         | 7.8                  | 57.1        | 4.1         | 55.8        |
|           | DesTSeg <a href="#">Zhang et al. (2023c)</a>       | 33.2        | 88.1        | <b>95.4</b>          | 58.7        | 3.4         | 8.0                  | 39.0        | 4.1         | 49.8        |
|           | Aug. DRAEM <a href="#">Zavrtanik et al. (2021)</a> | 45.6        | 87.8        | 94.9                 | 47.2        | 0.6         | 1.3                  | 12.0        | 0.7         | 45.7        |
|           | SimpleNet <a href="#">Liu et al. (2023)</a>        | 48.7        | 90.2        | 94.9                 | 85.7        | 2.3         | 4.7                  | 60.9        | 2.4         | 58.2        |
|           | Emb. CFA <a href="#">Lee et al. (2022)</a>         | 40.8        | 90.8        | 94.9                 | 71.1        | 2.4         | 3.6                  | 38.6        | 1.8         | 52.2        |
|           | CFLOW-AD <a href="#">Gudovskiy et al. (2022)</a>   | 63.1        | 94.7        | 94.9                 | 86.3        | 4.1         | 6.3                  | 57.1        | 3.2         | 61.3        |
|           | PyramidalFlow <a href="#">Lei et al. (2023)</a>    | 16.8        | 81.8        | 94.9                 | 76.6        | 1.2         | 3.1                  | 39.7        | 1.6         | 47.3        |
| 04Turtle  | Rec. RD <a href="#">Deng &amp; Li (2022)</a>       | 64.1        | 94.1        | 94.9                 | 91.1        | <u>9.3</u>  | 16.8                 | 72.6        | 9.2         | 65.9        |
|           | DiAD <a href="#">He et al. (2024b)</a>             | <b>85.5</b> | <b>98.3</b> | <b>96.3</b>          | <u>91.8</u> | <u>7.1</u>  | 14.3                 | 63.1        | 7.7         | 65.2        |
|           | ViTAD <a href="#">Zhang et al. (2023a)</a>         | 59.0        | 93.5        | 94.9                 | 91.0        | 7.9         | 15.4                 | 70.5        | 8.3         | 64.3        |
|           | InvAD <a href="#">Zhang et al. (2024a)</a>         | 83.0        | 97.7        | <u>95.1</u>          | <b>93.4</b> | <b>15.5</b> | <b>25.9</b>          | <b>78.8</b> | <b>14.9</b> | <b>72.7</b> |
|           | InvAD-lite <a href="#">Zhang et al. (2024a)</a>    | 76.8        | 96.9        | <u>95.6</u>          | <u>92.3</u> | <u>12.4</u> | <u>21.3</u>          | 75.4        | <u>11.9</u> | 70.1        |
|           | MambaAD <a href="#">He et al. (2024a)</a>          | 66.6        | 95.2        | 94.9                 | 91.0        | <u>9.3</u>  | <u>17.7</u>          | 70.8        | <u>9.7</u>  | 66.4        |
|           | Hybrid UniAD <a href="#">You et al. (2022)</a>     | 55.7        | 92.0        | 94.9                 | 88.9        | 4.3         | 7.6                  | 70.9        | 4.0         | 61.9        |
|           | RD++ <a href="#">Tien et al. (2023)</a>            | 60.1        | 94.2        | 94.9                 | 90.2        | 7.0         | 13.2                 | 69.8        | 7.1         | 64.1        |
|           | DesTSeg <a href="#">Zhang et al. (2023c)</a>       | 34.1        | 88.5        | 94.9                 | 55.0        | 1.6         | 3.6                  | 38.8        | 1.8         | 48.6        |

Table A76: Benchmarked results on MAD\_Sim dataset [Zhou et al. \(2024\)](#) by the suggested metrics in [Sec. 3.3](#).

|              | Method                                             | Image-level |             |                      | Pixel-level |             |                      | mAU-PRO     | mIoU-max    | mAD         |
|--------------|----------------------------------------------------|-------------|-------------|----------------------|-------------|-------------|----------------------|-------------|-------------|-------------|
|              |                                                    | mAU-ROC     | mAP         | mF <sub>1</sub> -max | mAU-ROC     | mAP         | mF <sub>1</sub> -max |             |             |             |
| 05Whale      | Aug. DRAEM <a href="#">Zavrtanik et al. (2021)</a> | 50.5        | 90.3        | <b>94.4</b>          | 47.6        | 0.6         | 1.5                  | 20.6        | 0.8         | 48.0        |
|              | SimpleNet <a href="#">Liu et al. (2023)</a>        | 50.4        | 89.2        | <b>94.4</b>          | 85.1        | 1.8         | 3.7                  | 62.4        | 1.9         | 58.1        |
|              | Emb. CFA <a href="#">Lee et al. (2022)</a>         | 51.6        | 91.5        | <b>94.4</b>          | 71.3        | 2.2         | 4.1                  | 41.0        | 2.1         | 54.4        |
|              | CFLOW-AD <a href="#">Gudovskiy et al. (2022)</a>   | 54.0        | 91.1        | <b>94.4</b>          | 85.3        | 2.8         | 4.4                  | 63.2        | 2.2         | 59.4        |
|              | PyramidalFlow <a href="#">Lei et al. (2023)</a>    | 27.7        | 82.7        | <b>94.4</b>          | 78.9        | 1.2         | 2.8                  | 52.5        | 1.4         | 51.1        |
|              | Rec. RD <a href="#">Deng &amp; Li (2022)</a>       | 52.4        | 91.0        | <b>94.4</b>          | 86.8        | 3.3         | 7.1                  | 74.0        | 3.7         | 61.0        |
|              | DiAD <a href="#">He et al. (2024b)</a>             | 51.0        | 90.8        | <b>94.4</b>          | 81.1        | 2.6         | 7.5                  | 51.9        | 3.9         | 54.2        |
|              | ViTAD <a href="#">Zhang et al. (2023a)</a>         | 58.5        | 92.7        | <b>94.4</b>          | 88.3        | 4.1         | 8.3                  | 76.5        | 4.3         | 63.1        |
|              | InvAD <a href="#">Zhang et al. (2024a)</a>         | 74.0        | 96.3        | <b>94.4</b>          | 89.9        | <b>8.8</b>  | <b>16.9</b>          | <b>81.1</b> | <b>9.2</b>  | <b>68.7</b> |
|              | InvAD-lite <a href="#">Zhang et al. (2024a)</a>    | 68.1        | <u>95.2</u> | <b>94.4</b>          | <u>89.3</u> | <u>6.2</u>  | <u>11.2</u>          | <u>78.5</u> | <u>5.9</u>  | <u>66.1</u> |
|              | MambaAD <a href="#">He et al. (2024a)</a>          | 60.4        | 93.5        | <b>94.4</b>          | 87.3        | 4.4         | 8.9                  | 74.1        | 4.6         | 63.2        |
|              | Hybrid UniAD <a href="#">You et al. (2022)</a>     | <b>79.4</b> | <b>97.1</b> | <b>94.4</b>          | <b>90.8</b> | <u>5.2</u>  | <u>11.6</u>          | <u>80.1</u> | <u>6.2</u>  | <u>68.6</u> |
|              | RD++ <a href="#">Tien et al. (2023)</a>            | 54.1        | 91.8        | <b>94.4</b>          | 86.5        | 3.5         | 7.0                  | 73.0        | 3.6         | 61.3        |
|              | DesTSeg <a href="#">Zhang et al. (2023c)</a>       | 57.1        | 92.1        | <b>94.4</b>          | 61.4        | 3.2         | 8.3                  | 55.5        | 4.3         | 56.6        |
|              | Aug. DRAEM <a href="#">Zavrtanik et al. (2021)</a> | 44.1        | 87.6        | <u>94.5</u>          | 48.6        | 1.0         | 2.3                  | 27.2        | 1.1         | 47.6        |
|              | SimpleNet <a href="#">Liu et al. (2023)</a>        | 52.9        | 91.4        | <u>94.4</u>          | 91.8        | 5.1         | 9.4                  | 75.9        | 4.9         | 62.6        |
| 06Bird       | Emb. CFA <a href="#">Lee et al. (2022)</a>         | 65.1        | 92.8        | <u>94.5</u>          | 73.3        | 4.0         | 9.7                  | 47.2        | 5.1         | 58.8        |
|              | CFLOW-AD <a href="#">Gudovskiy et al. (2022)</a>   | 63.8        | 91.8        | <u>94.4</u>          | 90.4        | 3.8         | 7.1                  | 70.8        | 3.7         | 63.2        |
|              | PyramidalFlow <a href="#">Lei et al. (2023)</a>    | 77.2        | 96.3        | <u>94.4</u>          | <u>92.7</u> | <u>5.9</u>  | <u>11.1</u>          | <u>77.8</u> | <u>5.9</u>  | <u>68.1</u> |
|              | Rec. RD <a href="#">Deng &amp; Li (2022)</a>       | 60.4        | 92.0        | <u>94.4</u>          | 90.6        | 4.9         | 8.4                  | 75.2        | 4.4         | 63.5        |
|              | DiAD <a href="#">He et al. (2024b)</a>             | 77.3        | <u>97.0</u> | <u>94.4</u>          | <b>93.6</b> | <b>6.5</b>  | <b>12.9</b>          | <u>77.3</u> | <b>6.9</b>  | 65.6        |
|              | ViTAD <a href="#">Zhang et al. (2023a)</a>         | 65.7        | 93.5        | <u>94.5</u>          | 91.2        | 4.9         | 9.8                  | 76.1        | 5.2         | 65.0        |
|              | InvAD <a href="#">Zhang et al. (2024a)</a>         | <b>82.8</b> | <b>97.4</b> | <b>94.9</b>          | <u>91.9</u> | <u>6.3</u>  | <u>12.8</u>          | <b>78.0</b> | <u>6.8</u>  | <b>69.5</b> |
|              | InvAD-lite <a href="#">Zhang et al. (2024a)</a>    | 72.0        | 95.5        | <u>94.5</u>          | 91.6        | 5.8         | 10.0                 | 77.0        | 5.3         | 66.7        |
|              | MambaAD <a href="#">He et al. (2024a)</a>          | 66.9        | 94.7        | <u>94.7</u>          | 91.1        | 4.7         | 8.6                  | 76.1        | 4.5         | 65.3        |
|              | Hybrid UniAD <a href="#">You et al. (2022)</a>     | 67.0        | 93.2        | <u>94.4</u>          | 90.8        | 4.8         | 9.1                  | 74.8        | 4.8         | 64.9        |
|              | RD++ <a href="#">Tien et al. (2023)</a>            | 60.0        | 91.4        | <u>94.5</u>          | 90.8        | 4.8         | 8.3                  | 75.4        | 4.3         | 63.4        |
|              | DesTSeg <a href="#">Zhang et al. (2023c)</a>       | 68.2        | 93.5        | <u>94.5</u>          | 60.3        | 4.1         | 8.8                  | 40.5        | 4.6         | 56.9        |
|              | Aug. DRAEM <a href="#">Zavrtanik et al. (2021)</a> | 56.3        | 87.8        | <u>92.8</u>          | 45.4        | 0.5         | 1.2                  | 16.4        | 0.6         | 47.4        |
|              | SimpleNet <a href="#">Liu et al. (2023)</a>        | 55.0        | 87.5        | <u>92.8</u>          | 87.7        | 1.9         | 4.1                  | 64.6        | 2.1         | 59.0        |
|              | Emb. CFA <a href="#">Lee et al. (2022)</a>         | 60.8        | 91.7        | <u>93.0</u>          | 77.1        | 3.2         | 7.0                  | 47.4        | 3.6         | 57.8        |
|              | CFLOW-AD <a href="#">Gudovskiy et al. (2022)</a>   | 66.9        | 92.8        | <u>92.8</u>          | 89.9        | 3.8         | 5.0                  | 66.2        | 2.6         | 62.7        |
| 07Owl        | PyramidalFlow <a href="#">Lei et al. (2023)</a>    | 48.4        | 85.1        | <u>93.0</u>          | 90.0        | 3.5         | 7.8                  | 71.1        | 4.1         | 59.3        |
|              | Rec. RD <a href="#">Deng &amp; Li (2022)</a>       | 62.2        | 91.8        | <u>93.0</u>          | 91.9        | 5.3         | 9.4                  | 77.7        | 4.9         | 64.2        |
|              | DiAD <a href="#">He et al. (2024b)</a>             | 62.0        | 91.4        | <u>92.8</u>          | 94.4        | 6.1         | 13.1                 | 72.8        | 7.0         | 61.8        |
|              | ViTAD <a href="#">Zhang et al. (2023a)</a>         | 65.6        | 91.9        | <u>92.8</u>          | 92.7        | 5.2         | 10.9                 | 77.8        | 5.7         | 65.0        |
|              | InvAD <a href="#">Zhang et al. (2024a)</a>         | <b>72.6</b> | <b>94.3</b> | <u>93.0</u>          | <b>94.6</b> | <b>12.5</b> | <b>22.7</b>          | <b>83.6</b> | <b>12.8</b> | <b>70.0</b> |
|              | InvAD-lite <a href="#">Zhang et al. (2024a)</a>    | 66.6        | <u>93.1</u> | <b>93.2</b>          | <u>93.3</u> | <u>7.6</u>  | <u>13.7</u>          | <u>80.1</u> | <u>7.3</u>  | <u>66.5</u> |
|              | MambaAD <a href="#">He et al. (2024a)</a>          | 67.5        | <u>93.5</u> | <u>92.8</u>          | 91.5        | 4.8         | 9.3                  | 76.0        | 4.9         | 65.0        |
|              | Hybrid UniAD <a href="#">You et al. (2022)</a>     | 63.7        | 92.1        | <u>93.0</u>          | 92.5        | 4.9         | 9.8                  | 77.6        | 5.2         | 64.6        |
|              | RD++ <a href="#">Tien et al. (2023)</a>            | 66.1        | 92.5        | <u>92.8</u>          | 92.2        | 5.2         | 9.0                  | 78.4        | 4.7         | 65.0        |
|              | DesTSeg <a href="#">Zhang et al. (2023c)</a>       | 64.8        | 92.4        | <b>93.2</b>          | 54.3        | <u>11.1</u> | 10.0                 | 39.1        | 5.3         | 56.0        |
|              | Aug. DRAEM <a href="#">Zavrtanik et al. (2021)</a> | 58.0        | 88.3        | <u>93.0</u>          | 47.1        | 0.5         | 1.1                  | 18.6        | 0.6         | 48.3        |
|              | SimpleNet <a href="#">Liu et al. (2023)</a>        | 55.1        | 88.3        | <u>93.2</u>          | 87.3        | 1.9         | 3.9                  | 65.6        | 2.0         | 59.3        |
|              | Emb. CFA <a href="#">Lee et al. (2022)</a>         | 53.8        | 90.6        | <u>93.0</u>          | 72.0        | 2.2         | 3.8                  | 36.8        | 1.9         | 53.9        |
|              | CFLOW-AD <a href="#">Gudovskiy et al. (2022)</a>   | 60.8        | 90.8        | <u>93.2</u>          | 86.6        | 1.7         | 3.4                  | 58.3        | 1.7         | 59.6        |
|              | PyramidalFlow <a href="#">Lei et al. (2023)</a>    | 65.2        | 93.2        | <u>93.0</u>          | 82.5        | 1.2         | 2.6                  | 58.6        | 1.3         | 60.0        |
|              | Rec. RD <a href="#">Deng &amp; Li (2022)</a>       | 66.0        | 93.2        | <u>93.4</u>          | 88.0        | 2.0         | 3.6                  | 67.2        | 1.9         | 62.2        |
| 08Sabertooth | DiAD <a href="#">He et al. (2024b)</a>             | 69.2        | 94.0        | <b>94.5</b>          | 86.1        | 1.9         | 3.4                  | 51.3        | 1.7         | 57.2        |
|              | ViTAD <a href="#">Zhang et al. (2023a)</a>         | 61.6        | 91.3        | <u>93.2</u>          | 89.0        | 2.2         | 4.0                  | 68.0        | 2.0         | 61.4        |
|              | InvAD <a href="#">Zhang et al. (2024a)</a>         | <b>78.0</b> | <b>95.8</b> | <u>93.4</u>          | <b>91.3</b> | <b>3.9</b>  | <b>6.2</b>           | <b>74.7</b> | <b>3.2</b>  | <b>66.5</b> |
|              | InvAD-lite <a href="#">Zhang et al. (2024a)</a>    | 73.7        | 94.6        | <u>93.4</u>          | 89.4        | 3.1         | 4.6                  | 69.4        | 2.4         | 64.4        |
|              | MambaAD <a href="#">He et al. (2024a)</a>          | 64.4        | 92.6        | <u>93.4</u>          | 87.1        | 2.2         | 3.5                  | 63.9        | 1.8         | 61.3        |
|              | Hybrid UniAD <a href="#">You et al. (2022)</a>     | 62.5        | 91.0        | <u>93.2</u>          | <u>89.5</u> | <u>2.5</u>  | <u>4.2</u>           | <u>74.5</u> | <u>2.1</u>  | <u>62.5</u> |
|              | RD++ <a href="#">Tien et al. (2023)</a>            | 63.2        | 91.9        | <u>93.0</u>          | 88.1        | 2.3         | 3.7                  | 66.6        | 1.9         | 61.4        |
|              | DesTSeg <a href="#">Zhang et al. (2023c)</a>       | <u>70.0</u> | 93.6        | <u>93.2</u>          | 52.0        | 2.3         | 4.0                  | 33.9        | 2.0         | 54.3        |

Table A77: Benchmarked results on MAD\_Sim dataset [Zhou et al. \(2024\)](#) by the suggested metrics in [Sec. 3.3](#).

|          | Method                                             | Image-level |             |             | Pixel-level |             |             | mAU-PRO     | mIoU-max    | mAD         |
|----------|----------------------------------------------------|-------------|-------------|-------------|-------------|-------------|-------------|-------------|-------------|-------------|
|          |                                                    | mAU-ROC     | mAP         | mF1-max     | mAU-ROC     | mAP         | mF1-max     |             |             |             |
| 09Swan   | Aug. DRAEM <a href="#">Zavrtanik et al. (2021)</a> | 46.6        | 86.6        | 93.1        | 47.7        | 0.6         | 1.4         | 19.9        | 0.7         | 46.4        |
|          | SimpleNet <a href="#">Liu et al. (2023)</a>        | 49.8        | 85.9        | 93.1        | 86.1        | 1.9         | 3.9         | 62.4        | 2.0         | 57.4        |
|          | Emb. CFA <a href="#">Lee et al. (2022)</a>         | 54.9        | 88.2        | 93.1        | 72.0        | 2.0         | 6.7         | 37.8        | 3.5         | 54.2        |
|          | CFLOW-AD <a href="#">Gudovskiy et al. (2022)</a>   | 47.0        | 86.9        | 93.1        | 85.7        | 2.2         | 3.9         | 60.1        | 2.0         | 56.8        |
|          | PyramidalFlow <a href="#">Lei et al. (2023)</a>    | 43.7        | 85.4        | 93.1        | 80.2        | 1.3         | 2.9         | 53.9        | 1.5         | 54.3        |
|          | Rec. RD <a href="#">Deng &amp; Li (2022)</a>       | 55.8        | 89.3        | 93.1        | 87.7        | 2.4         | 4.6         | 71.0        | 2.3         | 60.4        |
|          | DiAD <a href="#">He et al. (2024b)</a>             | <b>78.8</b> | <b>95.5</b> | <b>94.3</b> | 87.8        | <b>9.2</b>  | <b>16.7</b> | 57.8        | <b>9.1</b>  | 62.9        |
|          | ViTAD <a href="#">Zhang et al. (2023a)</a>         | 54.1        | 88.1        | 93.2        | 90.1        | 3.1         | 6.2         | 73.7        | 3.2         | 60.9        |
|          | InvAD <a href="#">Zhang et al. (2024a)</a>         | 65.8        | 92.6        | 93.2        | <b>91.8</b> | 6.2         | 11.6        | <b>80.0</b> | 6.2         | <b>65.6</b> |
|          | InvAD-lite <a href="#">Zhang et al. (2024a)</a>    | 60.1        | 90.5        | 93.1        | 90.1        | 4.1         | 8.3         | 76.8        | 4.3         | 63.0        |
|          | MambaAD <a href="#">He et al. (2024a)</a>          | 56.3        | 89.5        | 93.1        | 87.3        | 2.5         | 4.4         | 69.4        | 2.2         | 60.3        |
|          | Hybrid UniAD <a href="#">You et al. (2022)</a>     | 58.4        | 89.7        | 93.1        | 89.5        | 3.2         | 6.8         | 74.7        | 3.5         | 62.0        |
|          | RD++ <a href="#">Tien et al. (2023)</a>            | 53.9        | 89.4        | 93.2        | 87.6        | 2.4         | 4.4         | 69.8        | 2.3         | 59.9        |
|          | DesTSeg <a href="#">Zhang et al. (2023c)</a>       | 53.3        | 89.8        | 93.1        | 51.5        | 2.2         | 3.2         | 36.0        | 1.6         | 51.0        |
|          | Aug. DRAEM <a href="#">Zavrtanik et al. (2021)</a> | 36.8        | 81.6        | 92.7        | 47.2        | 0.6         | 1.3         | 20.8        | 0.7         | 43.9        |
|          | SimpleNet <a href="#">Liu et al. (2023)</a>        | 44.9        | 85.1        | 92.7        | 91.3        | 2.8         | 5.2         | 76.4        | 2.7         | 59.1        |
| 10Sheep  | Emb. CFA <a href="#">Lee et al. (2022)</a>         | 66.4        | 92.3        | 92.7        | 71.9        | 2.9         | 7.4         | 50.2        | 3.8         | 58.5        |
|          | CFLOW-AD <a href="#">Gudovskiy et al. (2022)</a>   | 63.0        | 90.1        | 92.9        | 91.9        | 3.9         | 6.8         | 79.2        | 3.5         | 63.7        |
|          | PyramidalFlow <a href="#">Lei et al. (2023)</a>    | 58.6        | 90.6        | 92.7        | 90.6        | 2.2         | 5.0         | 75.9        | 2.6         | 62.0        |
|          | Rec. RD <a href="#">Deng &amp; Li (2022)</a>       | 62.6        | 91.8        | 92.7        | 92.5        | 5.1         | 8.8         | 84.1        | 4.6         | 65.0        |
|          | DiAD <a href="#">He et al. (2024b)</a>             | <b>87.4</b> | <b>97.3</b> | <b>94.3</b> | 93.6        | 4.5         | 8.8         | 76.6        | 4.6         | 66.1        |
|          | ViTAD <a href="#">Zhang et al. (2023a)</a>         | 65.0        | 91.1        | 92.7        | 93.4        | 4.4         | 8.7         | 84.7        | 4.5         | 65.4        |
|          | InvAD <a href="#">Zhang et al. (2024a)</a>         | 84.5        | 96.8        | 93.5        | <b>94.3</b> | <b>8.1</b>  | <b>13.9</b> | <b>87.0</b> | <b>7.5</b>  | <b>71.2</b> |
|          | InvAD-lite <a href="#">Zhang et al. (2024a)</a>    | 80.5        | 96.2        | 93.9        | 93.7        | 7.0         | 10.7        | 85.7        | 5.7         | 69.7        |
|          | MambaAD <a href="#">He et al. (2024a)</a>          | 66.0        | 93.0        | 92.7        | 92.6        | 5.2         | 9.4         | 83.9        | 5.0         | 65.8        |
|          | Hybrid UniAD <a href="#">You et al. (2022)</a>     | 65.9        | 92.4        | 92.9        | 93.6        | 5.6         | 9.9         | 84.2        | 5.2         | 66.0        |
|          | RD++ <a href="#">Tien et al. (2023)</a>            | 70.4        | 94.2        | 92.7        | 92.6        | 6.5         | 10.6        | 84.1        | 5.6         | 67.1        |
|          | DesTSeg <a href="#">Zhang et al. (2023c)</a>       | 71.1        | 94.1        | 92.9        | 54.8        | 5.9         | 8.2         | 43.4        | 4.3         | 57.1        |
|          | Aug. DRAEM <a href="#">Zavrtanik et al. (2021)</a> | 52.4        | 89.4        | 94.0        | 47.2        | 0.5         | 1.1         | 22.2        | 0.5         | 48.2        |
|          | SimpleNet <a href="#">Liu et al. (2023)</a>        | 50.2        | 88.7        | 94.0        | 89.8        | 2.0         | 4.2         | 73.3        | 2.1         | 60.0        |
|          | Emb. CFA <a href="#">Lee et al. (2022)</a>         | 57.1        | 91.4        | 94.0        | 84.7        | 9.7         | 17.7        | 56.1        | 9.7         | 61.4        |
|          | CFLOW-AD <a href="#">Gudovskiy et al. (2022)</a>   | 52.6        | 90.1        | 94.0        | 92.4        | 6.5         | 5.6         | 74.5        | 2.9         | 61.8        |
| 11Pig    | PyramidalFlow <a href="#">Lei et al. (2023)</a>    | 50.9        | 89.4        | 94.0        | 91.3        | 2.6         | 5.7         | 71.5        | 2.9         | 60.4        |
|          | Rec. RD <a href="#">Deng &amp; Li (2022)</a>       | 59.3        | 92.0        | 94.0        | 94.1        | 6.0         | 11.7        | 83.2        | 6.2         | 65.3        |
|          | DiAD <a href="#">He et al. (2024b)</a>             | 53.1        | 92.4        | 94.0        | 93.9        | 9.2         | 16.3        | 71.5        | 8.9         | 61.5        |
|          | ViTAD <a href="#">Zhang et al. (2023a)</a>         | 58.8        | 91.6        | 94.5        | 95.7        | 8.1         | 15.6        | 83.0        | 8.5         | 66.1        |
|          | InvAD <a href="#">Zhang et al. (2024a)</a>         | <b>72.2</b> | <b>94.9</b> | <b>94.6</b> | <b>96.8</b> | <b>17.6</b> | <b>25.1</b> | <b>87.6</b> | <b>14.3</b> | <b>72.0</b> |
|          | InvAD-lite <a href="#">Zhang et al. (2024a)</a>    | 66.3        | 93.6        | 94.2        | 96.1        | 13.6        | 21.2        | 85.8        | 11.8        | 69.4        |
|          | MambaAD <a href="#">He et al. (2024a)</a>          | 63.5        | 92.9        | 94.0        | 95.1        | 8.8         | 15.5        | 83.8        | 8.4         | 67.1        |
|          | Hybrid UniAD <a href="#">You et al. (2022)</a>     | 52.6        | 88.9        | 94.0        | 94.5        | 5.1         | 9.6         | 81.2        | 5.0         | 63.0        |
|          | RD++ <a href="#">Tien et al. (2023)</a>            | 60.8        | 92.4        | 94.0        | 94.5        | 6.5         | 12.7        | 83.6        | 6.8         | 65.9        |
|          | DesTSeg <a href="#">Zhang et al. (2023c)</a>       | 65.5        | 93.0        | 94.0        | 62.3        | 8.1         | 13.1        | 48.0        | 7.0         | 58.5        |
|          | Aug. DRAEM <a href="#">Zavrtanik et al. (2021)</a> | 50.4        | 87.0        | <b>92.9</b> | 40.9        | 0.9         | 2.2         | 17.0        | 1.1         | 46.0        |
|          | SimpleNet <a href="#">Liu et al. (2023)</a>        | 50.4        | 86.8        | <b>92.9</b> | 84.1        | 2.5         | 5.0         | 57.9        | 2.5         | 57.0        |
|          | Emb. CFA <a href="#">Lee et al. (2022)</a>         | 56.2        | 90.5        | <b>92.9</b> | 70.8        | 4.3         | 8.7         | 47.5        | 4.5         | 56.3        |
|          | CFLOW-AD <a href="#">Gudovskiy et al. (2022)</a>   | 53.0        | 88.4        | <b>92.9</b> | 86.0        | 4.4         | 7.0         | 55.4        | 3.6         | 58.2        |
|          | PyramidalFlow <a href="#">Lei et al. (2023)</a>    | 42.1        | 85.2        | <b>92.9</b> | 83.4        | 2.3         | 4.7         | 63.7        | 2.4         | 56.0        |
| 12Zalika | Rec. RD <a href="#">Deng &amp; Li (2022)</a>       | 56.8        | 91.0        | <b>92.9</b> | 87.3        | 5.0         | 8.3         | 69.2        | 4.3         | 61.3        |
|          | DiAD <a href="#">He et al. (2024b)</a>             | 34.5        | 82.3        | <b>92.9</b> | 85.4        | 3.5         | 6.1         | 43.2        | 3.2         | 49.7        |
|          | ViTAD <a href="#">Zhang et al. (2023a)</a>         | 56.4        | 91.0        | <b>92.9</b> | 87.4        | 4.8         | 8.6         | 68.2        | 4.5         | 61.2        |
|          | InvAD <a href="#">Zhang et al. (2024a)</a>         | <b>61.2</b> | <b>92.2</b> | <b>92.9</b> | <b>90.2</b> | <b>9.4</b>  | <b>15.5</b> | <b>75.4</b> | <b>8.4</b>  | <b>64.9</b> |
|          | InvAD-lite <a href="#">Zhang et al. (2024a)</a>    | 58.6        | 91.2        | <b>92.9</b> | 88.9        | 7.1         | 11.7        | 72.6        | 6.2         | 63.0        |
|          | MambaAD <a href="#">He et al. (2024a)</a>          | 58.6        | 91.5        | <b>92.9</b> | 86.8        | 4.7         | 8.0         | 68.0        | 4.2         | 61.4        |
|          | Hybrid UniAD <a href="#">You et al. (2022)</a>     | 50.8        | 88.9        | <b>92.9</b> | 86.8        | 3.8         | 6.7         | 67.9        | 3.4         | 59.4        |
|          | RD++ <a href="#">Tien et al. (2023)</a>            | 52.7        | 90.3        | <b>92.9</b> | 87.3        | 5.5         | 8.8         | 69.1        | 4.6         | 60.7        |
|          | DesTSeg <a href="#">Zhang et al. (2023c)</a>       | 50.7        | 88.9        | <b>92.9</b> | 52.8        | 4.7         | 6.0         | 38.8        | 3.1         | 51.5        |

Table A78: Benchmarked results on MAD\_Sim dataset [Zhou et al. \(2024\)](#) by the suggested metrics in [Sec. 3.3](#).

|            | Method                                             | Image-level |             |                      | Pixel-level |            |                      | mAU-PRO     | mIoU-max   | mAD         |
|------------|----------------------------------------------------|-------------|-------------|----------------------|-------------|------------|----------------------|-------------|------------|-------------|
|            |                                                    | mAU-ROC     | mAP         | mF <sub>1</sub> -max | mAU-ROC     | mAP        | mF <sub>1</sub> -max |             |            |             |
| 13Pheonix  | Aug. DRAEM <a href="#">Zavrtanik et al. (2021)</a> | 48.9        | 89.6        | 94.3                 | 51.2        | 0.6        | 1.6                  | 27.8        | 0.8        | 49.0        |
|            | SimpleNet <a href="#">Liu et al. (2023)</a>        | 49.2        | 89.3        | 94.3                 | 82.2        | 1.3        | 2.8                  | 52.3        | 1.4        | 56.1        |
|            | Emb. CFA <a href="#">Lee et al. (2022)</a>         | 56.9        | 91.0        | 94.4                 | 66.2        | 1.6        | 4.6                  | 50.0        | 2.4        | 55.7        |
|            | CFLOW-AD <a href="#">Gudovskiy et al. (2022)</a>   | 52.5        | 90.2        | 94.4                 | 82.3        | 1.5        | 2.9                  | 57.6        | 1.5        | 57.6        |
|            | PyramidalFlow <a href="#">Lei et al. (2023)</a>    | 44.6        | 86.1        | 94.3                 | 78.0        | 1.1        | 2.5                  | 61.6        | 1.2        | 55.4        |
|            | Rec. RD <a href="#">Deng &amp; Li (2022)</a>       | 52.1        | 90.1        | 94.4                 | 83.5        | 2.2        | 3.3                  | 69.3        | 1.7        | 59.2        |
|            | DiAD <a href="#">He et al. (2024b)</a>             | 39.7        | 87.8        | 94.3                 | 83.6        | 1.5        | 3.0                  | 49.9        | 1.5        | 51.4        |
|            | ViTAD <a href="#">Zhang et al. (2023a)</a>         | 53.3        | 90.5        | 94.3                 | 84.6        | 1.7        | 3.4                  | 68.0        | 1.8        | 59.4        |
|            | InvAD <a href="#">Zhang et al. (2024a)</a>         | <b>64.2</b> | <b>92.8</b> | <b>94.6</b>          | <b>87.5</b> | <b>3.7</b> | <b>8.2</b>           | <b>77.4</b> | <b>4.3</b> | <b>64.0</b> |
|            | InvAD-lite <a href="#">Zhang et al. (2024a)</a>    | 56.3        | 91.9        | 94.5                 | 86.0        | 3.1        | 4.6                  | 74.2        | 2.3        | 61.4        |
|            | MambaAD <a href="#">He et al. (2024a)</a>          | 57.5        | 92.1        | 94.4                 | 83.4        | 2.7        | 3.4                  | 69.8        | 1.7        | 60.6        |
|            | Hybrid UniAD <a href="#">You et al. (2022)</a>     | 55.3        | 90.6        | 94.3                 | 85.2        | 1.8        | 3.6                  | 68.1        | 1.8        | 59.9        |
|            | RD++ <a href="#">Tien et al. (2023)</a>            | 56.6        | 91.9        | 94.4                 | 84.1        | 1.9        | 3.7                  | 70.3        | 1.9        | 60.5        |
|            | DesTSeg <a href="#">Zhang et al. (2023c)</a>       | 56.9        | 92.0        | 94.3                 | 52.9        | 2.3        | 4.8                  | 35.7        | 2.5        | 52.5        |
|            | Aug. DRAEM <a href="#">Zavrtanik et al. (2021)</a> | 44.6        | 87.2        | 93.9                 | 50.3        | 1.0        | 1.9                  | 19.3        | 0.9        | 46.7        |
|            | SimpleNet <a href="#">Liu et al. (2023)</a>        | 48.0        | 87.8        | 93.9                 | 71.8        | 1.8        | 4.0                  | 49.8        | 2.0        | 54.2        |
|            | Emb. CFA <a href="#">Lee et al. (2022)</a>         | 57.4        | 91.5        | 93.9                 | 54.1        | 1.8        | 4.1                  | 39.0        | 2.1        | 52.8        |
|            | CFLOW-AD <a href="#">Gudovskiy et al. (2022)</a>   | 55.8        | 91.3        | 93.9                 | 68.1        | 2.2        | 3.5                  | 49.6        | 1.8        | 55.6        |
| 14Elephant | PyramidalFlow <a href="#">Lei et al. (2023)</a>    | 47.0        | 88.0        | 93.9                 | 63.8        | 1.4        | 3.2                  | 51.1        | 1.6        | 53.1        |
|            | Rec. RD <a href="#">Deng &amp; Li (2022)</a>       | 58.9        | 91.7        | 93.9                 | 69.8        | 2.8        | 6.1                  | 64.1        | 3.2        | 58.6        |
|            | DiAD <a href="#">He et al. (2024b)</a>             | 65.8        | <b>94.4</b> | 93.9                 | <b>74.3</b> | 2.0        | 3.9                  | 45.9        | 2.0        | 54.3        |
|            | ViTAD <a href="#">Zhang et al. (2023a)</a>         | 57.0        | 91.9        | 93.9                 | 70.7        | 3.1        | 7.2                  | 64.2        | 3.7        | 58.6        |
|            | InvAD <a href="#">Zhang et al. (2024a)</a>         | <b>66.7</b> | 93.9        | <b>94.0</b>          | 72.5        | 4.6        | <b>11.5</b>          | <b>68.5</b> | <b>6.1</b> | <b>62.1</b> |
|            | InvAD-lite <a href="#">Zhang et al. (2024a)</a>    | 65.9        | 93.9        | 93.9                 | 70.8        | 3.6        | 8.2                  | 65.8        | 4.3        | 60.8        |
|            | MambaAD <a href="#">He et al. (2024a)</a>          | 63.3        | 93.4        | 93.9                 | 69.6        | 2.8        | 6.3                  | 62.8        | 3.2        | 59.5        |
|            | Hybrid UniAD <a href="#">You et al. (2022)</a>     | 58.2        | 91.5        | 93.9                 | 69.5        | 2.2        | 5.1                  | 62.2        | 2.6        | 58.0        |
|            | RD++ <a href="#">Tien et al. (2023)</a>            | 58.7        | 92.3        | <b>94.0</b>          | 70.2        | 2.9        | 6.5                  | 63.3        | 3.3        | 58.7        |
|            | DesTSeg <a href="#">Zhang et al. (2023c)</a>       | 63.7        | 92.9        | <b>94.0</b>          | 54.5        | <b>4.9</b> | 8.0                  | 50.1        | 4.2        | 56.5        |
|            | Aug. DRAEM <a href="#">Zavrtanik et al. (2021)</a> | 52.1        | 86.0        | 91.8                 | 48.6        | 0.8        | 1.8                  | 18.7        | 0.9        | 47.1        |
|            | SimpleNet <a href="#">Liu et al. (2023)</a>        | 49.4        | 82.6        | 91.8                 | 83.3        | 2.4        | 4.8                  | 62.1        | 2.5        | 56.4        |
|            | Emb. CFA <a href="#">Lee et al. (2022)</a>         | 57.1        | <b>89.2</b> | 91.8                 | 65.9        | 2.3        | 4.8                  | 48.2        | 2.4        | 54.8        |
|            | CFLOW-AD <a href="#">Gudovskiy et al. (2022)</a>   | 53.0        | 87.0        | 92.0                 | 83.4        | 3.0        | 5.3                  | 60.2        | 2.7        | 57.7        |
|            | PyramidalFlow <a href="#">Lei et al. (2023)</a>    | <b>59.2</b> | 86.3        | <b>92.2</b>          | 80.0        | 2.2        | 4.7                  | 59.7        | 2.4        | 57.9        |
|            | Rec. RD <a href="#">Deng &amp; Li (2022)</a>       | 50.7        | 86.7        | 92.0                 | 84.0        | 3.2        | 6.9                  | 67.1        | 3.6        | 58.4        |
|            | DiAD <a href="#">He et al. (2024b)</a>             | 53.1        | 88.9        | 91.8                 | 83.4        | 2.5        | 5.8                  | 63.9        | 3.0        | 55.6        |
|            | ViTAD <a href="#">Zhang et al. (2023a)</a>         | 49.8        | 86.9        | 91.8                 | 83.4        | 3.1        | 6.7                  | 66.4        | 3.5        | 58.0        |
| 15Parrot   | InvAD <a href="#">Zhang et al. (2024a)</a>         | 53.9        | 88.6        | 92.0                 | <b>86.6</b> | <b>6.6</b> | <b>14.5</b>          | <b>74.0</b> | <b>7.8</b> | <b>61.8</b> |
|            | InvAD-lite <a href="#">Zhang et al. (2024a)</a>    | 50.0        | 87.3        | 91.8                 | 85.4        | 4.6        | 9.6                  | 69.8        | 5.0        | 59.4        |
|            | MambaAD <a href="#">He et al. (2024a)</a>          | 49.9        | 86.8        | 91.8                 | 83.9        | 3.2        | 6.3                  | 65.1        | 3.3        | 57.9        |
|            | Hybrid UniAD <a href="#">You et al. (2022)</a>     | 46.9        | 86.0        | 91.8                 | 85.5        | 3.5        | 6.5                  | 69.9        | 3.4        | 58.1        |
|            | RD++ <a href="#">Tien et al. (2023)</a>            | 53.9        | 88.1        | 92.0                 | 84.1        | 3.1        | 6.7                  | 66.5        | 3.5        | 59.0        |
|            | DesTSeg <a href="#">Zhang et al. (2023c)</a>       | 54.4        | 88.4        | 91.8                 | 52.7        | 4.9        | 6.0                  | 25.8        | 3.1        | 50.3        |
|            | Aug. DRAEM <a href="#">Zavrtanik et al. (2021)</a> | 53.8        | 90.8        | 94.3                 | 51.5        | 0.5        | 1.6                  | 27.3        | 0.8        | 49.9        |
|            | SimpleNet <a href="#">Liu et al. (2023)</a>        | 54.2        | 90.1        | 94.3                 | 93.2        | 2.5        | 5.0                  | 79.3        | 2.6        | 62.3        |
|            | Emb. CFA <a href="#">Lee et al. (2022)</a>         | 53.5        | 90.3        | <b>94.4</b>          | 71.8        | 1.4        | 4.9                  | 42.5        | 2.5        | 54.8        |
|            | CFLOW-AD <a href="#">Gudovskiy et al. (2022)</a>   | 54.5        | 90.6        | 94.3                 | 93.1        | 2.4        | 4.8                  | 80.3        | 2.5        | 62.5        |
|            | PyramidalFlow <a href="#">Lei et al. (2023)</a>    | 46.7        | 87.7        | <b>94.4</b>          | 91.7        | 1.7        | 4.1                  | 74.2        | 2.1        | 59.6        |
|            | Rec. RD <a href="#">Deng &amp; Li (2022)</a>       | 49.3        | 88.8        | 94.3                 | 93.6        | 3.0        | 6.1                  | 84.3        | 3.1        | 62.1        |
|            | DiAD <a href="#">He et al. (2024b)</a>             | <b>63.5</b> | <b>93.3</b> | 94.3                 | 93.9        | 2.9        | 5.6                  | 82.0        | 2.9        | 62.2        |
|            | ViTAD <a href="#">Zhang et al. (2023a)</a>         | 57.2        | 91.7        | 94.3                 | 93.9        | 3.2        | 6.4                  | 84.6        | 3.3        | 64.0        |
|            | InvAD <a href="#">Zhang et al. (2024a)</a>         | 57.8        | 92.4        | 94.3                 | <b>94.4</b> | <b>5.1</b> | <b>10.7</b>          | <b>86.2</b> | <b>5.6</b> | <b>65.3</b> |
|            | InvAD-lite <a href="#">Zhang et al. (2024a)</a>    | 56.8        | 91.4        | 94.3                 | 94.3        | 3.9        | 8.0                  | 85.6        | 4.2        | 64.4        |
|            | MambaAD <a href="#">He et al. (2024a)</a>          | 53.7        | 90.3        | 94.3                 | 93.9        | 3.2        | 6.5                  | 84.5        | 3.4        | 63.2        |
| 16Cat      | Hybrid UniAD <a href="#">You et al. (2022)</a>     | 52.8        | 89.8        | 94.3                 | 94.1        | 3.0        | 6.4                  | 83.3        | 3.3        | 62.8        |
|            | RD++ <a href="#">Tien et al. (2023)</a>            | 54.2        | 91.3        | 94.3                 | 93.5        | 3.3        | 6.1                  | 84.6        | 3.1        | 63.4        |
|            | DesTSeg <a href="#">Zhang et al. (2023c)</a>       | 54.8        | 90.7        | 94.3                 | 57.7        | 1.6        | 4.5                  | 45.0        | 2.3        | 53.6        |

Table A79: Benchmarked results on MAD\_Sim dataset Zhou et al. (2024) by the suggested metrics in Sec. 3.3.

|             | Method                             | Image-level |             |                      | Pixel-level |             |                      | mAU-PRO     | mIoU-max    | mAD         |
|-------------|------------------------------------|-------------|-------------|----------------------|-------------|-------------|----------------------|-------------|-------------|-------------|
|             |                                    | mAU-ROC     | mAP         | mF <sub>1</sub> -max | mAU-ROC     | mAP         | mF <sub>1</sub> -max |             |             |             |
| 17Scorpion  | Aug. DRAEM Zavrtanik et al. (2021) | 48.2        | 86.3        | 92.9                 | 50.6        | 0.5         | 1.2                  | 21.5        | 0.6         | 47.1        |
|             | SimpleNet Liu et al. (2023)        | 52.6        | 88.2        | 92.9                 | 83.8        | 1.5         | 3.0                  | 55.5        | 1.5         | 56.9        |
|             | Emb. CFA Lee et al. (2022)         | 63.8        | 92.1        | 93.1                 | 76.6        | 3.2         | 6.8                  | 46.9        | 3.5         | 58.2        |
|             | CFLOW-AD Gudovskiy et al. (2022)   | 62.4        | 91.7        | 92.9                 | 89.5        | 3.3         | 4.8                  | 67.4        | 2.5         | 61.8        |
|             | PyramidalFlow Lei et al. (2023)    | 55.3        | 86.5        | 92.9                 | 86.4        | 2.0         | 5.1                  | 58.1        | 2.6         | 58.1        |
|             | Rec. RD Deng & Li (2022)           | 62.9        | 91.2        | 92.9                 | 91.4        | 4.7         | 7.4                  | 81.9        | 3.8         | 64.3        |
|             | DiAD He et al. (2024b)             | 70.9        | 94.4        | <b>93.9</b>          | 87.4        | 2.1         | 4.1                  | 56.6        | 2.1         | 58.5        |
|             | ViTAD Zhang et al. (2023a)         | 59.1        | 89.8        | 93.1                 | 91.1        | 3.3         | 7.2                  | 77.2        | 3.8         | 62.7        |
|             | InvAD Zhang et al. (2024a)         | <b>80.9</b> | <b>96.6</b> | <b>93.4</b>          | <b>93.7</b> | <b>7.2</b>  | <b>10.2</b>          | <b>85.4</b> | <b>5.4</b>  | <b>69.7</b> |
|             | InvAD-lite Zhang et al. (2024a)    | <u>74.5</u> | <u>95.0</u> | 93.0                 | <u>93.4</u> | <u>6.1</u>  | <u>8.5</u>           | <u>84.6</u> | <u>4.4</u>  | <u>67.8</u> |
|             | MambaAD He et al. (2024a)          | 65.1        | 92.4        | 92.9                 | <u>92.7</u> | 4.8         | 7.3                  | 82.3        | 3.8         | 65.1        |
|             | Hybrid UniAD You et al. (2022)     | 70.1        | 93.4        | 92.9                 | 92.2        | <u>5.7</u>  | <u>9.1</u>           | 81.1        | <u>4.8</u>  | <u>66.2</u> |
|             | RD++ Tien et al. (2023)            | 64.2        | 92.4        | 92.9                 | 91.6        | 4.8         | 6.9                  | 81.6        | 3.6         | 64.7        |
|             | DesTSeg Zhang et al. (2023c)       | 70.0        | 93.8        | <u>93.1</u>          | 62.6        | 4.3         | 8.0                  | 48.8        | 4.2         | 58.3        |
|             | Aug. DRAEM Zavrtanik et al. (2021) | 50.7        | 89.7        | <u>94.1</u>          | 51.4        | 0.9         | 1.9                  | 24.9        | 1.0         | 49.0        |
|             | SimpleNet Liu et al. (2023)        | 49.3        | 89.8        | 94.1                 | 90.9        | 3.5         | 6.5                  | 72.7        | 3.3         | 60.6        |
| 18Obesobeso | Emb. CFA Lee et al. (2022)         | 61.4        | 92.8        | 94.1                 | 78.8        | 12.4        | 18.1                 | 60.4        | 10.0        | 62.6        |
|             | CFLOW-AD Gudovskiy et al. (2022)   | 62.0        | 91.9        | 94.1                 | 92.6        | 6.0         | 7.8                  | 79.6        | 4.0         | 64.6        |
|             | PyramidalFlow Lei et al. (2023)    | 62.9        | 93.1        | 94.1                 | 93.5        | 5.5         | 10.6                 | 79.8        | 5.6         | 65.4        |
|             | Rec. RD Deng & Li (2022)           | 63.0        | 93.4        | 94.1                 | 93.4        | 10.7        | 19.2                 | 87.0        | 10.6        | 68.0        |
|             | DiAD He et al. (2024b)             | <b>92.2</b> | <b>99.0</b> | <b>95.2</b>          | <b>95.8</b> | 13.2        | 21.9                 | 84.5        | 12.3        | 71.7        |
|             | ViTAD Zhang et al. (2023a)         | 66.9        | 94.4        | 94.1                 | <u>94.2</u> | <u>16.5</u> | <u>24.1</u>          | <u>88.1</u> | <u>13.7</u> | <u>70.4</u> |
|             | InvAD Zhang et al. (2024a)         | <u>83.7</u> | <u>97.5</u> | <u>95.1</u>          | <u>94.9</u> | <u>16.6</u> | <b>25.8</b>          | <b>90.4</b> | <b>14.8</b> | <b>74.5</b> |
|             | InvAD-lite Zhang et al. (2024a)    | <u>73.4</u> | <u>95.7</u> | <u>94.2</u>          | 93.7        | 12.2        | 20.2                 | 87.9        | 11.2        | <u>70.6</u> |
|             | MambaAD He et al. (2024a)          | 69.6        | 95.1        | <u>94.2</u>          | 93.1        | 11.2        | 21.6                 | 86.5        | 12.1        | 69.7        |
|             | Hybrid UniAD You et al. (2022)     | 71.7        | 94.8        | <u>94.2</u>          | 93.1        | 9.5         | 15.8                 | 84.8        | 8.6         | 68.8        |
|             | RD++ Tien et al. (2023)            | 67.0        | 93.2        | <u>94.2</u>          | 93.1        | 7.9         | 15.6                 | 86.0        | 8.4         | 67.7        |
|             | DesTSeg Zhang et al. (2023c)       | 71.3        | 95.4        | 94.1                 | 63.7        | <b>18.5</b> | <u>23.7</u>          | 53.0        | 13.4        | 63.3        |
|             | Aug. DRAEM Zavrtanik et al. (2021) | 52.3        | 88.6        | 93.3                 | 48.7        | 0.6         | 1.3                  | 19.1        | 0.6         | 47.7        |
|             | SimpleNet Liu et al. (2023)        | 50.9        | 87.4        | 93.3                 | 85.0        | 2.0         | 3.9                  | 65.0        | 2.0         | 58.1        |
|             | Emb. CFA Lee et al. (2022)         | 56.1        | 90.7        | 93.5                 | 78.6        | 4.2         | 8.8                  | 50.1        | 4.6         | 57.8        |
|             | CFLOW-AD Gudovskiy et al. (2022)   | 61.1        | 91.7        | 93.3                 | 88.9        | 4.0         | 6.3                  | 64.4        | 3.3         | 61.5        |
| 19Bear      | PyramidalFlow Lei et al. (2023)    | 53.6        | 89.5        | 93.3                 | 87.3        | 3.1         | 5.7                  | 61.6        | 2.9         | 59.1        |
|             | Rec. RD Deng & Li (2022)           | 61.5        | 92.1        | 93.6                 | 90.8        | 5.6         | 10.0                 | 76.1        | 5.3         | 64.0        |
|             | DiAD He et al. (2024b)             | 64.3        | 93.7        | 93.3                 | 90.1        | 5.1         | <u>13.0</u>          | 65.0        | <u>7.0</u>  | 60.6        |
|             | ViTAD Zhang et al. (2023a)         | 60.1        | 90.8        | 93.5                 | 91.1        | 5.3         | 11.1                 | 75.0        | 5.9         | 63.5        |
|             | InvAD Zhang et al. (2024a)         | <b>71.0</b> | <b>94.5</b> | <b>93.8</b>          | <b>92.5</b> | <b>11.7</b> | <b>18.3</b>          | <b>81.2</b> | <b>10.1</b> | <b>68.7</b> |
|             | InvAD-lite Zhang et al. (2024a)    | <u>67.9</u> | 93.4        | 93.4                 | <u>92.2</u> | <u>11.2</u> | <u>17.0</u>          | <u>78.8</u> | <u>9.3</u>  | <u>67.3</u> |
|             | MambaAD He et al. (2024a)          | 63.5        | 92.3        | 93.5                 | <u>91.2</u> | <u>7.2</u>  | 12.7                 | 75.9        | 6.8         | 64.9        |
|             | Hybrid UniAD You et al. (2022)     | 61.7        | 91.9        | 93.6                 | 90.6        | 5.0         | 9.4                  | 79.4        | 4.9         | 64.2        |
|             | RD++ Tien et al. (2023)            | 64.9        | 92.9        | 93.5                 | 90.9        | 6.5         | 11.2                 | 76.6        | 5.9         | <u>65.0</u> |
|             | DesTSeg Zhang et al. (2023c)       | <u>68.3</u> | 93.5        | 93.5                 | 60.4        | 6.8         | 11.7                 | 52.0        | 6.2         | <u>58.9</u> |
|             | Aug. DRAEM Zavrtanik et al. (2021) | 51.7        | 86.3        | <u>92.7</u>          | 47.5        | 0.5         | 1.0                  | 17.2        | 0.5         | 46.7        |
|             | SimpleNet Liu et al. (2023)        | 55.6        | 88.5        | <u>92.7</u>          | 83.1        | 1.3         | 2.6                  | 55.6        | 1.3         | 57.3        |
|             | Emb. CFA Lee et al. (2022)         | 50.2        | 88.6        | 92.9                 | 68.5        | 1.9         | 5.0                  | 42.2        | 2.6         | 53.3        |
|             | CFLOW-AD Gudovskiy et al. (2022)   | 59.0        | 90.3        | <u>92.7</u>          | 84.9        | 2.0         | 4.4                  | 56.5        | 2.2         | 58.8        |
|             | PyramidalFlow Lei et al. (2023)    | 52.4        | 87.6        | 92.9                 | 84.8        | 1.9         | 4.9                  | 59.9        | 2.5         | 57.8        |
| 20Puppy     | Rec. RD Deng & Li (2022)           | 50.9        | 89.0        | <u>92.7</u>          | 87.0        | 3.5         | 5.6                  | 66.1        | 2.9         | 59.0        |
|             | DiAD He et al. (2024b)             | 46.2        | 88.9        | <u>92.7</u>          | 83.4        | 1.4         | 2.8                  | 52.7        | 1.4         | 52.6        |
|             | ViTAD Zhang et al. (2023a)         | 55.4        | 88.2        | <b>93.0</b>          | <u>87.5</u> | 2.4         | 4.8                  | 66.3        | 2.4         | 59.6        |
|             | InvAD Zhang et al. (2024a)         | <b>61.9</b> | <b>92.0</b> | 92.9                 | <b>89.7</b> | <u>5.7</u>  | <u>9.7</u>           | <b>73.8</b> | <u>5.1</u>  | <b>63.5</b> |
|             | InvAD-lite Zhang et al. (2024a)    | 55.2        | 90.0        | <u>92.7</u>          | 87.9        | 3.7         | 5.9                  | 69.1        | 3.0         | 60.5        |
|             | MambaAD He et al. (2024a)          | 48.8        | 87.3        | <u>92.7</u>          | 86.6        | 2.3         | 4.9                  | 64.6        | 2.5         | 57.9        |
|             | Hybrid UniAD You et al. (2022)     | 56.7        | 90.2        | <u>92.7</u>          | 87.2        | <u>4.5</u>  | <u>10.8</u>          | <u>70.9</u> | <u>5.7</u>  | <u>61.6</u> |
|             | RD++ Tien et al. (2023)            | <u>59.3</u> | 91.4        | <b>93.0</b>          | 86.9        | 3.5         | 6.9                  | 65.4        | 3.6         | <u>61.0</u> |
|             | DesTSeg Zhang et al. (2023c)       | 57.5        | 91.4        | 92.9                 | 55.2        | <b>11.9</b> | <b>11.7</b>          | 37.9        | <b>6.2</b>  | 54.9        |
|             | Aug. DRAEM Zavrtanik et al. (2021) | 48.8        | 88.1        | 93.8                 | 47.9        | 0.7         | 1.5                  | 20.0        | 0.8         | 47.2        |
|             | SimpleNet Liu et al. (2023)        | 51.5        | 88.6        | 93.8                 | 86.1        | 2.3         | 4.5                  | 63.9        | 2.3         | 58.6        |
|             | Emb. CFA Lee et al. (2022)         | 55.7        | 91.1        | 93.8                 | 71.8        | 3.7         | 7.7                  | 45.3        | 4.1         | 56.2        |
|             | CFLOW-AD Gudovskiy et al. (2022)   | 56.9        | 90.9        | 93.8                 | 86.9        | 3.4         | 5.1                  | 63.7        | 2.6         | 60.2        |
|             | PyramidalFlow Lei et al. (2023)    | 49.0        | 88.1        | 93.8                 | 84.4        | 2.4         | 5.0                  | 62.7        | 2.6         | 57.8        |
|             | Rec. RD Deng & Li (2022)           | 57.9        | 91.3        | 93.8                 | 88.3        | 4.4         | 8.2                  | 73.7        | 4.3         | 62.3        |
| Avg         | DiAD He et al. (2024b)             | 65.6        | 93.4        | <b>94.1</b>          | 87.7        | 4.4         | 8.8                  | 61.4        | 4.7         | 59.4        |
|             | ViTAD Zhang et al. (2023a)         | 59.0        | 91.4        | 93.8                 | 89.0        | 4.8         | <u>9.3</u>           | 73.6        | <u>4.9</u>  | 62.8        |
|             | InvAD Zhang et al. (2024a)         | <b>70.4</b> | <b>94.5</b> | <b>94.0</b>          | <b>90.7</b> | <b>8.9</b>  | <b>15.3</b>          | <b>79.1</b> | <b>8.4</b>  | <b>67.4</b> |
|             | InvAD-lite Zhang et al. (2024a)    | <u>65.3</u> | <u>93.4</u> | <u>93.9</u>          | <u>89.7</u> | <u>6.6</u>  | <u>11.4</u>          | <u>76.4</u> | <u>6.1</u>  | <u>65.1</u> |
|             | MambaAD He et al. (2024a)          | 61.4        | 92.4        | 93.8                 | 88.3        | 4.8         | 9.0                  | 73.0        | 4.8         | <u>63.2</u> |
|             | Hybrid UniAD You et al. (2022)     | 59.4        | 91.5        | 93.8                 | 89.0        | 4.4         | 8.4                  | <u>74.6</u> | 4.4         | 62.8        |
|             | RD++ Tien et al. (2023)            | 58.6        | 91.7        | 93.8                 | 88.3        | 4.4         | 8.1                  | 73.2        | 4.2         | 62.4        |
|             | DesTSeg Zhang et al. (2023c)       | 59.2        | 91.9        | 93.8                 | 56.8        | <u>5.7</u>  | 8.6                  | 41.8        | 4.5         | 54.9        |



## V DETAILED QUANTITATIVE RESULTS ON UNI-MEDICAL DATASET UNDER 300 EPOCHS

Table A80: Benchmarked results on Uni-Medical dataset [Zhang et al. \(2023a\)](#) by the suggested metrics in Sec. 3.3.

|       | Method                                             | Image-level |             |                      | Pixel-level |             |                      | mAU-PRO     | mIoU-max    | mAD         |
|-------|----------------------------------------------------|-------------|-------------|----------------------|-------------|-------------|----------------------|-------------|-------------|-------------|
|       |                                                    | mAU-ROC     | mAP         | mF <sub>1</sub> -max | mAU-ROC     | mAP         | mF <sub>1</sub> -max |             |             |             |
| brain | Aug. DRAEM <a href="#">Zavrtanik et al. (2021)</a> | 53.0        | 84.2        | 90.6                 | 28.7        | 2.0         | 6.2                  | 5.7         | 3.2         | 43.3        |
|       | SimpleNet <a href="#">Liu et al. (2023)</a>        | 77.7        | 94.1        | 90.7                 | 93.7        | 36.4        | 39.3                 | 71.1        | 24.4        | 73.8        |
|       | Emb. CFA <a href="#">Lee et al. (2022)</a>         | 67.0        | 90.8        | 90.6                 | 45.2        | 6.2         | 7.4                  | 7.5         | 3.8         | 49.7        |
|       | CFLOW-AD <a href="#">Gudovskiy et al. (2022)</a>   | 85.8        | 96.2        | 92.1                 | 94.5        | 55.8        | 17.8                 | 73.6        | 9.8         | 75.9        |
|       | PyramidalFlow <a href="#">Lei et al. (2023)</a>    | 66.6        | 89.6        | 90.6                 | 87.0        | 12.4        | 18.9                 | 54.6        | 10.4        | 62.7        |
|       | Rec. RD <a href="#">Deng &amp; Li (2022)</a>       | 85.0        | 95.4        | 92.1                 | 96.4        | 45.6        | 49.0                 | 82.3        | 32.5        | 79.6        |
|       | DiAD <a href="#">He et al. (2024b)</a>             | <b>93.6</b> | <b>98.2</b> | <b>95.2</b>          | 95.3        | 37.3        | 42.3                 | 80.4        | 26.9        | 77.5        |
|       | ViTAD <a href="#">Zhang et al. (2023a)</a>         | 89.0        | 97.3        | 92.9                 | <b>97.6</b> | <b>60.2</b> | <b>58.0</b>          | 83.6        | <b>40.9</b> | 84.0        |
|       | InvAD <a href="#">Zhang et al. (2024a)</a>         | 89.5        | 97.2        | 92.5                 | <b>97.6</b> | 56.5        | 57.4                 | 85.6        | 40.3        | 83.7        |
|       | InvAD-lite <a href="#">Zhang et al. (2024a)</a>    | 84.4        | 95.5        | 91.7                 | 96.3        | 44.8        | 48.1                 | 81.9        | 31.7        | 79.2        |
|       | MambaAD <a href="#">He et al. (2024a)</a>          | 91.9        | 98.0        | 93.5                 | <b>97.6</b> | 56.6        | <b>58.0</b>          | <b>86.4</b> | 40.8        | <b>84.6</b> |
|       | Hybrid UniAD <a href="#">You et al. (2022)</a>     | 90.2        | 97.6        | 92.9                 | <b>97.6</b> | 58.8        | 57.2                 | 83.3        | 40.0        | 83.9        |
|       | RD++ <a href="#">Tien et al. (2023)</a>            | 85.8        | 96.0        | 91.6                 | 96.9        | 48.3        | 52.2                 | 83.8        | 35.3        | 80.7        |
|       | DesTSeg <a href="#">Zhang et al. (2023c)</a>       | 80.4        | 93.8        | 91.2                 | 82.1        | 49.3        | 51.0                 | 55.4        | 34.2        | 74.0        |
|       | Aug. DRAEM <a href="#">Zavrtanik et al. (2021)</a> | 56.2        | 47.3        | 64.0                 | 26.2        | 0.5         | 2.4                  | 9.8         | 1.2         | 32.8        |
|       | SimpleNet <a href="#">Liu et al. (2023)</a>        | 52.5        | 44.7        | 62.3                 | 96.8        | 8.5         | 13.7                 | 86.9        | 7.4         | 52.3        |
|       | Emb. CFA <a href="#">Lee et al. (2022)</a>         | 37.1        | 35.0        | 61.2                 | 14.0        | 0.2         | 0.8                  | 0.7         | 0.4         | 24.2        |
|       | CFLOW-AD <a href="#">Gudovskiy et al. (2022)</a>   | 63.8        | 54.0        | 63.5                 | 96.0        | 2.9         | 5.7                  | 87.8        | 2.9         | 54.3        |
|       | PyramidalFlow <a href="#">Lei et al. (2023)</a>    | 65.7        | 56.1        | 65.7                 | 82.0        | 1.7         | 2.3                  | 41.4        | 1.2         | 47.2        |
|       | Rec. RD <a href="#">Deng &amp; Li (2022)</a>       | 55.4        | 45.4        | 64.1                 | 96.5        | 5.3         | 10.0                 | 90.6        | 5.3         | 52.8        |
|       | DiAD <a href="#">He et al. (2024b)</a>             | 65.8        | 60.1        | 63.9                 | 96.9        | 7.6         | 13.9                 | 91.5        | 7.5         | 57.1        |
|       | ViTAD <a href="#">Zhang et al. (2023a)</a>         | 63.5        | 54.5        | 65.4                 | <b>97.8</b> | 11.1        | 18.9                 | 92.5        | 10.4        | 58.1        |
|       | InvAD <a href="#">Zhang et al. (2024a)</a>         | 62.5        | 52.1        | 65.2                 | 96.8        | 6.8         | 12.6                 | 92.3        | 6.7         | 56.0        |
|       | InvAD-lite <a href="#">Zhang et al. (2024a)</a>    | 56.4        | 46.1        | 63.5                 | 96.1        | 4.8         | 9.3                  | 89.7        | 4.9         | 52.7        |
|       | MambaAD <a href="#">He et al. (2024a)</a>          | 61.1        | 50.9        | 63.8                 | 96.8        | 8.3         | 15.5                 | 91.7        | 8.4         | 55.8        |
| liver | Hybrid UniAD <a href="#">You et al. (2022)</a>     | 64.7        | 51.5        | 64.9                 | 97.1        | 7.9         | 14.1                 | <b>92.8</b> | 7.6         | 56.7        |
|       | RD++ <a href="#">Tien et al. (2023)</a>            | 55.5        | 44.6        | 64.1                 | 96.4        | 5.3         | 9.9                  | 90.9        | 5.2         | 52.7        |
|       | DesTSeg <a href="#">Zhang et al. (2023c)</a>       | <b>74.8</b> | <b>72.4</b> | <b>66.0</b>          | 87.6        | <b>38.6</b> | <b>41.8</b>          | 84.5        | <b>26.4</b> | <b>67.1</b> |
|       | Aug. DRAEM <a href="#">Zavrtanik et al. (2021)</a> | 66.1        | 57.9        | 60.4                 | 42.5        | 3.3         | 9.6                  | 11.9        | 5.1         | 39.1        |
|       | SimpleNet <a href="#">Liu et al. (2023)</a>        | 87.3        | 87.1        | 77.1                 | 94.2        | 62.8        | 58.0                 | 79.6        | 40.9        | 78.7        |
|       | Emb. CFA <a href="#">Lee et al. (2022)</a>         | 64.6        | 62.6        | 59.5                 | 55.2        | 8.1         | 11.5                 | 18.6        | 6.1         | 42.8        |
|       | CFLOW-AD <a href="#">Gudovskiy et al. (2022)</a>   | 87.4        | 85.5        | 76.3                 | 95.6        | 60.0        | 55.5                 | 83.7        | 38.4        | 78.4        |
|       | PyramidalFlow <a href="#">Lei et al. (2023)</a>    | 47.7        | 42.8        | 59.5                 | 77.7        | 12.2        | 23.4                 | 44.7        | 13.3        | 44.8        |
|       | Rec. RD <a href="#">Deng &amp; Li (2022)</a>       | 88.8        | 86.7        | 77.7                 | 96.4        | 65.7        | 60.6                 | 86.6        | 43.4        | 80.9        |
|       | DiAD <a href="#">He et al. (2024b)</a>             | 89.2        | 87.5        | 79.0                 | 95.7        | 62.7        | 58.3                 | 84.3        | 41.2        | 79.5        |
|       | ViTAD <a href="#">Zhang et al. (2023a)</a>         | 92.0        | 90.0        | 82.0                 | 95.5        | 69.3        | 63.8                 | 83.3        | 46.8        | 83.0        |
|       | InvAD <a href="#">Zhang et al. (2024a)</a>         | 92.1        | <b>90.6</b> | 82.1                 | <b>97.2</b> | <b>72.9</b> | <b>66.5</b>          | <b>89.0</b> | <b>49.8</b> | <b>84.8</b> |
|       | InvAD-lite <a href="#">Zhang et al. (2024a)</a>    | 92.1        | 90.2        | 82.8                 | 96.1        | 66.5        | 61.8                 | 85.7        | 44.7        | 82.9        |
|       | MambaAD <a href="#">He et al. (2024a)</a>          | <b>93.8</b> | 87.9        | <b>86.6</b>          | 95.9        | 64.2        | 64.7                 | 85.5        | 47.8        | 83.5        |
|       | Hybrid UniAD <a href="#">You et al. (2022)</a>     | 86.2        | 80.7        | 74.8                 | 94.9        | 50.4        | 52.7                 | 81.2        | 35.8        | 75.2        |
|       | RD++ <a href="#">Tien et al. (2023)</a>            | 90.3        | 87.7        | 79.9                 | 96.7        | 69.5        | 63.8                 | 87.5        | 46.9        | 82.7        |
|       | DesTSeg <a href="#">Zhang et al. (2023c)</a>       | 90.9        | 88.9        | 81.9                 | 80.0        | 64.0        | 58.7                 | 58.5        | 41.6        | 76.3        |
|       | Aug. DRAEM <a href="#">Zavrtanik et al. (2021)</a> | 58.5        | 63.2        | 71.7                 | 32.5        | 2.0         | 6.1                  | 9.1         | 3.2         | 38.4        |
|       | SimpleNet <a href="#">Liu et al. (2023)</a>        | 72.5        | 75.3        | 76.7                 | 94.9        | 35.9        | 37.0                 | 79.2        | 24.2        | 68.3        |
|       | Emb. CFA <a href="#">Lee et al. (2022)</a>         | 56.3        | 62.8        | 70.4                 | 38.1        | 4.8         | 6.6                  | 8.9         | 3.4         | 38.9        |
|       | CFLOW-AD <a href="#">Gudovskiy et al. (2022)</a>   | 79.0        | 78.5        | 77.3                 | 95.4        | 39.6        | 26.3                 | 81.7        | 17.0        | 69.5        |
|       | PyramidalFlow <a href="#">Lei et al. (2023)</a>    | 60.0        | 62.8        | 71.9                 | 82.2        | 8.8         | 14.9                 | 46.9        | 8.3         | 51.5        |
|       | Rec. RD <a href="#">Deng &amp; Li (2022)</a>       | 76.4        | 75.8        | 77.9                 | 96.4        | 38.9        | 39.8                 | 86.5        | 27.0        | 71.1        |
|       | DiAD <a href="#">He et al. (2024b)</a>             | <b>82.9</b> | 81.9        | 79.4                 | 96.0        | 35.9        | 38.2                 | 85.4        | 25.2        | 71.4        |
|       | ViTAD <a href="#">Zhang et al. (2023a)</a>         | 81.5        | 80.6        | 80.1                 | 97.0        | 46.8        | 46.9                 | 86.5        | 32.7        | <b>75.0</b> |
|       | InvAD <a href="#">Zhang et al. (2024a)</a>         | 81.3        | 80.0        | 79.9                 | <b>97.2</b> | 45.4        | 45.5                 | <b>89.0</b> | 32.3        | 74.8        |
|       | InvAD-lite <a href="#">Zhang et al. (2024a)</a>    | 77.6        | 77.2        | 79.3                 | 96.2        | 38.7        | 39.7                 | 85.7        | 27.1        | 71.6        |
|       | MambaAD <a href="#">He et al. (2024a)</a>          | 82.3        | 78.9        | <b>81.3</b>          | 96.7        | 43.0        | 46.1                 | 87.9        | 32.4        | 74.6        |
| Avg   | Hybrid UniAD <a href="#">You et al. (2022)</a>     | 80.4        | 76.6        | 77.5                 | 96.5        | 39.0        | 41.3                 | 85.8        | 27.8        | 71.9        |
|       | RD++ <a href="#">Tien et al. (2023)</a>            | 77.2        | 76.1        | 78.5                 | 96.7        | 41.0        | 41.9                 | 87.4        | 29.1        | 72.0        |
|       | DesTSeg <a href="#">Zhang et al. (2023c)</a>       | 82.0        | <b>85.0</b> | 79.7                 | 83.2        | <b>50.6</b> | <b>50.5</b>          | 66.1        | <b>34.1</b> | 72.4        |
